# Supplementary material for: A Combined Metabolomic and Metagenomic Approach to Discriminate Raw Milk for the Production of Hard Cheese
Source: Foods. 2021 Jan 6;10(1):109. doi: 10.3390/foods10010109 (PMC7825538; doi:10.3390/foods10010109)
Supplement: Supplementary file 1 [file foods-10-00109-s001.xlsx]

## Sheet: Untargeted profiling BMDB
Compound	PR10_-r001	PR10_-r002	PR10_-r003	PR11_-r001	PR11_-r002	PR11_-r003	PR12_-r001	PR12_-r002	PR12_-r003	PR13_-r001	PR13_-r002	PR13_-r003	PR14_-r001	PR14_-r002	PR14_-r003	PR15_-r001	PR15_-r002	PR15_-r003	PR16_-r001	PR16_-r002	PR16_-r003	PR17_-r001	PR17_-r002	PR17_-r003	PR18_-r001	PR18_-r002	PR18_-r003	PR19_-r001	PR19_-r002	PR19_-r003	PR20_-r001	PR20_-r002	PR20_-r003	PR21_-r001	PR21_-r002	PR21_-r003	PR22_-r001	PR22_-r002	PR22_-r003	PR23_-r001	PR23_-r002	PR23_-r003	PR24_-r001	PR24_-r002	PR24_-r003	PR25_-r001	PR25_-r002	PR25_-r003	PR26_-r001
8-Oxoguanine	1	1	1	1	1	1	1	1	1	1	1	1	1	1	1	1	1	1	1	1	1	2253328	1	1	1	180608	1	4235884	1	2788001	1	1	1	1	1	1	1	1	1	1	48799	1	1	261224	1	1	248578	1	1
Benzene-1,2,4-triol	7319662	7056677	5997300	6684426	7017482	6969671	6998540	6720576	6401325	5461426	5304549	885655	2668393	6135989	5894085	4411772	6958588	6867755	6884235	6699873	8353620	7258858	8193969	7876125	8624834	7744562	6833234	7506500	7217417	6718163	7054694	7066363	8357299	8207554	8229165	8384768	7901279	8547282	8775418	7184541	8385150	8509315	8722194	8447863	8470851	8358896	7461437	8163227	8279717
3-Hydroxyadipic acid 3,6-lactone	7319662	7056677	5997300	6684426	7017482	6969671	6998540	6720576	6401325	5461426	5304549	885655	2668393	6135989	5894085	4411772	6958588	6867755	6884235	6699873	8353620	7258858	8193969	7876125	8624834	7744562	6833234	7506500	7217417	6718163	7054694	7066363	8357299	8207554	8229165	8384768	7901279	8547282	8775418	7184541	8385150	8509315	8722194	8447863	8470851	8358896	7461437	8163227	8279717
3-Hexenedioic acid	7319662	7056677	5997300	6684426	7017482	6969671	6998540	6720576	6401325	5461426	5304549	885655	2668393	6135989	5894085	4411772	6958588	6867755	6884235	6699873	8353620	7258858	8193969	7876125	8624834	7744562	6833234	7506500	7217417	6718163	7054694	7066363	8357299	8207554	8229165	8384768	7901279	8547282	8775418	7184541	8385150	8509315	8722194	8447863	8470851	8358896	7461437	8163227	8279717
3-Methylglutaconic acid	7319662	7056677	5997300	6684426	7017482	6969671	6998540	6720576	6401325	5461426	5304549	885655	2668393	6135989	5894085	4411772	6958588	6867755	6884235	6699873	8353620	7258858	8193969	7876125	8624834	7744562	6833234	7506500	7217417	6718163	7054694	7066363	8357299	8207554	8229165	8384768	7901279	8547282	8775418	7184541	8385150	8509315	8722194	8447863	8470851	8358896	7461437	8163227	8279717
(E)-2-Methylglutaconic acid	7319662	7056677	5997300	6684426	7017482	6969671	6998540	6720576	6401325	5461426	5304549	885655	2668393	6135989	5894085	4411772	6958588	6867755	6884235	6699873	8353620	7258858	8193969	7876125	8624834	7744562	6833234	7506500	7217417	6718163	7054694	7066363	8357299	8207554	8229165	8384768	7901279	8547282	8775418	7184541	8385150	8509315	8722194	8447863	8470851	8358896	7461437	8163227	8279717
1,2,3-Trihydroxybenzene	7319662	7056677	5997300	6684426	7017482	6969671	6998540	6720576	6401325	5461426	5304549	885655	2668393	6135989	5894085	4411772	6958588	6867755	6884235	6699873	8353620	7258858	8193969	7876125	8624834	7744562	6833234	7506500	7217417	6718163	7054694	7066363	8357299	8207554	8229165	8384768	7901279	8547282	8775418	7184541	8385150	8509315	8722194	8447863	8470851	8358896	7461437	8163227	8279717
Phosphocreatinine	9911709	9538105	9797373	1	1	1	1	1	1	1	1	1	1	1	1	1	1	9702655	1	1	1	1	1	1	1	1	1	1	1	1	9799158	9931601	1	9921057	9843503	9673572	1	5991790	10112315	1	6061794	10324544	1	10068085	7101220	9894612	10240508	1	8681795
Phenylphosphate	1	1	1	1	1	1	1	1	1	1	1	1	1	1	1	1	1	1	5584545	1	1	1	958740	1	1	858341	1	424439	1	233138	1	1145619	2176766	8508588	1	1	1	1168915	1613417	1	855549	1	1	2951945	9142238	7961532	1	2822526	1
N-Acetyl-S-(N-methylcarbamoyl)cysteine	1	1	1	1	1	1	1	1	1	1	1	1	1	1	1	1	1	1	1	1	1	1	1	1	1	1	1	1	1	1	1	1	1	1	1	1	1	1	1	1	1	1	1	1	1	1	1	1	1
L-beta-aspartyl-L-glutamic acid	1	1	1	1	1	1	1	1	1	1	38063	38394	1	1	1	28264	27251	1	1	1	1	1	1	1	1	1	1	1	1	1	1	1	1	1	1	1	1	1	1	1	1	1	1	1	1	1	1	1	1
Uridine	1	1	1	1	1	1	1	1	1	1	38063	38394	1	1	1	28264	27251	1	1	1	1	1	1	1	1	1	1	1	1	1	1	1	1	1	1	1	1	1	1	1	1	1	1	1	1	1	1	1	1
Glutamylaspartic acid	1	1	1	1	1	1	1	1	1	1	38063	38394	1	1	1	28264	27251	1	1	1	1	1	1	1	1	1	1	1	1	1	1	1	1	1	1	1	1	1	1	1	1	1	1	1	1	1	1	1	1
Aspartyl-Glutamate	1	1	1	1	1	1	1	1	1	1	38063	38394	1	1	1	28264	27251	1	1	1	1	1	1	1	1	1	1	1	1	1	1	1	1	1	1	1	1	1	1	1	1	1	1	1	1	1	1	1	1
Pseudouridine	1	1	1	1	1	1	1	1	1	1	38063	38394	1	1	1	28264	27251	1	1	1	1	1	1	1	1	1	1	1	1	1	1	1	1	1	1	1	1	1	1	1	1	1	1	1	1	1	1	1	1
3,3',4'5-Tetrahydroxystilbene	853472	856472	838782	537532	540135	558026	1108950	1102352	1091638	1463067	1414274	1435464	671286	669515	662820	1140461	1142076	1134264	1096646	1109834	1085130	1572506	1507274	1590193	507700	425269	482318	1255847	1230971	1225761	1390175	1407685	1389956	1161716	1137105	1072240	1888586	1967993	1989874	1666564	1697146	1712481	1483874	1550122	1509428	702875	719448	689805	1047352
Cystathionine sulfoxide	97954	109008	89022	1	1	1	1	1	1	1	1	1	1	1	1	1	1	1	1	1	1	1	1	1	1	1	1	1	1	1	24405	109874	137929	48529	1	31180	36319	181077	188484	1	1	24271	71655	92568	125748	1	1	1	1
Ethenodeoxyadenosine	1	1	1	1	1	1	1	1	1	1	1	1	1	1	1	1	1	1	1	1	1	1	1	1	1	1	1	1	1	1	1	1	1	1	1	1	1	1	1	1	1	1	1	1	1	1	1	1	1
Glucosamine 6-sulfate	107466	166681	571815	297522	272698	346090	449285	244304	363694	771353	2287371	2381919	1378972	609144	1540941	842844	834099	836865	141041	1	19365	1	584056	1	251125	385727	293982	1	551748	649743	63161	759598	1	1	249284	1	1	1	1	785362	669974	888376	40619	827113	1	280677	186711	285724	656831
N-Sulfo-D-glucosamine	107466	166681	571815	297522	272698	346090	449285	244304	363694	771353	2287371	2381919	1378972	609144	1540941	842844	834099	836865	141041	1	19365	1	584056	1	251125	385727	293982	1	551748	649743	63161	759598	1	1	249284	1	1	1	1	785362	669974	888376	40619	827113	1	280677	186711	285724	656831
Sorbitol-6-phosphate	1	1	1	1	1	1	1	1	1	1	1	1	1	1	1	1	1	1	1	1	1	1	1	1	1	1	1	1	1	1	1	1	114335	1	1	1	151397	151442	154296	1	1	1	1	1	1	1	1	1	1
Mannitol 1-phosphate	1	1	1	1	1	1	1	1	1	1	1	1	1	1	1	1	1	1	1	1	1	1	1	1	1	1	1	1	1	1	1	1	114335	1	1	1	151397	151442	154296	1	1	1	1	1	1	1	1	1	1
16-Methylheptadecanoic acid	1	1	1	1	1	1	1	1	1	1	1	1	1	1	1	1	1	1	1	1	1	1	1	1	1	1	1	1	1	1	1	1	1	1	1	1	1	1	1	1	1	1	1	1	1	1	1	1	1
Stearic acid	1	1	1	1	1	1	1	1	1	1	1	1	1	1	1	1	1	1	1	1	1	1	1	1	1	1	1	1	1	1	1	1	1	1	1	1	1	1	1	1	1	1	1	1	1	1	1	1	1
Hawkinsin	1	1	1	1	1	1	1	1	1	1	216538	228955	415879	407173	402135	1	1	1	1	1	1	1	1	1	1	1	1	1	1	1	1	1	1	1	1	1	1	1	1	1	1	1	1	1	1	1	1	1	1
Myristoylglycine	1	1	1	1	1	1	1	1	1	1	1	1	1	1	1	1	1	1	1	1	1	1	1	1	1	1	1	1	1	1	1	1	1	1	1	1	1	1	1	1	1	1	1	1	1	1	1	1	1
4-oxo-Retinoic acid	1	1	1	1	1	1	1	1	1	1	1	1	1	1	1	1	1	1	1	1	1	1	1	1	1	1	1	1	1	1	1	1	1	1	1	1	1	1	1	1	1	1	1	1	1	105880	112905	107916	1
Tryptophyl-Asparagine	1	1	1	1	1	1	1	1	1	1	1	1	1	1	1	1	1	1	1	1	1	1	1	1	1	1	1	1	1	1	1	1	1	1	1	1	1	1	1	1	1	1	1	1	1	1	1	1	1
Asparaginyl-Tryptophan	1	1	1	1	1	1	1	1	1	1	1	1	1	1	1	1	1	1	1	1	1	1	1	1	1	1	1	1	1	1	1	1	1	1	1	1	1	1	1	1	1	1	1	1	1	1	1	1	1
Histidyltyrosine	1	1	1	1	1	1	1	1	1	1	1	1	1	1	1	1	1	1	1	1	1	1	1	1	1	1	1	1	1	1	1	1	1	1	1	1	1	1	1	1	1	1	1	1	1	1	1	1	1
Tyrosyl-Histidine	1	1	1	1	1	1	1	1	1	1	39159	102919	143474	42413	35242	51169	1	29021	1	1	1	1	1	1	1	1	1	1	1	1	1	1	1	1	1	1	1	1	1	1	1	1	1	1	1	1	1	1	1
Margaroylglycine	1	1	1	1	1	1	1	1	1	1	1	1	1	1	1	1	1	1	1	1	1	1	1	1	1	1	1	1	1	1	1	1	1	1	1	1	1	1	1	1	1	1	1	1	1	1	1	1	1
Palmitoylglycine	331752	346317	341338	387986	461353	439929	265988	274958	271807	482949	469352	493666	137109	152830	149642	535465	522776	566938	367128	352731	380264	385000	1	1	230788	217927	219255	347442	292507	349316	311635	313311	325124	300771	1	308298	331024	398330	399095	289551	267523	1	484692	1	479791	274849	278270	281164	242722
Picrocrocin	1	1	1	1	1	1	1	1	1	1	1	1	1	1	1	1	1	1	1	1	1	1	1	1	1	1	1	1	1	1	1	1	1	1	1	1	1	1	1	1	1	1	1	1	1	50479	37291	54207	1
Neomenthol-glucuronide	1	1	1	1	1	1	1	1	1	1	1	1	1	1	1	1	1	1	1	1	1	1	1	1	1	1	1	1	1	1	1	1	1	1	1	1	1	1	1	1	1	1	1	1	1	53132	52366	54210	1
10-Nitrolinoleic acid	1	1	1	1	1	1	1	1	1	1	1	1	1	1	1	1	1	1	1	1	1	1	1	1	1	1	1	1	1	1	1	1	1	1	1	1	1	1	1	1	1	1	1	1	1	1	1	1	1
3'-Hydroxystanozolol	1	1	1	1	1	1	741305	1	755166	1158987	448207	458684	1	1	1	807682	1277490	1303974	1	1	1	1	1	1	715086	755397	730341	1	1	1	1	1	1	1	1	1	1	1	1	863171	785470	831937	1	1	1	915167	940492	877067	1
16b-Hydroxystanozolol	1	1	1	1	1	1	741305	1	755166	1158987	1	1	1	1	1	1	1277490	1303974	1	1	1	1	1	1	715086	755397	730341	1	1	1	1	1	1	1	1	1	1	1	1	863171	785470	831937	1	1	1	1	1	1	1
4b-Hydroxystanozolol	1	1	1	1	1	1	741305	1	755166	1158987	1	1	1	1	1	1	1277490	1303974	1	1	1	1	1	1	715086	755397	730341	1	1	1	1	1	1	1	1	1	1	1	1	863171	785470	831937	1	1	1	1	1	1	1
4,8 dimethylnonanoyl carnitine	1	1	1	1	1	104085	1	1	1	190037	198268	196800	1	1	1	163984	178809	178531	1	1	1	1	1	1	1	1	1	1	1	1	1	1	1	1	1	1	1	1	1	1	1	1	113632	1	1	1	1	1	1
Stanozolol	1	1	1	1	1	104085	1	1	1	190037	198268	196800	1	1	1	163984	178809	178531	1	1	1	1	1	1	1	1	1	1	1	1	1	1	1	1	1	1	1	1	1	1	1	1	118963	1	1	1	1	1	1
Oleoyl glycine	1	1	1	1	1	1	1	1	1	648566	1	701977	1	1	1	1	504500	523431	1	1	1	1	1	1	1	1	1	1	1	1	1	1	1	1	1	1	1	1	1	1	1	1	1	1	1	1	1	1	1
Stearoylglycine	714963	729994	688084	499190	620560	664420	637205	1555940	536131	3075273	3690732	2334115	3052713	775492	723669	3872986	1888984	1759558	607382	1730264	794309	633098	745530	624983	653378	685323	544852	678152	629760	862410	1622625	749038	1773139	689203	587760	660462	632923	1427304	737201	502123	636999	621442	867825	831413	900260	2261116	648585	691205	693785
Pregnanetriolone	140852	143470	146064	952320	181916	156167	106778	103094	111720	147235	105282	115903	311020	67292	70805	174276	179732	191859	171596	165806	172765	167875	126426	131928	88656	72265	77488	119595	503025	151728	138966	146416	119453	103206	108670	116732	755555	182153	146362	92293	207238	121121	210083	197632	206771	121138	132613	193338	69049
MG(0:0/18:4(6Z,9Z,12Z,15Z)/0:0)	140852	143470	146064	952320	181916	156167	106778	103094	111720	147235	105282	115903	311020	67292	70805	174276	179732	191859	171596	165806	172765	167875	126426	131928	88656	72265	77488	119595	503025	151728	138966	146416	119453	103206	108670	116732	755555	182153	146362	92293	207238	121121	210083	197632	206771	121138	132613	193338	69049
MG(18:4(6Z,9Z,12Z,15Z)/0:0/0:0)	140852	143470	146064	952320	181916	156167	106778	103094	111720	147235	105282	115903	311020	67292	70805	174276	179732	191859	171596	165806	172765	167875	126426	131928	88656	72265	77488	119595	503025	151728	138966	146416	119453	103206	108670	116732	755555	182153	146362	92293	207238	121121	210083	197632	206771	121138	132613	193338	69049
Tetrahydrocorticosterone	140852	143470	146064	952320	181916	156167	106778	103094	111720	147235	105282	115903	311020	67292	70805	174276	179732	191859	171596	165806	172765	167875	126426	131928	88656	72265	77488	119595	503025	151728	138966	146416	119453	103206	108670	116732	755555	182153	146362	92293	207238	121121	210083	197632	206771	121138	132613	193338	69049
Tetrahydrodeoxycortisol	140852	143470	146064	952320	181916	156167	106778	103094	111720	147235	105282	115903	311020	67292	70805	174276	179732	191859	171596	165806	172765	167875	126426	131928	88656	72265	77488	119595	503025	151728	138966	146416	119453	103206	108670	116732	755555	182153	146362	92293	207238	121121	210083	197632	206771	121138	132613	193338	69049
5a-Tetrahydrocorticosterone	140852	143470	146064	952320	181916	156167	106778	103094	111720	147235	105282	115903	311020	67292	70805	174276	179732	191859	171596	165806	172765	167875	126426	131928	88656	72265	77488	119595	503025	151728	138966	146416	119453	103206	108670	116732	755555	182153	146362	92293	207238	121121	210083	197632	206771	121138	132613	193338	69049
Cortol	140852	143470	146064	952320	181916	156167	106778	103094	111720	147235	105282	115903	311020	67292	70805	174276	179732	191859	171596	165806	172765	167875	126426	131928	88656	72265	77488	119595	503025	151728	138966	146416	119453	103206	108670	116732	755555	182153	146362	92293	207238	121121	210083	197632	206771	121138	132613	193338	69049
Beta-Cortol	140852	143470	146064	952320	181916	156167	106778	103094	111720	147235	105282	115903	311020	67292	70805	174276	179732	191859	171596	165806	172765	167875	126426	131928	88656	72265	77488	119595	503025	151728	138966	146416	119453	103206	108670	116732	755555	182153	146362	92293	207238	121121	210083	197632	206771	121138	132613	193338	69049
Finasteride	1	1	1	210969	255010	255463	289927	295284	302817	1475595	1543603	1593964	1	1	1	2306337	2228377	2284982	1	1	1	1	1	1	1	1	1	1	1	1	1	1	1	1	1	1	246825	288642	280505	446673	437059	467270	842492	823440	834376	2465612	2504405	2414981	1
Aldosterone	1	1	1	1	1	1	1	1	1	1	1	1	1	1	1	1	1	1	1	1	1	1	1	1	1	1	1	1	1	1	1	1	1	1	1	1	1	1	1	1	1	1	1	1	1	73049	73782	55993	1
Cortisone	1	1	1	1	1	1	1	1	1	1	1	1	1	1	1	1	1	1	1	1	1	1	1	1	1	1	1	1	1	1	1	1	1	1	1	1	1	1	1	1	1	1	1	1	1	73049	73782	55993	1
Danazol	1	1	1	1	1	1	1	1	1	1	1	1	1	1	1	1	1	1	1	1	1	1	1	1	1	1	1	1	1	1	1	1	1	1	1	1	1	1	1	1	1	1	1	1	1	157913	137196	130752	1
Tetracosatetraenoic acid n-6	1	1	1	1	1	1	1	1	1	1	1	1	1	1	1	1	1	1	1	1	1	1	1	1	1	1	1	1	1	1	1	1	1	1	1	1	1	1	1	1	1	1	55545	68014	49821	1	1	1	1
Topiramate	1	1	1	1	1	1	1	1	1	1	1	1	1	1	1	1	1	1	1	1	1	1	1	1	1	1	1	1	1	1	1	1	1	1	1	1	1	1	1	1	1	1	1	1	1	1	1	1	1
6-Hydroxy-5-methoxyindole glucuronide	1	1	1	1	1	1	1	1	1	1	1	1	1	1	1	1	1	1	1	1	1	1	1	1	1	1	1	1	1	1	1	1	1	1	1	1	1	1	1	1	1	1	1	1	1	1	1	1	1
5-Hydroxy-6-methoxyindole glucuronide	1	1	1	1	1	1	1	1	1	1	1	1	1	1	1	1	1	1	1	1	1	1	1	1	1	1	1	1	1	1	1	1	1	1	1	1	1	1	1	1	1	1	1	1	1	1	1	1	1
Rosmarinic acid	1	1	1	1	1	1	1	1	1	1	1	1	1	1	1	1	1	1	1	1	1	1	1	1	1	1	1	1	1	1	1	1	1	1	1	1	1	1	1	1	1	1	1	1	1	1	1	1	1
Succinyladenosine	2341430	2258355	2217931	4493473	4437635	4480431	4490814	4459537	4462582	3669651	3648337	3599884	2923452	2926547	2895594	2512253	2719071	2514661	3549937	3533763	3506553	9205462	10172926	7450018	2961696	2866650	2843231	4754704	4794389	4710659	3777154	3793741	3820129	3748943	3672376	3526010	3760223	3836231	3832177	4599484	4867938	4879879	5960556	3478692	3395974	4989721	5147002	5155120	1978769
5-(3',4'-Dihydroxyphenyl)-gamma-valerolactone-4'-O-glucuronide	24783	1	27133	65174	68313	68046	80276	72530	89818	83871	342929	269208	136506	84176	119555	108614	77414	49306	48235	48372	68427	251291	350411	99935	30927	36943	52895	75488	105015	98055	86361	53770	41170	46397	39131	37033	46052	48528	46813	98235	74396	71428	101184	38943	35136	84915	72775	81229	31552
Phosphatidylserine	1	1	1	1	1	1	1	1	1	1	1	1	1	1	1	1	1	1	1	1	1	1	1	1	1	1	1	1	1	1	1	1	1	1	1	1	1	1	1	1	1	1	1	1	1	1	1	1	1
Dolichyl diphosphate	1	1	1	1	1	1	1	1	1	1	1	1	1	1	1	1	1	1	1	1	1	1	1	1	1	1	1	1	1	1	1	1	1	1	1	1	1	1	1	1	1	1	1	1	1	1	1	1	1
cis-5-Tetradecenoylcarnitine	1	1	1	1	1	1	1	1	1	1	1	1	1	1	1	1	1	1	1	1	1	1	1	1	1	1	1	1	1	1	1	1	1	1	1	1	1	1	269053	1	1	1	279208	266383	270495	1	1	1	1
MG(0:0/i-20:0/0:0)	1	1	1	1	1	1	1	1	1	1	1	1	1	1	1	1	1	1	1	1	1	1	1	1	1	1	1	1	1	1	1	1	1	1	1	1	1	1	1	1	1	1	1	1	1	1	1	1	1
DG(18:0e/2:0/0:0)	1	1	1	1	1	1	1	1	1	1	1	1	1	1	1	1	1	1	1	1	1	1	1	1	1	1	1	1	1	1	1	1	1	1	1	1	1	1	1	1	1	1	1	1	1	1	1	1	1
MG(20:0/0:0/0:0)	1	1	1	1	1	1	1	1	1	1	1	1	1	1	1	1	1	1	1	1	1	1	1	1	1	1	1	1	1	1	1	1	1	1	1	1	1	1	1	1	1	1	1	1	1	1	1	1	1
MG(0:0/20:0/0:0)	1	1	1	1	1	1	1	1	1	1	1	1	1	1	1	1	1	1	1	1	1	1	1	1	1	1	1	1	1	1	1	1	1	1	1	1	1	1	1	1	1	1	1	1	1	1	1	1	1
MG(i-20:0/0:0/0:0)	1	1	1	1	1	1	1	1	1	1	1	1	1	1	1	1	1	1	1	1	1	1	1	1	1	1	1	1	1	1	1	1	1	1	1	1	1	1	1	1	1	1	1	1	1	1	1	1	1
25-Azacholesterol	745836	784559	760655	949677	1070911	1079210	959417	966614	971753	1726742	1767081	1769802	1110016	1147718	1115813	1709105	1692182	1667147	1129473	1083889	1141126	1230443	1160526	1180992	1363251	1386977	1373062	1464303	1322188	1441021	491836	509845	549119	1694095	1634605	1649646	1098935	1179944	1230314	1488421	1367178	1483198	1691448	1588586	1664344	1361714	1373663	1318844	1766430
4-O-alpha-D-Galactopyranuronosyl-D-galacturonic acid	1	1	1	1	1	1	1	1	1	1	1	1	1	1	1	1	1	1	1	1	1	1	1	1	1	1	1	1	1	1	1	1	1	1	1	1	1	1	1	1	1	1	1	1	1	1	1	1	1
Androsterone sulfate	1	1	1	1	1	1	1	1	1	1	1	1	1	1	1	1	1	1	1	1	1	1	1	1	1	1	1	1	1	1	1	1	1	1	1	1	1	1	1	1	1	1	1	1	1	1	1	1	1
5a-Dihydrotestosterone sulfate	1	1	1	1	1	1	1	1	1	1	1	1	1	1	1	1	1	1	1	1	1	1	1	1	1	1	1	1	1	1	1	1	1	1	1	1	1	1	1	1	1	1	1	1	1	1	1	1	1
Epiandrosterone sulfate	1	1	1	1	1	1	1	1	1	1	1	1	1	1	1	1	1	1	1	1	1	1	1	1	1	1	1	1	1	1	1	1	1	1	1	1	1	1	1	1	1	1	1	1	1	1	1	1	1
O-Tetradecanoylcarnitine	1	1	1	1	1	1	1	1	1	1	1	1	1	1	1	1	1	1	1	1	1	1	1	1	1	1	1	1	1	1	1	1	1	1	1	1	1	1	1	1	1	1	159790	155926	164599	1	1	1	1
Tetradecanoylcarnitine	1	1	1	1	1	1	1	1	1	1	1	1	1	1	1	1	1	1	1	1	1	1	1	1	1	1	1	1	1	1	1	1	1	1	1	1	1	1	1	1	1	1	159790	155926	164599	1	1	1	1
MG(20:4(5Z,8Z,11Z,14Z)/0:0/0:0)	232801	220105	222814	1242169	244806	241168	234359	232998	238887	187637	132232	143789	502391	168955	171058	230961	237359	240467	271374	259522	273308	245111	190488	184890	257458	193304	208614	212410	1020182	266755	272597	289430	228885	213045	208476	220575	1398537	278626	214172	207842	615196	261302	311796	309185	315708	202563	209100	402185	199063
MG(20:4(8Z,11Z,14Z,17Z)/0:0/0:0)	232801	220105	222814	1242169	244806	241168	234359	232998	238887	187637	132232	143789	502391	168955	171058	230961	237359	240467	271374	259522	273308	245111	190488	184890	257458	193304	208614	212410	1020182	266755	272597	289430	228885	213045	208476	220575	1398537	278626	214172	207842	615196	261302	311796	309185	315708	202563	209100	402185	199063
MG(0:0/20:4(8Z,11Z,14Z,17Z)/0:0)	232801	220105	222814	1242169	244806	241168	234359	232998	238887	187637	132232	143789	502391	168955	171058	230961	237359	240467	271374	259522	273308	245111	190488	184890	257458	193304	208614	212410	1020182	266755	272597	289430	228885	213045	208476	220575	1398537	278626	214172	207842	615196	261302	311796	309185	315708	202563	209100	402185	199063
2-Arachidonylglycerol	232801	220105	222814	1242169	244806	241168	234359	232998	238887	187637	132232	143789	502391	168955	171058	230961	237359	240467	271374	259522	273308	245111	190488	184890	257458	193304	208614	212410	1020182	266755	272597	289430	228885	213045	208476	220575	1398537	278626	214172	207842	615196	261302	311796	309185	315708	202563	209100	402185	199063
Leukotriene B4 ethanolamide	1	1	1	1	1	1	1	1	1	1	1	1	1	1	1	1	1	1	1	1	1	1	1	1	1	1	1	1	1	1	1	1	1	1	1	1	1	1	1	1	1	1	1	1	1	1	1	1	1
4-Phosphopantothenoylcysteine	1	1	1	1	1	1	1	1	1	1	1	1	1	1	1	1	1	1	1	1	1	1	1	1	1	1	1	1	1	1	1	1	1	1	1	1	1	1	1	1	1	1	1	1	1	1	1	1	1
NNAL-N-glucuronide	1	1	1	1	1	1	1	1	1	1	1	1	1	1	1	1	1	1	1	1	1	1	1	1	1	1	1	1	1	1	1	1	1	1	1	1	1	1	1	1	1	1	1	1	1	1	1	1	1
Geranylgeranylcysteine	1	1	1	1	1	1	1	1	1	1	1	1	1	1	1	1	1	1	1	1	1	1	1	1	1	1	1	1	1	1	1	1	1	1	1	1	1	1	1	1	1	1	1	1	1	1	1	1	1
CPA(16:0/0:0)	1	1	1	1	1	1	1	1	1	1	1	1	1	1	1	1	1	1	1	1	1	1	1	1	1	1	1	1	1	1	1	1	1	1	1	1	1	1	1	1	1	1	1	1	1	44505	39473	40011	1
3-Oxo-4,6-choladienoic acid	1	1	1	1	1	1	1	1	1	1	1	1	1	1	1	1	1	1	1	1	1	1	1	1	1	1	1	1	1	1	1	1	1	1	1	1	1	1	1	1	1	1	1	1	1	44505	39473	40011	1
(9Z,12Z)-3-Hydroxyhexadecadienoylcarnitine	1	1	1	1	1	1	1	1	1	1	1	1	1	1	1	1	1	1	1	1	1	1	1	1	1	1	1	1	1	1	1	1	1	1	1	1	1	1	1	1	1	1	622353	627923	629952	1	1	1	1
3-Hydroxyhexadecadienoylcarnitine	1	1	1	1	1	1	1	1	1	1	1	1	1	1	1	1	1	1	1	1	1	1	1	1	1	1	1	1	1	1	1	1	1	1	1	1	1	1	1	1	1	1	622353	627923	629952	1	1	1	1
3-Hydroxy-9-hexadecenoylcarnitine	1	1	1	1	1	1	1	1	1	1	1	1	1	1	1	1	1	1	1	1	1	1	1	1	1	1	1	1	1	1	1	1	1	1	1	1	1	1	1	1	1	1	1	1	1	1	1	1	1
(7Z,10Z)-Hexadecadienoylcarnitine	1	1	1	1	1	1	1	1	1	1	1	1	1	1	1	1	1	1	1	1	1	1	1	1	1	1	1	1	1	1	1	1	1	1	1	1	1	1	1	1	1	1	1	1	1	1	1	1	1
trans-Hexadec-2-enoyl carnitine	1	1	1	1	1	1	1	1	1	1	1	1	1	1	1	1	1	1	1	1	1	1	1	1	1	1	1	1	1	1	1	1	1	1	1	1	1	1	1	1	1	1	1	1	1	1	1	1	1
3-Hydroxyhexadecanoylcarnitine	1	1	1	1	1	1	1	1	1	1	1	1	1	1	1	1	1	1	1	1	1	1	1	1	1	1	1	1	1	1	1	1	1	1	1	1	1	1	1	1	1	1	1	1	1	1	1	1	1
Chitobiose	1	1	1	1	1	1	1	1	1	1	1	1	1	1	1	1	1	1	1	1	1	1	1	1	1	1	1	1	1	1	1	1	1	1	1	1	1	1	1	1	1	1	1	1	1	1	1	1	1
Alpha-Tocotrienol	1	1	1	1	1	1	1	1	1	1	1	1	1	1	1	1	1	1	1	1	1	1	1	1	1	1	1	1	1	1	1	1	1	1	1	1	1	1	1	1	1	1	1	1	1	1	1	1	1
4a-Formyl-5a-cholesta-8,24-dien-3b-ol	1	1	1	1	1	1	1	1	1	1	1	1	1	1	1	1	1	1	1	1	1	1	1	1	1	1	1	1	1	1	1	1	1	1	1	1	1	1	1	1	1	1	1	1	1	1	1	1	1
Ercalcitriol	1	1	1	1	1	1	1	1	1	1	1	1	1	1	1	1	1	1	1	1	1	1	1	1	1	1	1	1	1	1	1	1	1	1	1	1	1	1	1	1	1	1	1	1	1	1	1	1	1
25-Hydroxyvitamin D2	1	1	1	1	1	1	1	1	1	1	1	1	1	1	1	1	1	1	1	1	1	1	1	1	1	1	1	1	1	1	1	1	1	1	1	1	1	1	1	1	1	1	1	1	1	1	1	1	1
4alpha-carboxy-5alpha-cholesta-8-en-3beta-ol	1	1	1	1	1	1	1	1	1	1	1	1	1	1	1	1	1	1	1	1	1	1	1	1	1	1	1	1	1	1	1	1	1	1	1	1	1	1	1	1	1	1	1	1	1	1	1	1	1
LysoPC(10:0)	5786614	5694527	1	1	1	1	1	5979239	1	5210074	5584223	5517387	5655998	5727000	5821307	5526269	5438095	5458204	6027471	5995435	1	6125001	5946258	6176447	6140890	6021651	1	1	1	6210450	6632301	6445536	1	1	6508396	6548242	1	1	1	6562599	1	6740738	1	6730473	6850819	1	5906363	1	6790967
Dextrorphan O-glucuronide	3361870	3373571	3333875	3517124	3572575	3679610	3142836	2946758	2940141	2558975	2629678	2214842	2630257	3062087	2811181	1864413	2077352	2076600	2457091	2496184	2621422	3011050	3084063	3123108	3536233	3614968	3437242	3282095	3226083	3136971	2516289	2485156	2469033	2269930	2360957	2252412	3809699	3682734	3950104	2383653	2551863	2618510	3025588	3047336	2975136	2892834	2727323	2745863	3405208
Palmitoyl glucuronide	451807	440973	415210	1	400995	431988	438364	423263	445000	355250	379621	369617	1	385320	390836	360040	352311	347869	438180	410392	492242	473657	433418	476888	415029	415628	414944	470166	1	466419	455938	486612	500309	505011	498060	496550	1	488055	528682	521614	465458	533710	564056	519296	554755	448884	449614	430925	559965
Stearidonyl carnitine	1	1	1	1	1	1	1	1	1	1	1	1	1	1	1	1	1	1	1	1	1	1	1	1	1	1	1	1	1	1	1	1	1	1	1	1	1	1	1	1	1	1	1	1	1	1	1	1	1
LysoPE(0:0/15:0)	1	1	1	1	1	1	1	1	1	1	1	1	1	1	1	1	1	1	1	1	1	1	1	1	1	1	1	1	1	1	1	1	1	1	1	1	1	1	1	1	1	1	1	1	1	33391	32932	33212	1
LysoPE(15:0/0:0)	1	1	1	1	1	1	1	1	1	1	1	1	1	1	1	1	1	1	1	1	1	1	1	1	1	1	1	1	1	1	1	1	1	1	1	1	1	1	1	1	1	1	1	1	1	33391	32932	33212	1
O-Linoleoylcarnitine	1	1	1	1	1	1	1	1	1	1	1	1	1	1	1	1	1	1	1	1	1	1	1	1	1	1	1	1	1	1	1	1	1	1	1	1	1	1	1	1	1	1	1	1	1	1	1	1	1
Linoelaidylcarnitine	1	1	1	1	1	1	1	1	1	1	1	1	1	1	1	1	1	1	1	1	1	1	1	1	1	1	1	1	1	1	1	1	1	1	1	1	1	1	1	1	1	1	1	1	1	1	1	1	1
Linoleyl carnitine	1	1	1	1	1	1	1	1	1	1	1	1	1	1	1	1	1	1	1	1	1	1	1	1	1	1	1	1	1	1	1	1	1	1	1	1	1	1	1	1	1	1	1	1	1	1	1	1	1
3-Hydroxy-9Z-octadecenoylcarnitine	1	1	1	1	1	1	1	1	1	1	1	1	1	1	1	1	1	1	1	1	1	1	1	1	1	1	1	1	1	1	1	1	1	1	1	1	1	1	1	1	1	1	1	1	1	1	1	1	1
Lys-Asp-Tyr	1	1	1	1	1	1	1	1	1	1	1	1	1	1	1	1	1	1	1	1	1	947067	924565	915863	1	1	1	1	1	1	1	1	1	1	1	1	1	1	1	1	1	1	1	1	1	1	1	1	1
2-Hydroxyhexadecanoylcarnitine	1	1	1	1	1	1	1	1	1	1	1	1	1	1	1	1	1	1	1	1	1	1	1	1	1	1	1	1	1	1	1	1	1	1	1	1	1	1	1	1	1	1	1	1	1	1	1	1	1
12-Hydroxy-12-octadecanoylcarnitine	1	1	1	1	1	1	1	1	1	1	1	1	1	1	1	1	1	1	1	1	1	1	1	1	1	1	1	1	1	1	1	1	1	1	1	1	1	1	1	1	1	1	1	1	1	1	1	1	1
Urolithin A-8-O-glucuronide	1	1	1	1	1	1	1	1	1	1	1	1	1	1	1	1	1	1	1	1	1	1	1	1	1	1	1	1	1	1	1	1	1	1	1	1	1	1	1	1	1	1	1	1	1	1	1	1	1
Sucrose-6-Phosphate	1	1	1	1	1	1	1	1	1	1	1	1	1	1	1	1	1	1	1	1	1	1	1	1	1	1	1	1	1	1	1	1	1	1	1	1	1	1	1	1	1	1	1	1	1	1	1	1	1
Lactose 6-phosphate	1	1	1	1	1	1	1	1	1	1	1	1	1	1	1	1	1	1	1	1	1	1	1	1	1	1	1	1	1	1	1	1	1	1	1	1	1	1	1	1	1	1	1	1	1	1	1	1	1
Urolithin A-3-O-glucuronide	1	1	1	1	1	1	1	1	1	1	1	1	1	1	1	1	1	1	1	1	1	1	1	1	1	1	1	1	1	1	1	1	1	1	1	1	1	1	1	1	1	1	1	1	1	1	1	1	1
Trehalose 6-phosphate	1	1	1	1	1	1	1	1	1	1	1	1	1	1	1	1	1	1	1	1	1	1	1	1	1	1	1	1	1	1	1	1	1	1	1	1	1	1	1	1	1	1	1	1	1	1	1	1	1
Celastrol	1	1	1	1	1	1	1	1	1	1	1	1	1	1	1	1	1	1	1	1	1	1	1	1	1	1	1	1	1	1	1	1	1	1	1	1	1	1	1	1	1	1	1	1	1	961136	1	1	1
Lithocholic acid glycine conjugate	1	1	1	1	1	1	1	1	1	1	1	1	1	1	1	1	1	1	1	1	1	1	1	1	1	1	1	1	1	1	1	1	1	1	1	1	1	1	1	1	1	1	1	1	1	1	1	1	1
LPA(18:2(9Z,12Z)/0:0)	1	1	1	1	1	1	1	1	1	1	1	1	1	1	1	1	1	1	1	1	1	1	1	1	1	1	1	1	1	1	1	1	1	1	1	1	1	1	1	1	1	1	1	1	1	95036	96587	92642	1
LysoPA(0:0/18:2(9Z,12Z))	1	1	1	1	1	1	1	1	1	1	1	1	1	1	1	1	1	1	1	1	1	1	1	1	1	1	1	1	1	1	1	1	1	1	1	1	1	1	1	1	1	1	1	1	1	95036	96587	92642	1
LPA(0:0/18:2(9Z,12Z))	1	1	1	1	1	1	1	1	1	1	1	1	1	1	1	1	1	1	1	1	1	1	1	1	1	1	1	1	1	1	1	1	1	1	1	1	1	1	1	1	1	1	1	1	1	95036	96587	92642	1
3a,7a-Dihydroxycoprostanic acid	1	1	1	1	1	1	1	1	1	1	1	1	1	1	1	1	1	1	1	1	1	1	1	1	1	1	1	1	1	1	1	1	1	1	1	1	1	1	1	1	1	1	1	1	1	1	1	1	1
3a,7a,12a-Trihydroxy-5b-cholestan-26-al	1	1	1	1	1	1	1	1	1	1	1	1	1	1	1	1	1	1	1	1	1	1	1	1	1	1	1	1	1	1	1	1	1	1	1	1	1	1	1	1	1	1	1	1	1	1	1	1	1
5a-Cholestane-3a,7a,12a,23,25-pentol	1	1	1	1	1	1	1	1	1	1	1	1	1	1	1	1	1	1	1	1	1	1	1	1	1	1	1	1	1	1	1	1	1	1	1	1	1	1	1	1	1	1	1	1	1	1	1	1	1
5b-Cholestane-3a,7a,12a,24,25-pentol	1	1	1	1	1	1	1	1	1	1	1	1	1	1	1	1	1	1	1	1	1	1	1	1	1	1	1	1	1	1	1	1	1	1	1	1	1	1	1	1	1	1	1	1	1	1	1	1	1
5b-Cholestane-3a,7a,12a,25,26-pentol	1	1	1	1	1	1	1	1	1	1	1	1	1	1	1	1	1	1	1	1	1	1	1	1	1	1	1	1	1	1	1	1	1	1	1	1	1	1	1	1	1	1	1	1	1	1	1	1	1
Cholestane-3,7,12,24,25-pentol	1	1	1	1	1	1	1	1	1	1	1	1	1	1	1	1	1	1	1	1	1	1	1	1	1	1	1	1	1	1	1	1	1	1	1	1	1	1	1	1	1	1	1	1	1	1	1	1	1
5b-Cholestane-3a,7a,12a,23R,25-pentol	1	1	1	1	1	1	1	1	1	1	1	1	1	1	1	1	1	1	1	1	1	1	1	1	1	1	1	1	1	1	1	1	1	1	1	1	1	1	1	1	1	1	1	1	1	1	1	1	1
5b-Cholestane-3a,7a,12a,23S,25-pentol	1	1	1	1	1	1	1	1	1	1	1	1	1	1	1	1	1	1	1	1	1	1	1	1	1	1	1	1	1	1	1	1	1	1	1	1	1	1	1	1	1	1	1	1	1	1	1	1	1
MG(22:1(13Z)/0:0/0:0)	1	1	1	1	1	1	1	1	1	1	1	1	1	1	1	1	1	1	1	1	1	1	1	1	1	1	1	1	1	1	1	1	1	1	1	1	1	1	1	1	1	1	1	1	1	1	1	1	1
MG(0:0/22:1(13Z)/0:0)	1	1	1	1	1	1	1	1	1	1	1	1	1	1	1	1	1	1	1	1	1	1	1	1	1	1	1	1	1	1	1	1	1	1	1	1	1	1	1	1	1	1	1	1	1	1	1	1	1
Demethylphylloquinone	1	1	1	1	1	1	1	1	1	1	1	1	1	1	1	1	1	1	1	1	1	1	1	1	1	1	1	1	1	1	1	1	1	1	1	1	1	1	1	1	1	1	1	1	1	1	1	1	1
alpha-CEHC glucuronide	1289984	1303613	1303268	1237548	1180310	1194594	1135559	1102699	1115285	777128	791673	787202	1098367	1098159	1146053	713033	720449	747198	1051858	1015080	1036709	1083884	1031712	1071755	1392217	1360078	1392216	1212539	1239274	1246170	986906	961594	942257	893855	904487	904259	1587889	1515291	1550651	991770	983513	1024172	1171159	1153675	1184978	1187662	1160023	1156821	1303754
27-Nor-5b-cholestane-3a,7a,12a,24,25-pentol	1	1	1	1	1	1	1	1	1	1	1	1	1	1	1	1	1	1	1	1	1	1	1	1	1	1	1	1	1	1	1	1	1	1	1	1	1	1	1	1	1	1	1	1	1	1	1	1	1
4,4-Dimethyl-14a-formyl-5a-cholesta-8,24-dien-3b-ol	1	1	1	1	1	1	1	1	1	1	1	1	1	1	1	1	1	1	1	1	1	1	1	1	1	1	1	1	1	1	1	1	1	1	1	1	1	1	1	1	1	1	1	1	1	1	1	1	1
Stigmastanol	1	1	1	1	1	1	1	1	1	1	1	1	1	1	1	1	1	1	1	1	1	1	1	1	1	1	1	1	1	1	1	1	1	1	1	1	1	1	1	1	1	1	1	1	1	1	1	1	1
(24R)-Cholest-5-ene-3-beta,7-alpha,24-triol	1	1	1	1	1	1	1	1	1	1	1	1	1	1	1	1	1	1	1	1	1	1	1	1	1	1	1	1	1	1	1	1	1	1	1	1	1	1	1	1	1	1	1	1	1	1	1	1	1
4a-Methylzymosterol-4-carboxylic acid	1	1	1	1	1	1	1	1	1	1	1	1	1	1	1	1	1	1	1	1	1	1	1	1	1	1	1	1	1	1	1	1	1	1	1	1	1	1	1	1	1	1	1	1	1	1	1	1	1
Chenodeoxyglycocholic acid	1	1	1	1	1	1	1	1	1	1083365	1132634	1137050	1	1	1	1090450	1078889	1053672	1	1	1	1	1	1	1	1	1	1	1	1	1	1	1	1	1	1	1	1	1	1	1	1	1	1	1	1	1	1	1
Deoxycholic acid glycine conjugate	1	1	1	1	1	1	1	1	1	1083365	1132634	1137050	1	1	1	1090450	1078889	1053672	1	1	1	1	1	1	1	1	1	1	1	1	1	1	1	1	1	1	1	1	1	1	1	1	1	1	1	1	1	1	1
Glycoursodeoxycholic acid	1	1	1	1	1	1	1	1	1	1083365	1132634	1137050	1	1	1	1090450	1078889	1053672	1	1	1	1	1	1	1	1	1	1	1	1	1	1	1	1	1	1	1	1	1	1	1	1	1	1	1	1	1	1	1
Chenodeoxycholic acid glycine conjugate	1	1	1	1	1	1	1	1	1	1083365	1132634	1137050	1	1	1	1090450	1078889	1053672	1	1	1	1	1	1	1	1	1	1	1	1	1	1	1	1	1	1	1	1	1	1	1	1	1	1	1	1	1	1	1
Cholesterol sulfate	1	1	1	1	1	1	1	1	1	1083365	1132634	1137050	1	1	1	1	1078951	1053672	1	1	1	1	1	1	1	1	1	1	1	1	1	1	1	1	1	1	1	1	1	1	1	1	1	1	1	1	1	1	1
5alpha-Androstan-3alpha,17beta-diol disulfate	379566	395703	392904	296486	1	288948	279848	263641	266467	1	1	1	1	1	1	1	1	1	316789	308016	320697	277161	1	265833	474505	459006	456761	335533	350426	351431	270241	1	1	1	1	1	483354	439700	460972	281155	299406	312442	345045	339215	340053	390631	368110	385993	408211
Maslinic acid	1	1	1	1	1	1	1	1	1	1	1	1	1	1	1	1	1	1	1	1	1	1	1	1	1	1	1	1	1	1	1	1	1	1	1	1	1	1	1	1	1	1	1	1	1	1	1	1	1
Oleanolic acid	1	1	1	1	1	1	69847	73840	75410	1	1	1	1	1	1	1	1	1	1	1	1	1	1	1	1	84652	1	1	1	1	1	1	1	1	1	1	1	1	1	118235	106452	117469	1	1	1	1	102489	97560	1
Boswellic acid	1	1	1	1	1	1	69847	73840	75410	1	1	1	1	1	1	1	1	1	1	1	1	1	1	1	1	84652	1	1	1	1	1	1	1	1	1	1	1	1	1	118235	106452	117469	1	1	1	1	102489	97560	1
Ursolic acid	1	1	1	1	1	1	69847	73840	75410	1	1	1	1	1	1	1	1	1	1	1	1	1	1	1	1	84652	1	1	1	1	1	1	1	1	1	1	1	1	1	118235	106452	117469	1	1	1	1	102489	97560	1
5b-Cholestane-3a,7a,12a,23-Tetrol	1	1	1	1	1	1	1	1	1	1	1	1	1	1	1	1	1	1	1	1	1	1	1	1	1	1	1	1	1	1	1	1	1	1	1	1	1	1	1	1	1	1	1	1	1	1	1	1	1
Retinyl beta-glucuronide	1	1	1	1	1	1	1	1	1	1	1	1	1	1	1	1	1	1	1	1	1	1	1	1	1	1	1	1	1	1	1	1	1	1	1	1	1	1	1	1	1	1	1	1	1	33391	27560	21235	1
Cortisol 21-sulfate	1	1	1	1	1	1	1	1	1	1	1	1	1	1	1	1	1	1	1	1	1	1	1	1	1	1	1	1	1	1	1	1	1	1	1	1	138884	1	152907	1	1	1	1	1	1	1	1	1	1
Glycocholic acid	1	1	1	1	1	1	1	1	1	1	232311	250184	1	1	1	1	322227	316542	1	1	1	1	1	1	1	1	1	1	1	1	1	1	1	1	1	1	1	1	1	1	1	1	1	1	1	1	1	1	1
3a,7b,12a-Trihydroxyoxocholanyl-Glycine	1	1	1	1	1	1	1	1	1	1	232311	250184	1	1	1	960115	322227	316542	1	1	1	1	1	1	1	1	1	1	1	1	1	1	1	1	1	1	1	1	1	1	1	1	1	1	1	1	1	1	1
17-hydroxyandrostane-3-glucuronide	1	1	1	1	1	1	1	1	1	1	1	1	1	1	1	1	1	1	1	1	1	1	1	1	1	1	1	1	1	1	1	1	1	1	1	1	1	1	1	1	1	1	1	1	1	199460	195102	182218	1
3-alpha-androstanediol glucuronide	1	1	1	1	1	1	1	1	1	1	1	1	1	1	1	1	1	1	1	1	1	1	1	1	1	1	1	1	1	1	1	1	1	1	1	1	1	1	1	1	1	1	1	1	1	199460	195102	182218	1
3,17-Androstanediol glucuronide	1	1	1	1	1	1	1	1	1	1	1	1	1	1	1	1	1	1	1	1	1	1	1	1	1	1	1	1	1	1	1	1	1	1	1	1	1	1	1	1	1	1	1	1	1	199460	195102	182218	1
Glycyrrhetinic acid	1	1	1	1	1	1	1	1	1	1	1	1	1	1	1	1	1	1	1	1	1	1	1	1	1	1	1	1	1	1	1	1	1	1	1	1	1	1	1	1	1	1	1	1	1	1	1	1	1
2',3'-Dihydro-phytomenadione	1	1	1	1	1	1	1	1	1	1	1	1	1	1	1	1	1	1	1	1	1	1	1	1	1	1	1	1	1	1	1	1	1	1	1	1	1	1	1	1	1	1	1	1	1	1	1	1	1
7,11-Dioxolanost-8-en-3-yl acetate	1	1	1	1	1	1	1	1	1	27670	80076	118618	1	1	1	111359	102160	40181	1	1	1	1	1	1	1	1	1	1	1	1	1	1	1	1	1	1	1	1	1	1	1	1	1	1	1	1	1	1	1
LysoPE(0:0/20:5(5Z,8Z,11Z,14Z,17Z))	1	1	1	1	1	1	1	1	1	1	1	1	1	1	1	1	1	1	1	1	1	1	1	1	1	1	1	1	1	1	1	1	1	1	1	1	1	1	1	1	1	1	1	1	1	98358	98996	94988	1
LysoPE(20:5(5Z,8Z,11Z,14Z,17Z)/0:0)	1	1	1	1	1	1	1	1	1	1	1	1	1	1	1	1	1	1	1	1	1	1	1	1	1	1	1	1	1	1	1	1	1	1	1	1	1	1	1	1	1	1	1	1	1	98358	98996	94988	1
Neuromedin N (1-4)	1	1	1	1	1	1	1	1	1	1	1	1	1	1	1	1	1	1	1	1	1	1	1	1	1	1	1	1	1	1	1	1	1	1	1	1	1	1	1	1	1	1	1	1	1	557414	557002	1	1
PA(20:4(5Z,8Z,11Z,14Z)e/2:0)	1	1	1	1	1	1	1	1	1	1	1	1	1	1	1	1	1	1	1	1	1	1	1	1	1	1	1	1	1	1	1	1	1	1	1	1	1	1	1	1	1	1	1	1	1	573489	567481	1	1
DG(14:1(9Z)/14:1(9Z)/0:0)	1	1	1	1	1	1	1	1	1	1	1	1	1	1	1	1	1	1	1	1	1	1	1	1	1	1	1	1	1	1	1	1	1	1	1	1	1	1	1	1	1	1	1	1	1	1	1	1	1
DG(14:1n5/0:0/14:1n5)	1	1	1	1	1	1	1	1	1	1	1	1	1	1	1	1	1	1	1	1	1	1	1	1	1	1	1	1	1	1	1	1	1	1	1	1	1	1	1	1	1	1	1	1	1	1	1	1	1
DG(14:1(9Z)/14:0/0:0)	1	1	1	1	1	1	887360	876279	907836	1219084	1308128	1283654	1	1	1	2039475	1994672	1984164	1	1	1	1	1	1	1022791	1016472	1039132	1	1	1	1	1	1	1	1	1	1	1	1	879424	679532	845526	633790	626810	659958	1409199	1417272	1160733	1
DG(14:0/14:1(9Z)/0:0)	1	1	1	1	1	1	887360	876279	907836	1219084	1308128	1283654	1	1	1	2039475	1994672	1984164	1	1	1	1	1	1	1022791	1016472	1039132	1	1	1	1	1	1	1	1	1	1	1	1	879424	679532	845526	633790	626810	659958	1409199	1417272	1160733	1
DG(14:0/0:0/14:1n5)	1	1	1	1	1	1	887360	876279	907836	1219084	1308128	1283654	1	1	1	2039475	1994672	1984164	1	1	1	1	1	1	1022791	1016472	1039132	1	1	1	1	1	1	1	1	1	1	1	1	879424	679532	845526	633790	626810	659958	1409199	1417272	1160733	1
Adenylylselenate	1	1	1	1	1	1	1	1	1	1	1	1	1	1	1	1	1	1	1	1	1	1	1	1	1	1	1	1	1	1	1	1	1	1	1	1	1	1	1	1	1	1	1	1	1	1	101851	94334	1
LysoPC(16:1(9Z))	1	1	1	1	1	1	1	1	1	1	1	1	1	1	1	1	1	1	1	1	1	1	1	1	1	1	1	1	1	1	1	1	1	1	1	1	1	1	1	1	1	1	1	1	1	1	1	1	1
LysoPC(18:4(6Z,9Z,12Z,15Z))	1	1	1	1	1	1	1	1	1	1	1	1	1	1	1	1	1	1	1	1	1	1	1	1	1	1	1	1	1	1	1	1	1	1	1	1	1	1	1	1	1	1	1	1	1	1	1	1	1
LysoPE(0:0/20:4(8Z,11Z,14Z,17Z))	1	1	1	1	1	1	1	1	1	1	1	1	1	1	1	1	1	1	1	1	1	1	1	1	1	1	1	1	1	1	1	1	1	1	1	1	1	1	1	1	1	1	1	1	1	65263	82159	27840	1
LysoPE(20:4(8Z,11Z,14Z,17Z)/0:0)	1	1	1	1	1	1	1	1	1	1	1	1	1	1	1	1	1	1	1	1	1	1	1	1	1	1	1	1	1	1	1	1	1	1	1	1	1	1	1	1	1	1	1	1	1	65263	82159	27840	1
LysoPE(20:4(5Z,8Z,11Z,14Z)/0:0)	1	1	1	1	1	1	1	1	1	1	1	1	1	1	1	1	1	1	1	1	1	1	1	1	1	1	1	1	1	1	1	1	1	1	1	1	1	1	1	1	1	1	1	1	1	65263	82159	27840	1
LysoPE(0:0/20:4(5Z,8Z,11Z,14Z))	1	1	1	1	1	1	1	1	1	1	1	1	1	1	1	1	1	1	1	1	1	1	1	1	1	1	1	1	1	1	1	1	1	1	1	1	1	1	1	1	1	1	1	1	1	65263	82159	27840	1
DG(14:1(9Z)/15:0/0:0)	1	1	1	1	1	1	1	1	1	1	1	1	1	1	1	1	1	1	1	1	1	1	1	1	1	1	1	1	1	1	1	1	1	1	1	1	1	1	1	1	1	1	1	1	1	1	1	1	1
DG(15:0/14:1(9Z)/0:0)	1	1	1	1	1	1	1	1	1	1	1	1	1	1	1	1	1	1	1	1	1	1	1	1	1	1	1	1	1	1	1	1	1	1	1	1	1	1	1	1	1	1	1	1	1	1	1	1	1
DG(15:0/0:0/14:1n5)	1	1	1	1	1	1	1	1	1	1	1	1	1	1	1	1	1	1	1	1	1	1	1	1	1	1	1	1	1	1	1	1	1	1	1	1	1	1	1	1	1	1	1	1	1	1	1	1	1
LysoPE(0:0/20:0)	1	1	1	1	1	1	1	1	1	1	1	1	1	1	1	1	1	1	1	1	1	1	1	1	1	1	1	1	1	1	1	1	1	1	1	1	1	1	1	1	1	1	1	1	1	146091	140876	136257	1
LysoPE(20:0/0:0)	1	1	1	1	1	1	1	1	1	1	1	1	1	1	1	1	1	1	1	1	1	1	1	1	1	1	1	1	1	1	1	1	1	1	1	1	1	1	1	1	1	1	1	1	1	146091	140876	136257	1
LysoPC(17:0)	1	1	1	1	1	1	1	1	1	1	1	1	1	1	1	1	1	1	1	1	1	1	1	1	1	1	1	1	1	1	1	1	1	1	1	1	1	1	1	1	1	1	1	1	1	146091	140876	136257	1
Leu-Arg-Leu-Ile	1	1	1	1	1	1	1	1	1	1	1	1	1	1	1	1	1	1	1	1	1	1	1	1	1	1	1	1	1	1	1	1	1	1	1	1	1	1	1	1	1	1	1	1	1	1	1	1	1
DG(14:1n5/0:0/16:1n7)	1	1	1	1	1	1	230628	236947	238987	427227	473523	455861	1	1	1	579056	559319	559930	1	1	1	1	1	1	347151	365468	349189	1	1	1	1	1	1	1	1	1	1	1	1	346653	263124	340331	1	1	1	420381	431693	344381	1
DG(16:1(9Z)/14:1(9Z)/0:0)	1	1	1	1	1	1	230628	236947	238987	427227	473523	455861	1	1	1	579056	559319	559930	1	1	1	1	1	1	347151	365468	349189	1	1	1	1	1	1	1	1	1	1	1	1	346653	263124	340331	1	1	1	420381	431693	344381	1
DG(14:1(9Z)/16:1(9Z)/0:0)	1	1	1	1	1	1	230628	236947	238987	427227	473523	455861	1	1	1	579056	559319	559930	1	1	1	1	1	1	347151	365468	349189	1	1	1	1	1	1	1	1	1	1	1	1	346653	263124	340331	1	1	1	420381	431693	344381	1
DG(16:0/0:0/14:1n5)	1	1	1	476150	561591	564130	2610998	2591326	2600595	3614103	3795574	3795936	273988	290428	294186	4970183	4879237	4884938	1	1	1	346466	349682	339114	2665437	2715771	2677354	358851	278322	340097	1	1	1	560929	558641	568023	343519	404817	426718	2441561	2006722	2409126	1575832	1587354	1646957	3403013	3413769	2894219	578768
DG(14:0/16:1(9Z)/0:0)	1	1	1	476150	561591	564130	2610998	2591326	2600595	3614103	3795574	3795936	273988	290428	294186	4970183	4879237	4884938	1	1	1	346466	349682	339114	2665437	2715771	2677354	358851	278322	340097	1	1	1	560929	558641	568023	343519	404817	426718	2441561	2006722	2409126	1575832	1587354	1646957	3403013	3413769	2894219	578768
DG(16:1(9Z)/14:0/0:0)	1	1	1	476150	561591	564130	2610998	2591326	2600595	3614103	3795574	3795936	273988	290428	294186	4970183	4879237	4884938	1	1	1	346466	349682	339114	2665437	2715771	2677354	358851	278322	340097	1	1	1	560929	558641	568023	343519	404817	426718	2441561	2006722	2409126	1575832	1587354	1646957	3403013	3413769	2894219	578768
DG(16:0/14:1(9Z)/0:0)	1	1	1	476150	561591	564130	2610998	2591326	2600595	3614103	3795574	3795936	273988	290428	294186	4970183	4879237	4884938	1	1	1	346466	349682	339114	2665437	2715771	2677354	358851	278322	340097	1	1	1	560929	558641	568023	343519	404817	426718	2441561	2006722	2409126	1575832	1587354	1646957	3403013	3413769	2894219	578768
DG(14:0/0:0/16:1n7)	1	1	1	476150	561591	564130	2610998	2591326	2600595	3614103	3795574	3795936	273988	290428	294186	4970183	4879237	4884938	1	1	1	346466	349682	339114	2665437	2715771	2677354	358851	278322	340097	1	1	1	560929	558641	568023	343519	404817	426718	2441561	2006722	2409126	1575832	1587354	1646957	3403013	3413769	2894219	578768
DG(14:1(9Z)/16:0/0:0)	1	1	1	476150	561591	564130	2610998	2591326	2600595	3614103	3795574	3795936	273988	290428	294186	4970183	4879237	4884938	1	1	1	346466	349682	339114	2665437	2715771	2677354	358851	278322	340097	1	1	1	560929	558641	568023	343519	404817	426718	2441561	2006722	2409126	1575832	1587354	1646957	3403013	3413769	2894219	578768
TG(13:0/8:0/8:0)	1	1	1	1	1	1	1	1	1	1	1	1	1	1	1	1	1	1	1	1	1	1	1	1	1	1	1	1	1	1	1	1	1	1	1	1	1	1	1	1	1	1	1	1	1	1	1	1	1
TG(8:0/8:0/i-13:0)	1	1	1	1	1	1	1	1	1	1	1	1	1	1	1	1	1	1	1	1	1	1	1	1	1	1	1	1	1	1	1	1	1	1	1	1	1	1	1	1	1	1	1	1	1	1	1	1	1
TG(8:0/8:0/13:0)	1	1	1	1	1	1	1	1	1	1	1	1	1	1	1	1	1	1	1	1	1	1	1	1	1	1	1	1	1	1	1	1	1	1	1	1	1	1	1	1	1	1	1	1	1	1	1	1	1
TG(8:0/8:0/a-13:0)[rac]	1	1	1	1	1	1	1	1	1	1	1	1	1	1	1	1	1	1	1	1	1	1	1	1	1	1	1	1	1	1	1	1	1	1	1	1	1	1	1	1	1	1	1	1	1	1	1	1	1
TG(a-13:0/8:0/8:0)[rac]	1	1	1	1	1	1	1	1	1	1	1	1	1	1	1	1	1	1	1	1	1	1	1	1	1	1	1	1	1	1	1	1	1	1	1	1	1	1	1	1	1	1	1	1	1	1	1	1	1
TG(i-13:0/8:0/8:0)	1	1	1	1	1	1	1	1	1	1	1	1	1	1	1	1	1	1	1	1	1	1	1	1	1	1	1	1	1	1	1	1	1	1	1	1	1	1	1	1	1	1	1	1	1	1	1	1	1
Retinyl palmitate	1	1	1	1	1	1	1	1	1	1	1	1	1	1	1	546299	553565	561271	1	1	1	1	1	1	1	1	1	1	1	1	1	1	1	1	1	1	1	1	1	1	1	1	1	1	1	1	1	1	1
Cortolone-3-glucuronide	1	1	1	1	1	1	1	1	1	1	1	1	1	1	1	1	1	1	1	1	1	1	1	1	1	1	1	1	1	1	1	1	1	1	1	1	1	1	1	1	1	1	1	1	1	263528	243575	236525	1
LysoPE(0:0/22:5(4Z,7Z,10Z,13Z,16Z))	1	1	1	1	1	1	1	1	1	1	1	1	1	1	1	1	1	1	1	1	1	1	1	1	1	1	1	1	1	1	1	1	1	1	1	1	1	1	1	1	1	1	1	1	1	1	1	1	1
LysoPE(0:0/22:5(7Z,10Z,13Z,16Z,19Z))	1	1	1	1	1	1	1	1	1	1	1	1	1	1	1	1	1	1	1	1	1	1	1	1	1	1	1	1	1	1	1	1	1	1	1	1	1	1	1	1	1	1	1	1	1	1	1	1	1
LysoPE(22:5(7Z,10Z,13Z,16Z,19Z)/0:0)	1	1	1	1	1	1	1	1	1	1	1	1	1	1	1	1	1	1	1	1	1	1	1	1	1	1	1	1	1	1	1	1	1	1	1	1	1	1	1	1	1	1	1	1	1	1	1	1	1
LysoPE(22:5(4Z,7Z,10Z,13Z,16Z)/0:0)	1	1	1	1	1	1	1	1	1	1	1	1	1	1	1	1	1	1	1	1	1	1	1	1	1	1	1	1	1	1	1	1	1	1	1	1	1	1	1	1	1	1	1	1	1	1	1	1	1
VPGPR Enterostatin	1	1	1	1	1	1	1	1	1	1	1	1	1	1	1	1	1	1	1	1	1	1	1	1	1	1	1	1	1	1	1	1	1	1	1	1	1	1	1	1	1	1	1	1	1	94670	100780	82716	1
1-Stearoylglycerophosphoserine	1	1	1	1	1	1	1	1	1	1	1	1	1	1	1	1	1	1	1	1	1	1	1	1	1	1	1	1	1	1	1	1	1	1	1	1	1	1	1	1	1	1	1	1	1	94670	100780	82716	1
2-Hexaprenyl-6-methoxy-1,4-benzoquinol	1	1	1	1	1	1	1	1	65114	63259	74760	74370	1	1	1	87389	81780	80759	1	1	1	1	1	1	80980	89838	83333	1	1	1	1	1	1	1	1	1	1	1	1	92515	1	82585	159866	151838	160795	1	1	1	1
17-beta-estradiol 3-sulfate-17-(beta-D-glucuronide)	1	1	1	1	1	1	1	1	1	1	1	1	1	1	1	1	1	1	1	1	1	1	1	1	1	1	1	1	1	1	1	1	1	1	1	1	1	1	1	1	1	1	1	1	1	1	1	1	1
LysoPE(0:0/22:1(13Z))	87565	1	1	1	1	1	337832	1147526	428434	890192	913376	884501	1059514	1028217	1049234	865169	847865	863470	204988	461765	26501	1	1	34383	48521	27484	25249	74400	74169	164780	84824	121899	1	221262	111400	202575	77731	100976	1	640702	234329	252566	22157	45622	1	439054	697104	109110	89334
LysoPE(22:1(13Z)/0:0)	87565	25649	34394	104658	93141	37791	337832	1147526	428434	890192	913376	884501	1059514	1028217	1049234	865169	847865	863470	204988	461765	26501	1	1	34383	48521	27484	25249	74400	74169	164780	84824	121899	1	221262	111400	202575	77731	100976	1	640702	234329	252566	22157	45622	1	439054	697104	109110	89334
LysoPE(22:0/0:0)	2171125	2171183	2124007	1918604	1851535	1871012	1371173	1390083	1398837	1073635	1102544	1060241	1271991	1233982	1262266	1048792	1021939	1036224	1953910	1946728	2053978	1408488	1390951	1393713	1414256	1413080	1388573	1809700	1918684	1848441	1974657	2018975	2049078	1508166	1516765	1556219	2148528	2080506	2108370	1507098	1643766	1506812	2437233	2396947	2479215	1043755	1075017	1206092	1923298
LysoPE(0:0/22:0)	2171125	2171183	2124007	1918604	1851535	1871012	1371173	1390083	1398837	1073635	1102544	1060241	1271991	1233982	1262266	1048792	1021939	1036224	1953910	1946728	2053978	1408488	1390951	1393713	1414256	1413080	1388573	1809700	1918684	1848441	1974657	2018975	2049078	1508166	1516765	1556219	2148528	2080506	2108370	1507098	1643766	1506812	2437233	2396947	2479215	1043755	1075017	1206092	1923298
LysoPC(20:5(5Z,8Z,11Z,14Z,17Z))	1	1	1	1	1	1	1	1	1	1	1	1	1	1	1	1	1	1	1	1	1	1	1	1	1	1	1	1	1	1	1	1	1	1	1	1	1	1	1	1	1	1	1	1	1	371475	370658	333823	1
DG(14:1n5/0:0/18:4n3)	1	1	1	1	1	1	230628	236947	238987	427227	473523	455861	1	1	1	579056	559319	559930	1	1	1	1	1	1	347151	365468	349189	1	1	1	1	1	1	1	1	1	1	1	1	346653	263124	340331	1	1	1	420381	431693	344381	1
DG(14:1(9Z)/18:4(6Z,9Z,12Z,15Z)/0:0)	1	1	1	1	1	1	1	1	1	427227	473523	455861	1	1	1	579056	559319	559930	1	1	1	1	1	1	347151	365468	349189	1	1	1	1	1	1	1	1	1	1	1	1	346653	263124	340331	1	1	1	420381	431693	344381	1
DG(18:4(6Z,9Z,12Z,15Z)/14:1(9Z)/0:0)	1	1	1	1	1	1	1	1	1	427227	473523	455861	1	1	1	579056	559319	559930	1	1	1	1	1	1	347151	365468	349189	1	1	1	1	1	1	1	1	1	1	1	1	346653	263124	340331	1	1	1	420381	431693	344381	1
DG(14:1(9Z)/18:3(6Z,9Z,12Z)/0:0)	1	1	1	476150	561591	564130	2610998	2591326	2600595	3614103	3795574	3795936	273988	290428	294186	4970183	4879237	4884938	1	1	1	346466	349682	339114	2665437	2715771	2677354	358851	278322	340097	1	1	1	560929	558641	568023	343519	404817	426718	2441561	2006722	2409126	1575832	1587354	1646957	3403013	3413769	2894219	578768
DG(14:0/18:4(6Z,9Z,12Z,15Z)/0:0)	1	1	1	476150	561591	564130	2610998	2591326	2600595	3614103	3795574	3795936	273988	290428	294186	4970183	4879237	4884938	1	1	1	346466	349682	339114	2665437	2715771	2677354	358851	278322	340097	1	1	1	560929	558641	568023	343519	404817	426718	2441561	2006722	2409126	1575832	1587354	1646957	3403013	3413769	2894219	578768
DG(18:3(6Z,9Z,12Z)/14:1(9Z)/0:0)	1	1	1	476150	561591	564130	2610998	2591326	2600595	3614103	3795574	3795936	273988	290428	294186	4970183	4879237	4884938	1	1	1	346466	349682	339114	2665437	2715771	2677354	358851	278322	340097	1	1	1	560929	558641	568023	343519	404817	426718	2441561	2006722	2409126	1575832	1587354	1646957	3403013	3413769	2894219	578768
DG(18:3(9Z,12Z,15Z)/14:1(9Z)/0:0)	1	1	1	476150	561591	564130	2610998	2591326	2600595	3614103	3795574	3795936	273988	290428	294186	4970183	4879237	4884938	1	1	1	346466	349682	339114	2665437	2715771	2677354	358851	278322	340097	1	1	1	560929	558641	568023	343519	404817	426718	2441561	2006722	2409126	1575832	1587354	1646957	3403013	3413769	2894219	578768
DG(18:4(6Z,9Z,12Z,15Z)/14:0/0:0)	1	1	1	476150	561591	564130	2610998	2591326	2600595	3614103	3795574	3795936	273988	290428	294186	4970183	4879237	4884938	1	1	1	346466	349682	339114	2665437	2715771	2677354	358851	278322	340097	1	1	1	560929	558641	568023	343519	404817	426718	2441561	2006722	2409126	1575832	1587354	1646957	3403013	3413769	2894219	578768
DG(14:1(9Z)/18:3(9Z,12Z,15Z)/0:0)	1	1	1	476150	561591	564130	2610998	2591326	2600595	3614103	3795574	3795936	273988	290428	294186	4970183	4879237	4884938	1	1	1	346466	349682	339114	2665437	2715771	2677354	358851	278322	340097	1	1	1	560929	558641	568023	343519	404817	426718	2441561	2006722	2409126	1575832	1587354	1646957	3403013	3413769	2894219	578768
DG(14:1n5/0:0/18:3n6)	1	1	1	476150	561591	564130	2610998	2591326	2600595	3614103	3795574	3795936	273988	290428	294186	4970183	4879237	4884938	1	1	1	346466	349682	339114	2665437	2715771	2677354	358851	278322	340097	1	1	1	560929	558641	568023	343519	404817	426718	2441561	2006722	2409126	1575832	1587354	1646957	3403013	3413769	2894219	578768
DG(14:1n5/0:0/18:3n3)	1	1	1	476150	561591	564130	2610998	2591326	2600595	3614103	3795574	3795936	273988	290428	294186	4970183	4879237	4884938	1	1	1	346466	349682	339114	2665437	2715771	2677354	358851	278322	340097	1	1	1	560929	558641	568023	343519	404817	426718	2441561	2006722	2409126	1575832	1587354	1646957	3403013	3413769	2894219	578768
DG(14:0/0:0/18:4n3)	1	1	1	476150	561591	564130	2610998	2591326	2600595	3614103	3795574	3795936	273988	290428	294186	4970183	4879237	4884938	1	1	1	346466	349682	339114	2665437	2715771	2677354	358851	278322	340097	1	1	1	560929	558641	568023	343519	404817	426718	2441561	2006722	2409126	1575832	1587354	1646957	3403013	3413769	2894219	578768
CerP(d18:1/12:0)	1	1	1	1	1	1	1	1	1	1	1	1	1	1	1	1	1	1	1	1	1	1	1	1	1	1	1	1	1	1	1	1	1	1	1	1	1	1	1	1	1	1	1	1	1	1	1	1	1
DG(18:3(6Z,9Z,12Z)/14:0/0:0)	1	1	1	1	1	1	1	1	1	1	1	1	1	1	1	1	1	1	1	1	1	1	1	1	1	1	1	1	1	1	1	1	1	1	1	1	1	1	1	1	1	1	1	1	1	1	1	1	1
DG(18:3(9Z,12Z,15Z)/14:0/0:0)	1	1	1	1	1	1	1	1	1	1	1	1	1	1	1	1	1	1	1	1	1	1	1	1	1	1	1	1	1	1	1	1	1	1	1	1	1	1	1	1	1	1	1	1	1	1	1	1	1
DG(14:0/0:0/18:3n6)	1	1	1	1	1	1	1	1	1	1	1	1	1	1	1	1	1	1	1	1	1	1	1	1	1	1	1	1	1	1	1	1	1	1	1	1	1	1	1	1	1	1	1	1	1	1	1	1	1
DG(14:0/0:0/18:3n3)	1	1	1	1	1	1	1	1	1	1	1	1	1	1	1	1	1	1	1	1	1	1	1	1	1	1	1	1	1	1	1	1	1	1	1	1	1	1	1	1	1	1	1	1	1	1	1	1	1
DG(14:1(9Z)/18:2(9Z,12Z)/0:0)	1	1	1	1	1	1	1	1	1	1	1	1	1	1	1	1	1	1	1	1	1	1	1	1	1	1	1	1	1	1	1	1	1	1	1	1	1	1	1	1	1	1	1	1	1	1	1	1	1
DG(14:0/18:3(9Z,12Z,15Z)/0:0)	1	1	1	1	1	1	1	1	1	1	1	1	1	1	1	1	1	1	1	1	1	1	1	1	1	1	1	1	1	1	1	1	1	1	1	1	1	1	1	1	1	1	1	1	1	1	1	1	1
DG(18:2(9Z,12Z)/14:1(9Z)/0:0)	1	1	1	1	1	1	1	1	1	1	1	1	1	1	1	1	1	1	1	1	1	1	1	1	1	1	1	1	1	1	1	1	1	1	1	1	1	1	1	1	1	1	1	1	1	1	1	1	1
DG(14:0/18:3(6Z,9Z,12Z)/0:0)	1	1	1	1	1	1	1	1	1	1	1	1	1	1	1	1	1	1	1	1	1	1	1	1	1	1	1	1	1	1	1	1	1	1	1	1	1	1	1	1	1	1	1	1	1	1	1	1	1
2-Hexaprenyl-6-methoxy-1,4-benzoquinone	1	1	1	1	1	1	1	1	1	1	1	1	1	1	1	1	1	1	1	1	1	1	1	1	1	1	1	1	1	1	1	1	1	1	1	1	1	1	1	1	1	1	1	1	1	1	1	1	1
3-hexaprenyl-4-hydroxybenzoic acid	1	1	1	1	1	1	1	1	1	1	1	1	1	1	1	1	1	1	1	1	1	1	1	1	1	1	1	1	1	1	1	1	1	1	1	1	1	1	1	1	1	1	1	1	1	1	1	1	1
3'-hydroxy-e,e-caroten-3-one	1	1	1	1	1	1	1	1	1	1	1	1	1	1	1	1	1	1	1	1	1	1	1	1	1	1	1	1	1	1	1	1	1	1	1	1	1	1	1	1	1	1	1	1	1	1	1	1	1
3-Hydroxy-b,e-caroten-3'-one	1	1	1	1	1	1	1	1	1	1	1	1	1	1	1	1	1	1	1	1	1	1	1	1	1	1	1	1	1	1	1	1	1	1	1	1	1	1	1	1	1	1	1	1	1	1	1	1	1
DG(14:1(9Z)/18:1(11Z)/0:0)	1	1	1	113607	140646	141323	787492	799718	781235	1452371	1568693	1539967	1	1	1	1758388	1713105	1726042	1	1	1	79438	74184	78857	980590	1014962	986339	111108	1	107462	1	1	1	200410	204313	208834	1	147186	1	1105988	882243	1071349	532272	528857	548527	1078811	1091892	910205	172089
DG(18:1(9Z)/14:1(9Z)/0:0)	1	1	1	113607	140646	141323	787492	799718	781235	1452371	1568693	1539967	1	1	1	1758388	1713105	1726042	1	1	1	79438	74184	78857	980590	1014962	986339	111108	1	107462	1	1	1	200410	204313	208834	1	147186	1	1105988	882243	1071349	532272	528857	548527	1078811	1091892	910205	172089
DG(14:1(9Z)/18:1(9Z)/0:0)[iso2]	1	1	1	113607	140646	141323	787492	799718	781235	1452371	1568693	1539967	1	1	1	1758388	1713105	1726042	1	1	1	79438	74184	78857	980590	1014962	986339	111108	1	107462	1	1	1	200410	204313	208834	1	147186	1	1105988	882243	1071349	532272	528857	548527	1078811	1091892	910205	172089
DG(14:0/18:2(9Z,12Z)/0:0)	1	1	1	113607	140646	141323	787492	799718	781235	1452371	1568693	1539967	1	1	1	1758388	1713105	1726042	1	1	1	79438	74184	78857	980590	1014962	986339	111108	1	107462	1	1	1	200410	204313	208834	1	147186	1	1105988	882243	1071349	532272	528857	548527	1078811	1091892	910205	172089
DG(12:0/20:2(11Z,14Z)/0:0)[iso2]	1	1	1	113607	140646	141323	787492	799718	781235	1452371	1568693	1539967	1	1	1	1758388	1713105	1726042	1	1	1	79438	74184	78857	980590	1014962	986339	111108	1	107462	1	1	1	200410	204313	208834	1	147186	1	1105988	882243	1071349	532272	528857	548527	1078811	1091892	910205	172089
DG(18:1(11Z)/14:1(9Z)/0:0)	1	1	1	113607	140646	141323	787492	799718	781235	1452371	1568693	1539967	1	1	1	1758388	1713105	1726042	1	1	1	79438	74184	78857	980590	1014962	986339	111108	1	107462	1	1	1	200410	204313	208834	1	147186	1	1105988	882243	1071349	532272	528857	548527	1078811	1091892	910205	172089
DG(14:1(9Z)/18:1(9Z)/0:0)	1	1	1	113607	140646	141323	787492	799718	781235	1452371	1568693	1539967	1	1	1	1758388	1713105	1726042	1	1	1	79438	74184	78857	980590	1014962	986339	111108	1	107462	1	1	1	200410	204313	208834	1	147186	1	1105988	882243	1071349	532272	528857	548527	1078811	1091892	910205	172089
DG(14:0/18:2(9Z,12Z)/0:0)[iso2]	1	1	1	113607	140646	141323	787492	799718	781235	1452371	1568693	1539967	1	1	1	1758388	1713105	1726042	1	1	1	79438	74184	78857	980590	1014962	986339	111108	1	107462	1	1	1	200410	204313	208834	1	147186	1	1105988	882243	1071349	532272	528857	548527	1078811	1091892	910205	172089
DG(14:1n5/0:0/18:1n9)	1	1	1	113607	140646	141323	787492	799718	781235	1452371	1568693	1539967	1	1	1	1758388	1713105	1726042	1	1	1	79438	74184	78857	980590	1014962	986339	111108	1	107462	1	1	1	200410	204313	208834	1	147186	1	1105988	882243	1071349	532272	528857	548527	1078811	1091892	910205	172089
DG(14:1n5/0:0/18:1n7)	1	1	1	113607	140646	141323	787492	799718	781235	1452371	1568693	1539967	1	1	1	1758388	1713105	1726042	1	1	1	79438	74184	78857	980590	1014962	986339	111108	1	107462	1	1	1	200410	204313	208834	1	147186	1	1105988	882243	1071349	532272	528857	548527	1078811	1091892	910205	172089
DG(16:1(9Z)/16:1(9Z)/0:0)	1	1	1	113607	140646	141323	787492	799718	781235	1452371	1568693	1539967	1	1	1	1758388	1713105	1726042	1	1	1	79438	74184	78857	980590	1014962	986339	111108	1	107462	1	1	1	200410	204313	208834	1	147186	1	1105988	882243	1071349	532272	528857	548527	1078811	1091892	910205	172089
DG(18:2(9Z,12Z)/14:0/0:0)	1	1	1	113607	140646	141323	787492	799718	781235	1452371	1568693	1539967	1	1	1	1758388	1713105	1726042	1	1	1	79438	74184	78857	980590	1014962	986339	111108	1	107462	1	1	1	200410	204313	208834	1	147186	1	1105988	882243	1071349	532272	528857	548527	1078811	1091892	910205	172089
DG(16:1n7/0:0/16:1n7)	1	1	1	113607	140646	141323	787492	799718	781235	1452371	1568693	1539967	1	1	1	1758388	1713105	1726042	1	1	1	79438	74184	78857	980590	1014962	986339	111108	1	107462	1	1	1	200410	204313	208834	1	147186	1	1105988	882243	1071349	532272	528857	548527	1078811	1091892	910205	172089
LysoPC(20:2(11Z,14Z)/0:0)	1	1	1	1	1	1	1	1	1	1	1	1	1	1	1	1	1	1	1	1	1	1	1	1	1	1	1	1	1	1	1	1	1	1	1	1	1	1	1	1	1	1	1	1	1	1	1	1	1
LysoPC(20:2(11Z,14Z))	1	1	1	1	1	1	1	1	1	1	1	1	1	1	1	1	1	1	1	1	1	1	1	1	1	1	1	1	1	1	1	1	1	1	1	1	1	1	1	1	1	1	1	1	1	1	1	1	1
TG(8:0/8:0/i-15:0)	1	1	1	1	1	1	1	1	1	1	1	1	1	1	1	1	1	1	1	1	1	1	1	1	1	1	1	1	1	1	1	1	1	1	1	1	1	1	1	1	1	1	1	1	1	1	1	1	1
TG(i-13:0/10:0/8:0)	1	1	1	1	1	1	1	1	1	1	1	1	1	1	1	1	1	1	1	1	1	1	1	1	1	1	1	1	1	1	1	1	1	1	1	1	1	1	1	1	1	1	1	1	1	1	1	1	1
TG(10:0/a-13:0/8:0)[rac]	1	1	1	1	1	1	1	1	1	1	1	1	1	1	1	1	1	1	1	1	1	1	1	1	1	1	1	1	1	1	1	1	1	1	1	1	1	1	1	1	1	1	1	1	1	1	1	1	1
TG(8:0/8:0/a-15:0)[rac]	1	1	1	1	1	1	1	1	1	1	1	1	1	1	1	1	1	1	1	1	1	1	1	1	1	1	1	1	1	1	1	1	1	1	1	1	1	1	1	1	1	1	1	1	1	1	1	1	1
TG(13:0/10:0/8:0)	1	1	1	1	1	1	1	1	1	1	1	1	1	1	1	1	1	1	1	1	1	1	1	1	1	1	1	1	1	1	1	1	1	1	1	1	1	1	1	1	1	1	1	1	1	1	1	1	1
TG(8:0/13:0/10:0)	1	1	1	1	1	1	1	1	1	1	1	1	1	1	1	1	1	1	1	1	1	1	1	1	1	1	1	1	1	1	1	1	1	1	1	1	1	1	1	1	1	1	1	1	1	1	1	1	1
TG(a-13:0/8:0/10:0)[rac]	1	1	1	1	1	1	1	1	1	1	1	1	1	1	1	1	1	1	1	1	1	1	1	1	1	1	1	1	1	1	1	1	1	1	1	1	1	1	1	1	1	1	1	1	1	1	1	1	1
TG(a-15:0/8:0/8:0)[rac]	1	1	1	1	1	1	1	1	1	1	1	1	1	1	1	1	1	1	1	1	1	1	1	1	1	1	1	1	1	1	1	1	1	1	1	1	1	1	1	1	1	1	1	1	1	1	1	1	1
TG(13:0/8:0/10:0)	1	1	1	1	1	1	1	1	1	1	1	1	1	1	1	1	1	1	1	1	1	1	1	1	1	1	1	1	1	1	1	1	1	1	1	1	1	1	1	1	1	1	1	1	1	1	1	1	1
TG(8:0/a-13:0/10:0)[rac]	1	1	1	1	1	1	1	1	1	1	1	1	1	1	1	1	1	1	1	1	1	1	1	1	1	1	1	1	1	1	1	1	1	1	1	1	1	1	1	1	1	1	1	1	1	1	1	1	1
TG(10:0/8:0/i-13:0)	1	1	1	1	1	1	1	1	1	1	1	1	1	1	1	1	1	1	1	1	1	1	1	1	1	1	1	1	1	1	1	1	1	1	1	1	1	1	1	1	1	1	1	1	1	1	1	1	1
TG(i-13:0/8:0/10:0)	1	1	1	1	1	1	1	1	1	1	1	1	1	1	1	1	1	1	1	1	1	1	1	1	1	1	1	1	1	1	1	1	1	1	1	1	1	1	1	1	1	1	1	1	1	1	1	1	1
TG(8:0/10:0/13:0)	1	1	1	1	1	1	1	1	1	1	1	1	1	1	1	1	1	1	1	1	1	1	1	1	1	1	1	1	1	1	1	1	1	1	1	1	1	1	1	1	1	1	1	1	1	1	1	1	1
TG(8:0/10:0/i-13:0)	1	1	1	1	1	1	1	1	1	1	1	1	1	1	1	1	1	1	1	1	1	1	1	1	1	1	1	1	1	1	1	1	1	1	1	1	1	1	1	1	1	1	1	1	1	1	1	1	1
TG(8:0/8:0/15:0)	1	1	1	1	1	1	1	1	1	1	1	1	1	1	1	1	1	1	1	1	1	1	1	1	1	1	1	1	1	1	1	1	1	1	1	1	1	1	1	1	1	1	1	1	1	1	1	1	1
TG(a-13:0/10:0/8:0)[rac]	1	1	1	1	1	1	1	1	1	1	1	1	1	1	1	1	1	1	1	1	1	1	1	1	1	1	1	1	1	1	1	1	1	1	1	1	1	1	1	1	1	1	1	1	1	1	1	1	1
TG(i-15:0/8:0/8:0)	1	1	1	1	1	1	1	1	1	1	1	1	1	1	1	1	1	1	1	1	1	1	1	1	1	1	1	1	1	1	1	1	1	1	1	1	1	1	1	1	1	1	1	1	1	1	1	1	1
TG(10:0/8:0/a-13:0)[rac]	1	1	1	1	1	1	1	1	1	1	1	1	1	1	1	1	1	1	1	1	1	1	1	1	1	1	1	1	1	1	1	1	1	1	1	1	1	1	1	1	1	1	1	1	1	1	1	1	1
TG(8:0/10:0/a-13:0)[rac]	1	1	1	1	1	1	1	1	1	1	1	1	1	1	1	1	1	1	1	1	1	1	1	1	1	1	1	1	1	1	1	1	1	1	1	1	1	1	1	1	1	1	1	1	1	1	1	1	1
TG(8:0/i-13:0/10:0)	1	1	1	1	1	1	1	1	1	1	1	1	1	1	1	1	1	1	1	1	1	1	1	1	1	1	1	1	1	1	1	1	1	1	1	1	1	1	1	1	1	1	1	1	1	1	1	1	1
TG(10:0/13:0/8:0)	1	1	1	1	1	1	1	1	1	1	1	1	1	1	1	1	1	1	1	1	1	1	1	1	1	1	1	1	1	1	1	1	1	1	1	1	1	1	1	1	1	1	1	1	1	1	1	1	1
TG(10:0/8:0/13:0)	1	1	1	1	1	1	1	1	1	1	1	1	1	1	1	1	1	1	1	1	1	1	1	1	1	1	1	1	1	1	1	1	1	1	1	1	1	1	1	1	1	1	1	1	1	1	1	1	1
TG(10:0/i-13:0/8:0)	1	1	1	1	1	1	1	1	1	1	1	1	1	1	1	1	1	1	1	1	1	1	1	1	1	1	1	1	1	1	1	1	1	1	1	1	1	1	1	1	1	1	1	1	1	1	1	1	1
TG(15:0/8:0/8:0)	1	1	1	1	1	1	1	1	1	1	1	1	1	1	1	1	1	1	1	1	1	1	1	1	1	1	1	1	1	1	1	1	1	1	1	1	1	1	1	1	1	1	1	1	1	1	1	1	1
DG(15:0/0:0/18:4n3)	1	1	1	1	1	1	101849	109679	104620	165209	180565	176750	1	1	1	202681	200291	202410	1	1	1	1	1	1	107729	117373	110100	1	1	1	1	1	1	1	1	1	1	1	1	91508	66875	87444	40505	33149	41679	1	1	1	1
DG(18:4(6Z,9Z,12Z,15Z)/15:0/0:0)	1	1	1	1	1	1	101849	109679	104620	165209	180565	176750	1	1	1	202681	200291	202410	1	1	1	1	1	1	107729	117373	110100	1	1	1	1	1	1	1	1	1	1	1	1	91508	66875	87444	40505	33149	41679	1	1	1	1
DG(15:0/18:4(6Z,9Z,12Z,15Z)/0:0)	1	1	1	1	1	1	101849	109679	104620	165209	180565	176750	1	1	1	202681	200291	202410	1	1	1	1	1	1	107729	117373	110100	1	1	1	1	1	1	1	1	1	1	1	1	91508	66875	87444	40505	33149	41679	1	1	1	1
DG(15:0/16:1(9Z)/0:0)	1	1	1	1	1	1	1	1	1	1	1	1	1	1	1	1	1	1	1	1	1	1	1	1	1	1	1	1	1	1	1	1	1	1	1	1	1	1	1	1	1	87620	1	1	1	1	1	1	1
DG(16:1(9Z)/15:0/0:0)	1	1	1	1	1	1	1	1	1	1	1	1	1	1	1	1	1	1	1	1	1	1	1	1	1	1	1	1	1	1	1	1	1	1	1	1	1	1	1	1	1	87620	1	1	1	1	1	1	1
DG(15:0/0:0/16:1n7)	1	1	1	1	1	1	1	1	1	1	1	1	1	1	1	1	1	1	1	1	1	1	1	1	1	1	1	1	1	1	1	1	1	1	1	1	1	1	1	1	1	87620	1	1	1	1	1	1	1
LysoPC(22:0)	1	1	1	1	1	1	1	1	1	1	1	1	1	1	1	1	1	1	1	1	1	1	1	1	1	1	1	1	1	1	1	1	1	1	1	1	1	1	1	1	1	1	1	1	1	1	1	1	1
Cholesterol glucuronide	1	1	1	1	1	1	1	1	1	1	1	1	1	1	1	1	1	1	1	1	1	1	1	1	1	1	1	1	1	1	1	1	1	1	1	1	1	1	1	1	1	1	1	1	1	1	1	1	1
3-Hexaprenyl-4,5-Dihydroxybenzoic acid	1	1	1	1	1	1	1	1	1	1	1	1	1	1	1	1	1	1	1	1	1	1	1	1	1	1	1	1	1	1	1	1	1	1	1	1	1	1	1	1	1	1	1	1	1	1	1	1	1
2-Hexaprenyl-3-methyl-6-methoxy-1,4-benzoquinol	1	1	1	1	1	1	1	1	1	1	1	1	1	1	1	1	1	1	1	1	1	1	1	1	1	1	1	1	1	1	1	1	1	1	1	1	1	1	1	1	1	1	1	1	1	1	1	1	1
CE(10:0)	1	1	1	1	1	1	1	1	1	1	1	1	1	1	1	83707	74989	78657	1	1	1	1	1	1	1	1	1	1	1	1	1	1	1	1	1	1	1	1	1	1	1	1	1	1	1	1	1	1	1
Hexacosanoyl carnitine	1	1	1	1	1	1	1	1	1	1	1	1	1	1	1	1	1	1	1	1	1	1	1	1	1	1	1	1	1	1	1	1	1	1	1	1	1	1	1	1	1	1	1	1	1	1	1	1	1
2-Octaprenyl-3-methyl-6-methoxy-1,4-benzoquinol	1	1	1	1	1	1	1	1	1	1	1	1	1	1	1	1	1	1	1	1	1	1	1	1	1	1	1	1	1	1	1	1	1	1	1	1	1	1	1	1	1	1	1	1	1	1	1	1	1
TG(16:0/10:0/6:0)	1	1	1	1	1	1	1	1	1	1	1	1	1	1	1	1	1	1	1	1	1	1	1	1	1	1	1	1	1	1	1	1	1	1	1	1	1	1	1	1	1	1	1	1	1	1	1	1	1
TG(8:0/i-14:0/10:0)	1	1	1	1	1	1	1	1	1	1	1	1	1	1	1	1	1	1	1	1	1	1	1	1	1	1	1	1	1	1	1	1	1	1	1	1	1	1	1	1	1	1	1	1	1	1	1	1	1
TG(14:0/8:0/10:0)	1	1	1	1	1	1	1	1	1	1	1	1	1	1	1	1	1	1	1	1	1	1	1	1	1	1	1	1	1	1	1	1	1	1	1	1	1	1	1	1	1	1	1	1	1	1	1	1	1
TG(4:0/12:0/16:0)	1	1	1	1	1	1	1	1	1	1	1	1	1	1	1	1	1	1	1	1	1	1	1	1	1	1	1	1	1	1	1	1	1	1	1	1	1	1	1	1	1	1	1	1	1	1	1	1	1
TG(14:0/14:0/4:0)	1	1	1	1	1	1	1	1	1	1	1	1	1	1	1	1	1	1	1	1	1	1	1	1	1	1	1	1	1	1	1	1	1	1	1	1	1	1	1	1	1	1	1	1	1	1	1	1	1
TG(10:0/i-14:0/8:0)	1	1	1	1	1	1	1	1	1	1	1	1	1	1	1	1	1	1	1	1	1	1	1	1	1	1	1	1	1	1	1	1	1	1	1	1	1	1	1	1	1	1	1	1	1	1	1	1	1
TG(10:0/10:0/12:0)	1	1	1	1	1	1	1	1	1	1	1	1	1	1	1	1	1	1	1	1	1	1	1	1	1	1	1	1	1	1	1	1	1	1	1	1	1	1	1	1	1	1	1	1	1	1	1	1	1
TG(8:0/10:0/i-14:0)	1	1	1	1	1	1	1	1	1	1	1	1	1	1	1	1	1	1	1	1	1	1	1	1	1	1	1	1	1	1	1	1	1	1	1	1	1	1	1	1	1	1	1	1	1	1	1	1	1
TG(16:0/8:0/8:0)	1	1	1	1	1	1	1	1	1	1	1	1	1	1	1	1	1	1	1	1	1	1	1	1	1	1	1	1	1	1	1	1	1	1	1	1	1	1	1	1	1	1	1	1	1	1	1	1	1
TG(8:0/14:0/10:0)	1	1	1	1	1	1	1	1	1	1	1	1	1	1	1	1	1	1	1	1	1	1	1	1	1	1	1	1	1	1	1	1	1	1	1	1	1	1	1	1	1	1	1	1	1	1	1	1	1
TG(8:0/8:0/16:0)	1	1	1	1	1	1	1	1	1	1	1	1	1	1	1	1	1	1	1	1	1	1	1	1	1	1	1	1	1	1	1	1	1	1	1	1	1	1	1	1	1	1	1	1	1	1	1	1	1
TG(i-16:0/8:0/8:0)	1	1	1	1	1	1	1	1	1	1	1	1	1	1	1	1	1	1	1	1	1	1	1	1	1	1	1	1	1	1	1	1	1	1	1	1	1	1	1	1	1	1	1	1	1	1	1	1	1
TG(12:0/10:0/10:0)	1	1	1	1	1	1	1	1	1	1	1	1	1	1	1	1	1	1	1	1	1	1	1	1	1	1	1	1	1	1	1	1	1	1	1	1	1	1	1	1	1	1	1	1	1	1	1	1	1
TG(4:0/14:0/14:0)	1	1	1	1	1	1	1	1	1	1	1	1	1	1	1	1	1	1	1	1	1	1	1	1	1	1	1	1	1	1	1	1	1	1	1	1	1	1	1	1	1	1	1	1	1	1	1	1	1
TG(8:0/8:0/i-16:0)	1	1	1	1	1	1	1	1	1	1	1	1	1	1	1	1	1	1	1	1	1	1	1	1	1	1	1	1	1	1	1	1	1	1	1	1	1	1	1	1	1	1	1	1	1	1	1	1	1
TG(i-14:0/10:0/8:0)	1	1	1	1	1	1	1	1	1	1	1	1	1	1	1	1	1	1	1	1	1	1	1	1	1	1	1	1	1	1	1	1	1	1	1	1	1	1	1	1	1	1	1	1	1	1	1	1	1
TG(i-14:0/8:0/10:0)	1	1	1	1	1	1	1	1	1	1	1	1	1	1	1	1	1	1	1	1	1	1	1	1	1	1	1	1	1	1	1	1	1	1	1	1	1	1	1	1	1	1	1	1	1	1	1	1	1
TG(8:0/i-12:0/12:0)	1	1	1	1	1	1	1	1	1	1	1	1	1	1	1	1	1	1	1	1	1	1	1	1	1	1	1	1	1	1	1	1	1	1	1	1	1	1	1	1	1	1	1	1	1	1	1	1	1
TG(10:0/14:0/8:0)	1	1	1	1	1	1	1	1	1	1	1	1	1	1	1	1	1	1	1	1	1	1	1	1	1	1	1	1	1	1	1	1	1	1	1	1	1	1	1	1	1	1	1	1	1	1	1	1	1
TG(8:0/12:0/12:0)	1	1	1	1	1	1	1	1	1	1	1	1	1	1	1	1	1	1	1	1	1	1	1	1	1	1	1	1	1	1	1	1	1	1	1	1	1	1	1	1	1	1	1	1	1	1	1	1	1
TG(12:0/i-12:0/8:0)	1	1	1	1	1	1	1	1	1	1	1	1	1	1	1	1	1	1	1	1	1	1	1	1	1	1	1	1	1	1	1	1	1	1	1	1	1	1	1	1	1	1	1	1	1	1	1	1	1
TG(14:0/10:0/8:0)	1	1	1	1	1	1	1	1	1	1	1	1	1	1	1	1	1	1	1	1	1	1	1	1	1	1	1	1	1	1	1	1	1	1	1	1	1	1	1	1	1	1	1	1	1	1	1	1	1
TG(8:0/i-12:0/i-12:0)	1	1	1	1	1	1	1	1	1	1	1	1	1	1	1	1	1	1	1	1	1	1	1	1	1	1	1	1	1	1	1	1	1	1	1	1	1	1	1	1	1	1	1	1	1	1	1	1	1
TG(8:0/12:0/i-12:0)	1	1	1	1	1	1	1	1	1	1	1	1	1	1	1	1	1	1	1	1	1	1	1	1	1	1	1	1	1	1	1	1	1	1	1	1	1	1	1	1	1	1	1	1	1	1	1	1	1
TG(10:0/16:0/6:0)	1	1	1	1	1	1	1	1	1	1	1	1	1	1	1	1	1	1	1	1	1	1	1	1	1	1	1	1	1	1	1	1	1	1	1	1	1	1	1	1	1	1	1	1	1	1	1	1	1
TG(16:0/12:0/4:0)	1	1	1	1	1	1	1	1	1	1	1	1	1	1	1	1	1	1	1	1	1	1	1	1	1	1	1	1	1	1	1	1	1	1	1	1	1	1	1	1	1	1	1	1	1	1	1	1	1
TG(10:0/10:0/i-12:0)	1	1	1	1	1	1	1	1	1	1	1	1	1	1	1	1	1	1	1	1	1	1	1	1	1	1	1	1	1	1	1	1	1	1	1	1	1	1	1	1	1	1	1	1	1	1	1	1	1
TG(i-12:0/i-12:0/8:0)	1	1	1	1	1	1	1	1	1	1	1	1	1	1	1	1	1	1	1	1	1	1	1	1	1	1	1	1	1	1	1	1	1	1	1	1	1	1	1	1	1	1	1	1	1	1	1	1	1
TG(6:0/12:0/14:0)	1	1	1	1	1	1	1	1	1	1	1	1	1	1	1	1	1	1	1	1	1	1	1	1	1	1	1	1	1	1	1	1	1	1	1	1	1	1	1	1	1	1	1	1	1	1	1	1	1
TG(10:0/8:0/14:0)	1	1	1	1	1	1	1	1	1	1	1	1	1	1	1	1	1	1	1	1	1	1	1	1	1	1	1	1	1	1	1	1	1	1	1	1	1	1	1	1	1	1	1	1	1	1	1	1	1
TG(i-12:0/12:0/8:0)	1	1	1	1	1	1	1	1	1	1	1	1	1	1	1	1	1	1	1	1	1	1	1	1	1	1	1	1	1	1	1	1	1	1	1	1	1	1	1	1	1	1	1	1	1	1	1	1	1
TG(10:0/8:0/i-14:0)	1	1	1	1	1	1	1	1	1	1	1	1	1	1	1	1	1	1	1	1	1	1	1	1	1	1	1	1	1	1	1	1	1	1	1	1	1	1	1	1	1	1	1	1	1	1	1	1	1
TG(i-12:0/10:0/10:0)	1	1	1	1	1	1	1	1	1	1	1	1	1	1	1	1	1	1	1	1	1	1	1	1	1	1	1	1	1	1	1	1	1	1	1	1	1	1	1	1	1	1	1	1	1	1	1	1	1
TG(i-12:0/8:0/12:0)	1	1	1	1	1	1	1	1	1	1	1	1	1	1	1	1	1	1	1	1	1	1	1	1	1	1	1	1	1	1	1	1	1	1	1	1	1	1	1	1	1	1	1	1	1	1	1	1	1
TG(12:0/12:0/8:0)	1	1	1	1	1	1	1	1	1	1	1	1	1	1	1	1	1	1	1	1	1	1	1	1	1	1	1	1	1	1	1	1	1	1	1	1	1	1	1	1	1	1	1	1	1	1	1	1	1
TG(12:0/8:0/i-12:0)	1	1	1	1	1	1	1	1	1	1	1	1	1	1	1	1	1	1	1	1	1	1	1	1	1	1	1	1	1	1	1	1	1	1	1	1	1	1	1	1	1	1	1	1	1	1	1	1	1
TG(8:0/10:0/14:0)	1	1	1	1	1	1	1	1	1	1	1	1	1	1	1	1	1	1	1	1	1	1	1	1	1	1	1	1	1	1	1	1	1	1	1	1	1	1	1	1	1	1	1	1	1	1	1	1	1
DG(14:1n5/0:0/20:5n3)	1	1	1	1	1	1	1	1	1	1	1	1	1	1	1	1	1	1	1	1	1	1	1	1	1	1	1	1	1	1	1	1	1	1	1	1	1	1	1	1	1	1	1	1	1	1	1	1	1
DG(14:1(9Z)/20:5(5Z,8Z,11Z,14Z,17Z)/0:0)	1	1	1	1	1	1	1	1	1	1	1	1	1	1	1	1	1	1	1	1	1	1	1	1	1	1	1	1	1	1	1	1	1	1	1	1	1	1	1	1	1	1	1	1	1	1	1	1	1
DG(20:5(5Z,8Z,11Z,14Z,17Z)/14:1(9Z)/0:0)	1	1	1	1	1	1	1	1	1	1	1	1	1	1	1	1	1	1	1	1	1	1	1	1	1	1	1	1	1	1	1	1	1	1	1	1	1	1	1	1	1	1	1	1	1	1	1	1	1
cis-5,6-Dihydro-5,6-dihydroxy-carotene	1	1	1	1	1	1	1	1	1	1	1	1	1	1	1	1	1	1	1	1	1	1	1	1	1	1	1	1	1	1	1	1	1	1	1	1	1	1	1	1	1	1	1	1	1	1	1	1	1
DG(14:1n5/0:0/20:4n3)	1	1	1	1	1	1	787492	799718	781235	1447088	1554643	1539967	1	1	1	1752016	1707665	1720921	1	1	1	1	1	1	980590	1014962	986339	1	1	1	1	1	1	1	204313	208834	1	1	1	1105988	882243	1071349	532272	528857	548527	1078811	1091892	910205	1
DG(14:1(9Z)/20:4(8Z,11Z,14Z,17Z)/0:0)	1	1	1	1	1	1	787492	799718	781235	1447088	1554643	1539967	1	1	1	1752016	1707665	1720921	1	1	1	1	1	1	980590	1014962	986339	1	1	1	1	1	1	1	204313	208834	1	1	1	1105988	882243	1071349	532272	528857	548527	1078811	1091892	910205	1
DG(16:1(9Z)/18:4(6Z,9Z,12Z,15Z)/0:0)	1	1	1	1	1	1	787492	799718	781235	1447088	1554643	1539967	1	1	1	1752016	1707665	1720921	1	1	1	1	1	1	980590	1014962	986339	1	1	1	1	1	1	1	204313	208834	1	1	1	1105988	882243	1071349	532272	528857	548527	1078811	1091892	910205	1
DG(20:4(8Z,11Z,14Z,17Z)/14:1(9Z)/0:0)	1	1	1	1	1	1	787492	799718	781235	1447088	1554643	1539967	1	1	1	1752016	1707665	1720921	1	1	1	1	1	1	980590	1014962	986339	1	1	1	1	1	1	1	204313	208834	1	1	1	1105988	882243	1071349	532272	528857	548527	1078811	1091892	910205	1
DG(20:5(5Z,8Z,11Z,14Z,17Z)/14:0/0:0)	1	1	1	1	1	1	787492	799718	781235	1447088	1554643	1539967	1	1	1	1752016	1707665	1720921	1	1	1	1	1	1	980590	1014962	986339	1	1	1	1	1	1	1	204313	208834	1	1	1	1105988	882243	1071349	532272	528857	548527	1078811	1091892	910205	1
DG(18:4(6Z,9Z,12Z,15Z)/16:1(9Z)/0:0)	1	1	1	1	1	1	787492	799718	781235	1447088	1554643	1539967	1	1	1	1752016	1707665	1720921	1	1	1	1	1	1	980590	1014962	986339	1	1	1	1	1	1	1	204313	208834	1	1	1	1105988	882243	1071349	532272	528857	548527	1078811	1091892	910205	1
DG(14:1(9Z)/20:4(5Z,8Z,11Z,14Z)/0:0)	1	1	1	1	1	1	787492	799718	781235	1447088	1554643	1539967	1	1	1	1752016	1707665	1720921	1	1	1	1	1	1	980590	1014962	986339	1	1	1	1	1	1	1	204313	208834	1	1	1	1105988	882243	1071349	532272	528857	548527	1078811	1091892	910205	1
DG(14:1n5/0:0/20:4n6)	1	1	1	1	1	1	787492	799718	781235	1447088	1554643	1539967	1	1	1	1752016	1707665	1720921	1	1	1	1	1	1	980590	1014962	986339	1	1	1	1	1	1	1	204313	208834	1	1	1	1105988	882243	1071349	532272	528857	548527	1078811	1091892	910205	1
DG(14:0/20:5(5Z,8Z,11Z,14Z,17Z)/0:0)	1	1	1	1	1	1	787492	799718	781235	1447088	1554643	1539967	1	1	1	1752016	1707665	1720921	1	1	1	1	1	1	980590	1014962	986339	1	1	1	1	1	1	1	204313	208834	1	1	1	1105988	882243	1071349	532272	528857	548527	1078811	1091892	910205	1
DG(16:1n7/0:0/18:4n3)	1	1	1	1	1	1	787492	799718	781235	1447088	1554643	1539967	1	1	1	1752016	1707665	1720921	1	1	1	1	1	1	980590	1014962	986339	1	1	1	1	1	1	1	204313	208834	1	1	1	1105988	882243	1071349	532272	528857	548527	1078811	1091892	910205	1
DG(14:0/0:0/20:5n3)	1	1	1	1	1	1	787492	799718	781235	1447088	1554643	1539967	1	1	1	1752016	1707665	1720921	1	1	1	1	1	1	980590	1014962	986339	1	1	1	1	1	1	1	204313	208834	1	1	1	1105988	882243	1071349	532272	528857	548527	1078811	1091892	910205	1
DG(20:4(5Z,8Z,11Z,14Z)/14:1(9Z)/0:0)	1	1	1	1	1	1	787492	799718	781235	1447088	1554643	1539967	1	1	1	1752016	1707665	1720921	1	1	1	1	1	1	980590	1014962	986339	1	1	1	1	1	1	1	204313	208834	1	1	1	1105988	882243	1071349	532272	528857	548527	1078811	1091892	910205	1
DG(16:0/0:0/18:4n3)	320549	305645	311304	961169	1093773	1092022	4673160	4677298	4656006	6407169	6657596	6654705	612441	631807	653936	7692421	7676844	7702209	1	183026	201931	617836	637682	620153	4328847	4434097	4410989	594235	482452	577525	233447	248177	264646	918106	930287	938732	699668	751240	809065	4316093	3690108	4138683	2631902	2654017	2709226	5230453	5288916	4669252	812479
DG(20:4(8Z,11Z,14Z,17Z)/14:0/0:0)	320549	305645	311304	961169	1093773	1092022	4673160	4677298	4656006	6407169	6657596	6654705	612441	631807	653936	7692421	7676844	7702209	1	183026	201931	617836	637682	620153	4328847	4434097	4410989	594235	482452	577525	233447	248177	264646	918106	930287	938732	699668	751240	809065	4316093	3690108	4138683	2631902	2654017	2709226	5230453	5288916	4669252	812479
DG(16:1(9Z)/18:3(6Z,9Z,12Z)/0:0)	320549	305645	311304	961169	1093773	1092022	4673160	4677298	4656006	6407169	6657596	6654705	612441	631807	653936	7692421	7676844	7702209	1	183026	201931	617836	637682	620153	4328847	4434097	4410989	594235	482452	577525	233447	248177	264646	918106	930287	938732	699668	751240	809065	4316093	3690108	4138683	2631902	2654017	2709226	5230453	5288916	4669252	812479
DG(14:1(9Z)/20:3(8Z,11Z,14Z)/0:0)	320549	305645	311304	961169	1093773	1092022	4673160	4677298	4656006	6407169	6657596	6654705	612441	631807	653936	7692421	7676844	7702209	1	183026	201931	617836	637682	620153	4328847	4434097	4410989	594235	482452	577525	233447	248177	264646	918106	930287	938732	699668	751240	809065	4316093	3690108	4138683	2631902	2654017	2709226	5230453	5288916	4669252	812479
DG(18:3(9Z,12Z,15Z)/16:1(9Z)/0:0)	320549	305645	311304	961169	1093773	1092022	4673160	4677298	4656006	6407169	6657596	6654705	612441	631807	653936	7692421	7676844	7702209	1	183026	201931	617836	637682	620153	4328847	4434097	4410989	594235	482452	577525	233447	248177	264646	918106	930287	938732	699668	751240	809065	4316093	3690108	4138683	2631902	2654017	2709226	5230453	5288916	4669252	812479
DG(14:1n5/0:0/20:3n9)	320549	305645	311304	961169	1093773	1092022	4673160	4677298	4656006	6407169	6657596	6654705	612441	631807	653936	7692421	7676844	7702209	1	183026	201931	617836	637682	620153	4328847	4434097	4410989	594235	482452	577525	233447	248177	264646	918106	930287	938732	699668	751240	809065	4316093	3690108	4138683	2631902	2654017	2709226	5230453	5288916	4669252	812479
DG(20:3(5Z,8Z,11Z)/14:1(9Z)/0:0)	320549	305645	311304	961169	1093773	1092022	4673160	4677298	4656006	6407169	6657596	6654705	612441	631807	653936	7692421	7676844	7702209	1	183026	201931	617836	637682	620153	4328847	4434097	4410989	594235	482452	577525	233447	248177	264646	918106	930287	938732	699668	751240	809065	4316093	3690108	4138683	2631902	2654017	2709226	5230453	5288916	4669252	812479
DG(18:3(6Z,9Z,12Z)/16:1(9Z)/0:0)	320549	305645	311304	961169	1093773	1092022	4673160	4677298	4656006	6407169	6657596	6654705	612441	631807	653936	7692421	7676844	7702209	1	183026	201931	617836	637682	620153	4328847	4434097	4410989	594235	482452	577525	233447	248177	264646	918106	930287	938732	699668	751240	809065	4316093	3690108	4138683	2631902	2654017	2709226	5230453	5288916	4669252	812479
DG(20:3(8Z,11Z,14Z)/14:1(9Z)/0:0)	320549	305645	311304	961169	1093773	1092022	4673160	4677298	4656006	6407169	6657596	6654705	612441	631807	653936	7692421	7676844	7702209	1	183026	201931	617836	637682	620153	4328847	4434097	4410989	594235	482452	577525	233447	248177	264646	918106	930287	938732	699668	751240	809065	4316093	3690108	4138683	2631902	2654017	2709226	5230453	5288916	4669252	812479
DG(14:1n5/0:0/20:3n6)	320549	305645	311304	961169	1093773	1092022	4673160	4677298	4656006	6407169	6657596	6654705	612441	631807	653936	7692421	7676844	7702209	1	183026	201931	617836	637682	620153	4328847	4434097	4410989	594235	482452	577525	233447	248177	264646	918106	930287	938732	699668	751240	809065	4316093	3690108	4138683	2631902	2654017	2709226	5230453	5288916	4669252	812479
DG(20:4(5Z,8Z,11Z,14Z)/14:0/0:0)	320549	305645	311304	961169	1093773	1092022	4673160	4677298	4656006	6407169	6657596	6654705	612441	631807	653936	7692421	7676844	7702209	1	183026	201931	617836	637682	620153	4328847	4434097	4410989	594235	482452	577525	233447	248177	264646	918106	930287	938732	699668	751240	809065	4316093	3690108	4138683	2631902	2654017	2709226	5230453	5288916	4669252	812479
DG(14:0/20:4(5Z,8Z,11Z,14Z)/0:0)	320549	305645	311304	961169	1093773	1092022	4673160	4677298	4656006	6407169	6657596	6654705	612441	631807	653936	7692421	7676844	7702209	1	183026	201931	617836	637682	620153	4328847	4434097	4410989	594235	482452	577525	233447	248177	264646	918106	930287	938732	699668	751240	809065	4316093	3690108	4138683	2631902	2654017	2709226	5230453	5288916	4669252	812479
DG(16:1(9Z)/18:3(9Z,12Z,15Z)/0:0)	320549	305645	311304	961169	1093773	1092022	4673160	4677298	4656006	6407169	6657596	6654705	612441	631807	653936	7692421	7676844	7702209	1	183026	201931	617836	637682	620153	4328847	4434097	4410989	594235	482452	577525	233447	248177	264646	918106	930287	938732	699668	751240	809065	4316093	3690108	4138683	2631902	2654017	2709226	5230453	5288916	4669252	812479
DG(18:4(6Z,9Z,12Z,15Z)/16:0/0:0)	320549	305645	311304	961169	1093773	1092022	4673160	4677298	4656006	6407169	6657596	6654705	612441	631807	653936	7692421	7676844	7702209	1	183026	201931	617836	637682	620153	4328847	4434097	4410989	594235	482452	577525	233447	248177	264646	918106	930287	938732	699668	751240	809065	4316093	3690108	4138683	2631902	2654017	2709226	5230453	5288916	4669252	812479
DG(14:0/0:0/20:4n6)	320549	305645	311304	961169	1093773	1092022	4673160	4677298	4656006	6407169	6657596	6654705	612441	631807	653936	7692421	7676844	7702209	1	183026	201931	617836	637682	620153	4328847	4434097	4410989	594235	482452	577525	233447	248177	264646	918106	930287	938732	699668	751240	809065	4316093	3690108	4138683	2631902	2654017	2709226	5230453	5288916	4669252	812479
DG(14:1(9Z)/20:3(5Z,8Z,11Z)/0:0)	320549	305645	311304	961169	1093773	1092022	4673160	4677298	4656006	6407169	6657596	6654705	612441	631807	653936	7692421	7676844	7702209	1	183026	201931	617836	637682	620153	4328847	4434097	4410989	594235	482452	577525	233447	248177	264646	918106	930287	938732	699668	751240	809065	4316093	3690108	4138683	2631902	2654017	2709226	5230453	5288916	4669252	812479
DG(14:0/0:0/20:4n3)	320549	305645	311304	961169	1093773	1092022	4673160	4677298	4656006	6407169	6657596	6654705	612441	631807	653936	7692421	7676844	7702209	1	183026	201931	617836	637682	620153	4328847	4434097	4410989	594235	482452	577525	233447	248177	264646	918106	930287	938732	699668	751240	809065	4316093	3690108	4138683	2631902	2654017	2709226	5230453	5288916	4669252	812479
DG(16:0/18:4(6Z,9Z,12Z,15Z)/0:0)	320549	305645	311304	961169	1093773	1092022	4673160	4677298	4656006	6407169	6657596	6654705	612441	631807	653936	7692421	7676844	7702209	1	183026	201931	617836	637682	620153	4328847	4434097	4410989	594235	482452	577525	233447	248177	264646	918106	930287	938732	699668	751240	809065	4316093	3690108	4138683	2631902	2654017	2709226	5230453	5288916	4669252	812479
DG(14:0/20:4(8Z,11Z,14Z,17Z)/0:0)	320549	305645	311304	961169	1093773	1092022	4673160	4677298	4656006	6407169	6657596	6654705	612441	631807	653936	7692421	7676844	7702209	1	183026	201931	617836	637682	620153	4328847	4434097	4410989	594235	482452	577525	233447	248177	264646	918106	930287	938732	699668	751240	809065	4316093	3690108	4138683	2631902	2654017	2709226	5230453	5288916	4669252	812479
DG(16:1n7/0:0/18:3n6)	320549	305645	311304	961169	1093773	1092022	4673160	4677298	4656006	6407169	6657596	6654705	612441	631807	653936	7692421	7676844	7702209	1	183026	201931	617836	637682	620153	4328847	4434097	4410989	594235	482452	577525	233447	248177	264646	918106	930287	938732	699668	751240	809065	4316093	3690108	4138683	2631902	2654017	2709226	5230453	5288916	4669252	812479
DG(16:1n7/0:0/18:3n3)	320549	305645	311304	961169	1093773	1092022	4673160	4677298	4656006	6407169	6657596	6654705	612441	631807	653936	7692421	7676844	7702209	1	183026	201931	617836	637682	620153	4328847	4434097	4410989	594235	482452	577525	233447	248177	264646	918106	930287	938732	699668	751240	809065	4316093	3690108	4138683	2631902	2654017	2709226	5230453	5288916	4669252	812479
LysoPC(22:6(4Z,7Z,10Z,13Z,16Z,19Z))	1	1	1	1	1	1	1	1	1	1	1	1	1	1	1	1	1	1	1	1	1	1	1	1	1	1	1	1	1	1	1	1	1	1	1	1	1	1	1	1	1	1	1	1	1	1	1	1	1
5,6-Dihydro-5,6-dihydroxy-y,y-carotene	1	1	1	1	1	1	1	1	1	1	1	1	1	1	1	1	1	1	1	1	1	1	1	1	1	1	1	1	1	1	1	1	1	1	1	1	1	1	1	1	1	1	1	1	1	1	1	1	1
DG(14:0/18:1(9Z)/0:0)[iso2]	320549	305645	311304	961169	1093773	1092022	4673370	4690292	4655998	6438381	6726420	6674473	612441	631807	653936	7815635	7709910	7739704	1	183026	201931	617836	637682	620153	4329469	4434738	4411584	594235	482452	577525	233447	248177	264646	918106	930287	938732	699668	751240	809065	4316087	3690042	4138748	2631902	2654017	2709226	5230453	5288916	4669252	812479
DG(14:1(9Z)/18:0/0:0)	320549	305645	311304	961169	1093773	1092022	4673370	4690292	4655998	6438381	6726420	6674473	612441	631807	653936	7815635	7709910	7739704	1	183026	201931	617836	637682	620153	4329469	4434738	4411584	594235	482452	577525	233447	248177	264646	918106	930287	938732	699668	751240	809065	4316087	3690042	4138748	2631902	2654017	2709226	5230453	5288916	4669252	812479
DG(14:0/18:1(11Z)/0:0)	320549	305645	311304	961169	1093773	1092022	4673370	4690292	4655998	6438381	6726420	6674473	612441	631807	653936	7815635	7709910	7739704	1	183026	201931	617836	637682	620153	4329469	4434738	4411584	594235	482452	577525	233447	248177	264646	918106	930287	938732	699668	751240	809065	4316087	3690042	4138748	2631902	2654017	2709226	5230453	5288916	4669252	812479
DG(16:0/0:0/16:1n7)	320549	305645	311304	961169	1093773	1092022	4673370	4690292	4655998	6438381	6726420	6674473	612441	631807	653936	7815635	7709910	7739704	1	183026	201931	617836	637682	620153	4329469	4434738	4411584	594235	482452	577525	233447	248177	264646	918106	930287	938732	699668	751240	809065	4316087	3690042	4138748	2631902	2654017	2709226	5230453	5288916	4669252	812479
DG(14:1(9Z)/18:0/0:0)[iso2]	320549	305645	311304	961169	1093773	1092022	4673370	4690292	4655998	6438381	6726420	6674473	612441	631807	653936	7815635	7709910	7739704	1	183026	201931	617836	637682	620153	4329469	4434738	4411584	594235	482452	577525	233447	248177	264646	918106	930287	938732	699668	751240	809065	4316087	3690042	4138748	2631902	2654017	2709226	5230453	5288916	4669252	812479
DG(18:0/14:1(9Z)/0:0)	320549	305645	311304	961169	1093773	1092022	4673370	4690292	4655998	6438381	6726420	6674473	612441	631807	653936	7815635	7709910	7739704	1	183026	201931	617836	637682	620153	4329469	4434738	4411584	594235	482452	577525	233447	248177	264646	918106	930287	938732	699668	751240	809065	4316087	3690042	4138748	2631902	2654017	2709226	5230453	5288916	4669252	812479
DG(14:0/0:0/18:1n9)	320549	305645	311304	961169	1093773	1092022	4673370	4690292	4655998	6438381	6726420	6674473	612441	631807	653936	7815635	7709910	7739704	1	183026	201931	617836	637682	620153	4329469	4434738	4411584	594235	482452	577525	233447	248177	264646	918106	930287	938732	699668	751240	809065	4316087	3690042	4138748	2631902	2654017	2709226	5230453	5288916	4669252	812479
DG(14:0/0:0/18:1n7)	320549	305645	311304	961169	1093773	1092022	4673370	4690292	4655998	6438381	6726420	6674473	612441	631807	653936	7815635	7709910	7739704	1	183026	201931	617836	637682	620153	4329469	4434738	4411584	594235	482452	577525	233447	248177	264646	918106	930287	938732	699668	751240	809065	4316087	3690042	4138748	2631902	2654017	2709226	5230453	5288916	4669252	812479
DG(18:1(9Z)/14:0/0:0)	320549	305645	311304	961169	1093773	1092022	4673370	4690292	4655998	6438381	6726420	6674473	612441	631807	653936	7815635	7709910	7739704	1	183026	201931	617836	637682	620153	4329469	4434738	4411584	594235	482452	577525	233447	248177	264646	918106	930287	938732	699668	751240	809065	4316087	3690042	4138748	2631902	2654017	2709226	5230453	5288916	4669252	812479
DG(12:0/20:1(11Z)/0:0)[iso2]	320549	305645	311304	961169	1093773	1092022	4673370	4690292	4655998	6438381	6726420	6674473	612441	631807	653936	7815635	7709910	7739704	1	183026	201931	617836	637682	620153	4329469	4434738	4411584	594235	482452	577525	233447	248177	264646	918106	930287	938732	699668	751240	809065	4316087	3690042	4138748	2631902	2654017	2709226	5230453	5288916	4669252	812479
DG(16:1(9Z)/16:0/0:0)	320549	305645	311304	961169	1093773	1092022	4673370	4690292	4655998	6438381	6726420	6674473	612441	631807	653936	7815635	7709910	7739704	1	183026	201931	617836	637682	620153	4329469	4434738	4411584	594235	482452	577525	233447	248177	264646	918106	930287	938732	699668	751240	809065	4316087	3690042	4138748	2631902	2654017	2709226	5230453	5288916	4669252	812479
DG(16:0/16:1(9Z)/0:0)[iso2]	320549	305645	311304	961169	1093773	1092022	4673370	4690292	4655998	6438381	6726420	6674473	612441	631807	653936	7815635	7709910	7739704	1	183026	201931	617836	637682	620153	4329469	4434738	4411584	594235	482452	577525	233447	248177	264646	918106	930287	938732	699668	751240	809065	4316087	3690042	4138748	2631902	2654017	2709226	5230453	5288916	4669252	812479
DG(18:0/0:0/14:1n5)	320549	305645	311304	961169	1093773	1092022	4673370	4690292	4655998	6438381	6726420	6674473	612441	631807	653936	7815635	7709910	7739704	1	183026	201931	617836	637682	620153	4329469	4434738	4411584	594235	482452	577525	233447	248177	264646	918106	930287	938732	699668	751240	809065	4316087	3690042	4138748	2631902	2654017	2709226	5230453	5288916	4669252	812479
DG(18:1(11Z)/14:0/0:0)	320549	305645	311304	961169	1093773	1092022	4673370	4690292	4655998	6438381	6726420	6674473	612441	631807	653936	7815635	7709910	7739704	1	183026	201931	617836	637682	620153	4329469	4434738	4411584	594235	482452	577525	233447	248177	264646	918106	930287	938732	699668	751240	809065	4316087	3690042	4138748	2631902	2654017	2709226	5230453	5288916	4669252	812479
DG(14:0/18:1(9Z)/0:0)	320549	305645	311304	961169	1093773	1092022	4673370	4690292	4655998	6438381	6726420	6674473	612441	631807	653936	7815635	7709910	7739704	1	183026	201931	617836	637682	620153	4329469	4434738	4411584	594235	482452	577525	233447	248177	264646	918106	930287	938732	699668	751240	809065	4316087	3690042	4138748	2631902	2654017	2709226	5230453	5288916	4669252	812479
DG(16:0/16:1(9Z)/0:0)	320549	305645	311304	961169	1093773	1092022	4673370	4690292	4655998	6438381	6726420	6674473	612441	631807	653936	7815635	7709910	7739704	1	183026	201931	617836	637682	620153	4329469	4434738	4411584	594235	482452	577525	233447	248177	264646	918106	930287	938732	699668	751240	809065	4316087	3690042	4138748	2631902	2654017	2709226	5230453	5288916	4669252	812479
DG(18:3(6Z,9Z,12Z)/16:0/0:0)	1	1	1	1	1	1	136279	142758	138953	240471	270147	256981	1	1	1	286097	276954	281039	1	1	1	1	1	1	178637	194857	182749	1	1	1	1	1	1	1	1	1	1	1	1	179765	135487	171680	50049	42392	50065	157425	163485	133611	1
DG(16:0/18:3(6Z,9Z,12Z)/0:0)	1	1	1	1	1	1	136279	142758	138953	240471	270147	256981	1	1	1	286097	276954	281039	1	1	1	1	1	1	178637	194857	182749	1	1	1	1	1	1	1	1	1	1	1	1	179765	135487	171680	50049	42392	50065	157425	163485	133611	1
DG(14:0/0:0/20:3n6)	1	1	1	1	1	1	136279	142758	138953	240471	270147	256981	1	1	1	286097	276954	281039	1	1	1	1	1	1	178637	194857	182749	1	1	1	1	1	1	1	1	1	1	1	1	179765	135487	171680	50049	42392	50065	157425	163485	133611	1
DG(14:0/0:0/20:3n9)	1	1	1	1	1	1	136279	142758	138953	240471	270147	256981	1	1	1	286097	276954	281039	1	1	1	1	1	1	178637	194857	182749	1	1	1	1	1	1	1	1	1	1	1	1	179765	135487	171680	50049	42392	50065	157425	163485	133611	1
DG(16:0/0:0/18:3n6)	1	1	1	1	1	1	136279	142758	138953	240471	270147	256981	1	1	1	286097	276954	281039	1	1	1	1	1	1	178637	194857	182749	1	1	1	1	1	1	1	1	1	1	1	1	179765	135487	171680	50049	42392	50065	157425	163485	133611	1
DG(16:0/0:0/18:3n3)	1	1	1	1	1	1	136279	142758	138953	240471	270147	256981	1	1	1	286097	276954	281039	1	1	1	1	1	1	178637	194857	182749	1	1	1	1	1	1	1	1	1	1	1	1	179765	135487	171680	50049	42392	50065	157425	163485	133611	1
DG(14:0/20:3(5Z,8Z,11Z)/0:0)	1	1	1	1	1	1	136279	142758	138953	240471	270147	256981	1	1	1	286097	276954	281039	1	1	1	1	1	1	178637	194857	182749	1	1	1	1	1	1	1	1	1	1	1	1	179765	135487	171680	50049	42392	50065	157425	163485	133611	1
DG(18:3(6Z,9Z,12Z)/16:0/0:0)[iso2]	1	1	1	1	1	1	136279	142758	138953	240471	270147	256981	1	1	1	286097	276954	281039	1	1	1	1	1	1	178637	194857	182749	1	1	1	1	1	1	1	1	1	1	1	1	179765	135487	171680	50049	42392	50065	157425	163485	133611	1
DG(14:1(9Z)/20:2(11Z,14Z)/0:0)	1	1	1	1	1	1	136279	142758	138953	240471	270147	256981	1	1	1	286097	276954	281039	1	1	1	1	1	1	178637	194857	182749	1	1	1	1	1	1	1	1	1	1	1	1	179765	135487	171680	50049	42392	50065	157425	163485	133611	1
DG(20:2(11Z,14Z)/14:1(9Z)/0:0)	1	1	1	1	1	1	136279	142758	138953	240471	270147	256981	1	1	1	286097	276954	281039	1	1	1	1	1	1	178637	194857	182749	1	1	1	1	1	1	1	1	1	1	1	1	179765	135487	171680	50049	42392	50065	157425	163485	133611	1
DG(18:3(9Z,12Z,15Z)/16:0/0:0)	1	1	1	1	1	1	136279	142758	138953	240471	270147	256981	1	1	1	286097	276954	281039	1	1	1	1	1	1	178637	194857	182749	1	1	1	1	1	1	1	1	1	1	1	1	179765	135487	171680	50049	42392	50065	157425	163485	133611	1
DG(16:1(9Z)/18:2(9Z,12Z)/0:0)[iso2]	1	1	1	1	1	1	136279	142758	138953	240471	270147	256981	1	1	1	286097	276954	281039	1	1	1	1	1	1	178637	194857	182749	1	1	1	1	1	1	1	1	1	1	1	1	179765	135487	171680	50049	42392	50065	157425	163485	133611	1
DG(20:3(8Z,11Z,14Z)/14:0/0:0)	1	1	1	1	1	1	136279	142758	138953	240471	270147	256981	1	1	1	286097	276954	281039	1	1	1	1	1	1	178637	194857	182749	1	1	1	1	1	1	1	1	1	1	1	1	179765	135487	171680	50049	42392	50065	157425	163485	133611	1
DG(14:0/20:3(8Z,11Z,14Z)/0:0)	1	1	1	1	1	1	136279	142758	138953	240471	270147	256981	1	1	1	286097	276954	281039	1	1	1	1	1	1	178637	194857	182749	1	1	1	1	1	1	1	1	1	1	1	1	179765	135487	171680	50049	42392	50065	157425	163485	133611	1
DG(14:1(9Z)/20:2(11Z,14Z)/0:0)[iso2]	1	1	1	1	1	1	136279	142758	138953	240471	270147	256981	1	1	1	286097	276954	281039	1	1	1	1	1	1	178637	194857	182749	1	1	1	1	1	1	1	1	1	1	1	1	179765	135487	171680	50049	42392	50065	157425	163485	133611	1
DG(18:2(9Z,12Z)/16:1(9Z)/0:0)	1	1	1	1	1	1	136279	142758	138953	240471	270147	256981	1	1	1	286097	276954	281039	1	1	1	1	1	1	178637	194857	182749	1	1	1	1	1	1	1	1	1	1	1	1	179765	135487	171680	50049	42392	50065	157425	163485	133611	1
DG(20:3(5Z,8Z,11Z)/14:0/0:0)	1	1	1	1	1	1	136279	142758	138953	240471	270147	256981	1	1	1	286097	276954	281039	1	1	1	1	1	1	178637	194857	182749	1	1	1	1	1	1	1	1	1	1	1	1	179765	135487	171680	50049	42392	50065	157425	163485	133611	1
DG(14:0/20:3(8Z,11Z,14Z)/0:0)[iso2]	1	1	1	1	1	1	136279	142758	138953	240471	270147	256981	1	1	1	286097	276954	281039	1	1	1	1	1	1	178637	194857	182749	1	1	1	1	1	1	1	1	1	1	1	1	179765	135487	171680	50049	42392	50065	157425	163485	133611	1
DG(14:1n5/0:0/20:2n6)	1	1	1	1	1	1	136279	142758	138953	240471	270147	256981	1	1	1	286097	276954	281039	1	1	1	1	1	1	178637	194857	182749	1	1	1	1	1	1	1	1	1	1	1	1	179765	135487	171680	50049	42392	50065	157425	163485	133611	1
DG(16:1(9Z)/18:2(9Z,12Z)/0:0)	1	1	1	1	1	1	136279	142758	138953	240471	270147	256981	1	1	1	286097	276954	281039	1	1	1	1	1	1	178637	194857	182749	1	1	1	1	1	1	1	1	1	1	1	1	179765	135487	171680	50049	42392	50065	157425	163485	133611	1
DG(16:0/18:3(9Z,12Z,15Z)/0:0)	1	1	1	1	1	1	136279	142758	138953	240471	270147	256981	1	1	1	286097	276954	281039	1	1	1	1	1	1	178637	194857	182749	1	1	1	1	1	1	1	1	1	1	1	1	179765	135487	171680	50049	42392	50065	157425	163485	133611	1
DG(16:0/18:3(9Z,12Z,15Z)/0:0)[iso2]	1	1	1	1	1	1	136279	142758	138953	240471	270147	256981	1	1	1	286097	276954	281039	1	1	1	1	1	1	178637	194857	182749	1	1	1	1	1	1	1	1	1	1	1	1	179765	135487	171680	50049	42392	50065	157425	163485	133611	1
Zeaxanthin	1	1	1	1	1	1	1	1	1	1	1	1	1	1	1	1	1	1	1	1	1	1	1	1	1	1	1	1	1	1	1	1	1	1	1	1	1	1	1	1	1	1	1	1	1	1	1	1	1
(3R,3'R,6'R,9-cis)-Carotene-3,3'-diol	1	1	1	1	1	1	1	1	1	1	1	1	1	1	1	1	1	1	1	1	1	1	1	1	1	1	1	1	1	1	1	1	1	1	1	1	1	1	1	1	1	1	1	1	1	1	1	1	1
3-cis-Hydroxy-b,e-Caroten-3'-one	1	1	1	1	1	1	1	1	1	1	1	1	1	1	1	1	1	1	1	1	1	1	1	1	1	1	1	1	1	1	1	1	1	1	1	1	1	1	1	1	1	1	1	1	1	1	1	1	1
(3R,3'R,13-cis)-b,b-Carotene-3,3'-diol	1	1	1	1	1	1	1	1	1	1	1	1	1	1	1	1	1	1	1	1	1	1	1	1	1	1	1	1	1	1	1	1	1	1	1	1	1	1	1	1	1	1	1	1	1	1	1	1	1
(3R,3'R,6'R,9'-cis)-b,e-Carotene-3,3'-diol	1	1	1	1	1	1	1	1	1	1	1	1	1	1	1	1	1	1	1	1	1	1	1	1	1	1	1	1	1	1	1	1	1	1	1	1	1	1	1	1	1	1	1	1	1	1	1	1	1
(3R,3'R,15-cis)-b,b-Carotene-3,3'-diol	1	1	1	1	1	1	1	1	1	1	1	1	1	1	1	1	1	1	1	1	1	1	1	1	1	1	1	1	1	1	1	1	1	1	1	1	1	1	1	1	1	1	1	1	1	1	1	1	1
(3R,3'R,9-cis)-b,b-Carotene-3,3'-diol	1	1	1	1	1	1	1	1	1	1	1	1	1	1	1	1	1	1	1	1	1	1	1	1	1	1	1	1	1	1	1	1	1	1	1	1	1	1	1	1	1	1	1	1	1	1	1	1	1
(3R,3'R,6'R,13-cis)-b,e-Carotene-3,3'-diol	1	1	1	1	1	1	1	1	1	1	1	1	1	1	1	1	1	1	1	1	1	1	1	1	1	1	1	1	1	1	1	1	1	1	1	1	1	1	1	1	1	1	1	1	1	1	1	1	1
(3R,3'S,6'R)-b,e-Carotene-3,3'-diol	1	1	1	1	1	1	1	1	1	1	1	1	1	1	1	1	1	1	1	1	1	1	1	1	1	1	1	1	1	1	1	1	1	1	1	1	1	1	1	1	1	1	1	1	1	1	1	1	1
Lutein	1	1	1	1	1	1	1	1	1	1	1	1	1	1	1	1	1	1	1	1	1	1	1	1	1	1	1	1	1	1	1	1	1	1	1	1	1	1	1	1	1	1	1	1	1	1	1	1	1
2-Hexaprenyl-3-methyl-5-hydroxy-6-methoxy-1,4-benzoquinone	536465	498560	494432	1	1	1	1	1	1	4890397	4921003	1	1031948	997545	1036785	77835	76705	5417523	383699	365596	402807	1102484	1108221	1089961	1	1	1	1	1	1	479376	484621	508574	1	1	1	1	1	1	1	1	1	1	1	1	1	1	1	1
3-Hexaprenyl-4-hydroxy-5-methoxybenzoic acid	536465	498560	494432	1	1	1	1	1	1	4890397	4921003	1	1031948	997545	1036785	1	1	5417523	383699	365596	402807	1102484	1108221	1089961	1	1	1	1	1	1	1	1	1	1	1	1	1	1	1	1	1	1	1	1	1	1	1	1	1
DG(16:0/18:2(9Z,12Z)/0:0)	1	146030	141956	327885	368007	363398	1925381	1938275	1948998	3361132	3493640	3465931	272567	278012	286145	3506584	3432264	3466447	1	1	1	211322	222940	213387	2181044	2254038	2240704	250811	199489	245911	1	1	1	424353	428774	437370	338245	371059	396670	2367391	2007935	2284418	1162092	1154544	1174323	2536028	2555952	2222483	324366
DG(14:0/20:2(11Z,14Z)/0:0)	1	146030	141956	327885	368007	363398	1925381	1938275	1948998	3361132	3493640	3465931	272567	278012	286145	3506584	3432264	3466447	1	1	1	211322	222940	213387	2181044	2254038	2240704	250811	199489	245911	1	1	1	424353	428774	437370	338245	371059	396670	2367391	2007935	2284418	1162092	1154544	1174323	2536028	2555952	2222483	324366
DG(14:1(9Z)/20:1(11Z)/0:0)	1	146030	141956	327885	368007	363398	1925381	1938275	1948998	3361132	3493640	3465931	272567	278012	286145	3506584	3432264	3466447	1	1	1	211322	222940	213387	2181044	2254038	2240704	250811	199489	245911	1	1	1	424353	428774	437370	338245	371059	396670	2367391	2007935	2284418	1162092	1154544	1174323	2536028	2555952	2222483	324366
DG(14:0/0:0/20:2n6)	1	146030	141956	327885	368007	363398	1925381	1938275	1948998	3361132	3493640	3465931	272567	278012	286145	3506584	3432264	3466447	1	1	1	211322	222940	213387	2181044	2254038	2240704	250811	199489	245911	1	1	1	424353	428774	437370	338245	371059	396670	2367391	2007935	2284418	1162092	1154544	1174323	2536028	2555952	2222483	324366
DG(20:2(11Z,14Z)/14:0/0:0)	1	146030	141956	327885	368007	363398	1925381	1938275	1948998	3361132	3493640	3465931	272567	278012	286145	3506584	3432264	3466447	1	1	1	211322	222940	213387	2181044	2254038	2240704	250811	199489	245911	1	1	1	424353	428774	437370	338245	371059	396670	2367391	2007935	2284418	1162092	1154544	1174323	2536028	2555952	2222483	324366
DG(18:2(9Z,12Z)/16:0/0:0)	1	146030	141956	327885	368007	363398	1925381	1938275	1948998	3361132	3493640	3465931	272567	278012	286145	3506584	3432264	3466447	1	1	1	211322	222940	213387	2181044	2254038	2240704	250811	199489	245911	1	1	1	424353	428774	437370	338245	371059	396670	2367391	2007935	2284418	1162092	1154544	1174323	2536028	2555952	2222483	324366
DG(16:1(9Z)/18:1(11Z)/0:0)	1	146030	141956	327885	368007	363398	1925381	1938275	1948998	3361132	3493640	3465931	272567	278012	286145	3506584	3432264	3466447	1	1	1	211322	222940	213387	2181044	2254038	2240704	250811	199489	245911	1	1	1	424353	428774	437370	338245	371059	396670	2367391	2007935	2284418	1162092	1154544	1174323	2536028	2555952	2222483	324366
DG(16:1n7/0:0/18:1n9)	1	146030	141956	327885	368007	363398	1925381	1938275	1948998	3361132	3493640	3465931	272567	278012	286145	3506584	3432264	3466447	1	1	1	211322	222940	213387	2181044	2254038	2240704	250811	199489	245911	1	1	1	424353	428774	437370	338245	371059	396670	2367391	2007935	2284418	1162092	1154544	1174323	2536028	2555952	2222483	324366
DG(16:1n7/0:0/18:1n7)	1	146030	141956	327885	368007	363398	1925381	1938275	1948998	3361132	3493640	3465931	272567	278012	286145	3506584	3432264	3466447	1	1	1	211322	222940	213387	2181044	2254038	2240704	250811	199489	245911	1	1	1	424353	428774	437370	338245	371059	396670	2367391	2007935	2284418	1162092	1154544	1174323	2536028	2555952	2222483	324366
DG(18:1(9Z)/16:1(9Z)/0:0)	1	146030	141956	327885	368007	363398	1925381	1938275	1948998	3361132	3493640	3465931	272567	278012	286145	3506584	3432264	3466447	1	1	1	211322	222940	213387	2181044	2254038	2240704	250811	199489	245911	1	1	1	424353	428774	437370	338245	371059	396670	2367391	2007935	2284418	1162092	1154544	1174323	2536028	2555952	2222483	324366
DG(14:1n5/0:0/20:1n9)	1	146030	141956	327885	368007	363398	1925381	1938275	1948998	3361132	3493640	3465931	272567	278012	286145	3506584	3432264	3466447	1	1	1	211322	222940	213387	2181044	2254038	2240704	250811	199489	245911	1	1	1	424353	428774	437370	338245	371059	396670	2367391	2007935	2284418	1162092	1154544	1174323	2536028	2555952	2222483	324366
DG(16:1(9Z)/18:1(9Z)/0:0)	1	146030	141956	327885	368007	363398	1925381	1938275	1948998	3361132	3493640	3465931	272567	278012	286145	3506584	3432264	3466447	1	1	1	211322	222940	213387	2181044	2254038	2240704	250811	199489	245911	1	1	1	424353	428774	437370	338245	371059	396670	2367391	2007935	2284418	1162092	1154544	1174323	2536028	2555952	2222483	324366
DG(20:1(11Z)/14:1(9Z)/0:0)	1	146030	141956	327885	368007	363398	1925381	1938275	1948998	3361132	3493640	3465931	272567	278012	286145	3506584	3432264	3466447	1	1	1	211322	222940	213387	2181044	2254038	2240704	250811	199489	245911	1	1	1	424353	428774	437370	338245	371059	396670	2367391	2007935	2284418	1162092	1154544	1174323	2536028	2555952	2222483	324366
DG(18:1(11Z)/16:1(9Z)/0:0)	1	146030	141956	327885	368007	363398	1925381	1938275	1948998	3361132	3493640	3465931	272567	278012	286145	3506584	3432264	3466447	1	1	1	211322	222940	213387	2181044	2254038	2240704	250811	199489	245911	1	1	1	424353	428774	437370	338245	371059	396670	2367391	2007935	2284418	1162092	1154544	1174323	2536028	2555952	2222483	324366
DG(15:0/0:0/18:2n6)	1	146030	141956	327885	368007	363398	1925381	1938275	1948998	3361132	3493640	3465931	272567	278012	286145	3506584	3432264	3466447	1	1	1	211322	222940	213387	2181044	2254038	2240704	250811	199489	245911	1	1	1	424353	428774	437370	338245	371059	396670	2367391	2007935	2284418	1162092	1154544	1174323	2536028	2555952	2222483	324366
2-Hexaprenyl-3-methyl-5-hydroxy-6-methoxy-1,4-benzoquinol	1	1	1	1	1	1	986184	998463	1009497	1147194	1	1148844	1	1	1	1	1262839	1300747	1	1	1	1	1	1	928229	955034	935042	1	1	1	1	1	1	1	1	1	1	1	1	951521	948546	919442	679226	685302	697953	1038869	1073388	1159962	1
Cer(t18:0/16:0)	1	1	1	1	1	1	1	1	1	1	1	1	1	1	1	209555	1	1	1	1	1	1	1	1	1	1	1	1	1	1	1	1	1	1	1	1	1	1	1	1	49426	1	1	1	1	1	1	1	1
Ceramide (t18:0/16:0)	1	1	1	1	1	1	1	1	1	1	1	1	1	1	1	209555	1	1	1	1	1	1	1	1	1	1	1	1	1	1	1	1	1	1	1	1	1	1	1	1	49426	1	1	1	1	1	1	1	1
DG(15:0/18:3(6Z,9Z,12Z)/0:0)	1	1	1	1	1	1	1	1	1	1	1	1	1	1	1	1	1	1	1	1	1	1	1	1	1	1	1	1	1	1	1	1	1	1	1	1	1	1	1	1	1	1	1	1	1	1	1	1	1
DG(14:1n5/0:0/18:2n6)	1	1	1	1	1	1	1	1	1	1	1	1	1	1	1	1	1	1	1	1	1	1	1	1	1	1	1	1	1	1	1	1	1	1	1	1	1	1	1	1	1	1	1	1	1	1	1	1	1
DG(18:3(6Z,9Z,12Z)/15:0/0:0)	1	1	1	1	1	1	1	1	1	1	1	1	1	1	1	1	1	1	1	1	1	1	1	1	1	1	1	1	1	1	1	1	1	1	1	1	1	1	1	1	1	1	1	1	1	1	1	1	1
DG(15:0/0:0/18:3n3)	1	1	1	1	1	1	1	1	1	1	1	1	1	1	1	1	1	1	1	1	1	1	1	1	1	1	1	1	1	1	1	1	1	1	1	1	1	1	1	1	1	1	1	1	1	1	1	1	1
DG(15:0/18:3(9Z,12Z,15Z)/0:0)	1	1	1	1	1	1	1	1	1	1	1	1	1	1	1	1	1	1	1	1	1	1	1	1	1	1	1	1	1	1	1	1	1	1	1	1	1	1	1	1	1	1	1	1	1	1	1	1	1
DG(15:0/0:0/18:3n6)	1	1	1	1	1	1	1	1	1	1	1	1	1	1	1	1	1	1	1	1	1	1	1	1	1	1	1	1	1	1	1	1	1	1	1	1	1	1	1	1	1	1	1	1	1	1	1	1	1
DG(18:3(9Z,12Z,15Z)/15:0/0:0)	1	1	1	1	1	1	1	1	1	1	1	1	1	1	1	1	1	1	1	1	1	1	1	1	1	1	1	1	1	1	1	1	1	1	1	1	1	1	1	1	1	1	1	1	1	1	1	1	1
DG(18:2(9Z,12Z)/15:0/0:0)	1	1	1	1	1	1	1	1	1	1	1	1	1	1	1	1	1	1	1	1	1	1	1	1	1	1	1	1	1	1	1	1	1	1	1	1	1	1	1	1	1	1	1	1	1	1	1	1	1
DG(15:0/18:2(9Z,12Z)/0:0)	1	1	1	1	1	1	1	1	1	1	1	1	1	1	1	1	1	1	1	1	1	1	1	1	1	1	1	1	1	1	1	1	1	1	1	1	1	1	1	1	1	1	1	1	1	1	1	1	1
DG(14:0/0:0/18:2n6)	1	1	1	1	1	1	1	1	1	1	1	1	1	1	1	1	1	1	1	1	1	1	1	1	1	1	1	1	1	1	1	1	1	1	1	1	1	1	1	1	1	1	1	1	1	1	1	1	1
DG(15:0/20:5(5Z,8Z,11Z,14Z,17Z)/0:0)	1056635	1031647	1006336	2578526	2639188	2605361	4923644	4929664	5066180	5417075	5414754	5370056	1869596	1842011	1893761	5670073	5620063	5726523	836959	765348	827838	1801575	1824050	1851406	4487878	4546609	4521454	1702059	1690293	1725426	950218	946878	976360	2226090	2312549	2319521	2243987	2235427	2268830	4873429	4986399	4899160	3995627	4047040	4080894	4939586	4994335	5247365	1959625
DG(20:5(5Z,8Z,11Z,14Z,17Z)/15:0/0:0)	1056635	1031647	1006336	2578526	2639188	2605361	4923644	4929664	5066180	5417075	5414754	5370056	1869596	1842011	1893761	5670073	5620063	5726523	836959	765348	827838	1801575	1824050	1851406	4487878	4546609	4521454	1702059	1690293	1725426	950218	946878	976360	2226090	2312549	2319521	2243987	2235427	2268830	4873429	4986399	4899160	3995627	4047040	4080894	4939586	4994335	5247365	1959625
DG(15:0/0:0/20:5n3)	1056635	1031647	1006336	2578526	2639188	2605361	4923644	4929664	5066180	5417075	5414754	5370056	1869596	1842011	1893761	5670073	5620063	5726523	836959	765348	827838	1801575	1824050	1851406	4487878	4546609	4521454	1702059	1690293	1725426	950218	946878	976360	2226090	2312549	2319521	2243987	2235427	2268830	4873429	4986399	4899160	3995627	4047040	4080894	4939586	4994335	5247365	1959625
DG(15:0/0:0/18:1n9)	1	1	1	1	1	1	240456	246885	246339	372633	402688	395616	1	1	1	400523	390727	407350	1	1	1	1	1	1	228834	246447	234057	1	1	1	1	1	1	1	1	1	1	1	1	208627	1	1	1	1	1	259689	271926	224477	1
DG(15:0/0:0/18:1n7)	1	1	1	1	1	1	240456	246885	246339	372633	402688	395616	1	1	1	400523	390727	407350	1	1	1	1	1	1	228834	246447	234057	1	1	1	1	1	1	1	1	1	1	1	1	208627	1	1	1	1	1	259689	271926	224477	1
DG(15:0/18:1(11Z)/0:0)	1	1	1	1	1	1	240456	246885	246339	372633	402688	395616	1	1	1	400523	390727	407350	1	1	1	1	1	1	228834	246447	234057	1	1	1	1	1	1	1	1	1	1	1	1	208627	1	1	1	1	1	259689	271926	224477	1
DG(15:0/18:1(9Z)/0:0)	1	1	1	1	1	1	240456	246885	246339	372633	402688	395616	1	1	1	400523	390727	407350	1	1	1	1	1	1	228834	246447	234057	1	1	1	1	1	1	1	1	1	1	1	1	208627	1	1	1	1	1	259689	271926	224477	1
DG(18:1(11Z)/15:0/0:0)	1	1	1	1	1	1	240456	246885	246339	372633	402688	395616	1	1	1	400523	390727	407350	1	1	1	1	1	1	228834	246447	234057	1	1	1	1	1	1	1	1	1	1	1	1	208627	1	1	1	1	1	259689	271926	224477	1
DG(18:1(9Z)/15:0/0:0)	1	1	1	1	1	1	240456	246885	246339	372633	402688	395616	1	1	1	400523	390727	407350	1	1	1	1	1	1	228834	246447	234057	1	1	1	1	1	1	1	1	1	1	1	1	208627	1	1	1	1	1	259689	271926	224477	1
DG(15:0/20:4(8Z,11Z,14Z,17Z)/0:0)	1	1	1	1	1	1	240456	246885	246339	366973	378007	381606	1	1	1	290670	390727	412864	1	1	1	1	1	1	228620	245776	233935	1	1	1	1	1	1	1	1	1	1	1	1	208627	1	1	1	1	1	262691	274059	223569	1
DG(20:4(8Z,11Z,14Z,17Z)/15:0/0:0)	1	1	1	1	1	1	240456	246885	246339	366973	378007	381606	1	1	1	290670	390727	412864	1	1	1	1	1	1	228620	245776	233935	1	1	1	1	1	1	1	1	1	1	1	1	208627	1	1	1	1	1	262691	274059	223569	1
DG(15:0/20:4(5Z,8Z,11Z,14Z)/0:0)	1	1	1	1	1	1	240456	246885	246339	366973	378007	381606	1	1	1	290670	390727	412864	1	1	1	1	1	1	228620	245776	233935	1	1	1	1	1	1	1	1	1	1	1	1	208627	1	1	1	1	1	262691	274059	223569	1
DG(20:4(5Z,8Z,11Z,14Z)/15:0/0:0)	1	1	1	1	1	1	240456	246885	246339	366973	378007	381606	1	1	1	290670	390727	412864	1	1	1	1	1	1	228620	245776	233935	1	1	1	1	1	1	1	1	1	1	1	1	208627	1	1	1	1	1	262691	274059	223569	1
DG(15:0/0:0/20:4n3)	1	1	1	1	1	1	240456	246885	246339	366973	378007	381606	1	1	1	290670	390727	412864	1	1	1	1	1	1	228620	245776	233935	1	1	1	1	1	1	1	1	1	1	1	1	208627	1	1	1	1	1	262691	274059	223569	1
DG(15:0/0:0/20:4n6)	1	1	1	1	1	1	240456	246885	246339	366973	378007	381606	1	1	1	290670	390727	412864	1	1	1	1	1	1	228620	245776	233935	1	1	1	1	1	1	1	1	1	1	1	1	208627	1	1	1	1	1	262691	274059	223569	1
DG(18:4n3/0:0/18:4n3)	1	1	1	1	1	1	1	1	201112	247585	275576	255966	1	1	1	257864	243585	232874	1	1	1	1	1	1	1	176392	1	1	1	1	1	1	1	1	1	1	1	1	1	1	1	1	1	1	1	1	202219	223482	1
DG(18:4(6Z,9Z,12Z,15Z)/18:4(6Z,9Z,12Z,15Z)/0:0)	1	1	1	1	1	1	1	1	201112	247585	275576	255966	1	1	1	257864	243585	232874	1	1	1	1	1	1	1	176392	1	1	1	1	1	1	1	1	1	1	1	1	1	1	1	1	1	1	1	1	202219	223482	1
CE(12:0)	1	1	1	1	1	1	1	1	1	1	1	1	1	1	1	1	1	1	1	1	1	1	1	1	1	1	1	1	1	1	1	1	1	1	1	1	1	1	1	1	1	1	1	1	1	1	1	1	1
DG(18:3n3/0:0/18:4n3)	1	1	1	1	1	1	1	1	1	1	1	1	1	1	1	1	1	1	1	1	1	1	1	1	1	1	1	1	1	1	1	1	1	1	1	1	1	1	1	1	1	1	1	1	1	1	1	1	1
Ubiquinol-6	1	1	1	1	1	1	1	1	1	1	1	1	1	1	1	1	1	1	1	1	1	1	1	1	1	1	1	1	1	1	1	1	1	1	1	1	1	1	1	1	1	1	1	1	1	1	1	1	1
DG(18:3(6Z,9Z,12Z)/18:3(6Z,9Z,12Z)/0:0)	1	1	1	1	1	1	136279	135917	138953	240471	234341	256981	1	1	1	245122	276954	268605	1	1	1	1	1	1	1	1	1	1	1	1	1	1	1	1	1	1	1	1	1	173740	1	171680	1	1	1	157425	163485	133611	1
DG(18:3(6Z,9Z,12Z)/18:3(9Z,12Z,15Z)/0:0)	1	1	1	1	1	1	136279	135917	138953	240471	234341	256981	1	1	1	245122	276954	268605	1	1	1	1	1	1	1	1	1	1	1	1	1	1	1	1	1	1	1	1	1	173740	1	171680	1	1	1	157425	163485	133611	1
DG(18:2(9Z,12Z)/18:4(6Z,9Z,12Z,15Z)/0:0)	1	1	1	1	1	1	136279	135917	138953	240471	234341	256981	1	1	1	245122	276954	268605	1	1	1	1	1	1	1	1	1	1	1	1	1	1	1	1	1	1	1	1	1	173740	1	171680	1	1	1	157425	163485	133611	1
DG(16:1n7/0:0/20:5n3)	1	1	1	1	1	1	136279	135917	138953	240471	234341	256981	1	1	1	245122	276954	268605	1	1	1	1	1	1	1	1	1	1	1	1	1	1	1	1	1	1	1	1	1	173740	1	171680	1	1	1	157425	163485	133611	1
DG(18:4(6Z,9Z,12Z,15Z)/18:2(9Z,12Z)/0:0)	1	1	1	1	1	1	136279	135917	138953	240471	234341	256981	1	1	1	245122	276954	268605	1	1	1	1	1	1	1	1	1	1	1	1	1	1	1	1	1	1	1	1	1	173740	1	171680	1	1	1	157425	163485	133611	1
DG(14:1n5/0:0/22:5n3)	1	1	1	1	1	1	136279	135917	138953	240471	234341	256981	1	1	1	245122	276954	268605	1	1	1	1	1	1	1	1	1	1	1	1	1	1	1	1	1	1	1	1	1	173740	1	171680	1	1	1	157425	163485	133611	1
DG(14:1n5/0:0/22:5n6)	1	1	1	1	1	1	136279	135917	138953	240471	234341	256981	1	1	1	245122	276954	268605	1	1	1	1	1	1	1	1	1	1	1	1	1	1	1	1	1	1	1	1	1	173740	1	171680	1	1	1	157425	163485	133611	1
DG(14:0/0:0/22:6n3)	1	1	1	1	1	1	136279	135917	138953	240471	234341	256981	1	1	1	245122	276954	268605	1	1	1	1	1	1	1	1	1	1	1	1	1	1	1	1	1	1	1	1	1	173740	1	171680	1	1	1	157425	163485	133611	1
DG(20:5(5Z,8Z,11Z,14Z,17Z)/16:1(9Z)/0:0)	1	1	1	1	1	1	136279	135917	138953	240471	234341	256981	1	1	1	245122	276954	268605	1	1	1	1	1	1	1	1	1	1	1	1	1	1	1	1	1	1	1	1	1	173740	1	171680	1	1	1	157425	163485	133611	1
DG(18:3n6/0:0/18:3n6)	1	1	1	1	1	1	136279	135917	138953	240471	234341	256981	1	1	1	245122	276954	268605	1	1	1	1	1	1	1	1	1	1	1	1	1	1	1	1	1	1	1	1	1	173740	1	171680	1	1	1	157425	163485	133611	1
DG(22:6(4Z,7Z,10Z,13Z,16Z,19Z)/14:0/0:0)	1	1	1	1	1	1	136279	135917	138953	240471	234341	256981	1	1	1	245122	276954	268605	1	1	1	1	1	1	1	1	1	1	1	1	1	1	1	1	1	1	1	1	1	173740	1	171680	1	1	1	157425	163485	133611	1
DG(18:3n6/0:0/18:3n3)	1	1	1	1	1	1	136279	135917	138953	240471	234341	256981	1	1	1	245122	276954	268605	1	1	1	1	1	1	1	1	1	1	1	1	1	1	1	1	1	1	1	1	1	173740	1	171680	1	1	1	157425	163485	133611	1
DG(22:5(7Z,10Z,13Z,16Z,19Z)/14:1(9Z)/0:0)	1	1	1	1	1	1	136279	135917	138953	240471	234341	256981	1	1	1	245122	276954	268605	1	1	1	1	1	1	1	1	1	1	1	1	1	1	1	1	1	1	1	1	1	173740	1	171680	1	1	1	157425	163485	133611	1
DG(18:3(9Z,12Z,15Z)/18:3(9Z,12Z,15Z)/0:0)	1	1	1	1	1	1	136279	135917	138953	240471	234341	256981	1	1	1	245122	276954	268605	1	1	1	1	1	1	1	1	1	1	1	1	1	1	1	1	1	1	1	1	1	173740	1	171680	1	1	1	157425	163485	133611	1
DG(16:1(9Z)/20:5(5Z,8Z,11Z,14Z,17Z)/0:0)	1	1	1	1	1	1	136279	135917	138953	240471	234341	256981	1	1	1	245122	276954	268605	1	1	1	1	1	1	1	1	1	1	1	1	1	1	1	1	1	1	1	1	1	173740	1	171680	1	1	1	157425	163485	133611	1
DG(14:1(9Z)/22:5(7Z,10Z,13Z,16Z,19Z)/0:0)	1	1	1	1	1	1	136279	135917	138953	240471	234341	256981	1	1	1	245122	276954	268605	1	1	1	1	1	1	1	1	1	1	1	1	1	1	1	1	1	1	1	1	1	173740	1	171680	1	1	1	157425	163485	133611	1
DG(18:3(9Z,12Z,15Z)/18:3(6Z,9Z,12Z)/0:0)	1	1	1	1	1	1	136279	135917	138953	240471	234341	256981	1	1	1	245122	276954	268605	1	1	1	1	1	1	1	1	1	1	1	1	1	1	1	1	1	1	1	1	1	173740	1	171680	1	1	1	157425	163485	133611	1
DG(14:0/22:6(4Z,7Z,10Z,13Z,16Z,19Z)/0:0)	1	1	1	1	1	1	136279	135917	138953	240471	234341	256981	1	1	1	245122	276954	268605	1	1	1	1	1	1	1	1	1	1	1	1	1	1	1	1	1	1	1	1	1	173740	1	171680	1	1	1	157425	163485	133611	1
DG(22:5(4Z,7Z,10Z,13Z,16Z)/14:1(9Z)/0:0)	1	1	1	1	1	1	136279	135917	138953	240471	234341	256981	1	1	1	245122	276954	268605	1	1	1	1	1	1	1	1	1	1	1	1	1	1	1	1	1	1	1	1	1	173740	1	171680	1	1	1	157425	163485	133611	1
DG(14:1(9Z)/22:5(4Z,7Z,10Z,13Z,16Z)/0:0)	1	1	1	1	1	1	136279	135917	138953	240471	234341	256981	1	1	1	245122	276954	268605	1	1	1	1	1	1	1	1	1	1	1	1	1	1	1	1	1	1	1	1	1	173740	1	171680	1	1	1	157425	163485	133611	1
DG(18:3n3/0:0/18:3n3)	1	1	1	1	1	1	136279	135917	138953	240471	234341	256981	1	1	1	245122	276954	268605	1	1	1	1	1	1	1	1	1	1	1	1	1	1	1	1	1	1	1	1	1	173740	1	171680	1	1	1	157425	163485	133611	1
DG(18:1n9/0:0/18:3n3)	746146	738248	728944	2248679	2477089	2468891	8114545	8090029	8215341	10561567	10597680	10603672	1568862	1586630	1658688	11125005	11505925	11632482	482438	442042	481617	1354651	1412767	1420454	7444474	7556133	7640014	1273638	1067732	1249775	561278	554125	578405	1981370	2017645	2006981	1756876	1907248	1973444	7988333	7232850	7880053	5143702	5240270	5256165	8743298	8731849	8053194	1500441
DG(18:2(9Z,12Z)/18:2(9Z,12Z)/0:0)	746146	738248	728944	2248679	2477089	2468891	8114545	8090029	8215341	10561567	10597680	10603672	1568862	1586630	1658688	11125005	11505925	11632482	482438	442042	481617	1354651	1412767	1420454	7444474	7556133	7640014	1273638	1067732	1249775	561278	554125	578405	1981370	2017645	2006981	1756876	1907248	1973444	7988333	7232850	7880053	5143702	5240270	5256165	8743298	8731849	8053194	1500441
DG(18:4(6Z,9Z,12Z,15Z)/18:0/0:0)	746146	738248	728944	2248679	2477089	2468891	8114545	8090029	8215341	10561567	10597680	10603672	1568862	1586630	1658688	11125005	11505925	11632482	482438	442042	481617	1354651	1412767	1420454	7444474	7556133	7640014	1273638	1067732	1249775	561278	554125	578405	1981370	2017645	2006981	1756876	1907248	1973444	7988333	7232850	7880053	5143702	5240270	5256165	8743298	8731849	8053194	1500441
DG(16:1(9Z)/20:3(8Z,11Z,14Z)/0:0)	746146	738248	728944	2248679	2477089	2468891	8114545	8090029	8215341	10561567	10597680	10603672	1568862	1586630	1658688	11125005	11505925	11632482	482438	442042	481617	1354651	1412767	1420454	7444474	7556133	7640014	1273638	1067732	1249775	561278	554125	578405	1981370	2017645	2006981	1756876	1907248	1973444	7988333	7232850	7880053	5143702	5240270	5256165	8743298	8731849	8053194	1500441
DG(18:1(9Z)/18:3(9Z,12Z,15Z)/0:0)	746146	738248	728944	2248679	2477089	2468891	8114545	8090029	8215341	10561567	10597680	10603672	1568862	1586630	1658688	11125005	11505925	11632482	482438	442042	481617	1354651	1412767	1420454	7444474	7556133	7640014	1273638	1067732	1249775	561278	554125	578405	1981370	2017645	2006981	1756876	1907248	1973444	7988333	7232850	7880053	5143702	5240270	5256165	8743298	8731849	8053194	1500441
DG(16:0/20:4(5Z,8Z,11Z,14Z)/0:0)	746146	738248	728944	2248679	2477089	2468891	8114545	8090029	8215341	10561567	10597680	10603672	1568862	1586630	1658688	11125005	11505925	11632482	482438	442042	481617	1354651	1412767	1420454	7444474	7556133	7640014	1273638	1067732	1249775	561278	554125	578405	1981370	2017645	2006981	1756876	1907248	1973444	7988333	7232850	7880053	5143702	5240270	5256165	8743298	8731849	8053194	1500441
DG(18:1(11Z)/18:3(6Z,9Z,12Z)/0:0)	746146	738248	728944	2248679	2477089	2468891	8114545	8090029	8215341	10561567	10597680	10603672	1568862	1586630	1658688	11125005	11505925	11632482	482438	442042	481617	1354651	1412767	1420454	7444474	7556133	7640014	1273638	1067732	1249775	561278	554125	578405	1981370	2017645	2006981	1756876	1907248	1973444	7988333	7232850	7880053	5143702	5240270	5256165	8743298	8731849	8053194	1500441
DG(22:4(7Z,10Z,13Z,16Z)/14:0/0:0)	746146	738248	728944	2248679	2477089	2468891	8114545	8090029	8215341	10561567	10597680	10603672	1568862	1586630	1658688	11125005	11505925	11632482	482438	442042	481617	1354651	1412767	1420454	7444474	7556133	7640014	1273638	1067732	1249775	561278	554125	578405	1981370	2017645	2006981	1756876	1907248	1973444	7988333	7232850	7880053	5143702	5240270	5256165	8743298	8731849	8053194	1500441
DG(16:0/20:4(8Z,11Z,14Z,17Z)/0:0)	746146	738248	728944	2248679	2477089	2468891	8114545	8090029	8215341	10561567	10597680	10603672	1568862	1586630	1658688	11125005	11505925	11632482	482438	442042	481617	1354651	1412767	1420454	7444474	7556133	7640014	1273638	1067732	1249775	561278	554125	578405	1981370	2017645	2006981	1756876	1907248	1973444	7988333	7232850	7880053	5143702	5240270	5256165	8743298	8731849	8053194	1500441
DG(18:3(9Z,12Z,15Z)/18:1(9Z)/0:0)	746146	738248	728944	2248679	2477089	2468891	8114545	8090029	8215341	10561567	10597680	10603672	1568862	1586630	1658688	11125005	11505925	11632482	482438	442042	481617	1354651	1412767	1420454	7444474	7556133	7640014	1273638	1067732	1249775	561278	554125	578405	1981370	2017645	2006981	1756876	1907248	1973444	7988333	7232850	7880053	5143702	5240270	5256165	8743298	8731849	8053194	1500441
DG(16:1(9Z)/20:3(5Z,8Z,11Z)/0:0)	746146	738248	728944	2248679	2477089	2468891	8114545	8090029	8215341	10561567	10597680	10603672	1568862	1586630	1658688	11125005	11505925	11632482	482438	442042	481617	1354651	1412767	1420454	7444474	7556133	7640014	1273638	1067732	1249775	561278	554125	578405	1981370	2017645	2006981	1756876	1907248	1973444	7988333	7232850	7880053	5143702	5240270	5256165	8743298	8731849	8053194	1500441
DG(18:0/0:0/18:4n3)	746146	738248	728944	2248679	2477089	2468891	8114545	8090029	8215341	10561567	10597680	10603672	1568862	1586630	1658688	11125005	11505925	11632482	482438	442042	481617	1354651	1412767	1420454	7444474	7556133	7640014	1273638	1067732	1249775	561278	554125	578405	1981370	2017645	2006981	1756876	1907248	1973444	7988333	7232850	7880053	5143702	5240270	5256165	8743298	8731849	8053194	1500441
DG(18:0/18:4(6Z,9Z,12Z,15Z)/0:0)	746146	738248	728944	2248679	2477089	2468891	8114545	8090029	8215341	10561567	10597680	10603672	1568862	1586630	1658688	11125005	11505925	11632482	482438	442042	481617	1354651	1412767	1420454	7444474	7556133	7640014	1273638	1067732	1249775	561278	554125	578405	1981370	2017645	2006981	1756876	1907248	1973444	7988333	7232850	7880053	5143702	5240270	5256165	8743298	8731849	8053194	1500441
DG(18:3(6Z,9Z,12Z)/18:1(11Z)/0:0)	746146	738248	728944	2248679	2477089	2468891	8114545	8090029	8215341	10561567	10597680	10603672	1568862	1586630	1658688	11125005	11505925	11632482	482438	442042	481617	1354651	1412767	1420454	7444474	7556133	7640014	1273638	1067732	1249775	561278	554125	578405	1981370	2017645	2006981	1756876	1907248	1973444	7988333	7232850	7880053	5143702	5240270	5256165	8743298	8731849	8053194	1500441
DG(18:1n7/0:0/18:3n3)	746146	738248	728944	2248679	2477089	2468891	8114545	8090029	8215341	10561567	10597680	10603672	1568862	1586630	1658688	11125005	11505925	11632482	482438	442042	481617	1354651	1412767	1420454	7444474	7556133	7640014	1273638	1067732	1249775	561278	554125	578405	1981370	2017645	2006981	1756876	1907248	1973444	7988333	7232850	7880053	5143702	5240270	5256165	8743298	8731849	8053194	1500441
DG(14:0/0:0/22:4n6)	746146	738248	728944	2248679	2477089	2468891	8114545	8090029	8215341	10561567	10597680	10603672	1568862	1586630	1658688	11125005	11505925	11632482	482438	442042	481617	1354651	1412767	1420454	7444474	7556133	7640014	1273638	1067732	1249775	561278	554125	578405	1981370	2017645	2006981	1756876	1907248	1973444	7988333	7232850	7880053	5143702	5240270	5256165	8743298	8731849	8053194	1500441
DG(18:1n7/0:0/18:3n6)	746146	738248	728944	2248679	2477089	2468891	8114545	8090029	8215341	10561567	10597680	10603672	1568862	1586630	1658688	11125005	11505925	11632482	482438	442042	481617	1354651	1412767	1420454	7444474	7556133	7640014	1273638	1067732	1249775	561278	554125	578405	1981370	2017645	2006981	1756876	1907248	1973444	7988333	7232850	7880053	5143702	5240270	5256165	8743298	8731849	8053194	1500441
DG(18:3(9Z,12Z,15Z)/18:1(11Z)/0:0)	746146	738248	728944	2248679	2477089	2468891	8114545	8090029	8215341	10561567	10597680	10603672	1568862	1586630	1658688	11125005	11505925	11632482	482438	442042	481617	1354651	1412767	1420454	7444474	7556133	7640014	1273638	1067732	1249775	561278	554125	578405	1981370	2017645	2006981	1756876	1907248	1973444	7988333	7232850	7880053	5143702	5240270	5256165	8743298	8731849	8053194	1500441
DG(20:4(8Z,11Z,14Z,17Z)/16:0/0:0)	746146	738248	728944	2248679	2477089	2468891	8114545	8090029	8215341	10561567	10597680	10603672	1568862	1586630	1658688	11125005	11505925	11632482	482438	442042	481617	1354651	1412767	1420454	7444474	7556133	7640014	1273638	1067732	1249775	561278	554125	578405	1981370	2017645	2006981	1756876	1907248	1973444	7988333	7232850	7880053	5143702	5240270	5256165	8743298	8731849	8053194	1500441
DG(14:0/22:4(7Z,10Z,13Z,16Z)/0:0)	746146	738248	728944	2248679	2477089	2468891	8114545	8090029	8215341	10561567	10597680	10603672	1568862	1586630	1658688	11125005	11505925	11632482	482438	442042	481617	1354651	1412767	1420454	7444474	7556133	7640014	1273638	1067732	1249775	561278	554125	578405	1981370	2017645	2006981	1756876	1907248	1973444	7988333	7232850	7880053	5143702	5240270	5256165	8743298	8731849	8053194	1500441
DG(18:1n9/0:0/18:3n6)	746146	738248	728944	2248679	2477089	2468891	8114545	8090029	8215341	10561567	10597680	10603672	1568862	1586630	1658688	11125005	11505925	11632482	482438	442042	481617	1354651	1412767	1420454	7444474	7556133	7640014	1273638	1067732	1249775	561278	554125	578405	1981370	2017645	2006981	1756876	1907248	1973444	7988333	7232850	7880053	5143702	5240270	5256165	8743298	8731849	8053194	1500441
DG(20:3(8Z,11Z,14Z)/16:1(9Z)/0:0)	746146	738248	728944	2248679	2477089	2468891	8114545	8090029	8215341	10561567	10597680	10603672	1568862	1586630	1658688	11125005	11505925	11632482	482438	442042	481617	1354651	1412767	1420454	7444474	7556133	7640014	1273638	1067732	1249775	561278	554125	578405	1981370	2017645	2006981	1756876	1907248	1973444	7988333	7232850	7880053	5143702	5240270	5256165	8743298	8731849	8053194	1500441
DG(16:0/0:0/20:4n6)	746146	738248	728944	2248679	2477089	2468891	8114545	8090029	8215341	10561567	10597680	10603672	1568862	1586630	1658688	11125005	11505925	11632482	482438	442042	481617	1354651	1412767	1420454	7444474	7556133	7640014	1273638	1067732	1249775	561278	554125	578405	1981370	2017645	2006981	1756876	1907248	1973444	7988333	7232850	7880053	5143702	5240270	5256165	8743298	8731849	8053194	1500441
DG(20:3(5Z,8Z,11Z)/16:1(9Z)/0:0)	746146	738248	728944	2248679	2477089	2468891	8114545	8090029	8215341	10561567	10597680	10603672	1568862	1586630	1658688	11125005	11505925	11632482	482438	442042	481617	1354651	1412767	1420454	7444474	7556133	7640014	1273638	1067732	1249775	561278	554125	578405	1981370	2017645	2006981	1756876	1907248	1973444	7988333	7232850	7880053	5143702	5240270	5256165	8743298	8731849	8053194	1500441
DG(16:0/0:0/20:4n3)	746146	738248	728944	2248679	2477089	2468891	8114545	8090029	8215341	10561567	10597680	10603672	1568862	1586630	1658688	11125005	11505925	11632482	482438	442042	481617	1354651	1412767	1420454	7444474	7556133	7640014	1273638	1067732	1249775	561278	554125	578405	1981370	2017645	2006981	1756876	1907248	1973444	7988333	7232850	7880053	5143702	5240270	5256165	8743298	8731849	8053194	1500441
DG(18:1(9Z)/18:3(6Z,9Z,12Z)/0:0)	746146	738248	728944	2248679	2477089	2468891	8114545	8090029	8215341	10561567	10597680	10603672	1568862	1586630	1658688	11125005	11505925	11632482	482438	442042	481617	1354651	1412767	1420454	7444474	7556133	7640014	1273638	1067732	1249775	561278	554125	578405	1981370	2017645	2006981	1756876	1907248	1973444	7988333	7232850	7880053	5143702	5240270	5256165	8743298	8731849	8053194	1500441
DG(18:3(6Z,9Z,12Z)/18:1(9Z)/0:0)	746146	738248	728944	2248679	2477089	2468891	8114545	8090029	8215341	10561567	10597680	10603672	1568862	1586630	1658688	11125005	11505925	11632482	482438	442042	481617	1354651	1412767	1420454	7444474	7556133	7640014	1273638	1067732	1249775	561278	554125	578405	1981370	2017645	2006981	1756876	1907248	1973444	7988333	7232850	7880053	5143702	5240270	5256165	8743298	8731849	8053194	1500441
DG(18:1(11Z)/18:3(9Z,12Z,15Z)/0:0)	746146	738248	728944	2248679	2477089	2468891	8114545	8090029	8215341	10561567	10597680	10603672	1568862	1586630	1658688	11125005	11505925	11632482	482438	442042	481617	1354651	1412767	1420454	7444474	7556133	7640014	1273638	1067732	1249775	561278	554125	578405	1981370	2017645	2006981	1756876	1907248	1973444	7988333	7232850	7880053	5143702	5240270	5256165	8743298	8731849	8053194	1500441
DG(16:1n7/0:0/20:3n6)	746146	738248	728944	2248679	2477089	2468891	8114545	8090029	8215341	10561567	10597680	10603672	1568862	1586630	1658688	11125005	11505925	11632482	482438	442042	481617	1354651	1412767	1420454	7444474	7556133	7640014	1273638	1067732	1249775	561278	554125	578405	1981370	2017645	2006981	1756876	1907248	1973444	7988333	7232850	7880053	5143702	5240270	5256165	8743298	8731849	8053194	1500441
DG(20:4(5Z,8Z,11Z,14Z)/16:0/0:0)	746146	738248	728944	2248679	2477089	2468891	8114545	8090029	8215341	10561567	10597680	10603672	1568862	1586630	1658688	11125005	11505925	11632482	482438	442042	481617	1354651	1412767	1420454	7444474	7556133	7640014	1273638	1067732	1249775	561278	554125	578405	1981370	2017645	2006981	1756876	1907248	1973444	7988333	7232850	7880053	5143702	5240270	5256165	8743298	8731849	8053194	1500441
DG(16:1n7/0:0/20:3n9)	746146	738248	728944	2248679	2477089	2468891	8114545	8090029	8215341	10561567	10597680	10603672	1568862	1586630	1658688	11125005	11505925	11632482	482438	442042	481617	1354651	1412767	1420454	7444474	7556133	7640014	1273638	1067732	1249775	561278	554125	578405	1981370	2017645	2006981	1756876	1907248	1973444	7988333	7232850	7880053	5143702	5240270	5256165	8743298	8731849	8053194	1500441
DG(20:0/14:1(9Z)/0:0)	746146	738248	728944	2248679	2477089	2474538	8278030	8272176	8257489	10798029	11047375	10930966	1596979	1651531	1698584	11984453	11770381	11835258	482438	442042	481617	1354651	1412767	1420454	7485055	7666953	7674942	1273638	1074248	1249775	561278	554125	578405	1981370	2017645	2006981	1756876	1907248	1984942	8075808	7273025	7894650	5167782	5240270	5274031	8783686	8823297	8096425	1500441
DG(18:1(11Z)/16:0/0:0)	746146	738248	728944	2248679	2477089	2474538	8278030	8272176	8257489	10798029	11047375	10930966	1596979	1651531	1698584	11984453	11770381	11835258	482438	442042	481617	1354651	1412767	1420454	7485055	7666953	7674942	1273638	1074248	1249775	561278	554125	578405	1981370	2017645	2006981	1756876	1907248	1984942	8075808	7273025	7894650	5167782	5240270	5274031	8783686	8823297	8096425	1500441
DG(16:0/18:1(11Z)/0:0)	746146	738248	728944	2248679	2477089	2474538	8278030	8272176	8257489	10798029	11047375	10930966	1596979	1651531	1698584	11984453	11770381	11835258	482438	442042	481617	1354651	1412767	1420454	7485055	7666953	7674942	1273638	1074248	1249775	561278	554125	578405	1981370	2017645	2006981	1756876	1907248	1984942	8075808	7273025	7894650	5167782	5240270	5274031	8783686	8823297	8096425	1500441
DG(14:0/20:1(11Z)/0:0)	746146	738248	728944	2248679	2477089	2474538	8278030	8272176	8257489	10798029	11047375	10930966	1596979	1651531	1698584	11984453	11770381	11835258	482438	442042	481617	1354651	1412767	1420454	7485055	7666953	7674942	1273638	1074248	1249775	561278	554125	578405	1981370	2017645	2006981	1756876	1907248	1984942	8075808	7273025	7894650	5167782	5240270	5274031	8783686	8823297	8096425	1500441
DG(18:1(11E)/16:0/0:0)	746146	738248	728944	2248679	2477089	2474538	8278030	8272176	8257489	10798029	11047375	10930966	1596979	1651531	1698584	11984453	11770381	11835258	482438	442042	481617	1354651	1412767	1420454	7485055	7666953	7674942	1273638	1074248	1249775	561278	554125	578405	1981370	2017645	2006981	1756876	1907248	1984942	8075808	7273025	7894650	5167782	5240270	5274031	8783686	8823297	8096425	1500441
DG(14:0/0:0/20:1n9)	746146	738248	728944	2248679	2477089	2474538	8278030	8272176	8257489	10798029	11047375	10930966	1596979	1651531	1698584	11984453	11770381	11835258	482438	442042	481617	1354651	1412767	1420454	7485055	7666953	7674942	1273638	1074248	1249775	561278	554125	578405	1981370	2017645	2006981	1756876	1907248	1984942	8075808	7273025	7894650	5167782	5240270	5274031	8783686	8823297	8096425	1500441
DG(16:0/18:1(9Z)/0:0)	746146	738248	728944	2248679	2477089	2474538	8278030	8272176	8257489	10798029	11047375	10930966	1596979	1651531	1698584	11984453	11770381	11835258	482438	442042	481617	1354651	1412767	1420454	7485055	7666953	7674942	1273638	1074248	1249775	561278	554125	578405	1981370	2017645	2006981	1756876	1907248	1984942	8075808	7273025	7894650	5167782	5240270	5274031	8783686	8823297	8096425	1500441
DG(16:1(9Z)/18:0/0:0)	746146	738248	728944	2248679	2477089	2474538	8278030	8272176	8257489	10798029	11047375	10930966	1596979	1651531	1698584	11984453	11770381	11835258	482438	442042	481617	1354651	1412767	1420454	7485055	7666953	7674942	1273638	1074248	1249775	561278	554125	578405	1981370	2017645	2006981	1756876	1907248	1984942	8075808	7273025	7894650	5167782	5240270	5274031	8783686	8823297	8096425	1500441
DG(18:0/16:1(9Z)/0:0)	746146	738248	728944	2248679	2477089	2474538	8278030	8272176	8257489	10798029	11047375	10930966	1596979	1651531	1698584	11984453	11770381	11835258	482438	442042	481617	1354651	1412767	1420454	7485055	7666953	7674942	1273638	1074248	1249775	561278	554125	578405	1981370	2017645	2006981	1756876	1907248	1984942	8075808	7273025	7894650	5167782	5240270	5274031	8783686	8823297	8096425	1500441
DG(16:1(9Z)/18:0/0:0)[iso2]	746146	738248	728944	2248679	2477089	2474538	8278030	8272176	8257489	10798029	11047375	10930966	1596979	1651531	1698584	11984453	11770381	11835258	482438	442042	481617	1354651	1412767	1420454	7485055	7666953	7674942	1273638	1074248	1249775	561278	554125	578405	1981370	2017645	2006981	1756876	1907248	1984942	8075808	7273025	7894650	5167782	5240270	5274031	8783686	8823297	8096425	1500441
DG(20:1(11Z)/14:0/0:0)	746146	738248	728944	2248679	2477089	2474538	8278030	8272176	8257489	10798029	11047375	10930966	1596979	1651531	1698584	11984453	11770381	11835258	482438	442042	481617	1354651	1412767	1420454	7485055	7666953	7674942	1273638	1074248	1249775	561278	554125	578405	1981370	2017645	2006981	1756876	1907248	1984942	8075808	7273025	7894650	5167782	5240270	5274031	8783686	8823297	8096425	1500441
DG(14:1(9Z)/20:0/0:0)	746146	738248	728944	2248679	2477089	2474538	8278030	8272176	8257489	10798029	11047375	10930966	1596979	1651531	1698584	11984453	11770381	11835258	482438	442042	481617	1354651	1412767	1420454	7485055	7666953	7674942	1273638	1074248	1249775	561278	554125	578405	1981370	2017645	2006981	1756876	1907248	1984942	8075808	7273025	7894650	5167782	5240270	5274031	8783686	8823297	8096425	1500441
DG(18:1(9Z)/16:0/0:0)	746146	738248	728944	2248679	2477089	2474538	8278030	8272176	8257489	10798029	11047375	10930966	1596979	1651531	1698584	11984453	11770381	11835258	482438	442042	481617	1354651	1412767	1420454	7485055	7666953	7674942	1273638	1074248	1249775	561278	554125	578405	1981370	2017645	2006981	1756876	1907248	1984942	8075808	7273025	7894650	5167782	5240270	5274031	8783686	8823297	8096425	1500441
DG(14:0/20:1(11Z)/0:0)[iso2]	746146	738248	728944	2248679	2477089	2474538	8278030	8272176	8257489	10798029	11047375	10930966	1596979	1651531	1698584	11984453	11770381	11835258	482438	442042	481617	1354651	1412767	1420454	7485055	7666953	7674942	1273638	1074248	1249775	561278	554125	578405	1981370	2017645	2006981	1756876	1907248	1984942	8075808	7273025	7894650	5167782	5240270	5274031	8783686	8823297	8096425	1500441
DG(18:0/0:0/16:1n7)	746146	738248	728944	2248679	2477089	2474538	8278030	8272176	8257489	10798029	11047375	10930966	1596979	1651531	1698584	11984453	11770381	11835258	482438	442042	481617	1354651	1412767	1420454	7485055	7666953	7674942	1273638	1074248	1249775	561278	554125	578405	1981370	2017645	2006981	1756876	1907248	1984942	8075808	7273025	7894650	5167782	5240270	5274031	8783686	8823297	8096425	1500441
DG(16:0/0:0/18:1n7)	746146	738248	728944	2248679	2477089	2474538	8278030	8272176	8257489	10798029	11047375	10930966	1596979	1651531	1698584	11984453	11770381	11835258	482438	442042	481617	1354651	1412767	1420454	7485055	7666953	7674942	1273638	1074248	1249775	561278	554125	578405	1981370	2017645	2006981	1756876	1907248	1984942	8075808	7273025	7894650	5167782	5240270	5274031	8783686	8823297	8096425	1500441
DG(16:0/0:0/18:1n9)	746146	738248	728944	2248679	2477089	2474538	8278030	8272176	8257489	10798029	11047375	10930966	1596979	1651531	1698584	11984453	11770381	11835258	482438	442042	481617	1354651	1412767	1420454	7485055	7666953	7674942	1273638	1074248	1249775	561278	554125	578405	1981370	2017645	2006981	1756876	1907248	1984942	8075808	7273025	7894650	5167782	5240270	5274031	8783686	8823297	8096425	1500441
DG(14:1(9Z)/20:0/0:0)[iso2]	746146	738248	728944	2248679	2477089	2474538	8278030	8272176	8257489	10798029	11047375	10930966	1596979	1651531	1698584	11984453	11770381	11835258	482438	442042	481617	1354651	1412767	1420454	7485055	7666953	7674942	1273638	1074248	1249775	561278	554125	578405	1981370	2017645	2006981	1756876	1907248	1984942	8075808	7273025	7894650	5167782	5240270	5274031	8783686	8823297	8096425	1500441
DG(20:0/0:0/14:1n5)	746146	738248	728944	2248679	2477089	2474538	8278030	8272176	8257489	10798029	11047375	10930966	1596979	1651531	1698584	11984453	11770381	11835258	482438	442042	481617	1354651	1412767	1420454	7485055	7666953	7674942	1273638	1074248	1249775	561278	554125	578405	1981370	2017645	2006981	1756876	1907248	1984942	8075808	7273025	7894650	5167782	5240270	5274031	8783686	8823297	8096425	1500441
DG(18:3(9Z,12Z,15Z)/18:0/0:0)	1	1	1	1	1	1	316719	322144	318819	540159	577471	562931	1	1	1	553762	525559	547470	1	1	1	1	1	1	380445	392566	382236	1	1	1	1	1	1	1	1	1	1	1	1	348986	280390	327719	118782	122471	119221	380227	394002	321676	1
DG(18:3(6Z,9Z,12Z)/18:0/0:0)	1	1	1	1	1	1	316719	322144	318819	540159	577471	562931	1	1	1	553762	525559	547470	1	1	1	1	1	1	380445	392566	382236	1	1	1	1	1	1	1	1	1	1	1	1	348986	280390	327719	118782	122471	119221	380227	394002	321676	1
DG(18:2(9Z,12Z)/18:1(9Z)/0:0)	1	1	1	1	1	1	316719	322144	318819	540159	577471	562931	1	1	1	553762	525559	547470	1	1	1	1	1	1	380445	392566	382236	1	1	1	1	1	1	1	1	1	1	1	1	348986	280390	327719	118782	122471	119221	380227	394002	321676	1
DG(16:1n7/0:0/20:2n6)	1	1	1	1	1	1	316719	322144	318819	540159	577471	562931	1	1	1	553762	525559	547470	1	1	1	1	1	1	380445	392566	382236	1	1	1	1	1	1	1	1	1	1	1	1	348986	280390	327719	118782	122471	119221	380227	394002	321676	1
DG(16:0/20:3(8Z,11Z,14Z)/0:0)[iso2]	1	1	1	1	1	1	316719	322144	318819	540159	577471	562931	1	1	1	553762	525559	547470	1	1	1	1	1	1	380445	392566	382236	1	1	1	1	1	1	1	1	1	1	1	1	348986	280390	327719	118782	122471	119221	380227	394002	321676	1
DG(18:2(9Z,12Z)/18:1(11Z)/0:0)	1	1	1	1	1	1	316719	322144	318819	540159	577471	562931	1	1	1	553762	525559	547470	1	1	1	1	1	1	380445	392566	382236	1	1	1	1	1	1	1	1	1	1	1	1	348986	280390	327719	118782	122471	119221	380227	394002	321676	1
DG(16:1(9Z)/20:2(11Z,14Z)/0:0)	1	1	1	1	1	1	316719	322144	318819	540159	577471	562931	1	1	1	553762	525559	547470	1	1	1	1	1	1	380445	392566	382236	1	1	1	1	1	1	1	1	1	1	1	1	348986	280390	327719	118782	122471	119221	380227	394002	321676	1
DG(20:3(5Z,8Z,11Z)/16:0/0:0)	1	1	1	1	1	1	316719	322144	318819	540159	577471	562931	1	1	1	553762	525559	547470	1	1	1	1	1	1	380445	392566	382236	1	1	1	1	1	1	1	1	1	1	1	1	348986	280390	327719	118782	122471	119221	380227	394002	321676	1
DG(16:1(9Z)/20:2(11Z,14Z)/0:0)[iso2]	1	1	1	1	1	1	316719	322144	318819	540159	577471	562931	1	1	1	553762	525559	547470	1	1	1	1	1	1	380445	392566	382236	1	1	1	1	1	1	1	1	1	1	1	1	348986	280390	327719	118782	122471	119221	380227	394002	321676	1
DG(16:0/0:0/20:3n6)	1	1	1	1	1	1	316719	322144	318819	540159	577471	562931	1	1	1	553762	525559	547470	1	1	1	1	1	1	380445	392566	382236	1	1	1	1	1	1	1	1	1	1	1	1	348986	280390	327719	118782	122471	119221	380227	394002	321676	1
DG(18:0/18:3(9Z,12Z,15Z)/0:0)[iso2]	1	1	1	1	1	1	316719	322144	318819	540159	577471	562931	1	1	1	553762	525559	547470	1	1	1	1	1	1	380445	392566	382236	1	1	1	1	1	1	1	1	1	1	1	1	348986	280390	327719	118782	122471	119221	380227	394002	321676	1
DG(16:0/0:0/20:3n9)	1	1	1	1	1	1	316719	322144	318819	540159	577471	562931	1	1	1	553762	525559	547470	1	1	1	1	1	1	380445	392566	382236	1	1	1	1	1	1	1	1	1	1	1	1	348986	280390	327719	118782	122471	119221	380227	394002	321676	1
DG(16:0/20:3(5Z,8Z,11Z)/0:0)	1	1	1	1	1	1	316719	322144	318819	540159	577471	562931	1	1	1	553762	525559	547470	1	1	1	1	1	1	380445	392566	382236	1	1	1	1	1	1	1	1	1	1	1	1	348986	280390	327719	118782	122471	119221	380227	394002	321676	1
DG(18:1(9Z)/18:2(9Z,12Z)/0:0)	1	1	1	1	1	1	316719	322144	318819	540159	577471	562931	1	1	1	553762	525559	547470	1	1	1	1	1	1	380445	392566	382236	1	1	1	1	1	1	1	1	1	1	1	1	348986	280390	327719	118782	122471	119221	380227	394002	321676	1
DG(18:1(9Z)/18:2(9Z,12Z)/0:0)[iso2]	1	1	1	1	1	1	316719	322144	318819	540159	577471	562931	1	1	1	553762	525559	547470	1	1	1	1	1	1	380445	392566	382236	1	1	1	1	1	1	1	1	1	1	1	1	348986	280390	327719	118782	122471	119221	380227	394002	321676	1
DG(22:2(13Z,16Z)/14:1(9Z)/0:0)	1	1	1	1	1	1	316719	322144	318819	540159	577471	562931	1	1	1	553762	525559	547470	1	1	1	1	1	1	380445	392566	382236	1	1	1	1	1	1	1	1	1	1	1	1	348986	280390	327719	118782	122471	119221	380227	394002	321676	1
DG(18:0/18:3(6Z,9Z,12Z)/0:0)	1	1	1	1	1	1	316719	322144	318819	540159	577471	562931	1	1	1	553762	525559	547470	1	1	1	1	1	1	380445	392566	382236	1	1	1	1	1	1	1	1	1	1	1	1	348986	280390	327719	118782	122471	119221	380227	394002	321676	1
DG(20:3(8Z,11Z,14Z)/16:0/0:0)	1	1	1	1	1	1	316719	322144	318819	540159	577471	562931	1	1	1	553762	525559	547470	1	1	1	1	1	1	380445	392566	382236	1	1	1	1	1	1	1	1	1	1	1	1	348986	280390	327719	118782	122471	119221	380227	394002	321676	1
DG(18:0/0:0/18:3n3)	1	1	1	1	1	1	316719	322144	318819	540159	577471	562931	1	1	1	553762	525559	547470	1	1	1	1	1	1	380445	392566	382236	1	1	1	1	1	1	1	1	1	1	1	1	348986	280390	327719	118782	122471	119221	380227	394002	321676	1
DG(18:0/0:0/18:3n6)	1	1	1	1	1	1	316719	322144	318819	540159	577471	562931	1	1	1	553762	525559	547470	1	1	1	1	1	1	380445	392566	382236	1	1	1	1	1	1	1	1	1	1	1	1	348986	280390	327719	118782	122471	119221	380227	394002	321676	1
DG(18:1(11Z)/18:2(9Z,12Z)/0:0)	1	1	1	1	1	1	316719	322144	318819	540159	577471	562931	1	1	1	553762	525559	547470	1	1	1	1	1	1	380445	392566	382236	1	1	1	1	1	1	1	1	1	1	1	1	348986	280390	327719	118782	122471	119221	380227	394002	321676	1
DG(18:0/18:3(9Z,12Z,15Z)/0:0)	1	1	1	1	1	1	316719	322144	318819	540159	577471	562931	1	1	1	553762	525559	547470	1	1	1	1	1	1	380445	392566	382236	1	1	1	1	1	1	1	1	1	1	1	1	348986	280390	327719	118782	122471	119221	380227	394002	321676	1
DG(20:2(11Z,14Z)/16:1(9Z)/0:0)	1	1	1	1	1	1	316719	322144	318819	540159	577471	562931	1	1	1	553762	525559	547470	1	1	1	1	1	1	380445	392566	382236	1	1	1	1	1	1	1	1	1	1	1	1	348986	280390	327719	118782	122471	119221	380227	394002	321676	1
DG(14:1n5/0:0/22:2n6)	1	1	1	1	1	1	316719	322144	318819	540159	577471	562931	1	1	1	553762	525559	547470	1	1	1	1	1	1	380445	392566	382236	1	1	1	1	1	1	1	1	1	1	1	1	348986	280390	327719	118782	122471	119221	380227	394002	321676	1
DG(14:1(9Z)/22:2(13Z,16Z)/0:0)	1	1	1	1	1	1	316719	322144	318819	540159	577471	562931	1	1	1	553762	525559	547470	1	1	1	1	1	1	380445	392566	382236	1	1	1	1	1	1	1	1	1	1	1	1	348986	280390	327719	118782	122471	119221	380227	394002	321676	1
DG(16:0/20:3(8Z,11Z,14Z)/0:0)	1	1	1	1	1	1	316719	322144	318819	540159	577471	562931	1	1	1	553762	525559	547470	1	1	1	1	1	1	380445	392566	382236	1	1	1	1	1	1	1	1	1	1	1	1	348986	280390	327719	118782	122471	119221	380227	394002	321676	1
DG(18:3(6Z,9Z,12Z)/18:0/0:0)[iso2]	1	1	1	1	1	1	316719	322144	318819	540159	577471	562931	1	1	1	553762	525559	547470	1	1	1	1	1	1	380445	392566	382236	1	1	1	1	1	1	1	1	1	1	1	1	348986	280390	327719	118782	122471	119221	380227	394002	321676	1
LysoPC(24:1(15Z))	1	1	1	1	1	1	1	1	1	1	1	1	1	1	1	1	1	1	1	1	1	1	1	1	1	1	1	1	1	1	1	1	1	1	1	1	1	1	1	1	1	1	1	1	1	1	1	1	1
LysoPC(24:0)	1	1	1	1	1	1	1	1	1	115886	118642	111064	1	1	1	1	1	1	1	1	1	1	1	1	1	1	1	1	1	1	1	1	1	1	1	1	1	1	1	1	1	1	1	1	1	1	1	1	1
DG(20:3(8Z,11Z,14Z)/15:0/0:0)	1	1	1	1	1	1	1	1	1	1	1	1	1	1	1	1	1	1	1	1	1	1	1	1	1	1	1	1	1	1	1	1	1	1	1	1	1	1	1	1	1	1	1	1	1	1	1	1	1
DG(20:3(5Z,8Z,11Z)/15:0/0:0)	1	1	1	1	1	1	1	1	1	1	1	1	1	1	1	1	1	1	1	1	1	1	1	1	1	1	1	1	1	1	1	1	1	1	1	1	1	1	1	1	1	1	1	1	1	1	1	1	1
DG(15:0/20:3(5Z,8Z,11Z)/0:0)	1	1	1	1	1	1	1	1	1	1	1	1	1	1	1	1	1	1	1	1	1	1	1	1	1	1	1	1	1	1	1	1	1	1	1	1	1	1	1	1	1	1	1	1	1	1	1	1	1
DG(15:0/0:0/20:3n6)	1	1	1	1	1	1	1	1	1	1	1	1	1	1	1	1	1	1	1	1	1	1	1	1	1	1	1	1	1	1	1	1	1	1	1	1	1	1	1	1	1	1	1	1	1	1	1	1	1
DG(15:0/0:0/20:3n9)	1	1	1	1	1	1	1	1	1	1	1	1	1	1	1	1	1	1	1	1	1	1	1	1	1	1	1	1	1	1	1	1	1	1	1	1	1	1	1	1	1	1	1	1	1	1	1	1	1
DG(16:1n7/0:0/18:2n6)	1	1	1	1	1	1	1	1	1	1	1	1	1	1	1	1	1	1	1	1	1	1	1	1	1	1	1	1	1	1	1	1	1	1	1	1	1	1	1	1	1	1	1	1	1	1	1	1	1
DG(15:0/20:3(8Z,11Z,14Z)/0:0)	1	1	1	1	1	1	1	1	1	1	1	1	1	1	1	1	1	1	1	1	1	1	1	1	1	1	1	1	1	1	1	1	1	1	1	1	1	1	1	1	1	1	1	1	1	1	1	1	1
DG(15:0/22:6(4Z,7Z,10Z,13Z,16Z,19Z)/0:0)	706066	693317	672237	1265160	1288958	1259530	2769067	2766009	2817596	3758675	3739093	3726296	1070373	1065460	1091121	3453939	3366420	3455104	432256	379830	432209	873356	881634	905528	2854423	2935422	2877124	931742	931624	960885	569323	552912	579972	1402910	1482359	1440571	1515885	1499176	1537560	3536799	3595507	3516885	2491025	2499267	2508352	3228851	3285593	3435104	1105147
DG(22:6(4Z,7Z,10Z,13Z,16Z,19Z)/15:0/0:0)	706066	693317	672237	1265160	1288958	1259530	2769067	2766009	2817596	3758675	3739093	3726296	1070373	1065460	1091121	3453939	3366420	3455104	432256	379830	432209	873356	881634	905528	2854423	2935422	2877124	931742	931624	960885	569323	552912	579972	1402910	1482359	1440571	1515885	1499176	1537560	3536799	3595507	3516885	2491025	2499267	2508352	3228851	3285593	3435104	1105147
DG(15:0/0:0/22:6n3)	706066	693317	672237	1265160	1288958	1259530	2769067	2766009	2817596	3758675	3739093	3726296	1070373	1065460	1091121	3453939	3366420	3455104	432256	379830	432209	873356	881634	905528	2854423	2935422	2877124	931742	931624	960885	569323	552912	579972	1402910	1482359	1440571	1515885	1499176	1537560	3536799	3595507	3516885	2491025	2499267	2508352	3228851	3285593	3435104	1105147
DG(18:2n6/0:0/18:4n3)	706066	693317	672237	1265160	1288958	1259530	2769067	2766009	2817596	3758675	3739093	3726296	1070373	1065460	1091121	3453939	3366420	3455104	432256	379830	432209	873356	881634	905528	2854423	2935422	2877124	931742	931624	960885	569323	552912	579972	1402910	1482359	1440571	1515885	1499176	1537560	3536799	3595507	3516885	2491025	2499267	2508352	3228851	3285593	3435104	1105147
Ferrocytochrome	1	1	1	1	1	1	1	1	1	1	156513	40673	1	45307	26417	146142	83207	1	1	1	1	1	1	1	1	1	1	1	1	1	1	1	1	1	1	1	1	1	1	1	1	1	1	1	1	1	1	1	1
DG(20:2(11Z,14Z)/15:0/0:0)	1	1	1	1	1	1	1	1	1	1	1	1	1	1	1	1	155715	1	1	1	1	1	1	1	1	1	1	1	1	1	1	1	1	1	1	1	1	1	1	1	1	1	1	1	1	1	1	1	1
DG(15:0/0:0/20:2n6)	1	1	1	1	1	1	1	1	1	1	1	1	1	1	1	1	155715	1	1	1	1	1	1	1	1	1	1	1	1	1	1	1	1	1	1	1	1	1	1	1	1	1	1	1	1	1	1	1	1
DG(16:0/0:0/18:2n6)	1	1	1	1	1	1	1	1	1	1	1	1	1	1	1	1	155715	1	1	1	1	1	1	1	1	1	1	1	1	1	1	1	1	1	1	1	1	1	1	1	1	1	1	1	1	1	1	1	1
DG(15:0/20:2(11Z,14Z)/0:0)	1	1	1	1	1	1	1	1	1	1	1	1	1	1	1	1	155715	1	1	1	1	1	1	1	1	1	1	1	1	1	1	1	1	1	1	1	1	1	1	1	1	1	1	1	1	1	1	1	1
DG(22:5(4Z,7Z,10Z,13Z,16Z)/15:0/0:0)	1562627	1507899	1469724	3326076	3349866	3319981	3854771	3879422	3935559	4478795	4628754	4483676	2379658	2322916	2388628	4974721	4935334	5053753	1475394	1408182	1500621	2732640	2706748	2751111	3719588	3787441	1	2474228	2489671	2510081	1588083	1601724	1613040	2917340	2973405	2986240	3151417	3105732	3142060	4713131	4680539	4637534	3882323	3849462	3950655	3309322	3376030	3508420	2481952
DG(15:0/0:0/22:5n6)	1562627	1507899	1469724	3326076	3349866	3319981	3854771	3879422	3935559	4478795	4628754	4483676	2379658	2322916	2388628	4974721	4935334	5053753	1475394	1408182	1500621	2732640	2706748	2751111	3719588	3787441	1	2474228	2489671	2510081	1588083	1601724	1613040	2917340	2973405	2986240	3151417	3105732	3142060	4713131	4680539	4637534	3882323	3849462	3950655	3309322	3376030	3508420	2481952
DG(15:0/0:0/22:5n3)	1562627	1507899	1469724	3326076	3349866	3319981	3854771	3879422	3935559	4478795	4628754	4483676	2379658	2322916	2388628	4974721	4935334	5053753	1475394	1408182	1500621	2732640	2706748	2751111	3719588	3787441	1	2474228	2489671	2510081	1588083	1601724	1613040	2917340	2973405	2986240	3151417	3105732	3142060	4713131	4680539	4637534	3882323	3849462	3950655	3309322	3376030	3508420	2481952
DG(15:0/22:5(7Z,10Z,13Z,16Z,19Z)/0:0)	1562627	1507899	1469724	3326076	3349866	3319981	3854771	3879422	3935559	4478795	4628754	4483676	2379658	2322916	2388628	4974721	4935334	5053753	1475394	1408182	1500621	2732640	2706748	2751111	3719588	3787441	1	2474228	2489671	2510081	1588083	1601724	1613040	2917340	2973405	2986240	3151417	3105732	3142060	4713131	4680539	4637534	3882323	3849462	3950655	3309322	3376030	3508420	2481952
DG(22:5(7Z,10Z,13Z,16Z,19Z)/15:0/0:0)	1562627	1507899	1469724	3326076	3349866	3319981	3854771	3879422	3935559	4478795	4628754	4483676	2379658	2322916	2388628	4974721	4935334	5053753	1475394	1408182	1500621	2732640	2706748	2751111	3719588	3787441	1	2474228	2489671	2510081	1588083	1601724	1613040	2917340	2973405	2986240	3151417	3105732	3142060	4713131	4680539	4637534	3882323	3849462	3950655	3309322	3376030	3508420	2481952
DG(18:2n6/0:0/18:3n6)	1562627	1507899	1469724	3326076	3349866	3319981	3854771	3879422	3935559	4478795	4628754	4483676	2379658	2322916	2388628	4974721	4935334	5053753	1475394	1408182	1500621	2732640	2706748	2751111	3719588	3787441	1	2474228	2489671	2510081	1588083	1601724	1613040	2917340	2973405	2986240	3151417	3105732	3142060	4713131	4680539	4637534	3882323	3849462	3950655	3309322	3376030	3508420	2481952
DG(15:0/22:5(4Z,7Z,10Z,13Z,16Z)/0:0)	1562627	1507899	1469724	3326076	3349866	3319981	3854771	3879422	3935559	4478795	4628754	4483676	2379658	2322916	2388628	4974721	4935334	5053753	1475394	1408182	1500621	2732640	2706748	2751111	3719588	3787441	1	2474228	2489671	2510081	1588083	1601724	1613040	2917340	2973405	2986240	3151417	3105732	3142060	4713131	4680539	4637534	3882323	3849462	3950655	3309322	3376030	3508420	2481952
DG(18:2n6/0:0/18:3n3)	1562627	1507899	1469724	3326076	3349866	3319981	3854771	3879422	3935559	4478795	4628754	4483676	2379658	2322916	2388628	4974721	4935334	5053753	1475394	1408182	1500621	2732640	2706748	2751111	3719588	3787441	1	2474228	2489671	2510081	1588083	1601724	1613040	2917340	2973405	2986240	3151417	3105732	3142060	4713131	4680539	4637534	3882323	3849462	3950655	3309322	3376030	3508420	2481952
DG(20:1(11Z)/15:0/0:0)	1	1	1	1	1	1	633268	625983	642435	1094732	1137444	1114945	1	1	1	1133928	1096447	1133610	1	1	1	1	1	1	636485	669108	661743	1	1	1	1	1	1	1	1	1	171193	188666	194063	812796	695379	783338	422822	434050	434339	677455	690193	620646	1
DG(15:0/0:0/20:1n9)	1	1	1	1	1	1	633268	625983	642435	1094732	1137444	1114945	1	1	1	1133928	1096447	1133610	1	1	1	1	1	1	636485	669108	661743	1	1	1	1	1	1	1	1	1	171193	188666	194063	812796	695379	783338	422822	434050	434339	677455	690193	620646	1
DG(15:0/20:1(11Z)/0:0)	1	1	1	1	1	1	633268	625983	642435	1094732	1137444	1114945	1	1	1	1133928	1096447	1133610	1	1	1	1	1	1	636485	669108	661743	1	1	1	1	1	1	1	1	1	171193	188666	194063	812796	695379	783338	422822	434050	434339	677455	690193	620646	1
DG(22:4(7Z,10Z,13Z,16Z)/15:0/0:0)	1	1	1	1	1	1	537392	574110	636543	996172	609269	771491	1	1	1	90871	912860	1040457	1	1	1	1	1	1	636485	663397	661743	1	1	1	1	1	1	1	1	1	171030	188666	194063	805200	695379	801919	422822	443539	434339	671719	669265	620646	1
DG(15:0/0:0/22:4n6)	1	1	1	1	1	1	537392	574110	636543	996172	609269	771491	1	1	1	90871	912860	1040457	1	1	1	1	1	1	636485	663397	661743	1	1	1	1	1	1	1	1	1	171030	188666	194063	805200	695379	801919	422822	443539	434339	671719	669265	620646	1
DG(15:0/22:4(7Z,10Z,13Z,16Z)/0:0)	1	1	1	1	1	1	537392	574110	636543	996172	609269	771491	1	1	1	90871	912860	1040457	1	1	1	1	1	1	636485	663397	661743	1	1	1	1	1	1	1	1	1	171030	188666	194063	805200	695379	801919	422822	443539	434339	671719	669265	620646	1
DG(22:6(4Z,7Z,10Z,13Z,16Z,19Z)/14:1(9Z)/0:0)	1	1	1	1	1	1	1	1	1	1	1	1	1	1	1	1	1	1	1	1	1	1	1	1	1	1	1	1	1	1	1	1	1	1	1	1	1	1	1	1	1	1	1	1	1	1	1	1	1
DG(18:3(6Z,9Z,12Z)/18:4(6Z,9Z,12Z,15Z)/0:0)	1	1	1	1	1	1	1	1	1	1	1	1	1	1	1	1	1	1	1	1	1	1	1	1	1	1	1	1	1	1	1	1	1	1	1	1	1	1	1	1	1	1	1	1	1	1	1	1	1
DG(18:3n6/0:0/18:4n3)	1	1	1	1	1	1	1	1	1	1	1	1	1	1	1	1	1	1	1	1	1	1	1	1	1	1	1	1	1	1	1	1	1	1	1	1	1	1	1	1	1	1	1	1	1	1	1	1	1
DG(18:4(6Z,9Z,12Z,15Z)/18:3(9Z,12Z,15Z)/0:0)	1	1	1	1	1	1	1	1	1	1	1	1	1	1	1	1	1	1	1	1	1	1	1	1	1	1	1	1	1	1	1	1	1	1	1	1	1	1	1	1	1	1	1	1	1	1	1	1	1
DG(14:1(9Z)/22:6(4Z,7Z,10Z,13Z,16Z,19Z)/0:0)	1	1	1	1	1	1	1	1	1	1	1	1	1	1	1	1	1	1	1	1	1	1	1	1	1	1	1	1	1	1	1	1	1	1	1	1	1	1	1	1	1	1	1	1	1	1	1	1	1
DG(18:3(9Z,12Z,15Z)/18:4(6Z,9Z,12Z,15Z)/0:0)	1	1	1	1	1	1	1	1	1	1	1	1	1	1	1	1	1	1	1	1	1	1	1	1	1	1	1	1	1	1	1	1	1	1	1	1	1	1	1	1	1	1	1	1	1	1	1	1	1
DG(14:1n5/0:0/22:6n3)	1	1	1	1	1	1	1	1	1	1	1	1	1	1	1	1	1	1	1	1	1	1	1	1	1	1	1	1	1	1	1	1	1	1	1	1	1	1	1	1	1	1	1	1	1	1	1	1	1
DG(18:4(6Z,9Z,12Z,15Z)/18:3(6Z,9Z,12Z)/0:0)	1	1	1	1	1	1	1	1	1	1	1	1	1	1	1	1	1	1	1	1	1	1	1	1	1	1	1	1	1	1	1	1	1	1	1	1	1	1	1	1	1	1	1	1	1	1	1	1	1
Neuromedin N	1	1	1	1	1	1	1	1	1	1	1	1	1	1	1	1	1	1	1	1	1	1	1	1	1	1	1	1	1	1	1	1	1	1	1	1	1	1	1	1	1	1	1	1	1	1	1	1	1
CerP(d18:1/16:0)	1	1	1	1	1	1	1	1	1	52801	56483	38997	1	1	1	57461	49918	39530	1	1	1	1	1	1	1	1	1	1	1	1	1	1	1	1	1	1	1	1	1	37006	36635	36902	1	1	1	1	1	1	1
DG(18:1n9/0:0/18:4n3)	1	1	141956	327885	368007	363398	1925381	1925354	1948998	3340580	3342680	3395756	260965	259345	280470	3301454	3381441	3455484	1	1	1	211322	222940	213387	2181044	2254038	2240704	250811	199489	245911	1	1	1	424353	428774	437370	338245	371059	396670	2367391	2007935	2284418	1162092	1154544	1174323	2536028	2550512	2222483	324366
DG(18:1(11Z)/18:4(6Z,9Z,12Z,15Z)/0:0)	1	1	141956	327885	368007	363398	1925381	1925354	1948998	3340580	3342680	3395756	260965	259345	280470	3301454	3381441	3455484	1	1	1	211322	222940	213387	2181044	2254038	2240704	250811	199489	245911	1	1	1	424353	428774	437370	338245	371059	396670	2367391	2007935	2284418	1162092	1154544	1174323	2536028	2550512	2222483	324366
DG(14:0/22:5(7Z,10Z,13Z,16Z,19Z)/0:0)	1	1	141956	327885	368007	363398	1925381	1925354	1948998	3340580	3342680	3395756	260965	259345	280470	3301454	3381441	3455484	1	1	1	211322	222940	213387	2181044	2254038	2240704	250811	199489	245911	1	1	1	424353	428774	437370	338245	371059	396670	2367391	2007935	2284418	1162092	1154544	1174323	2536028	2550512	2222483	324366
DG(18:4(6Z,9Z,12Z,15Z)/18:1(9Z)/0:0)	1	1	141956	327885	368007	363398	1925381	1925354	1948998	3340580	3342680	3395756	260965	259345	280470	3301454	3381441	3455484	1	1	1	211322	222940	213387	2181044	2254038	2240704	250811	199489	245911	1	1	1	424353	428774	437370	338245	371059	396670	2367391	2007935	2284418	1162092	1154544	1174323	2536028	2550512	2222483	324366
DG(16:1(9Z)/20:4(8Z,11Z,14Z,17Z)/0:0)	1	1	141956	327885	368007	363398	1925381	1925354	1948998	3340580	3342680	3395756	260965	259345	280470	3301454	3381441	3455484	1	1	1	211322	222940	213387	2181044	2254038	2240704	250811	199489	245911	1	1	1	424353	428774	437370	338245	371059	396670	2367391	2007935	2284418	1162092	1154544	1174323	2536028	2550512	2222483	324366
DG(14:1(9Z)/22:4(7Z,10Z,13Z,16Z)/0:0)	1	1	141956	327885	368007	363398	1925381	1925354	1948998	3340580	3342680	3395756	260965	259345	280470	3301454	3381441	3455484	1	1	1	211322	222940	213387	2181044	2254038	2240704	250811	199489	245911	1	1	1	424353	428774	437370	338245	371059	396670	2367391	2007935	2284418	1162092	1154544	1174323	2536028	2550512	2222483	324366
DG(20:4(5Z,8Z,11Z,14Z)/16:1(9Z)/0:0)	1	1	141956	327885	368007	363398	1925381	1925354	1948998	3340580	3342680	3395756	260965	259345	280470	3301454	3381441	3455484	1	1	1	211322	222940	213387	2181044	2254038	2240704	250811	199489	245911	1	1	1	424353	428774	437370	338245	371059	396670	2367391	2007935	2284418	1162092	1154544	1174323	2536028	2550512	2222483	324366
DG(18:4(6Z,9Z,12Z,15Z)/18:1(11Z)/0:0)	1	1	141956	327885	368007	363398	1925381	1925354	1948998	3340580	3342680	3395756	260965	259345	280470	3301454	3381441	3455484	1	1	1	211322	222940	213387	2181044	2254038	2240704	250811	199489	245911	1	1	1	424353	428774	437370	338245	371059	396670	2367391	2007935	2284418	1162092	1154544	1174323	2536028	2550512	2222483	324366
DG(22:4(7Z,10Z,13Z,16Z)/14:1(9Z)/0:0)	1	1	141956	327885	368007	363398	1925381	1925354	1948998	3340580	3342680	3395756	260965	259345	280470	3301454	3381441	3455484	1	1	1	211322	222940	213387	2181044	2254038	2240704	250811	199489	245911	1	1	1	424353	428774	437370	338245	371059	396670	2367391	2007935	2284418	1162092	1154544	1174323	2536028	2550512	2222483	324366
DG(18:3(9Z,12Z,15Z)/18:2(9Z,12Z)/0:0)	1	1	141956	327885	368007	363398	1925381	1925354	1948998	3340580	3342680	3395756	260965	259345	280470	3301454	3381441	3455484	1	1	1	211322	222940	213387	2181044	2254038	2240704	250811	199489	245911	1	1	1	424353	428774	437370	338245	371059	396670	2367391	2007935	2284418	1162092	1154544	1174323	2536028	2550512	2222483	324366
DG(20:5(5Z,8Z,11Z,14Z,17Z)/16:0/0:0)	1	1	141956	327885	368007	363398	1925381	1925354	1948998	3340580	3342680	3395756	260965	259345	280470	3301454	3381441	3455484	1	1	1	211322	222940	213387	2181044	2254038	2240704	250811	199489	245911	1	1	1	424353	428774	437370	338245	371059	396670	2367391	2007935	2284418	1162092	1154544	1174323	2536028	2550512	2222483	324366
DG(18:2(9Z,12Z)/18:3(6Z,9Z,12Z)/0:0)	1	1	141956	327885	368007	363398	1925381	1925354	1948998	3340580	3342680	3395756	260965	259345	280470	3301454	3381441	3455484	1	1	1	211322	222940	213387	2181044	2254038	2240704	250811	199489	245911	1	1	1	424353	428774	437370	338245	371059	396670	2367391	2007935	2284418	1162092	1154544	1174323	2536028	2550512	2222483	324366
DG(14:1n5/0:0/22:4n6)	1	1	141956	327885	368007	363398	1925381	1925354	1948998	3340580	3342680	3395756	260965	259345	280470	3301454	3381441	3455484	1	1	1	211322	222940	213387	2181044	2254038	2240704	250811	199489	245911	1	1	1	424353	428774	437370	338245	371059	396670	2367391	2007935	2284418	1162092	1154544	1174323	2536028	2550512	2222483	324366
DG(14:0/22:5(4Z,7Z,10Z,13Z,16Z)/0:0)	1	1	141956	327885	368007	363398	1925381	1925354	1948998	3340580	3342680	3395756	260965	259345	280470	3301454	3381441	3455484	1	1	1	211322	222940	213387	2181044	2254038	2240704	250811	199489	245911	1	1	1	424353	428774	437370	338245	371059	396670	2367391	2007935	2284418	1162092	1154544	1174323	2536028	2550512	2222483	324366
DG(16:0/20:5(5Z,8Z,11Z,14Z,17Z)/0:0)	1	1	141956	327885	368007	363398	1925381	1925354	1948998	3340580	3342680	3395756	260965	259345	280470	3301454	3381441	3455484	1	1	1	211322	222940	213387	2181044	2254038	2240704	250811	199489	245911	1	1	1	424353	428774	437370	338245	371059	396670	2367391	2007935	2284418	1162092	1154544	1174323	2536028	2550512	2222483	324366
DG(14:0/0:0/22:5n6)	1	1	141956	327885	368007	363398	1925381	1925354	1948998	3340580	3342680	3395756	260965	259345	280470	3301454	3381441	3455484	1	1	1	211322	222940	213387	2181044	2254038	2240704	250811	199489	245911	1	1	1	424353	428774	437370	338245	371059	396670	2367391	2007935	2284418	1162092	1154544	1174323	2536028	2550512	2222483	324366
DG(16:1(9Z)/20:4(5Z,8Z,11Z,14Z)/0:0)	1	1	141956	327885	368007	363398	1925381	1925354	1948998	3340580	3342680	3395756	260965	259345	280470	3301454	3381441	3455484	1	1	1	211322	222940	213387	2181044	2254038	2240704	250811	199489	245911	1	1	1	424353	428774	437370	338245	371059	396670	2367391	2007935	2284418	1162092	1154544	1174323	2536028	2550512	2222483	324366
DG(18:3(6Z,9Z,12Z)/18:2(9Z,12Z)/0:0)	1	1	141956	327885	368007	363398	1925381	1925354	1948998	3340580	3342680	3395756	260965	259345	280470	3301454	3381441	3455484	1	1	1	211322	222940	213387	2181044	2254038	2240704	250811	199489	245911	1	1	1	424353	428774	437370	338245	371059	396670	2367391	2007935	2284418	1162092	1154544	1174323	2536028	2550512	2222483	324366
DG(18:1(9Z)/18:4(6Z,9Z,12Z,15Z)/0:0)	1	1	141956	327885	368007	363398	1925381	1925354	1948998	3340580	3342680	3395756	260965	259345	280470	3301454	3381441	3455484	1	1	1	211322	222940	213387	2181044	2254038	2240704	250811	199489	245911	1	1	1	424353	428774	437370	338245	371059	396670	2367391	2007935	2284418	1162092	1154544	1174323	2536028	2550512	2222483	324366
DG(14:0/0:0/22:5n3)	1	1	141956	327885	368007	363398	1925381	1925354	1948998	3340580	3342680	3395756	260965	259345	280470	3301454	3381441	3455484	1	1	1	211322	222940	213387	2181044	2254038	2240704	250811	199489	245911	1	1	1	424353	428774	437370	338245	371059	396670	2367391	2007935	2284418	1162092	1154544	1174323	2536028	2550512	2222483	324366
DG(22:5(4Z,7Z,10Z,13Z,16Z)/14:0/0:0)	1	1	141956	327885	368007	363398	1925381	1925354	1948998	3340580	3342680	3395756	260965	259345	280470	3301454	3381441	3455484	1	1	1	211322	222940	213387	2181044	2254038	2240704	250811	199489	245911	1	1	1	424353	428774	437370	338245	371059	396670	2367391	2007935	2284418	1162092	1154544	1174323	2536028	2550512	2222483	324366
DG(16:1n7/0:0/20:4n3)	1	1	141956	327885	368007	363398	1925381	1925354	1948998	3340580	3342680	3395756	260965	259345	280470	3301454	3381441	3455484	1	1	1	211322	222940	213387	2181044	2254038	2240704	250811	199489	245911	1	1	1	424353	428774	437370	338245	371059	396670	2367391	2007935	2284418	1162092	1154544	1174323	2536028	2550512	2222483	324366
DG(16:1n7/0:0/20:4n6)	1	1	141956	327885	368007	363398	1925381	1925354	1948998	3340580	3342680	3395756	260965	259345	280470	3301454	3381441	3455484	1	1	1	211322	222940	213387	2181044	2254038	2240704	250811	199489	245911	1	1	1	424353	428774	437370	338245	371059	396670	2367391	2007935	2284418	1162092	1154544	1174323	2536028	2550512	2222483	324366
DG(18:2(9Z,12Z)/18:3(9Z,12Z,15Z)/0:0)	1	1	141956	327885	368007	363398	1925381	1925354	1948998	3340580	3342680	3395756	260965	259345	280470	3301454	3381441	3455484	1	1	1	211322	222940	213387	2181044	2254038	2240704	250811	199489	245911	1	1	1	424353	428774	437370	338245	371059	396670	2367391	2007935	2284418	1162092	1154544	1174323	2536028	2550512	2222483	324366
DG(20:4(8Z,11Z,14Z,17Z)/16:1(9Z)/0:0)	1	1	141956	327885	368007	363398	1925381	1925354	1948998	3340580	3342680	3395756	260965	259345	280470	3301454	3381441	3455484	1	1	1	211322	222940	213387	2181044	2254038	2240704	250811	199489	245911	1	1	1	424353	428774	437370	338245	371059	396670	2367391	2007935	2284418	1162092	1154544	1174323	2536028	2550512	2222483	324366
DG(18:1n7/0:0/18:4n3)	1	1	141956	327885	368007	363398	1925381	1925354	1948998	3340580	3342680	3395756	260965	259345	280470	3301454	3381441	3455484	1	1	1	211322	222940	213387	2181044	2254038	2240704	250811	199489	245911	1	1	1	424353	428774	437370	338245	371059	396670	2367391	2007935	2284418	1162092	1154544	1174323	2536028	2550512	2222483	324366
DG(16:0/0:0/20:5n3)	1	1	141956	327885	368007	363398	1925381	1925354	1948998	3340580	3342680	3395756	260965	259345	280470	3301454	3381441	3455484	1	1	1	211322	222940	213387	2181044	2254038	2240704	250811	199489	245911	1	1	1	424353	428774	437370	338245	371059	396670	2367391	2007935	2284418	1162092	1154544	1174323	2536028	2550512	2222483	324366
DG(22:5(7Z,10Z,13Z,16Z,19Z)/14:0/0:0)	1	1	141956	327885	368007	363398	1925381	1925354	1948998	3340580	3342680	3395756	260965	259345	280470	3301454	3381441	3455484	1	1	1	211322	222940	213387	2181044	2254038	2240704	250811	199489	245911	1	1	1	424353	428774	437370	338245	371059	396670	2367391	2007935	2284418	1162092	1154544	1174323	2536028	2550512	2222483	324366
DG(18:3(9Z,12Z,15Z)/20:5(5Z,8Z,11Z,14Z,17Z)/0:0)	1	1	1	1	1	1	358052	352460	360525	481123	490561	468300	1	1	1	472287	447278	467652	1	1	1	1	1	1	334787	360253	353536	1	1	1	1	1	1	1	1	1	211162	205885	208266	446576	441609	445872	340608	334458	350323	336519	355604	377273	1
DG(18:3n3/0:0/20:5n3)	1	1	1	1	1	1	358052	352460	360525	481123	490561	468300	1	1	1	472287	447278	467652	1	1	1	1	1	1	334787	360253	353536	1	1	1	1	1	1	1	1	1	211162	205885	208266	446576	441609	445872	340608	334458	350323	336519	355604	377273	1
DG(20:4(8Z,11Z,14Z,17Z)/18:4(6Z,9Z,12Z,15Z)/0:0)	1	1	1	1	1	1	358052	352460	360525	481123	490561	468300	1	1	1	472287	447278	467652	1	1	1	1	1	1	334787	360253	353536	1	1	1	1	1	1	1	1	1	211162	205885	208266	446576	441609	445872	340608	334458	350323	336519	355604	377273	1
DG(20:4(5Z,8Z,11Z,14Z)/18:4(6Z,9Z,12Z,15Z)/0:0)	1	1	1	1	1	1	358052	352460	360525	481123	490561	468300	1	1	1	472287	447278	467652	1	1	1	1	1	1	334787	360253	353536	1	1	1	1	1	1	1	1	1	211162	205885	208266	446576	441609	445872	340608	334458	350323	336519	355604	377273	1
DG(18:3(6Z,9Z,12Z)/20:5(5Z,8Z,11Z,14Z,17Z)/0:0)	1	1	1	1	1	1	358052	352460	360525	481123	490561	468300	1	1	1	472287	447278	467652	1	1	1	1	1	1	334787	360253	353536	1	1	1	1	1	1	1	1	1	211162	205885	208266	446576	441609	445872	340608	334458	350323	336519	355604	377273	1
DG(20:4n6/0:0/18:4n3)	1	1	1	1	1	1	358052	352460	360525	481123	490561	468300	1	1	1	472287	447278	467652	1	1	1	1	1	1	334787	360253	353536	1	1	1	1	1	1	1	1	1	211162	205885	208266	446576	441609	445872	340608	334458	350323	336519	355604	377273	1
DG(18:3n6/0:0/20:5n3)	1	1	1	1	1	1	358052	352460	360525	481123	490561	468300	1	1	1	472287	447278	467652	1	1	1	1	1	1	334787	360253	353536	1	1	1	1	1	1	1	1	1	211162	205885	208266	446576	441609	445872	340608	334458	350323	336519	355604	377273	1
DG(18:4(6Z,9Z,12Z,15Z)/20:4(8Z,11Z,14Z,17Z)/0:0)	1	1	1	1	1	1	358052	352460	360525	481123	490561	468300	1	1	1	472287	447278	467652	1	1	1	1	1	1	334787	360253	353536	1	1	1	1	1	1	1	1	1	211162	205885	208266	446576	441609	445872	340608	334458	350323	336519	355604	377273	1
DG(18:4(6Z,9Z,12Z,15Z)/20:4(5Z,8Z,11Z,14Z)/0:0)	1	1	1	1	1	1	358052	352460	360525	481123	490561	468300	1	1	1	472287	447278	467652	1	1	1	1	1	1	334787	360253	353536	1	1	1	1	1	1	1	1	1	211162	205885	208266	446576	441609	445872	340608	334458	350323	336519	355604	377273	1
DG(20:5(5Z,8Z,11Z,14Z,17Z)/18:3(6Z,9Z,12Z)/0:0)	1	1	1	1	1	1	358052	352460	360525	481123	490561	468300	1	1	1	472287	447278	467652	1	1	1	1	1	1	334787	360253	353536	1	1	1	1	1	1	1	1	1	211162	205885	208266	446576	441609	445872	340608	334458	350323	336519	355604	377273	1
DG(20:5(5Z,8Z,11Z,14Z,17Z)/18:3(9Z,12Z,15Z)/0:0)	1	1	1	1	1	1	358052	352460	360525	481123	490561	468300	1	1	1	472287	447278	467652	1	1	1	1	1	1	334787	360253	353536	1	1	1	1	1	1	1	1	1	211162	205885	208266	446576	441609	445872	340608	334458	350323	336519	355604	377273	1
DG(18:4n3/0:0/20:4n3)	1	1	1	1	1	1	358052	352460	360525	481123	490561	468300	1	1	1	472287	447278	467652	1	1	1	1	1	1	334787	360253	353536	1	1	1	1	1	1	1	1	1	211162	205885	208266	446576	441609	445872	340608	334458	350323	336519	355604	377273	1
L-Urobilinogen	1	1	1	1	1	1	1	1	1	1	1	1	1	1	1	1	1	1	1	1	1	1	1	1	1	1	1	1	1	1	1	1	1	1	1	1	1	1	1	1	1	1	1	1	1	43474	51499	42226	1
DG(18:2(9Z,12Z)/20:5(5Z,8Z,11Z,14Z,17Z)/0:0)	1	1	1	1	1	1	1	1	1	90681	49288	61023	1	1	1	1	1	1	1	1	1	1	1	1	1	1	1	1	1	1	1	1	1	1	1	1	1	1	1	1	1	1	1	1	1	1	1	1	1
DG(20:4(8Z,11Z,14Z,17Z)/18:3(9Z,12Z,15Z)/0:0)	1	1	1	1	1	1	1	1	1	90681	49288	61023	1	1	1	1	1	1	1	1	1	1	1	1	1	1	1	1	1	1	1	1	1	1	1	1	1	1	1	1	1	1	1	1	1	1	1	1	1
DG(20:4(5Z,8Z,11Z,14Z)/18:3(9Z,12Z,15Z)/0:0)	1	1	1	1	1	1	1	1	1	90681	49288	61023	1	1	1	1	1	1	1	1	1	1	1	1	1	1	1	1	1	1	1	1	1	1	1	1	1	1	1	1	1	1	1	1	1	1	1	1	1
DG(18:3(6Z,9Z,12Z)/20:4(8Z,11Z,14Z,17Z)/0:0)	1	1	1	1	1	1	1	1	1	90681	49288	61023	1	1	1	1	1	1	1	1	1	1	1	1	1	1	1	1	1	1	1	1	1	1	1	1	1	1	1	1	1	1	1	1	1	1	1	1	1
DG(20:4(5Z,8Z,11Z,14Z)/18:3(6Z,9Z,12Z)/0:0)	1	1	1	1	1	1	1	1	1	90681	49288	61023	1	1	1	1	1	1	1	1	1	1	1	1	1	1	1	1	1	1	1	1	1	1	1	1	1	1	1	1	1	1	1	1	1	1	1	1	1
DG(16:1(9Z)/22:6(4Z,7Z,10Z,13Z,16Z,19Z)/0:0)	1	1	1	1	1	1	1	1	1	90681	49288	61023	1	1	1	1	1	1	1	1	1	1	1	1	1	1	1	1	1	1	1	1	1	1	1	1	1	1	1	1	1	1	1	1	1	1	1	1	1
DG(20:4(8Z,11Z,14Z,17Z)/18:3(6Z,9Z,12Z)/0:0)	1	1	1	1	1	1	1	1	1	90681	49288	61023	1	1	1	1	1	1	1	1	1	1	1	1	1	1	1	1	1	1	1	1	1	1	1	1	1	1	1	1	1	1	1	1	1	1	1	1	1
DG(20:3n9/0:0/18:4n3)	1	1	1	1	1	1	1	1	1	90681	49288	61023	1	1	1	1	1	1	1	1	1	1	1	1	1	1	1	1	1	1	1	1	1	1	1	1	1	1	1	1	1	1	1	1	1	1	1	1	1
DG(18:3(6Z,9Z,12Z)/20:4(5Z,8Z,11Z,14Z)/0:0)	1	1	1	1	1	1	1	1	1	90681	49288	61023	1	1	1	1	1	1	1	1	1	1	1	1	1	1	1	1	1	1	1	1	1	1	1	1	1	1	1	1	1	1	1	1	1	1	1	1	1
DG(18:3(9Z,12Z,15Z)/20:4(5Z,8Z,11Z,14Z)/0:0)	1	1	1	1	1	1	1	1	1	90681	49288	61023	1	1	1	1	1	1	1	1	1	1	1	1	1	1	1	1	1	1	1	1	1	1	1	1	1	1	1	1	1	1	1	1	1	1	1	1	1
DG(20:4n6/0:0/18:3n3)	1	1	1	1	1	1	1	1	1	90681	49288	61023	1	1	1	1	1	1	1	1	1	1	1	1	1	1	1	1	1	1	1	1	1	1	1	1	1	1	1	1	1	1	1	1	1	1	1	1	1
DG(20:3n6/0:0/18:4n3)	1	1	1	1	1	1	1	1	1	90681	49288	61023	1	1	1	1	1	1	1	1	1	1	1	1	1	1	1	1	1	1	1	1	1	1	1	1	1	1	1	1	1	1	1	1	1	1	1	1	1
DG(20:5(5Z,8Z,11Z,14Z,17Z)/18:2(9Z,12Z)/0:0)	1	1	1	1	1	1	1	1	1	90681	49288	61023	1	1	1	1	1	1	1	1	1	1	1	1	1	1	1	1	1	1	1	1	1	1	1	1	1	1	1	1	1	1	1	1	1	1	1	1	1
DG(18:3n6/0:0/20:4n3)	1	1	1	1	1	1	1	1	1	90681	49288	61023	1	1	1	1	1	1	1	1	1	1	1	1	1	1	1	1	1	1	1	1	1	1	1	1	1	1	1	1	1	1	1	1	1	1	1	1	1
DG(18:3n6/0:0/20:4n6)	1	1	1	1	1	1	1	1	1	90681	49288	61023	1	1	1	1	1	1	1	1	1	1	1	1	1	1	1	1	1	1	1	1	1	1	1	1	1	1	1	1	1	1	1	1	1	1	1	1	1
DG(16:1n7/0:0/22:6n3)	1	1	1	1	1	1	1	1	1	90681	49288	61023	1	1	1	1	1	1	1	1	1	1	1	1	1	1	1	1	1	1	1	1	1	1	1	1	1	1	1	1	1	1	1	1	1	1	1	1	1
DG(18:4(6Z,9Z,12Z,15Z)/20:3(5Z,8Z,11Z)/0:0)	1	1	1	1	1	1	1	1	1	90681	49288	61023	1	1	1	1	1	1	1	1	1	1	1	1	1	1	1	1	1	1	1	1	1	1	1	1	1	1	1	1	1	1	1	1	1	1	1	1	1
DG(18:3(9Z,12Z,15Z)/20:4(8Z,11Z,14Z,17Z)/0:0)	1	1	1	1	1	1	1	1	1	90681	49288	61023	1	1	1	1	1	1	1	1	1	1	1	1	1	1	1	1	1	1	1	1	1	1	1	1	1	1	1	1	1	1	1	1	1	1	1	1	1
DG(18:4(6Z,9Z,12Z,15Z)/20:3(8Z,11Z,14Z)/0:0)	1	1	1	1	1	1	1	1	1	90681	49288	61023	1	1	1	1	1	1	1	1	1	1	1	1	1	1	1	1	1	1	1	1	1	1	1	1	1	1	1	1	1	1	1	1	1	1	1	1	1
DG(22:6(4Z,7Z,10Z,13Z,16Z,19Z)/16:1(9Z)/0:0)	1	1	1	1	1	1	1	1	1	90681	49288	61023	1	1	1	1	1	1	1	1	1	1	1	1	1	1	1	1	1	1	1	1	1	1	1	1	1	1	1	1	1	1	1	1	1	1	1	1	1
DG(20:3(5Z,8Z,11Z)/18:4(6Z,9Z,12Z,15Z)/0:0)	1	1	1	1	1	1	1	1	1	90681	49288	61023	1	1	1	1	1	1	1	1	1	1	1	1	1	1	1	1	1	1	1	1	1	1	1	1	1	1	1	1	1	1	1	1	1	1	1	1	1
DG(20:3(8Z,11Z,14Z)/18:4(6Z,9Z,12Z,15Z)/0:0)	1	1	1	1	1	1	1	1	1	90681	49288	61023	1	1	1	1	1	1	1	1	1	1	1	1	1	1	1	1	1	1	1	1	1	1	1	1	1	1	1	1	1	1	1	1	1	1	1	1	1
DG(20:3n6/0:0/18:3n3)	1	1	1	1	1	1	274195	230510	318819	460787	1	439027	1	1	1	29748	356450	487822	1	1	1	1	1	1	380445	392566	369626	1	1	1	1	1	1	24833	1	41000	82047	77984	78725	231160	239519	321630	118782	122471	119221	373986	348969	305708	1
DG(20:3(5Z,8Z,11Z)/18:3(6Z,9Z,12Z)/0:0)	1	1	1	1	1	1	1	1	1	460787	1	439027	1	1	1	29748	356450	487822	1	1	1	1	1	1	380445	392566	369626	1	1	1	1	1	1	24833	1	41000	82047	77984	78725	1	1	1	118782	122471	119221	373986	348969	305708	1
DG(18:1n7/0:0/20:5n3)	1	1	1	1	1	1	1	1	1	460787	1	439027	1	1	1	29748	356450	487822	1	1	1	1	1	1	380445	392566	369626	1	1	1	1	1	1	24833	1	41000	82047	77984	78725	1	1	1	118782	122471	119221	373986	348969	305708	1
DG(16:1(9Z)/22:5(7Z,10Z,13Z,16Z,19Z)/0:0)	1	1	1	1	1	1	1	1	1	460787	1	439027	1	1	1	29748	356450	487822	1	1	1	1	1	1	380445	392566	369626	1	1	1	1	1	1	24833	1	41000	82047	77984	78725	1	1	1	118782	122471	119221	373986	348969	305708	1
DG(16:1(9Z)/22:5(4Z,7Z,10Z,13Z,16Z)/0:0)	1	1	1	1	1	1	1	1	1	460787	1	439027	1	1	1	29748	356450	487822	1	1	1	1	1	1	380445	392566	369626	1	1	1	1	1	1	24833	1	41000	82047	77984	78725	1	1	1	118782	122471	119221	373986	348969	305708	1
DG(18:3(9Z,12Z,15Z)/20:3(8Z,11Z,14Z)/0:0)	1	1	1	1	1	1	1	1	1	460787	1	439027	1	1	1	29748	356450	487822	1	1	1	1	1	1	380445	392566	369626	1	1	1	1	1	1	24833	1	41000	82047	77984	78725	1	1	1	118782	122471	119221	373986	348969	305708	1
DG(18:3(9Z,12Z,15Z)/20:3(5Z,8Z,11Z)/0:0)	1	1	1	1	1	1	1	1	1	460787	1	439027	1	1	1	29748	356450	487822	1	1	1	1	1	1	380445	392566	369626	1	1	1	1	1	1	24833	1	41000	82047	77984	78725	1	1	1	118782	122471	119221	373986	348969	305708	1
DG(18:1n9/0:0/20:5n3)	1	1	1	1	1	1	1	1	1	460787	1	439027	1	1	1	29748	356450	487822	1	1	1	1	1	1	380445	392566	369626	1	1	1	1	1	1	24833	1	41000	82047	77984	78725	1	1	1	118782	122471	119221	373986	348969	305708	1
DG(18:3(6Z,9Z,12Z)/20:3(8Z,11Z,14Z)/0:0)	1	1	1	1	1	1	1	1	1	460787	1	439027	1	1	1	29748	356450	487822	1	1	1	1	1	1	380445	392566	369626	1	1	1	1	1	1	24833	1	41000	82047	77984	78725	1	1	1	118782	122471	119221	373986	348969	305708	1
DG(16:0/22:6(4Z,7Z,10Z,13Z,16Z,19Z)/0:0)	1	1	1	1	1	1	1	1	1	460787	1	439027	1	1	1	29748	356450	487822	1	1	1	1	1	1	380445	392566	369626	1	1	1	1	1	1	24833	1	41000	82047	77984	78725	1	1	1	118782	122471	119221	373986	348969	305708	1
DG(18:4(6Z,9Z,12Z,15Z)/20:2(11Z,14Z)/0:0)	1	1	1	1	1	1	1	1	1	460787	1	439027	1	1	1	29748	356450	487822	1	1	1	1	1	1	380445	392566	369626	1	1	1	1	1	1	24833	1	41000	82047	77984	78725	1	1	1	118782	122471	119221	373986	348969	305708	1
DG(20:2(11Z,14Z)/18:4(6Z,9Z,12Z,15Z)/0:0)	1	1	1	1	1	1	1	1	1	460787	1	439027	1	1	1	29748	356450	487822	1	1	1	1	1	1	380445	392566	369626	1	1	1	1	1	1	24833	1	41000	82047	77984	78725	1	1	1	118782	122471	119221	373986	348969	305708	1
DG(20:4(5Z,8Z,11Z,14Z)/18:2(9Z,12Z)/0:0)	1	1	1	1	1	1	1	1	1	460787	1	439027	1	1	1	29748	356450	487822	1	1	1	1	1	1	380445	392566	369626	1	1	1	1	1	1	24833	1	41000	82047	77984	78725	1	1	1	118782	122471	119221	373986	348969	305708	1
DG(20:5(5Z,8Z,11Z,14Z,17Z)/18:1(11Z)/0:0)	1	1	1	1	1	1	1	1	1	460787	1	439027	1	1	1	29748	356450	487822	1	1	1	1	1	1	380445	392566	369626	1	1	1	1	1	1	24833	1	41000	82047	77984	78725	1	1	1	118782	122471	119221	373986	348969	305708	1
DG(20:3(8Z,11Z,14Z)/18:3(6Z,9Z,12Z)/0:0)	1	1	1	1	1	1	1	1	1	460787	1	439027	1	1	1	29748	356450	487822	1	1	1	1	1	1	380445	392566	369626	1	1	1	1	1	1	24833	1	41000	82047	77984	78725	1	1	1	118782	122471	119221	373986	348969	305708	1
DG(18:1(11Z)/20:5(5Z,8Z,11Z,14Z,17Z)/0:0)	1	1	1	1	1	1	1	1	1	460787	1	439027	1	1	1	29748	356450	487822	1	1	1	1	1	1	380445	392566	369626	1	1	1	1	1	1	24833	1	41000	82047	77984	78725	1	1	1	118782	122471	119221	373986	348969	305708	1
DG(18:3(6Z,9Z,12Z)/20:3(5Z,8Z,11Z)/0:0)	1	1	1	1	1	1	1	1	1	460787	1	439027	1	1	1	29748	356450	487822	1	1	1	1	1	1	380445	392566	369626	1	1	1	1	1	1	24833	1	41000	82047	77984	78725	1	1	1	118782	122471	119221	373986	348969	305708	1
DG(20:2n6/0:0/18:4n3)	1	1	1	1	1	1	1	1	1	460787	1	439027	1	1	1	29748	356450	487822	1	1	1	1	1	1	380445	392566	369626	1	1	1	1	1	1	24833	1	41000	82047	77984	78725	1	1	1	118782	122471	119221	373986	348969	305708	1
DG(16:1n7/0:0/22:5n3)	1	1	1	1	1	1	1	1	1	460787	1	439027	1	1	1	29748	356450	487822	1	1	1	1	1	1	380445	392566	369626	1	1	1	1	1	1	24833	1	41000	82047	77984	78725	1	1	1	118782	122471	119221	373986	348969	305708	1
DG(16:1n7/0:0/22:5n6)	1	1	1	1	1	1	1	1	1	460787	1	439027	1	1	1	29748	356450	487822	1	1	1	1	1	1	380445	392566	369626	1	1	1	1	1	1	24833	1	41000	82047	77984	78725	1	1	1	118782	122471	119221	373986	348969	305708	1
DG(20:5(5Z,8Z,11Z,14Z,17Z)/18:1(9Z)/0:0)	1	1	1	1	1	1	1	1	1	460787	1	439027	1	1	1	29748	356450	487822	1	1	1	1	1	1	380445	392566	369626	1	1	1	1	1	1	24833	1	41000	82047	77984	78725	1	1	1	118782	122471	119221	373986	348969	305708	1
DG(18:2(9Z,12Z)/20:4(8Z,11Z,14Z,17Z)/0:0)	1	1	1	1	1	1	1	1	1	460787	1	439027	1	1	1	29748	356450	487822	1	1	1	1	1	1	380445	392566	369626	1	1	1	1	1	1	24833	1	41000	82047	77984	78725	1	1	1	118782	122471	119221	373986	348969	305708	1
DG(20:3(5Z,8Z,11Z)/18:3(9Z,12Z,15Z)/0:0)	1	1	1	1	1	1	1	1	1	460787	1	439027	1	1	1	29748	356450	487822	1	1	1	1	1	1	380445	392566	369626	1	1	1	1	1	1	24833	1	41000	82047	77984	78725	1	1	1	118782	122471	119221	373986	348969	305708	1
DG(18:3n6/0:0/20:3n6)	1	1	1	1	1	1	1	1	1	460787	1	439027	1	1	1	29748	356450	487822	1	1	1	1	1	1	380445	392566	369626	1	1	1	1	1	1	24833	1	41000	82047	77984	78725	1	1	1	118782	122471	119221	373986	348969	305708	1
DG(20:4(8Z,11Z,14Z,17Z)/18:2(9Z,12Z)/0:0)	1	1	1	1	1	1	1	1	1	460787	1	439027	1	1	1	29748	356450	487822	1	1	1	1	1	1	380445	392566	369626	1	1	1	1	1	1	24833	1	41000	82047	77984	78725	1	1	1	118782	122471	119221	373986	348969	305708	1
DG(22:5(7Z,10Z,13Z,16Z,19Z)/16:1(9Z)/0:0)	1	1	1	1	1	1	1	1	1	460787	1	439027	1	1	1	29748	356450	487822	1	1	1	1	1	1	380445	392566	369626	1	1	1	1	1	1	24833	1	41000	82047	77984	78725	1	1	1	118782	122471	119221	373986	348969	305708	1
DG(20:3n9/0:0/18:3n3)	1	1	1	1	1	1	1	1	1	460787	1	439027	1	1	1	29748	356450	487822	1	1	1	1	1	1	380445	392566	369626	1	1	1	1	1	1	24833	1	41000	82047	77984	78725	1	1	1	118782	122471	119221	373986	348969	305708	1
DG(20:3n9/0:0/18:3n6)	1	1	1	1	1	1	1	1	1	460787	1	439027	1	1	1	29748	356450	487822	1	1	1	1	1	1	380445	392566	369626	1	1	1	1	1	1	24833	1	41000	82047	77984	78725	1	1	1	118782	122471	119221	373986	348969	305708	1
DG(22:5(4Z,7Z,10Z,13Z,16Z)/16:1(9Z)/0:0)	1	1	1	1	1	1	1	1	1	460787	1	439027	1	1	1	29748	356450	487822	1	1	1	1	1	1	380445	392566	369626	1	1	1	1	1	1	24833	1	41000	82047	77984	78725	1	1	1	118782	122471	119221	373986	348969	305708	1
DG(20:3(8Z,11Z,14Z)/18:3(9Z,12Z,15Z)/0:0)	1	1	1	1	1	1	1	1	1	460787	1	439027	1	1	1	29748	356450	487822	1	1	1	1	1	1	380445	392566	369626	1	1	1	1	1	1	24833	1	41000	82047	77984	78725	1	1	1	118782	122471	119221	373986	348969	305708	1
DG(16:0/0:0/22:6n3)	1	1	1	1	1	1	1	1	1	460787	1	439027	1	1	1	29748	356450	487822	1	1	1	1	1	1	380445	392566	369626	1	1	1	1	1	1	24833	1	41000	82047	77984	78725	1	1	1	118782	122471	119221	373986	348969	305708	1
DG(18:1(9Z)/20:5(5Z,8Z,11Z,14Z,17Z)/0:0)	1	1	1	1	1	1	1	1	1	460787	1	439027	1	1	1	29748	356450	487822	1	1	1	1	1	1	380445	392566	369626	1	1	1	1	1	1	24833	1	41000	82047	77984	78725	1	1	1	118782	122471	119221	373986	348969	305708	1
DG(22:6(4Z,7Z,10Z,13Z,16Z,19Z)/16:0/0:0)	1	1	1	1	1	1	1	1	1	460787	1	439027	1	1	1	29748	356450	487822	1	1	1	1	1	1	380445	392566	369626	1	1	1	1	1	1	24833	1	41000	82047	77984	78725	1	1	1	118782	122471	119221	373986	348969	305708	1
DG(18:2(9Z,12Z)/20:4(5Z,8Z,11Z,14Z)/0:0)	1	1	1	1	1	1	1	1	1	460787	1	439027	1	1	1	29748	356450	487822	1	1	1	1	1	1	380445	392566	369626	1	1	1	1	1	1	24833	1	41000	82047	77984	78725	1	1	1	118782	122471	119221	373986	348969	305708	1
DG(20:1(11Z)/16:1(9Z)/0:0)	444327	435534	420212	1001520	1114039	1089165	4402105	4380066	4456806	7280261	7416057	7347924	798681	827394	842940	7060812	6921897	7008002	218799	199232	223643	590526	622786	629979	4605143	4728544	4713249	624292	530405	610597	303402	297732	316886	1127732	1171902	1146229	1103872	1181568	1239130	5602905	5088040	5520379	2968918	2995356	3018550	5568467	5592755	5121073	753760
DG(20:2(11Z,14Z)/16:0/0:0)	444327	435534	420212	1001520	1114039	1089165	4402105	4380066	4456806	7280261	7416057	7347924	798681	827394	842940	7060812	6921897	7008002	218799	199232	223643	590526	622786	629979	4605143	4728544	4713249	624292	530405	610597	303402	297732	316886	1127732	1171902	1146229	1103872	1181568	1239130	5602905	5088040	5520379	2968918	2995356	3018550	5568467	5592755	5121073	753760
DG(16:1(9Z)/20:1(11Z)/0:0)	444327	435534	420212	1001520	1114039	1089165	4402105	4380066	4456806	7280261	7416057	7347924	798681	827394	842940	7060812	6921897	7008002	218799	199232	223643	590526	622786	629979	4605143	4728544	4713249	624292	530405	610597	303402	297732	316886	1127732	1171902	1146229	1103872	1181568	1239130	5602905	5088040	5520379	2968918	2995356	3018550	5568467	5592755	5121073	753760
DG(14:0/22:2(13Z,16Z)/0:0)	444327	435534	420212	1001520	1114039	1089165	4402105	4380066	4456806	7280261	7416057	7347924	798681	827394	842940	7060812	6921897	7008002	218799	199232	223643	590526	622786	629979	4605143	4728544	4713249	624292	530405	610597	303402	297732	316886	1127732	1171902	1146229	1103872	1181568	1239130	5602905	5088040	5520379	2968918	2995356	3018550	5568467	5592755	5121073	753760
DG(16:0/20:2(11Z,14Z)/0:0)	444327	435534	420212	1001520	1114039	1089165	4402105	4380066	4456806	7280261	7416057	7347924	798681	827394	842940	7060812	6921897	7008002	218799	199232	223643	590526	622786	629979	4605143	4728544	4713249	624292	530405	610597	303402	297732	316886	1127732	1171902	1146229	1103872	1181568	1239130	5602905	5088040	5520379	2968918	2995356	3018550	5568467	5592755	5121073	753760
DG(18:1(11Z)/18:1(9Z)/0:0)	444327	435534	420212	1001520	1114039	1089165	4402105	4380066	4456806	7280261	7416057	7347924	798681	827394	842940	7060812	6921897	7008002	218799	199232	223643	590526	622786	629979	4605143	4728544	4713249	624292	530405	610597	303402	297732	316886	1127732	1171902	1146229	1103872	1181568	1239130	5602905	5088040	5520379	2968918	2995356	3018550	5568467	5592755	5121073	753760
DG(18:0/18:2(9Z,12Z)/0:0)	444327	435534	420212	1001520	1114039	1089165	4402105	4380066	4456806	7280261	7416057	7347924	798681	827394	842940	7060812	6921897	7008002	218799	199232	223643	590526	622786	629979	4605143	4728544	4713249	624292	530405	610597	303402	297732	316886	1127732	1171902	1146229	1103872	1181568	1239130	5602905	5088040	5520379	2968918	2995356	3018550	5568467	5592755	5121073	753760
DG(18:1(11Z)/18:1(11Z)/0:0)	444327	435534	420212	1001520	1114039	1089165	4402105	4380066	4456806	7280261	7416057	7347924	798681	827394	842940	7060812	6921897	7008002	218799	199232	223643	590526	622786	629979	4605143	4728544	4713249	624292	530405	610597	303402	297732	316886	1127732	1171902	1146229	1103872	1181568	1239130	5602905	5088040	5520379	2968918	2995356	3018550	5568467	5592755	5121073	753760
DG(18:0/18:2(9Z,12Z)/0:0)[iso2]	444327	435534	420212	1001520	1114039	1089165	4402105	4380066	4456806	7280261	7416057	7347924	798681	827394	842940	7060812	6921897	7008002	218799	199232	223643	590526	622786	629979	4605143	4728544	4713249	624292	530405	610597	303402	297732	316886	1127732	1171902	1146229	1103872	1181568	1239130	5602905	5088040	5520379	2968918	2995356	3018550	5568467	5592755	5121073	753760
DG(14:1(9Z)/22:1(13Z)/0:0)	444327	435534	420212	1001520	1114039	1089165	4402105	4380066	4456806	7280261	7416057	7347924	798681	827394	842940	7060812	6921897	7008002	218799	199232	223643	590526	622786	629979	4605143	4728544	4713249	624292	530405	610597	303402	297732	316886	1127732	1171902	1146229	1103872	1181568	1239130	5602905	5088040	5520379	2968918	2995356	3018550	5568467	5592755	5121073	753760
DG(16:0/20:2(11Z,14Z)/0:0)[iso2]	444327	435534	420212	1001520	1114039	1089165	4402105	4380066	4456806	7280261	7416057	7347924	798681	827394	842940	7060812	6921897	7008002	218799	199232	223643	590526	622786	629979	4605143	4728544	4713249	624292	530405	610597	303402	297732	316886	1127732	1171902	1146229	1103872	1181568	1239130	5602905	5088040	5520379	2968918	2995356	3018550	5568467	5592755	5121073	753760
DG(16:1n7/0:0/20:1n9)	444327	435534	420212	1001520	1114039	1089165	4402105	4380066	4456806	7280261	7416057	7347924	798681	827394	842940	7060812	6921897	7008002	218799	199232	223643	590526	622786	629979	4605143	4728544	4713249	624292	530405	610597	303402	297732	316886	1127732	1171902	1146229	1103872	1181568	1239130	5602905	5088040	5520379	2968918	2995356	3018550	5568467	5592755	5121073	753760
DG(22:1(13Z)/14:1(9Z)/0:0)	444327	435534	420212	1001520	1114039	1089165	4402105	4380066	4456806	7280261	7416057	7347924	798681	827394	842940	7060812	6921897	7008002	218799	199232	223643	590526	622786	629979	4605143	4728544	4713249	624292	530405	610597	303402	297732	316886	1127732	1171902	1146229	1103872	1181568	1239130	5602905	5088040	5520379	2968918	2995356	3018550	5568467	5592755	5121073	753760
DG(18:1(9Z)/18:1(9Z)/0:0)	444327	435534	420212	1001520	1114039	1089165	4402105	4380066	4456806	7280261	7416057	7347924	798681	827394	842940	7060812	6921897	7008002	218799	199232	223643	590526	622786	629979	4605143	4728544	4713249	624292	530405	610597	303402	297732	316886	1127732	1171902	1146229	1103872	1181568	1239130	5602905	5088040	5520379	2968918	2995356	3018550	5568467	5592755	5121073	753760
DG(14:0/0:0/22:2n6)	444327	435534	420212	1001520	1114039	1089165	4402105	4380066	4456806	7280261	7416057	7347924	798681	827394	842940	7060812	6921897	7008002	218799	199232	223643	590526	622786	629979	4605143	4728544	4713249	624292	530405	610597	303402	297732	316886	1127732	1171902	1146229	1103872	1181568	1239130	5602905	5088040	5520379	2968918	2995356	3018550	5568467	5592755	5121073	753760
DG(18:1n7/0:0/18:1n9)	444327	435534	420212	1001520	1114039	1089165	4402105	4380066	4456806	7280261	7416057	7347924	798681	827394	842940	7060812	6921897	7008002	218799	199232	223643	590526	622786	629979	4605143	4728544	4713249	624292	530405	610597	303402	297732	316886	1127732	1171902	1146229	1103872	1181568	1239130	5602905	5088040	5520379	2968918	2995356	3018550	5568467	5592755	5121073	753760
DG(18:1n7/0:0/18:1n7)	444327	435534	420212	1001520	1114039	1089165	4402105	4380066	4456806	7280261	7416057	7347924	798681	827394	842940	7060812	6921897	7008002	218799	199232	223643	590526	622786	629979	4605143	4728544	4713249	624292	530405	610597	303402	297732	316886	1127732	1171902	1146229	1103872	1181568	1239130	5602905	5088040	5520379	2968918	2995356	3018550	5568467	5592755	5121073	753760
DG(16:0/0:0/20:2n6)	444327	435534	420212	1001520	1114039	1089165	4402105	4380066	4456806	7280261	7416057	7347924	798681	827394	842940	7060812	6921897	7008002	218799	199232	223643	590526	622786	629979	4605143	4728544	4713249	624292	530405	610597	303402	297732	316886	1127732	1171902	1146229	1103872	1181568	1239130	5602905	5088040	5520379	2968918	2995356	3018550	5568467	5592755	5121073	753760
DG(18:2(9Z,12Z)/18:0/0:0)	444327	435534	420212	1001520	1114039	1089165	4402105	4380066	4456806	7280261	7416057	7347924	798681	827394	842940	7060812	6921897	7008002	218799	199232	223643	590526	622786	629979	4605143	4728544	4713249	624292	530405	610597	303402	297732	316886	1127732	1171902	1146229	1103872	1181568	1239130	5602905	5088040	5520379	2968918	2995356	3018550	5568467	5592755	5121073	753760
DG(14:1n5/0:0/22:1n9)	444327	435534	420212	1001520	1114039	1089165	4402105	4380066	4456806	7280261	7416057	7347924	798681	827394	842940	7060812	6921897	7008002	218799	199232	223643	590526	622786	629979	4605143	4728544	4713249	624292	530405	610597	303402	297732	316886	1127732	1171902	1146229	1103872	1181568	1239130	5602905	5088040	5520379	2968918	2995356	3018550	5568467	5592755	5121073	753760
DG(16:1(9Z)/20:1(11Z)/0:0)[iso2]	444327	435534	420212	1001520	1114039	1089165	4402105	4380066	4456806	7280261	7416057	7347924	798681	827394	842940	7060812	6921897	7008002	218799	199232	223643	590526	622786	629979	4605143	4728544	4713249	624292	530405	610597	303402	297732	316886	1127732	1171902	1146229	1103872	1181568	1239130	5602905	5088040	5520379	2968918	2995356	3018550	5568467	5592755	5121073	753760
DG(18:1(9Z)/18:1(11Z)/0:0)	444327	435534	420212	1001520	1114039	1089165	4402105	4380066	4456806	7280261	7416057	7347924	798681	827394	842940	7060812	6921897	7008002	218799	199232	223643	590526	622786	629979	4605143	4728544	4713249	624292	530405	610597	303402	297732	316886	1127732	1171902	1146229	1103872	1181568	1239130	5602905	5088040	5520379	2968918	2995356	3018550	5568467	5592755	5121073	753760
DG(18:1n9/0:0/18:1n9)	444327	435534	420212	1001520	1114039	1089165	4402105	4380066	4456806	7280261	7416057	7347924	798681	827394	842940	7060812	6921897	7008002	218799	199232	223643	590526	622786	629979	4605143	4728544	4713249	624292	530405	610597	303402	297732	316886	1127732	1171902	1146229	1103872	1181568	1239130	5602905	5088040	5520379	2968918	2995356	3018550	5568467	5592755	5121073	753760
DG(22:2(13Z,16Z)/14:0/0:0)	444327	435534	420212	1001520	1114039	1089165	4402105	4380066	4456806	7280261	7416057	7347924	798681	827394	842940	7060812	6921897	7008002	218799	199232	223643	590526	622786	629979	4605143	4728544	4713249	624292	530405	610597	303402	297732	316886	1127732	1171902	1146229	1103872	1181568	1239130	5602905	5088040	5520379	2968918	2995356	3018550	5568467	5592755	5121073	753760
DG(O-16:0/20:4(8E,11E,14E,17E)/0:0)	444327	435534	420212	1001520	1114039	1089165	4402105	4380066	4456806	7280261	7416057	7347924	798681	827394	842940	7060812	6921897	7008002	218799	199232	223643	590526	622786	629979	4605143	4728544	4713249	624292	530405	610597	303402	297732	316886	1127732	1171902	1146229	1103872	1181568	1239130	5602905	5088040	5520379	2968918	2995356	3018550	5568467	5592755	5121073	753760
DG(20:2(11Z,14Z)/18:3(9Z,12Z,15Z)/0:0)	444327	435534	420212	975803	1108258	1077038	1	1	1	370788	390878	373229	1	1	1	433262	434352	449732	218799	199232	223643	590526	622786	623824	4554986	4660674	4707749	609796	524227	594481	303402	292250	316886	1121914	1171902	1146229	1103872	1175885	1198897	1	1	5490963	1	1	1	1	1	1	1
DG(16:0/22:5(7Z,10Z,13Z,16Z,19Z)/0:0)	444327	435534	420212	975803	1108258	1077038	1	1	1	370788	390878	373229	1	1	1	433262	434352	449732	218799	199232	223643	590526	622786	623824	4554986	4660674	4707749	609796	524227	594481	303402	292250	316886	1121914	1171902	1146229	1103872	1175885	1198897	1	1	5490963	1	1	1	1	1	1	1
DG(18:2(9Z,12Z)/20:3(5Z,8Z,11Z)/0:0)	444327	435534	420212	975803	1108258	1077038	1	1	1	370788	390878	373229	1	1	1	433262	434352	449732	218799	199232	223643	590526	622786	623824	4554986	4660674	4707749	609796	524227	594481	303402	292250	316886	1121914	1171902	1146229	1103872	1175885	1198897	1	1	5490963	1	1	1	1	1	1	1
DG(18:1n9/0:0/20:4n3)	444327	435534	420212	975803	1108258	1077038	1	1	1	370788	390878	373229	1	1	1	433262	434352	449732	218799	199232	223643	590526	622786	623824	4554986	4660674	4707749	609796	524227	594481	303402	292250	316886	1121914	1171902	1146229	1103872	1175885	1198897	1	1	5490963	1	1	1	1	1	1	1
DG(18:1n9/0:0/20:4n6)	444327	435534	420212	975803	1108258	1077038	1	1	1	370788	390878	373229	1	1	1	433262	434352	449732	218799	199232	223643	590526	622786	623824	4554986	4660674	4707749	609796	524227	594481	303402	292250	316886	1121914	1171902	1146229	1103872	1175885	1198897	1	1	5490963	1	1	1	1	1	1	1
DG(18:4(6Z,9Z,12Z,15Z)/20:1(11Z)/0:0)	444327	435534	420212	975803	1108258	1077038	1	1	1	370788	390878	373229	1	1	1	433262	434352	449732	218799	199232	223643	590526	622786	623824	4554986	4660674	4707749	609796	524227	594481	303402	292250	316886	1121914	1171902	1146229	1103872	1175885	1198897	1	1	5490963	1	1	1	1	1	1	1
DG(16:0/22:5(4Z,7Z,10Z,13Z,16Z)/0:0)	444327	435534	420212	975803	1108258	1077038	1	1	1	370788	390878	373229	1	1	1	433262	434352	449732	218799	199232	223643	590526	622786	623824	4554986	4660674	4707749	609796	524227	594481	303402	292250	316886	1121914	1171902	1146229	1103872	1175885	1198897	1	1	5490963	1	1	1	1	1	1	1
DG(20:5(5Z,8Z,11Z,14Z,17Z)/18:0/0:0)	444327	435534	420212	975803	1108258	1077038	1	1	1	370788	390878	373229	1	1	1	433262	434352	449732	218799	199232	223643	590526	622786	623824	4554986	4660674	4707749	609796	524227	594481	303402	292250	316886	1121914	1171902	1146229	1103872	1175885	1198897	1	1	5490963	1	1	1	1	1	1	1
DG(22:5(4Z,7Z,10Z,13Z,16Z)/16:0/0:0)	444327	435534	420212	975803	1108258	1077038	1	1	1	370788	390878	373229	1	1	1	433262	434352	449732	218799	199232	223643	590526	622786	623824	4554986	4660674	4707749	609796	524227	594481	303402	292250	316886	1121914	1171902	1146229	1103872	1175885	1198897	1	1	5490963	1	1	1	1	1	1	1
DG(20:4(8Z,11Z,14Z,17Z)/18:1(11Z)/0:0)	444327	435534	420212	975803	1108258	1077038	1	1	1	370788	390878	373229	1	1	1	433262	434352	449732	218799	199232	223643	590526	622786	623824	4554986	4660674	4707749	609796	524227	594481	303402	292250	316886	1121914	1171902	1146229	1103872	1175885	1198897	1	1	5490963	1	1	1	1	1	1	1
DG(18:3(9Z,12Z,15Z)/20:2(11Z,14Z)/0:0)	444327	435534	420212	975803	1108258	1077038	1	1	1	370788	390878	373229	1	1	1	433262	434352	449732	218799	199232	223643	590526	622786	623824	4554986	4660674	4707749	609796	524227	594481	303402	292250	316886	1121914	1171902	1146229	1103872	1175885	1198897	1	1	5490963	1	1	1	1	1	1	1
DG(16:1(9Z)/22:4(7Z,10Z,13Z,16Z)/0:0)	444327	435534	420212	975803	1108258	1077038	1	1	1	370788	390878	373229	1	1	1	433262	434352	449732	218799	199232	223643	590526	622786	623824	4554986	4660674	4707749	609796	524227	594481	303402	292250	316886	1121914	1171902	1146229	1103872	1175885	1198897	1	1	5490963	1	1	1	1	1	1	1
DG(20:2(11Z,14Z)/18:3(6Z,9Z,12Z)/0:0)	444327	435534	420212	975803	1108258	1077038	1	1	1	370788	390878	373229	1	1	1	433262	434352	449732	218799	199232	223643	590526	622786	623824	4554986	4660674	4707749	609796	524227	594481	303402	292250	316886	1121914	1171902	1146229	1103872	1175885	1198897	1	1	5490963	1	1	1	1	1	1	1
DG(18:0/20:5(5Z,8Z,11Z,14Z,17Z)/0:0)	444327	435534	420212	975803	1108258	1077038	1	1	1	370788	390878	373229	1	1	1	433262	434352	449732	218799	199232	223643	590526	622786	623824	4554986	4660674	4707749	609796	524227	594481	303402	292250	316886	1121914	1171902	1146229	1103872	1175885	1198897	1	1	5490963	1	1	1	1	1	1	1
DG(20:1n9/0:0/18:4n3)	444327	435534	420212	975803	1108258	1077038	1	1	1	370788	390878	373229	1	1	1	433262	434352	449732	218799	199232	223643	590526	622786	623824	4554986	4660674	4707749	609796	524227	594481	303402	292250	316886	1121914	1171902	1146229	1103872	1175885	1198897	1	1	5490963	1	1	1	1	1	1	1
DG(22:4(7Z,10Z,13Z,16Z)/16:1(9Z)/0:0)	444327	435534	420212	975803	1108258	1077038	1	1	1	370788	390878	373229	1	1	1	433262	434352	449732	218799	199232	223643	590526	622786	623824	4554986	4660674	4707749	609796	524227	594481	303402	292250	316886	1121914	1171902	1146229	1103872	1175885	1198897	1	1	5490963	1	1	1	1	1	1	1
DG(20:3(5Z,8Z,11Z)/18:2(9Z,12Z)/0:0)	444327	435534	420212	975803	1108258	1077038	1	1	1	370788	390878	373229	1	1	1	433262	434352	449732	218799	199232	223643	590526	622786	623824	4554986	4660674	4707749	609796	524227	594481	303402	292250	316886	1121914	1171902	1146229	1103872	1175885	1198897	1	1	5490963	1	1	1	1	1	1	1
DG(18:1(11Z)/20:4(8Z,11Z,14Z,17Z)/0:0)	444327	435534	420212	975803	1108258	1077038	1	1	1	370788	390878	373229	1	1	1	433262	434352	449732	218799	199232	223643	590526	622786	623824	4554986	4660674	4707749	609796	524227	594481	303402	292250	316886	1121914	1171902	1146229	1103872	1175885	1198897	1	1	5490963	1	1	1	1	1	1	1
DG(18:1(9Z)/20:4(8Z,11Z,14Z,17Z)/0:0)	444327	435534	420212	975803	1108258	1077038	1	1	1	370788	390878	373229	1	1	1	433262	434352	449732	218799	199232	223643	590526	622786	623824	4554986	4660674	4707749	609796	524227	594481	303402	292250	316886	1121914	1171902	1146229	1103872	1175885	1198897	1	1	5490963	1	1	1	1	1	1	1
DG(18:1(11Z)/20:4(5Z,8Z,11Z,14Z)/0:0)	444327	435534	420212	975803	1108258	1077038	1	1	1	370788	390878	373229	1	1	1	433262	434352	449732	218799	199232	223643	590526	622786	623824	4554986	4660674	4707749	609796	524227	594481	303402	292250	316886	1121914	1171902	1146229	1103872	1175885	1198897	1	1	5490963	1	1	1	1	1	1	1
DG(20:3(8Z,11Z,14Z)/18:2(9Z,12Z)/0:0)	444327	435534	420212	975803	1108258	1077038	1	1	1	370788	390878	373229	1	1	1	433262	434352	449732	218799	199232	223643	590526	622786	623824	4554986	4660674	4707749	609796	524227	594481	303402	292250	316886	1121914	1171902	1146229	1103872	1175885	1198897	1	1	5490963	1	1	1	1	1	1	1
DG(16:0/0:0/22:5n6)	444327	435534	420212	975803	1108258	1077038	1	1	1	370788	390878	373229	1	1	1	433262	434352	449732	218799	199232	223643	590526	622786	623824	4554986	4660674	4707749	609796	524227	594481	303402	292250	316886	1121914	1171902	1146229	1103872	1175885	1198897	1	1	5490963	1	1	1	1	1	1	1
DG(16:0/0:0/22:5n3)	444327	435534	420212	975803	1108258	1077038	1	1	1	370788	390878	373229	1	1	1	433262	434352	449732	218799	199232	223643	590526	622786	623824	4554986	4660674	4707749	609796	524227	594481	303402	292250	316886	1121914	1171902	1146229	1103872	1175885	1198897	1	1	5490963	1	1	1	1	1	1	1
DG(20:4(5Z,8Z,11Z,14Z)/18:1(11Z)/0:0)	444327	435534	420212	975803	1108258	1077038	1	1	1	370788	390878	373229	1	1	1	433262	434352	449732	218799	199232	223643	590526	622786	623824	4554986	4660674	4707749	609796	524227	594481	303402	292250	316886	1121914	1171902	1146229	1103872	1175885	1198897	1	1	5490963	1	1	1	1	1	1	1
DG(20:4(8Z,11Z,14Z,17Z)/18:1(9Z)/0:0)	444327	435534	420212	975803	1108258	1077038	1	1	1	370788	390878	373229	1	1	1	433262	434352	449732	218799	199232	223643	590526	622786	623824	4554986	4660674	4707749	609796	524227	594481	303402	292250	316886	1121914	1171902	1146229	1103872	1175885	1198897	1	1	5490963	1	1	1	1	1	1	1
DG(16:1n7/0:0/22:4n6)	444327	435534	420212	975803	1108258	1077038	1	1	1	370788	390878	373229	1	1	1	433262	434352	449732	218799	199232	223643	590526	622786	623824	4554986	4660674	4707749	609796	524227	594481	303402	292250	316886	1121914	1171902	1146229	1103872	1175885	1198897	1	1	5490963	1	1	1	1	1	1	1
DG(18:3(6Z,9Z,12Z)/20:2(11Z,14Z)/0:0)	444327	435534	420212	975803	1108258	1077038	1	1	1	370788	390878	373229	1	1	1	433262	434352	449732	218799	199232	223643	590526	622786	623824	4554986	4660674	4707749	609796	524227	594481	303402	292250	316886	1121914	1171902	1146229	1103872	1175885	1198897	1	1	5490963	1	1	1	1	1	1	1
DG(18:3n6/0:0/20:2n6)	444327	435534	420212	975803	1108258	1077038	1	1	1	370788	390878	373229	1	1	1	433262	434352	449732	218799	199232	223643	590526	622786	623824	4554986	4660674	4707749	609796	524227	594481	303402	292250	316886	1121914	1171902	1146229	1103872	1175885	1198897	1	1	5490963	1	1	1	1	1	1	1
DG(20:1(11Z)/18:4(6Z,9Z,12Z,15Z)/0:0)	444327	435534	420212	975803	1108258	1077038	1	1	1	370788	390878	373229	1	1	1	433262	434352	449732	218799	199232	223643	590526	622786	623824	4554986	4660674	4707749	609796	524227	594481	303402	292250	316886	1121914	1171902	1146229	1103872	1175885	1198897	1	1	5490963	1	1	1	1	1	1	1
DG(18:0/0:0/20:5n3)	444327	435534	420212	975803	1108258	1077038	1	1	1	370788	390878	373229	1	1	1	433262	434352	449732	218799	199232	223643	590526	622786	623824	4554986	4660674	4707749	609796	524227	594481	303402	292250	316886	1121914	1171902	1146229	1103872	1175885	1198897	1	1	5490963	1	1	1	1	1	1	1
DG(22:5(7Z,10Z,13Z,16Z,19Z)/16:0/0:0)	444327	435534	420212	975803	1108258	1077038	1	1	1	370788	390878	373229	1	1	1	433262	434352	449732	218799	199232	223643	590526	622786	623824	4554986	4660674	4707749	609796	524227	594481	303402	292250	316886	1121914	1171902	1146229	1103872	1175885	1198897	1	1	5490963	1	1	1	1	1	1	1
DG(18:2(9Z,12Z)/20:3(8Z,11Z,14Z)/0:0)	444327	435534	420212	975803	1108258	1077038	1	1	1	370788	390878	373229	1	1	1	433262	434352	449732	218799	199232	223643	590526	622786	623824	4554986	4660674	4707749	609796	524227	594481	303402	292250	316886	1121914	1171902	1146229	1103872	1175885	1198897	1	1	5490963	1	1	1	1	1	1	1
DG(20:4(5Z,8Z,11Z,14Z)/18:1(9Z)/0:0)	444327	435534	420212	975803	1108258	1077038	1	1	1	370788	390878	373229	1	1	1	433262	434352	449732	218799	199232	223643	590526	622786	623824	4554986	4660674	4707749	609796	524227	594481	303402	292250	316886	1121914	1171902	1146229	1103872	1175885	1198897	1	1	5490963	1	1	1	1	1	1	1
DG(18:1n7/0:0/20:4n6)	444327	435534	420212	975803	1108258	1077038	1	1	1	370788	390878	373229	1	1	1	433262	434352	449732	218799	199232	223643	590526	622786	623824	4554986	4660674	4707749	609796	524227	594481	303402	292250	316886	1121914	1171902	1146229	1103872	1175885	1198897	1	1	5490963	1	1	1	1	1	1	1
DG(18:1(9Z)/20:4(5Z,8Z,11Z,14Z)/0:0)	444327	435534	420212	975803	1108258	1077038	1	1	1	370788	390878	373229	1	1	1	433262	434352	449732	218799	199232	223643	590526	622786	623824	4554986	4660674	4707749	609796	524227	594481	303402	292250	316886	1121914	1171902	1146229	1103872	1175885	1198897	1	1	5490963	1	1	1	1	1	1	1
DG(18:1n7/0:0/20:4n3)	444327	435534	420212	975803	1108258	1077038	1	1	1	370788	390878	373229	1	1	1	433262	434352	449732	218799	199232	223643	590526	622786	623824	4554986	4660674	4707749	609796	524227	594481	303402	292250	316886	1121914	1171902	1146229	1103872	1175885	1198897	1	1	5490963	1	1	1	1	1	1	1
DG(20:2n6/0:0/18:3n3)	444327	435534	420212	975803	1108258	1077038	272204	279699	1	370788	390878	373229	736665	672096	705309	433262	434352	449732	218799	199232	223643	590526	622786	623824	4554986	4660674	4707749	609796	524227	594481	303402	292250	316886	1121914	1171902	1146229	1103872	1175885	1198897	1	1	5490963	1	2995297	1	1	5493650	1	753760
DG(20:0/0:0/16:1n7)	1609280	1593809	1539248	4855680	5174295	5161592	9679494	9638204	9715433	11646586	11765370	11723353	3071669	3096889	3171236	12889862	12530154	12790821	1287314	1242076	1321075	3384258	3471725	3521533	9519448	9594161	9640105	3095078	2759809	3052793	1449445	1457364	1485200	4533751	4550447	4554998	4442470	4668477	4763605	11597257	10909550	11491158	7643730	7703712	7765893	8456211	8458638	8009789	2936393
DG(18:1(11Z)/18:0/0:0)	1609280	1593809	1539248	4855680	5174295	5161592	9679494	9638204	9715433	11646586	11765370	11723353	3071669	3096889	3171236	12889862	12530154	12790821	1287314	1242076	1321075	3384258	3471725	3521533	9519448	9594161	9640105	3095078	2759809	3052793	1449445	1457364	1485200	4533751	4550447	4554998	4442470	4668477	4763605	11597257	10909550	11491158	7643730	7703712	7765893	8456211	8458638	8009789	2936393
DG(14:0/0:0/22:1n9)	1609280	1593809	1539248	4855680	5174295	5161592	9679494	9638204	9715433	11646586	11765370	11723353	3071669	3096889	3171236	12889862	12530154	12790821	1287314	1242076	1321075	3384258	3471725	3521533	9519448	9594161	9640105	3095078	2759809	3052793	1449445	1457364	1485200	4533751	4550447	4554998	4442470	4668477	4763605	11597257	10909550	11491158	7643730	7703712	7765893	8456211	8458638	8009789	2936393
DG(18:1(9Z)/18:0/0:0)	1609280	1593809	1539248	4855680	5174295	5161592	9679494	9638204	9715433	11646586	11765370	11723353	3071669	3096889	3171236	12889862	12530154	12790821	1287314	1242076	1321075	3384258	3471725	3521533	9519448	9594161	9640105	3095078	2759809	3052793	1449445	1457364	1485200	4533751	4550447	4554998	4442470	4668477	4763605	11597257	10909550	11491158	7643730	7703712	7765893	8456211	8458638	8009789	2936393
DG(18:0/0:0/18:1n7)	1609280	1593809	1539248	4855680	5174295	5161592	9679494	9638204	9715433	11646586	11765370	11723353	3071669	3096889	3171236	12889862	12530154	12790821	1287314	1242076	1321075	3384258	3471725	3521533	9519448	9594161	9640105	3095078	2759809	3052793	1449445	1457364	1485200	4533751	4550447	4554998	4442470	4668477	4763605	11597257	10909550	11491158	7643730	7703712	7765893	8456211	8458638	8009789	2936393
DG(14:0/22:1(13Z)/0:0)	1609280	1593809	1539248	4855680	5174295	5161592	9679494	9638204	9715433	11646586	11765370	11723353	3071669	3096889	3171236	12889862	12530154	12790821	1287314	1242076	1321075	3384258	3471725	3521533	9519448	9594161	9640105	3095078	2759809	3052793	1449445	1457364	1485200	4533751	4550447	4554998	4442470	4668477	4763605	11597257	10909550	11491158	7643730	7703712	7765893	8456211	8458638	8009789	2936393
DG(18:0/0:0/18:1n9)	1609280	1593809	1539248	4855680	5174295	5161592	9679494	9638204	9715433	11646586	11765370	11723353	3071669	3096889	3171236	12889862	12530154	12790821	1287314	1242076	1321075	3384258	3471725	3521533	9519448	9594161	9640105	3095078	2759809	3052793	1449445	1457364	1485200	4533751	4550447	4554998	4442470	4668477	4763605	11597257	10909550	11491158	7643730	7703712	7765893	8456211	8458638	8009789	2936393
DG(22:0/14:1(9Z)/0:0)	1609280	1593809	1539248	4855680	5174295	5161592	9679494	9638204	9715433	11646586	11765370	11723353	3071669	3096889	3171236	12889862	12530154	12790821	1287314	1242076	1321075	3384258	3471725	3521533	9519448	9594161	9640105	3095078	2759809	3052793	1449445	1457364	1485200	4533751	4550447	4554998	4442470	4668477	4763605	11597257	10909550	11491158	7643730	7703712	7765893	8456211	8458638	8009789	2936393
DG(16:1(9Z)/20:0/0:0)	1609280	1593809	1539248	4855680	5174295	5161592	9679494	9638204	9715433	11646586	11765370	11723353	3071669	3096889	3171236	12889862	12530154	12790821	1287314	1242076	1321075	3384258	3471725	3521533	9519448	9594161	9640105	3095078	2759809	3052793	1449445	1457364	1485200	4533751	4550447	4554998	4442470	4668477	4763605	11597257	10909550	11491158	7643730	7703712	7765893	8456211	8458638	8009789	2936393
DG(16:0/0:0/20:1n9)	1609280	1593809	1539248	4855680	5174295	5161592	9679494	9638204	9715433	11646586	11765370	11723353	3071669	3096889	3171236	12889862	12530154	12790821	1287314	1242076	1321075	3384258	3471725	3521533	9519448	9594161	9640105	3095078	2759809	3052793	1449445	1457364	1485200	4533751	4550447	4554998	4442470	4668477	4763605	11597257	10909550	11491158	7643730	7703712	7765893	8456211	8458638	8009789	2936393
DG(18:0/18:1(11Z)/0:0)	1609280	1593809	1539248	4855680	5174295	5161592	9679494	9638204	9715433	11646586	11765370	11723353	3071669	3096889	3171236	12889862	12530154	12790821	1287314	1242076	1321075	3384258	3471725	3521533	9519448	9594161	9640105	3095078	2759809	3052793	1449445	1457364	1485200	4533751	4550447	4554998	4442470	4668477	4763605	11597257	10909550	11491158	7643730	7703712	7765893	8456211	8458638	8009789	2936393
DG(18:0/18:1(9Z)/0:0)	1609280	1593809	1539248	4855680	5174295	5161592	9679494	9638204	9715433	11646586	11765370	11723353	3071669	3096889	3171236	12889862	12530154	12790821	1287314	1242076	1321075	3384258	3471725	3521533	9519448	9594161	9640105	3095078	2759809	3052793	1449445	1457364	1485200	4533751	4550447	4554998	4442470	4668477	4763605	11597257	10909550	11491158	7643730	7703712	7765893	8456211	8458638	8009789	2936393
DG(22:0/0:0/14:1n5)	1609280	1593809	1539248	4855680	5174295	5161592	9679494	9638204	9715433	11646586	11765370	11723353	3071669	3096889	3171236	12889862	12530154	12790821	1287314	1242076	1321075	3384258	3471725	3521533	9519448	9594161	9640105	3095078	2759809	3052793	1449445	1457364	1485200	4533751	4550447	4554998	4442470	4668477	4763605	11597257	10909550	11491158	7643730	7703712	7765893	8456211	8458638	8009789	2936393
DG(16:0/20:1(11Z)/0:0)	1609280	1593809	1539248	4855680	5174295	5161592	9679494	9638204	9715433	11646586	11765370	11723353	3071669	3096889	3171236	12889862	12530154	12790821	1287314	1242076	1321075	3384258	3471725	3521533	9519448	9594161	9640105	3095078	2759809	3052793	1449445	1457364	1485200	4533751	4550447	4554998	4442470	4668477	4763605	11597257	10909550	11491158	7643730	7703712	7765893	8456211	8458638	8009789	2936393
DG(20:1(11Z)/16:0/0:0)	1609280	1593809	1539248	4855680	5174295	5161592	9679494	9638204	9715433	11646586	11765370	11723353	3071669	3096889	3171236	12889862	12530154	12790821	1287314	1242076	1321075	3384258	3471725	3521533	9519448	9594161	9640105	3095078	2759809	3052793	1449445	1457364	1485200	4533751	4550447	4554998	4442470	4668477	4763605	11597257	10909550	11491158	7643730	7703712	7765893	8456211	8458638	8009789	2936393
DG(20:0/16:1(9Z)/0:0)	1609280	1593809	1539248	4855680	5174295	5161592	9679494	9638204	9715433	11646586	11765370	11723353	3071669	3096889	3171236	12889862	12530154	12790821	1287314	1242076	1321075	3384258	3471725	3521533	9519448	9594161	9640105	3095078	2759809	3052793	1449445	1457364	1485200	4533751	4550447	4554998	4442470	4668477	4763605	11597257	10909550	11491158	7643730	7703712	7765893	8456211	8458638	8009789	2936393
DG(22:1(13Z)/14:0/0:0)	1609280	1593809	1539248	4855680	5174295	5161592	9679494	9638204	9715433	11646586	11765370	11723353	3071669	3096889	3171236	12889862	12530154	12790821	1287314	1242076	1321075	3384258	3471725	3521533	9519448	9594161	9640105	3095078	2759809	3052793	1449445	1457364	1485200	4533751	4550447	4554998	4442470	4668477	4763605	11597257	10909550	11491158	7643730	7703712	7765893	8456211	8458638	8009789	2936393
DG(14:1(9Z)/22:0/0:0)	1609280	1593809	1539248	4855680	5174295	5161592	9679494	9638204	9715433	11646586	11765370	11723353	3071669	3096889	3171236	12889862	12530154	12790821	1287314	1242076	1321075	3384258	3471725	3521533	9519448	9594161	9640105	3095078	2759809	3052793	1449445	1457364	1485200	4533751	4550447	4554998	4442470	4668477	4763605	11597257	10909550	11491158	7643730	7703712	7765893	8456211	8458638	8009789	2936393
DG(20:3(5Z,8Z,11Z)/18:1(11Z)/0:0)	1609280	1581065	1532265	4798977	5156414	5073061	9010134	9025454	9508607	10902327	10657198	10298756	2851452	2659222	2926692	9901144	11306112	12095588	1281296	1222394	1321075	3384258	3466369	3516175	9387842	9433614	9558410	3022727	2665840	3040176	1443945	1451345	1471423	4426935	4550447	4521278	4436284	4625070	4681966	11435480	10718736	11373338	7382324	7646053	7622210	8288248	8273142	7840513	2849175
DG(20:1n9/0:0/18:3n3)	1609280	1581065	1532265	4798977	5156414	5073061	9010134	9025454	9508607	10902327	10657198	10298756	2851452	2659222	2926692	9901144	11306112	12095588	1281296	1222394	1321075	3384258	3466369	3516175	9387842	9433614	9558410	3022727	2665840	3040176	1443945	1451345	1471423	4426935	4550447	4521278	4436284	4625070	4681966	11435480	10718736	11373338	7382324	7646053	7622210	8288248	8273142	7840513	2849175
DG(20:1(11Z)/18:3(6Z,9Z,12Z)/0:0)	1609280	1581065	1532265	4798977	5156414	5073061	9010134	9025454	9508607	10902327	10657198	10298756	2851452	2659222	2926692	9901144	11306112	12095588	1281296	1222394	1321075	3384258	3466369	3516175	9387842	9433614	9558410	3022727	2665840	3040176	1443945	1451345	1471423	4426935	4550447	4521278	4436284	4625070	4681966	11435480	10718736	11373338	7382324	7646053	7622210	8288248	8273142	7840513	2849175
DG(20:1n9/0:0/18:3n6)	1609280	1581065	1532265	4798977	5156414	5073061	9010134	9025454	9508607	10902327	10657198	10298756	2851452	2659222	2926692	9901144	11306112	12095588	1281296	1222394	1321075	3384258	3466369	3516175	9387842	9433614	9558410	3022727	2665840	3040176	1443945	1451345	1471423	4426935	4550447	4521278	4436284	4625070	4681966	11435480	10718736	11373338	7382324	7646053	7622210	8288248	8273142	7840513	2849175
DG(18:0/0:0/20:4n3)	1609280	1581065	1532265	4798977	5156414	5073061	9010134	9025454	9508607	10902327	10657198	10298756	2851452	2659222	2926692	9901144	11306112	12095588	1281296	1222394	1321075	3384258	3466369	3516175	9387842	9433614	9558410	3022727	2665840	3040176	1443945	1451345	1471423	4426935	4550447	4521278	4436284	4625070	4681966	11435480	10718736	11373338	7382324	7646053	7622210	8288248	8273142	7840513	2849175
DG(18:1(9Z)/20:3(8Z,11Z,14Z)/0:0)	1609280	1581065	1532265	4798977	5156414	5073061	9010134	9025454	9508607	10902327	10657198	10298756	2851452	2659222	2926692	9901144	11306112	12095588	1281296	1222394	1321075	3384258	3466369	3516175	9387842	9433614	9558410	3022727	2665840	3040176	1443945	1451345	1471423	4426935	4550447	4521278	4436284	4625070	4681966	11435480	10718736	11373338	7382324	7646053	7622210	8288248	8273142	7840513	2849175
DG(18:1n7/0:0/20:3n6)	1609280	1581065	1532265	4798977	5156414	5073061	9010134	9025454	9508607	10902327	10657198	10298756	2851452	2659222	2926692	9901144	11306112	12095588	1281296	1222394	1321075	3384258	3466369	3516175	9387842	9433614	9558410	3022727	2665840	3040176	1443945	1451345	1471423	4426935	4550447	4521278	4436284	4625070	4681966	11435480	10718736	11373338	7382324	7646053	7622210	8288248	8273142	7840513	2849175
DG(18:3(9Z,12Z,15Z)/20:1(11Z)/0:0)	1609280	1581065	1532265	4798977	5156414	5073061	9010134	9025454	9508607	10902327	10657198	10298756	2851452	2659222	2926692	9901144	11306112	12095588	1281296	1222394	1321075	3384258	3466369	3516175	9387842	9433614	9558410	3022727	2665840	3040176	1443945	1451345	1471423	4426935	4550447	4521278	4436284	4625070	4681966	11435480	10718736	11373338	7382324	7646053	7622210	8288248	8273142	7840513	2849175
DG(18:0/0:0/20:4n6)	1609280	1581065	1532265	4798977	5156414	5073061	9010134	9025454	9508607	10902327	10657198	10298756	2851452	2659222	2926692	9901144	11306112	12095588	1281296	1222394	1321075	3384258	3466369	3516175	9387842	9433614	9558410	3022727	2665840	3040176	1443945	1451345	1471423	4426935	4550447	4521278	4436284	4625070	4681966	11435480	10718736	11373338	7382324	7646053	7622210	8288248	8273142	7840513	2849175
DG(20:4(8Z,11Z,14Z,17Z)/18:0/0:0)	1609280	1581065	1532265	4798977	5156414	5073061	9010134	9025454	9508607	10902327	10657198	10298756	2851452	2659222	2926692	9901144	11306112	12095588	1281296	1222394	1321075	3384258	3466369	3516175	9387842	9433614	9558410	3022727	2665840	3040176	1443945	1451345	1471423	4426935	4550447	4521278	4436284	4625070	4681966	11435480	10718736	11373338	7382324	7646053	7622210	8288248	8273142	7840513	2849175
DG(18:1n7/0:0/20:3n9)	1609280	1581065	1532265	4798977	5156414	5073061	9010134	9025454	9508607	10902327	10657198	10298756	2851452	2659222	2926692	9901144	11306112	12095588	1281296	1222394	1321075	3384258	3466369	3516175	9387842	9433614	9558410	3022727	2665840	3040176	1443945	1451345	1471423	4426935	4550447	4521278	4436284	4625070	4681966	11435480	10718736	11373338	7382324	7646053	7622210	8288248	8273142	7840513	2849175
DG(16:0/0:0/22:4n6)	1609280	1581065	1532265	4798977	5156414	5073061	9010134	9025454	9508607	10902327	10657198	10298756	2851452	2659222	2926692	9901144	11306112	12095588	1281296	1222394	1321075	3384258	3466369	3516175	9387842	9433614	9558410	3022727	2665840	3040176	1443945	1451345	1471423	4426935	4550447	4521278	4436284	4625070	4681966	11435480	10718736	11373338	7382324	7646053	7622210	8288248	8273142	7840513	2849175
DG(18:1n9/0:0/20:3n9)	1609280	1581065	1532265	4798977	5156414	5073061	9010134	9025454	9508607	10902327	10657198	10298756	2851452	2659222	2926692	9901144	11306112	12095588	1281296	1222394	1321075	3384258	3466369	3516175	9387842	9433614	9558410	3022727	2665840	3040176	1443945	1451345	1471423	4426935	4550447	4521278	4436284	4625070	4681966	11435480	10718736	11373338	7382324	7646053	7622210	8288248	8273142	7840513	2849175
DG(18:1n9/0:0/20:3n6)	1609280	1581065	1532265	4798977	5156414	5073061	9010134	9025454	9508607	10902327	10657198	10298756	2851452	2659222	2926692	9901144	11306112	12095588	1281296	1222394	1321075	3384258	3466369	3516175	9387842	9433614	9558410	3022727	2665840	3040176	1443945	1451345	1471423	4426935	4550447	4521278	4436284	4625070	4681966	11435480	10718736	11373338	7382324	7646053	7622210	8288248	8273142	7840513	2849175
DG(20:1(11Z)/18:3(9Z,12Z,15Z)/0:0)	1609280	1581065	1532265	4798977	5156414	5073061	9010134	9025454	9508607	10902327	10657198	10298756	2851452	2659222	2926692	9901144	11306112	12095588	1281296	1222394	1321075	3384258	3466369	3516175	9387842	9433614	9558410	3022727	2665840	3040176	1443945	1451345	1471423	4426935	4550447	4521278	4436284	4625070	4681966	11435480	10718736	11373338	7382324	7646053	7622210	8288248	8273142	7840513	2849175
DG(20:3(5Z,8Z,11Z)/18:1(9Z)/0:0)	1609280	1581065	1532265	4798977	5156414	5073061	9010134	9025454	9508607	10902327	10657198	10298756	2851452	2659222	2926692	9901144	11306112	12095588	1281296	1222394	1321075	3384258	3466369	3516175	9387842	9433614	9558410	3022727	2665840	3040176	1443945	1451345	1471423	4426935	4550447	4521278	4436284	4625070	4681966	11435480	10718736	11373338	7382324	7646053	7622210	8288248	8273142	7840513	2849175
DG(18:0/20:4(5Z,8Z,11Z,14Z)/0:0)	1609280	1581065	1532265	4798977	5156414	5073061	9010134	9025454	9508607	10902327	10657198	10298756	2851452	2659222	2926692	9901144	11306112	12095588	1281296	1222394	1321075	3384258	3466369	3516175	9387842	9433614	9558410	3022727	2665840	3040176	1443945	1451345	1471423	4426935	4550447	4521278	4436284	4625070	4681966	11435480	10718736	11373338	7382324	7646053	7622210	8288248	8273142	7840513	2849175
DG(18:1(9Z)/20:3(5Z,8Z,11Z)/0:0)	1609280	1581065	1532265	4798977	5156414	5073061	9010134	9025454	9508607	10902327	10657198	10298756	2851452	2659222	2926692	9901144	11306112	12095588	1281296	1222394	1321075	3384258	3466369	3516175	9387842	9433614	9558410	3022727	2665840	3040176	1443945	1451345	1471423	4426935	4550447	4521278	4436284	4625070	4681966	11435480	10718736	11373338	7382324	7646053	7622210	8288248	8273142	7840513	2849175
DG(20:0/0:0/18:4n3)	1609280	1581065	1532265	4798977	5156414	5073061	9010134	9025454	9508607	10902327	10657198	10298756	2851452	2659222	2926692	9901144	11306112	12095588	1281296	1222394	1321075	3384258	3466369	3516175	9387842	9433614	9558410	3022727	2665840	3040176	1443945	1451345	1471423	4426935	4550447	4521278	4436284	4625070	4681966	11435480	10718736	11373338	7382324	7646053	7622210	8288248	8273142	7840513	2849175
DG(18:1(11Z)/20:3(8Z,11Z,14Z)/0:0)	1609280	1581065	1532265	4798977	5156414	5073061	9010134	9025454	9508607	10902327	10657198	10298756	2851452	2659222	2926692	9901144	11306112	12095588	1281296	1222394	1321075	3384258	3466369	3516175	9387842	9433614	9558410	3022727	2665840	3040176	1443945	1451345	1471423	4426935	4550447	4521278	4436284	4625070	4681966	11435480	10718736	11373338	7382324	7646053	7622210	8288248	8273142	7840513	2849175
DG(18:0/20:4(8Z,11Z,14Z,17Z)/0:0)	1609280	1581065	1532265	4798977	5156414	5073061	9010134	9025454	9508607	10902327	10657198	10298756	2851452	2659222	2926692	9901144	11306112	12095588	1281296	1222394	1321075	3384258	3466369	3516175	9387842	9433614	9558410	3022727	2665840	3040176	1443945	1451345	1471423	4426935	4550447	4521278	4436284	4625070	4681966	11435480	10718736	11373338	7382324	7646053	7622210	8288248	8273142	7840513	2849175
DG(20:4(5Z,8Z,11Z,14Z)/18:0/0:0)	1609280	1581065	1532265	4798977	5156414	5073061	9010134	9025454	9508607	10902327	10657198	10298756	2851452	2659222	2926692	9901144	11306112	12095588	1281296	1222394	1321075	3384258	3466369	3516175	9387842	9433614	9558410	3022727	2665840	3040176	1443945	1451345	1471423	4426935	4550447	4521278	4436284	4625070	4681966	11435480	10718736	11373338	7382324	7646053	7622210	8288248	8273142	7840513	2849175
DG(20:3(8Z,11Z,14Z)/18:1(11Z)/0:0)	1609280	1581065	1532265	4798977	5156414	5073061	9010134	9025454	9508607	10902327	10657198	10298756	2851452	2659222	2926692	9901144	11306112	12095588	1281296	1222394	1321075	3384258	3466369	3516175	9387842	9433614	9558410	3022727	2665840	3040176	1443945	1451345	1471423	4426935	4550447	4521278	4436284	4625070	4681966	11435480	10718736	11373338	7382324	7646053	7622210	8288248	8273142	7840513	2849175
DG(16:0/22:4(7Z,10Z,13Z,16Z)/0:0)	1609280	1581065	1532265	4798977	5156414	5073061	9010134	9025454	9508607	10902327	10657198	10298756	2851452	2659222	2926692	9901144	11306112	12095588	1281296	1222394	1321075	3384258	3466369	3516175	9387842	9433614	9558410	3022727	2665840	3040176	1443945	1451345	1471423	4426935	4550447	4521278	4436284	4625070	4681966	11435480	10718736	11373338	7382324	7646053	7622210	8288248	8273142	7840513	2849175
DG(18:4(6Z,9Z,12Z,15Z)/20:0/0:0)	1609280	1581065	1532265	4798977	5156414	5073061	9010134	9025454	9508607	10902327	10657198	10298756	2851452	2659222	2926692	9901144	11306112	12095588	1281296	1222394	1321075	3384258	3466369	3516175	9387842	9433614	9558410	3022727	2665840	3040176	1443945	1451345	1471423	4426935	4550447	4521278	4436284	4625070	4681966	11435480	10718736	11373338	7382324	7646053	7622210	8288248	8273142	7840513	2849175
DG(18:2(9Z,12Z)/20:2(11Z,14Z)/0:0)	1609280	1581065	1532265	4798977	5156414	5073061	9010134	9025454	9508607	10902327	10657198	10298756	2851452	2659222	2926692	9901144	11306112	12095588	1281296	1222394	1321075	3384258	3466369	3516175	9387842	9433614	9558410	3022727	2665840	3040176	1443945	1451345	1471423	4426935	4550447	4521278	4436284	4625070	4681966	11435480	10718736	11373338	7382324	7646053	7622210	8288248	8273142	7840513	2849175
DG(18:3(6Z,9Z,12Z)/20:1(11Z)/0:0)	1609280	1581065	1532265	4798977	5156414	5073061	9010134	9025454	9508607	10902327	10657198	10298756	2851452	2659222	2926692	9901144	11306112	12095588	1281296	1222394	1321075	3384258	3466369	3516175	9387842	9433614	9558410	3022727	2665840	3040176	1443945	1451345	1471423	4426935	4550447	4521278	4436284	4625070	4681966	11435480	10718736	11373338	7382324	7646053	7622210	8288248	8273142	7840513	2849175
DG(20:3(8Z,11Z,14Z)/18:1(9Z)/0:0)	1609280	1581065	1532265	4798977	5156414	5073061	9010134	9025454	9508607	10902327	10657198	10298756	2851452	2659222	2926692	9901144	11306112	12095588	1281296	1222394	1321075	3384258	3466369	3516175	9387842	9433614	9558410	3022727	2665840	3040176	1443945	1451345	1471423	4426935	4550447	4521278	4436284	4625070	4681966	11435480	10718736	11373338	7382324	7646053	7622210	8288248	8273142	7840513	2849175
DG(20:2(11Z,14Z)/18:2(9Z,12Z)/0:0)	1609280	1581065	1532265	4798977	5156414	5073061	9010134	9025454	9508607	10902327	10657198	10298756	2851452	2659222	2926692	9901144	11306112	12095588	1281296	1222394	1321075	3384258	3466369	3516175	9387842	9433614	9558410	3022727	2665840	3040176	1443945	1451345	1471423	4426935	4550447	4521278	4436284	4625070	4681966	11435480	10718736	11373338	7382324	7646053	7622210	8288248	8273142	7840513	2849175
DG(20:0/18:4(6Z,9Z,12Z,15Z)/0:0)	1609280	1581065	1532265	4798977	5156414	5073061	9010134	9025454	9508607	10902327	10657198	10298756	2851452	2659222	2926692	9901144	11306112	12095588	1281296	1222394	1321075	3384258	3466369	3516175	9387842	9433614	9558410	3022727	2665840	3040176	1443945	1451345	1471423	4426935	4550447	4521278	4436284	4625070	4681966	11435480	10718736	11373338	7382324	7646053	7622210	8288248	8273142	7840513	2849175
DG(22:4(7Z,10Z,13Z,16Z)/16:0/0:0)	1609280	1581065	1532265	4798977	5156414	5073061	9010134	9025454	9508607	10902327	10657198	10298756	2851452	2659222	2926692	9901144	11306112	12095588	1281296	1222394	1321075	3384258	3466369	3516175	9387842	9433614	9558410	3022727	2665840	3040176	1443945	1451345	1471423	4426935	4550447	4521278	4436284	4625070	4681966	11435480	10718736	11373338	7382324	7646053	7622210	8288248	8273142	7840513	2849175
DG(18:1(11Z)/20:2(11Z,14Z)/0:0)	90777	87307	85565	242709	275956	270262	1621141	1601760	1627290	2435871	2505043	2462142	183507	180940	185830	2216144	2190790	2250656	1	1	1	135263	145036	149141	1723696	1792978	1785803	153088	132653	159344	61862	56448	70894	297548	317062	304764	268406	289949	308133	1917185	1651141	1861210	677768	681939	699288	1925801	1952330	1743658	170386
DG(18:3(6Z,9Z,12Z)/20:0/0:0)	90777	87307	85565	242709	275956	270262	1621141	1601760	1627290	2435871	2505043	2462142	183507	180940	185830	2216144	2190790	2250656	1	1	1	135263	145036	149141	1723696	1792978	1785803	153088	132653	159344	61862	56448	70894	297548	317062	304764	268406	289949	308133	1917185	1651141	1861210	677768	681939	699288	1925801	1952330	1743658	170386
DG(16:1n7/0:0/22:2n6)	90777	87307	85565	242709	275956	270262	1621141	1601760	1627290	2435871	2505043	2462142	183507	180940	185830	2216144	2190790	2250656	1	1	1	135263	145036	149141	1723696	1792978	1785803	153088	132653	159344	61862	56448	70894	297548	317062	304764	268406	289949	308133	1917185	1651141	1861210	677768	681939	699288	1925801	1952330	1743658	170386
DG(20:2(11Z,14Z)/18:1(9Z)/0:0)	90777	87307	85565	242709	275956	270262	1621141	1601760	1627290	2435871	2505043	2462142	183507	180940	185830	2216144	2190790	2250656	1	1	1	135263	145036	149141	1723696	1792978	1785803	153088	132653	159344	61862	56448	70894	297548	317062	304764	268406	289949	308133	1917185	1651141	1861210	677768	681939	699288	1925801	1952330	1743658	170386
DG(20:1(11Z)/18:2(9Z,12Z)/0:0)	90777	87307	85565	242709	275956	270262	1621141	1601760	1627290	2435871	2505043	2462142	183507	180940	185830	2216144	2190790	2250656	1	1	1	135263	145036	149141	1723696	1792978	1785803	153088	132653	159344	61862	56448	70894	297548	317062	304764	268406	289949	308133	1917185	1651141	1861210	677768	681939	699288	1925801	1952330	1743658	170386
DG(18:0/20:3(5Z,8Z,11Z)/0:0)	90777	87307	85565	242709	275956	270262	1621141	1601760	1627290	2435871	2505043	2462142	183507	180940	185830	2216144	2190790	2250656	1	1	1	135263	145036	149141	1723696	1792978	1785803	153088	132653	159344	61862	56448	70894	297548	317062	304764	268406	289949	308133	1917185	1651141	1861210	677768	681939	699288	1925801	1952330	1743658	170386
DG(18:0/20:3(8Z,11Z,14Z)/0:0)	90777	87307	85565	242709	275956	270262	1621141	1601760	1627290	2435871	2505043	2462142	183507	180940	185830	2216144	2190790	2250656	1	1	1	135263	145036	149141	1723696	1792978	1785803	153088	132653	159344	61862	56448	70894	297548	317062	304764	268406	289949	308133	1917185	1651141	1861210	677768	681939	699288	1925801	1952330	1743658	170386
DG(20:0/18:3(9Z,12Z,15Z)/0:0)	90777	87307	85565	242709	275956	270262	1621141	1601760	1627290	2435871	2505043	2462142	183507	180940	185830	2216144	2190790	2250656	1	1	1	135263	145036	149141	1723696	1792978	1785803	153088	132653	159344	61862	56448	70894	297548	317062	304764	268406	289949	308133	1917185	1651141	1861210	677768	681939	699288	1925801	1952330	1743658	170386
DG(22:2(13Z,16Z)/16:1(9Z)/0:0)	90777	87307	85565	242709	275956	270262	1621141	1601760	1627290	2435871	2505043	2462142	183507	180940	185830	2216144	2190790	2250656	1	1	1	135263	145036	149141	1723696	1792978	1785803	153088	132653	159344	61862	56448	70894	297548	317062	304764	268406	289949	308133	1917185	1651141	1861210	677768	681939	699288	1925801	1952330	1743658	170386
DG(20:0/0:0/18:3n6)	90777	87307	85565	242709	275956	270262	1621141	1601760	1627290	2435871	2505043	2462142	183507	180940	185830	2216144	2190790	2250656	1	1	1	135263	145036	149141	1723696	1792978	1785803	153088	132653	159344	61862	56448	70894	297548	317062	304764	268406	289949	308133	1917185	1651141	1861210	677768	681939	699288	1925801	1952330	1743658	170386
DG(20:0/0:0/18:3n3)	90777	87307	85565	242709	275956	270262	1621141	1601760	1627290	2435871	2505043	2462142	183507	180940	185830	2216144	2190790	2250656	1	1	1	135263	145036	149141	1723696	1792978	1785803	153088	132653	159344	61862	56448	70894	297548	317062	304764	268406	289949	308133	1917185	1651141	1861210	677768	681939	699288	1925801	1952330	1743658	170386
DG(20:2(11Z,14Z)/18:1(11Z)/0:0)	90777	87307	85565	242709	275956	270262	1621141	1601760	1627290	2435871	2505043	2462142	183507	180940	185830	2216144	2190790	2250656	1	1	1	135263	145036	149141	1723696	1792978	1785803	153088	132653	159344	61862	56448	70894	297548	317062	304764	268406	289949	308133	1917185	1651141	1861210	677768	681939	699288	1925801	1952330	1743658	170386
DG(20:3(5Z,8Z,11Z)/18:0/0:0)	90777	87307	85565	242709	275956	270262	1621141	1601760	1627290	2435871	2505043	2462142	183507	180940	185830	2216144	2190790	2250656	1	1	1	135263	145036	149141	1723696	1792978	1785803	153088	132653	159344	61862	56448	70894	297548	317062	304764	268406	289949	308133	1917185	1651141	1861210	677768	681939	699288	1925801	1952330	1743658	170386
DG(20:0/18:3(6Z,9Z,12Z)/0:0)	90777	87307	85565	242709	275956	270262	1621141	1601760	1627290	2435871	2505043	2462142	183507	180940	185830	2216144	2190790	2250656	1	1	1	135263	145036	149141	1723696	1792978	1785803	153088	132653	159344	61862	56448	70894	297548	317062	304764	268406	289949	308133	1917185	1651141	1861210	677768	681939	699288	1925801	1952330	1743658	170386
DG(20:3(8Z,11Z,14Z)/18:0/0:0)	90777	87307	85565	242709	275956	270262	1621141	1601760	1627290	2435871	2505043	2462142	183507	180940	185830	2216144	2190790	2250656	1	1	1	135263	145036	149141	1723696	1792978	1785803	153088	132653	159344	61862	56448	70894	297548	317062	304764	268406	289949	308133	1917185	1651141	1861210	677768	681939	699288	1925801	1952330	1743658	170386
DG(18:0/0:0/20:3n9)	90777	87307	85565	242709	275956	270262	1621141	1601760	1627290	2435871	2505043	2462142	183507	180940	185830	2216144	2190790	2250656	1	1	1	135263	145036	149141	1723696	1792978	1785803	153088	132653	159344	61862	56448	70894	297548	317062	304764	268406	289949	308133	1917185	1651141	1861210	677768	681939	699288	1925801	1952330	1743658	170386
DG(18:0/0:0/20:3n6)	90777	87307	85565	242709	275956	270262	1621141	1601760	1627290	2435871	2505043	2462142	183507	180940	185830	2216144	2190790	2250656	1	1	1	135263	145036	149141	1723696	1792978	1785803	153088	132653	159344	61862	56448	70894	297548	317062	304764	268406	289949	308133	1917185	1651141	1861210	677768	681939	699288	1925801	1952330	1743658	170386
DG(18:1n7/0:0/20:2n6)	90777	87307	85565	242709	275956	270262	1621141	1601760	1627290	2435871	2505043	2462142	183507	180940	185830	2216144	2190790	2250656	1	1	1	135263	145036	149141	1723696	1792978	1785803	153088	132653	159344	61862	56448	70894	297548	317062	304764	268406	289949	308133	1917185	1651141	1861210	677768	681939	699288	1925801	1952330	1743658	170386
DG(18:1(9Z)/20:2(11Z,14Z)/0:0)	90777	87307	85565	242709	275956	270262	1621141	1601760	1627290	2435871	2505043	2462142	183507	180940	185830	2216144	2190790	2250656	1	1	1	135263	145036	149141	1723696	1792978	1785803	153088	132653	159344	61862	56448	70894	297548	317062	304764	268406	289949	308133	1917185	1651141	1861210	677768	681939	699288	1925801	1952330	1743658	170386
DG(16:1(9Z)/22:2(13Z,16Z)/0:0)	90777	87307	85565	242709	275956	270262	1621141	1601760	1627290	2435871	2505043	2462142	183507	180940	185830	2216144	2190790	2250656	1	1	1	135263	145036	149141	1723696	1792978	1785803	153088	132653	159344	61862	56448	70894	297548	317062	304764	268406	289949	308133	1917185	1651141	1861210	677768	681939	699288	1925801	1952330	1743658	170386
DG(18:2(9Z,12Z)/20:1(11Z)/0:0)	90777	87307	85565	242709	275956	270262	1621141	1601760	1627290	2435871	2505043	2462142	183507	180940	185830	2216144	2190790	2250656	1	1	1	135263	145036	149141	1723696	1792978	1785803	153088	132653	159344	61862	56448	70894	297548	317062	304764	268406	289949	308133	1917185	1651141	1861210	677768	681939	699288	1925801	1952330	1743658	170386
DG(18:3(9Z,12Z,15Z)/20:0/0:0)	90777	87307	85565	242709	275956	270262	1621141	1601760	1627290	2435871	2505043	2462142	183507	180940	185830	2216144	2190790	2250656	1	1	1	135263	145036	149141	1723696	1792978	1785803	153088	132653	159344	61862	56448	70894	297548	317062	304764	268406	289949	308133	1917185	1651141	1861210	677768	681939	699288	1925801	1952330	1743658	170386
DG(18:1n9/0:0/20:2n6)	90777	87307	85565	242709	275956	270262	1621141	1601760	1627290	2435871	2505043	2462142	183507	180940	185830	2216144	2190790	2250656	1	1	1	135263	145036	149141	1723696	1792978	1785803	153088	132653	159344	61862	56448	70894	297548	317062	304764	268406	289949	308133	1917185	1651141	1861210	677768	681939	699288	1925801	1952330	1743658	170386
LysoPC(26:1(5Z))	1	1	1	1	1	1	53768	53236	58063	86254	93117	84515	1	1	1	82098	75437	78018	1	1	1	1	1	1	56213	50915	31940	1	1	1	1	1	1	1	1	1	1	1	1	88853	87351	70116	45362	43454	45433	80427	82383	68527	1
DG(18:2n6/0:0/20:5n3)	180285	167354	1	431426	453121	430206	1362043	1341067	1378309	1507489	1507737	1456922	336568	314164	333095	1332575	1293016	1334767	1	1	1	284171	281704	295227	1372472	1446741	1421591	317996	318680	332489	1	1	1	499518	540004	523177	490706	488490	494423	1493436	1544437	1494813	752114	779508	780868	1462292	1488617	1599454	345468
LysoPC(26:0)	1	1	1	1	1	1	1	1	1	52801	1	38997	1	1	1	1	49918	39530	1	1	1	1	1	1	1	1	1	1	1	1	1	1	1	1	1	1	67339	60116	66474	37006	36635	36902	1	1	1	1	1	1	1
PE(14:0/14:0)	1	1	1	1	1	1	1	1	1	1	1	1	1	1	1	1	1	1	1	1	1	1	1	1	1	1	1	1	1	1	1	1	1	1	1	1	1	1	1	1	1	1	1	1	1	1	1	1	1
DG(18:1n9/0:0/18:2n6)	1	1	1	1	1	1	1	1	1	213434	232874	223700	1	1	1	222650	216378	227258	1	1	1	1	1	1	1	1	1	1	1	1	1	1	1	1	1	1	1	1	1	138127	1	1	1	1	1	1	1	1	1
DG(18:1n7/0:0/18:2n6)	1	1	1	1	1	1	1	1	1	213434	232874	223700	1	1	1	222650	216378	227258	1	1	1	1	1	1	1	1	1	1	1	1	1	1	1	1	1	1	1	1	1	138127	1	1	1	1	1	1	1	1	1
DG(18:2n6/0:0/20:4n6)	1744540	1692684	1645608	2149345	2155073	2156288	3994271	4050762	4062560	5763438	6028037	5847012	2123132	2061777	2109566	5570085	5504238	5585669	1048005	999418	1067513	1691578	1678179	1710438	4045468	4133076	4139564	1880695	1892289	1913873	1410313	1445684	1446235	2733042	2777162	2768366	2991510	2944257	2958477	5400235	5389019	5319669	3899280	3819147	3941832	5141751	5202446	5418788	2089037
DG(18:2n6/0:0/20:4n3)	1744540	1692684	1645608	2149345	2155073	2156288	3994271	4050762	4062560	5763438	6028037	5847012	2123132	2061777	2109566	5570085	5504238	5585669	1048005	999418	1067513	1691578	1678179	1710438	4045468	4133076	4139564	1880695	1892289	1913873	1410313	1445684	1446235	2733042	2777162	2768366	2991510	2944257	2958477	5400235	5389019	5319669	3899280	3819147	3941832	5141751	5202446	5418788	2089037
DG(15:0/0:0/22:2n6)	1	1	1	1	1	1	276184	274650	280890	582231	621645	585278	1	1	1	587421	560112	575425	1	1	1	1	1	1	310285	338166	328379	1	1	1	1	1	1	1	1	1	1	1	1	433646	369543	411122	223991	213694	226833	354756	372508	333501	1
DG(15:0/22:2(13Z,16Z)/0:0)	1	1	1	1	1	1	276184	274650	280890	582231	621645	585278	1	1	1	587421	560112	575425	1	1	1	1	1	1	310285	338166	328379	1	1	1	1	1	1	1	1	1	1	1	1	433646	369543	411122	223991	213694	226833	354756	372508	333501	1
DG(22:2(13Z,16Z)/15:0/0:0)	1	1	1	1	1	1	276184	274650	280890	582231	621645	585278	1	1	1	587421	560112	575425	1	1	1	1	1	1	310285	338166	328379	1	1	1	1	1	1	1	1	1	1	1	1	433646	369543	411122	223991	213694	226833	354756	372508	333501	1
DG(18:0/0:0/18:2n6)	1	1	1	1	1	1	276184	274650	280890	582231	621645	585278	1	1	1	587421	560112	575425	1	1	1	1	1	1	310285	338166	328379	1	1	1	1	1	1	1	1	1	1	1	1	433646	369543	411122	223991	213694	226833	354756	372508	333501	1
DG(20:3n9/0:0/18:2n6)	973787	948708	921701	2211094	2193846	2223756	2232779	2250141	2262818	2073223	2123580	2076923	1398676	1369648	1402881	2845891	2778553	2829712	1229841	1211981	1261792	2377139	2372561	2432606	1899974	1917421	1938252	1993642	2038672	2108877	1198773	1224806	1231795	1911202	1930041	1957122	1962588	1919964	1818875	2078160	2044584	2063257	2519583	2469298	2582008	1586630	1585499	1652240	1686683
DG(18:2n6/0:0/20:3n6)	973787	948708	921701	2211094	2193846	2223756	2232779	2250141	2262818	2073223	2123580	2076923	1398676	1369648	1402881	2845891	2778553	2829712	1229841	1211981	1261792	2377139	2372561	2432606	1899974	1917421	1938252	1993642	2038672	2108877	1198773	1224806	1231795	1911202	1930041	1957122	1962588	1919964	1818875	2078160	2044584	2063257	2519583	2469298	2582008	1586630	1585499	1652240	1686683
DG(18:2n6/0:0/20:2n6)	120397	128851	1	409839	475524	436415	223313	242929	891010	1004046	133058	1	1	1	24743	1	1	990084	1	1	1	319078	348240	338044	957183	1023198	1041356	236327	121286	230935	1	1	1	357833	485224	446155	587032	590618	566481	1521935	1335504	1480416	676687	973209	928522	870318	755538	766301	143437
DG(18:3n3/0:0/20:4n3)	1	1	1	1	1	1	1	1	1	90681	49288	61023	1	1	1	1	1	1	1	1	1	1	1	1	1	1	1	1	1	1	1	1	1	1	1	1	1	1	1	1	1	1	1	1	1	1	1	1	1
DG(22:6(4Z,7Z,10Z,13Z,16Z,19Z)/18:3(6Z,9Z,12Z)/0:0)	1	1	1	1	1	1	1	1	1	218164	231988	210816	1	1	1	171886	1	170992	1	1	1	1	1	1	1	1	1	1	1	1	1	1	1	1	1	1	1	1	1	202418	200570	198924	1	1	1	1	1	159778	1
DG(20:4n6/0:0/20:5n3)	1	1	1	1	1	1	1	1	1	218164	231988	210816	1	1	1	171886	1	170992	1	1	1	1	1	1	1	1	1	1	1	1	1	1	1	1	1	1	1	1	1	202418	200570	198924	1	1	1	1	1	159778	1
DG(22:5n6/0:0/18:4n3)	1	1	1	1	1	1	1	1	1	218164	231988	210816	1	1	1	171886	1	170992	1	1	1	1	1	1	1	1	1	1	1	1	1	1	1	1	1	1	1	1	1	202418	200570	198924	1	1	1	1	1	159778	1
DG(18:4(6Z,9Z,12Z,15Z)/22:5(4Z,7Z,10Z,13Z,16Z)/0:0)	1	1	1	1	1	1	1	1	1	218164	231988	210816	1	1	1	171886	1	170992	1	1	1	1	1	1	1	1	1	1	1	1	1	1	1	1	1	1	1	1	1	202418	200570	198924	1	1	1	1	1	159778	1
DG(18:3(9Z,12Z,15Z)/22:6(4Z,7Z,10Z,13Z,16Z,19Z)/0:0)	1	1	1	1	1	1	1	1	1	218164	231988	210816	1	1	1	171886	1	170992	1	1	1	1	1	1	1	1	1	1	1	1	1	1	1	1	1	1	1	1	1	202418	200570	198924	1	1	1	1	1	159778	1
DG(22:5(7Z,10Z,13Z,16Z,19Z)/18:4(6Z,9Z,12Z,15Z)/0:0)	1	1	1	1	1	1	1	1	1	218164	231988	210816	1	1	1	171886	1	170992	1	1	1	1	1	1	1	1	1	1	1	1	1	1	1	1	1	1	1	1	1	202418	200570	198924	1	1	1	1	1	159778	1
DG(18:3n3/0:0/22:6n3)	1	1	1	1	1	1	1	1	1	218164	231988	210816	1	1	1	171886	1	170992	1	1	1	1	1	1	1	1	1	1	1	1	1	1	1	1	1	1	1	1	1	202418	200570	198924	1	1	1	1	1	159778	1
DG(22:5(4Z,7Z,10Z,13Z,16Z)/18:4(6Z,9Z,12Z,15Z)/0:0)	1	1	1	1	1	1	1	1	1	218164	231988	210816	1	1	1	171886	1	170992	1	1	1	1	1	1	1	1	1	1	1	1	1	1	1	1	1	1	1	1	1	202418	200570	198924	1	1	1	1	1	159778	1
DG(20:5(5Z,8Z,11Z,14Z,17Z)/20:4(8Z,11Z,14Z,17Z)/0:0)	1	1	1	1	1	1	1	1	1	218164	231988	210816	1	1	1	171886	1	170992	1	1	1	1	1	1	1	1	1	1	1	1	1	1	1	1	1	1	1	1	1	202418	200570	198924	1	1	1	1	1	159778	1
DG(20:4(5Z,8Z,11Z,14Z)/20:5(5Z,8Z,11Z,14Z,17Z)/0:0)	1	1	1	1	1	1	1	1	1	218164	231988	210816	1	1	1	171886	1	170992	1	1	1	1	1	1	1	1	1	1	1	1	1	1	1	1	1	1	1	1	1	202418	200570	198924	1	1	1	1	1	159778	1
DG(20:5(5Z,8Z,11Z,14Z,17Z)/20:4(5Z,8Z,11Z,14Z)/0:0)	1	1	1	1	1	1	1	1	1	218164	231988	210816	1	1	1	171886	1	170992	1	1	1	1	1	1	1	1	1	1	1	1	1	1	1	1	1	1	1	1	1	202418	200570	198924	1	1	1	1	1	159778	1
DG(18:4(6Z,9Z,12Z,15Z)/22:5(7Z,10Z,13Z,16Z,19Z)/0:0)	1	1	1	1	1	1	1	1	1	218164	231988	210816	1	1	1	171886	1	170992	1	1	1	1	1	1	1	1	1	1	1	1	1	1	1	1	1	1	1	1	1	202418	200570	198924	1	1	1	1	1	159778	1
DG(20:4n3/0:0/20:5n3)	1	1	1	1	1	1	1	1	1	218164	231988	210816	1	1	1	171886	1	170992	1	1	1	1	1	1	1	1	1	1	1	1	1	1	1	1	1	1	1	1	1	202418	200570	198924	1	1	1	1	1	159778	1
DG(18:3n6/0:0/22:6n3)	1	1	1	1	1	1	1	1	1	218164	231988	210816	1	1	1	171886	1	170992	1	1	1	1	1	1	1	1	1	1	1	1	1	1	1	1	1	1	1	1	1	202418	200570	198924	1	1	1	1	1	159778	1
DG(18:3(6Z,9Z,12Z)/22:6(4Z,7Z,10Z,13Z,16Z,19Z)/0:0)	1	1	1	1	1	1	1	1	1	218164	231988	210816	1	1	1	171886	1	170992	1	1	1	1	1	1	1	1	1	1	1	1	1	1	1	1	1	1	1	1	1	202418	200570	198924	1	1	1	1	1	159778	1
DG(22:6(4Z,7Z,10Z,13Z,16Z,19Z)/18:3(9Z,12Z,15Z)/0:0)	1	1	1	1	1	1	1	1	1	218164	231988	210816	1	1	1	171886	1	170992	1	1	1	1	1	1	1	1	1	1	1	1	1	1	1	1	1	1	1	1	1	202418	200570	198924	1	1	1	1	1	159778	1
DG(20:4(8Z,11Z,14Z,17Z)/20:5(5Z,8Z,11Z,14Z,17Z)/0:0)	1	1	1	1	1	1	1	1	1	218164	231988	210816	1	1	1	171886	1	170992	1	1	1	1	1	1	1	1	1	1	1	1	1	1	1	1	1	1	1	1	1	202418	200570	198924	1	1	1	1	1	159778	1
DG(18:4n3/0:0/22:5n3)	1	1	1	1	1	1	1	1	1	218164	231988	210816	1	1	1	171886	1	170992	1	1	1	1	1	1	1	1	1	1	1	1	1	1	1	1	1	1	1	1	1	202418	200570	198924	1	1	1	1	1	159778	1
DG(20:4(8Z,11Z,14Z,17Z)/20:4(5Z,8Z,11Z,14Z)/0:0)	1	1	1	264417	269445	276515	272204	279699	281428	370788	390878	373229	154047	155651	1	433262	434352	449732	1	1	1	237471	245419	239011	301070	301051	305994	185197	176332	195823	1	1	1	249681	270482	261242	382148	385446	388446	477123	451329	1	432474	409867	439937	248912	263566	274766	1
DG(18:3(6Z,9Z,12Z)/22:5(7Z,10Z,13Z,16Z,19Z)/0:0)	1	1	1	264417	269445	276515	272204	279699	281428	370788	390878	373229	154047	155651	1	433262	434352	449732	1	1	1	237471	245419	239011	301070	301051	305994	185197	176332	195823	1	1	1	249681	270482	261242	382148	385446	388446	477123	451329	1	432474	409867	439937	248912	263566	274766	1
DG(20:4n3/0:0/20:4n3)	1	1	1	264417	269445	276515	272204	279699	281428	370788	390878	373229	154047	155651	1	433262	434352	449732	1	1	1	237471	245419	239011	301070	301051	305994	185197	176332	195823	1	1	1	249681	270482	261242	382148	385446	388446	477123	451329	1	432474	409867	439937	248912	263566	274766	1
DG(20:5(5Z,8Z,11Z,14Z,17Z)/20:3(5Z,8Z,11Z)/0:0)	1	1	1	264417	269445	276515	272204	279699	281428	370788	390878	373229	154047	155651	1	433262	434352	449732	1	1	1	237471	245419	239011	301070	301051	305994	185197	176332	195823	1	1	1	249681	270482	261242	382148	385446	388446	477123	451329	1	432474	409867	439937	248912	263566	274766	1
DG(20:3(8Z,11Z,14Z)/20:5(5Z,8Z,11Z,14Z,17Z)/0:0)	1	1	1	264417	269445	276515	272204	279699	281428	370788	390878	373229	154047	155651	1	433262	434352	449732	1	1	1	237471	245419	239011	301070	301051	305994	185197	176332	195823	1	1	1	249681	270482	261242	382148	385446	388446	477123	451329	1	432474	409867	439937	248912	263566	274766	1
DG(20:4(8Z,11Z,14Z,17Z)/20:4(8Z,11Z,14Z,17Z)/0:0)	1	1	1	264417	269445	276515	272204	279699	281428	370788	390878	373229	154047	155651	1	433262	434352	449732	1	1	1	237471	245419	239011	301070	301051	305994	185197	176332	195823	1	1	1	249681	270482	261242	382148	385446	388446	477123	451329	1	432474	409867	439937	248912	263566	274766	1
DG(20:5(5Z,8Z,11Z,14Z,17Z)/20:3(8Z,11Z,14Z)/0:0)	1	1	1	264417	269445	276515	272204	279699	281428	370788	390878	373229	154047	155651	1	433262	434352	449732	1	1	1	237471	245419	239011	301070	301051	305994	185197	176332	195823	1	1	1	249681	270482	261242	382148	385446	388446	477123	451329	1	432474	409867	439937	248912	263566	274766	1
DG(20:3n9/0:0/20:5n3)	1	1	1	264417	269445	276515	272204	279699	281428	370788	390878	373229	154047	155651	1	433262	434352	449732	1	1	1	237471	245419	239011	301070	301051	305994	185197	176332	195823	1	1	1	249681	270482	261242	382148	385446	388446	477123	451329	1	432474	409867	439937	248912	263566	274766	1
DG(22:4n6/0:0/18:4n3)	1	1	1	264417	269445	276515	272204	279699	281428	370788	390878	373229	154047	155651	1	433262	434352	449732	1	1	1	237471	245419	239011	301070	301051	305994	185197	176332	195823	1	1	1	249681	270482	261242	382148	385446	388446	477123	451329	1	432474	409867	439937	248912	263566	274766	1
DG(18:3n3/0:0/22:5n3)	1	1	1	264417	269445	276515	272204	279699	281428	370788	390878	373229	154047	155651	1	433262	434352	449732	1	1	1	237471	245419	239011	301070	301051	305994	185197	176332	195823	1	1	1	249681	270482	261242	382148	385446	388446	477123	451329	1	432474	409867	439937	248912	263566	274766	1
DG(20:4(5Z,8Z,11Z,14Z)/20:4(5Z,8Z,11Z,14Z)/0:0)	1	1	1	264417	269445	276515	272204	279699	281428	370788	390878	373229	154047	155651	1	433262	434352	449732	1	1	1	237471	245419	239011	301070	301051	305994	185197	176332	195823	1	1	1	249681	270482	261242	382148	385446	388446	477123	451329	1	432474	409867	439937	248912	263566	274766	1
DG(22:5(7Z,10Z,13Z,16Z,19Z)/18:3(9Z,12Z,15Z)/0:0)	1	1	1	264417	269445	276515	272204	279699	281428	370788	390878	373229	154047	155651	1	433262	434352	449732	1	1	1	237471	245419	239011	301070	301051	305994	185197	176332	195823	1	1	1	249681	270482	261242	382148	385446	388446	477123	451329	1	432474	409867	439937	248912	263566	274766	1
DG(20:4n6/0:0/20:4n6)	1	1	1	264417	269445	276515	272204	279699	281428	370788	390878	373229	154047	155651	1	433262	434352	449732	1	1	1	237471	245419	239011	301070	301051	305994	185197	176332	195823	1	1	1	249681	270482	261242	382148	385446	388446	477123	451329	1	432474	409867	439937	248912	263566	274766	1
DG(20:4n6/0:0/20:4n3)	1	1	1	264417	269445	276515	272204	279699	281428	370788	390878	373229	154047	155651	1	433262	434352	449732	1	1	1	237471	245419	239011	301070	301051	305994	185197	176332	195823	1	1	1	249681	270482	261242	382148	385446	388446	477123	451329	1	432474	409867	439937	248912	263566	274766	1
DG(18:4(6Z,9Z,12Z,15Z)/22:4(7Z,10Z,13Z,16Z)/0:0)	1	1	1	264417	269445	276515	272204	279699	281428	370788	390878	373229	154047	155651	1	433262	434352	449732	1	1	1	237471	245419	239011	301070	301051	305994	185197	176332	195823	1	1	1	249681	270482	261242	382148	385446	388446	477123	451329	1	432474	409867	439937	248912	263566	274766	1
DG(20:3n6/0:0/20:5n3)	1	1	1	264417	269445	276515	272204	279699	281428	370788	390878	373229	154047	155651	1	433262	434352	449732	1	1	1	237471	245419	239011	301070	301051	305994	185197	176332	195823	1	1	1	249681	270482	261242	382148	385446	388446	477123	451329	1	432474	409867	439937	248912	263566	274766	1
DG(20:4(5Z,8Z,11Z,14Z)/20:4(8Z,11Z,14Z,17Z)/0:0)	1	1	1	264417	269445	276515	272204	279699	281428	370788	390878	373229	154047	155651	1	433262	434352	449732	1	1	1	237471	245419	239011	301070	301051	305994	185197	176332	195823	1	1	1	249681	270482	261242	382148	385446	388446	477123	451329	1	432474	409867	439937	248912	263566	274766	1
DG(18:2(9Z,12Z)/22:6(4Z,7Z,10Z,13Z,16Z,19Z)/0:0)	1	1	1	264417	269445	276515	272204	279699	281428	370788	390878	373229	154047	155651	1	433262	434352	449732	1	1	1	237471	245419	239011	301070	301051	305994	185197	176332	195823	1	1	1	249681	270482	261242	382148	385446	388446	477123	451329	1	432474	409867	439937	248912	263566	274766	1
DG(22:5(7Z,10Z,13Z,16Z,19Z)/18:3(6Z,9Z,12Z)/0:0)	1	1	1	264417	269445	276515	272204	279699	281428	370788	390878	373229	154047	155651	1	433262	434352	449732	1	1	1	237471	245419	239011	301070	301051	305994	185197	176332	195823	1	1	1	249681	270482	261242	382148	385446	388446	477123	451329	1	432474	409867	439937	248912	263566	274766	1
DG(20:3(5Z,8Z,11Z)/20:5(5Z,8Z,11Z,14Z,17Z)/0:0)	1	1	1	264417	269445	276515	272204	279699	281428	370788	390878	373229	154047	155651	1	433262	434352	449732	1	1	1	237471	245419	239011	301070	301051	305994	185197	176332	195823	1	1	1	249681	270482	261242	382148	385446	388446	477123	451329	1	432474	409867	439937	248912	263566	274766	1
DG(22:6(4Z,7Z,10Z,13Z,16Z,19Z)/18:2(9Z,12Z)/0:0)	1	1	1	264417	269445	276515	272204	279699	281428	370788	390878	373229	154047	155651	1	433262	434352	449732	1	1	1	237471	245419	239011	301070	301051	305994	185197	176332	195823	1	1	1	249681	270482	261242	382148	385446	388446	477123	451329	1	432474	409867	439937	248912	263566	274766	1
DG(18:3n6/0:0/22:5n6)	1	1	1	264417	269445	276515	272204	279699	281428	370788	390878	373229	154047	155651	1	433262	434352	449732	1	1	1	237471	245419	239011	301070	301051	305994	185197	176332	195823	1	1	1	249681	270482	261242	382148	385446	388446	477123	451329	1	432474	409867	439937	248912	263566	274766	1
DG(18:3n6/0:0/22:5n3)	1	1	1	264417	269445	276515	272204	279699	281428	370788	390878	373229	154047	155651	1	433262	434352	449732	1	1	1	237471	245419	239011	301070	301051	305994	185197	176332	195823	1	1	1	249681	270482	261242	382148	385446	388446	477123	451329	1	432474	409867	439937	248912	263566	274766	1
DG(18:3(9Z,12Z,15Z)/22:5(7Z,10Z,13Z,16Z,19Z)/0:0)	1	1	1	264417	269445	276515	272204	279699	281428	370788	390878	373229	154047	155651	1	433262	434352	449732	1	1	1	237471	245419	239011	301070	301051	305994	185197	176332	195823	1	1	1	249681	270482	261242	382148	385446	388446	477123	451329	1	432474	409867	439937	248912	263566	274766	1
DG(22:5(4Z,7Z,10Z,13Z,16Z)/18:3(9Z,12Z,15Z)/0:0)	1	1	1	264417	269445	276515	272204	279699	281428	370788	390878	373229	154047	155651	1	433262	434352	449732	1	1	1	237471	245419	239011	301070	301051	305994	185197	176332	195823	1	1	1	249681	270482	261242	382148	385446	388446	477123	451329	1	432474	409867	439937	248912	263566	274766	1
DG(22:5n6/0:0/18:3n3)	1	1	1	264417	269445	276515	272204	279699	281428	370788	390878	373229	154047	155651	1	433262	434352	449732	1	1	1	237471	245419	239011	301070	301051	305994	185197	176332	195823	1	1	1	249681	270482	261242	382148	385446	388446	477123	451329	1	432474	409867	439937	248912	263566	274766	1
DG(22:5(4Z,7Z,10Z,13Z,16Z)/18:3(6Z,9Z,12Z)/0:0)	1	1	1	264417	269445	276515	272204	279699	281428	370788	390878	373229	154047	155651	1	433262	434352	449732	1	1	1	237471	245419	239011	301070	301051	305994	185197	176332	195823	1	1	1	249681	270482	261242	382148	385446	388446	477123	451329	1	432474	409867	439937	248912	263566	274766	1
DG(22:4(7Z,10Z,13Z,16Z)/18:4(6Z,9Z,12Z,15Z)/0:0)	1	1	1	264417	269445	276515	272204	279699	281428	370788	390878	373229	154047	155651	1	433262	434352	449732	1	1	1	237471	245419	239011	301070	301051	305994	185197	176332	195823	1	1	1	249681	270482	261242	382148	385446	388446	477123	451329	1	432474	409867	439937	248912	263566	274766	1
DG(18:3(6Z,9Z,12Z)/22:5(4Z,7Z,10Z,13Z,16Z)/0:0)	1	1	1	264417	269445	276515	272204	279699	281428	370788	390878	373229	154047	155651	1	433262	434352	449732	1	1	1	237471	245419	239011	301070	301051	305994	185197	176332	195823	1	1	1	249681	270482	261242	382148	385446	388446	477123	451329	1	432474	409867	439937	248912	263566	274766	1
DG(18:3(9Z,12Z,15Z)/22:5(4Z,7Z,10Z,13Z,16Z)/0:0)	1	1	1	264417	269445	276515	272204	279699	281428	370788	390878	373229	154047	155651	1	433262	434352	449732	1	1	1	237471	245419	239011	301070	301051	305994	185197	176332	195823	1	1	1	249681	270482	261242	382148	385446	388446	477123	451329	1	432474	409867	439937	248912	263566	274766	1
SM(d18:1/12:0)	1	1	1	220760	230049	217956	138859	208016	238046	238490	242530	26789	112537	120616	1	114361	158774	276422	1	1	1	202459	203430	206668	243732	248301	248351	163397	160142	172424	1	1	1	212180	220468	216122	304531	307209	310947	380136	363495	362986	336918	327044	343765	212525	208957	228751	1
PE(14:0/P-16:0)	1	1	1	1	1	1	1	1	1	1	1	1	1	1	1	1	1	1	1	1	1	1	1	1	1	1	1	1	1	1	1	1	1	1	1	1	1	1	1	1	1	1	1	1	1	1	1	1	1
PE(P-16:0/14:0)	1	1	1	1	1	1	1	1	1	1	1	1	1	1	1	1	1	1	1	1	1	1	1	1	1	1	1	1	1	1	1	1	1	1	1	1	1	1	1	1	1	1	1	1	1	1	1	1	1
PE(14:1(9Z)/15:0)	1	1	1	1	169932	1	170833	166864	1	186329	188581	179789	1	1	1	205232	191513	206207	1	1	1	1	1	1	180373	197649	189024	1	1	1	1	1	1	1	1	1	1	1	150689	230467	206473	216058	203353	196588	208892	1	159126	1	1
PE(15:0/14:1(9Z))	1	1	1	1	169932	1	170833	166864	1	186329	188581	179789	1	1	1	205232	191513	206207	1	1	1	1	1	1	180373	197649	189024	1	1	1	1	1	1	1	1	1	1	1	150689	230467	206473	216058	203353	196588	208892	1	159126	1	1
PE(14:0/15:0)	1	1	1	1	78792	1	1	1	1	1	1	1	1	1	1	1	1	1	1	1	1	1	1	1	1	1	1	1	1	1	1	1	1	1	1	1	1	1	1	1	1	1	1	66134	1	1	1	1	1
PE(15:0/14:0)	1	1	1	1	78792	1	1	1	1	1	1	1	1	1	1	1	1	1	1	1	1	1	1	1	1	1	1	1	1	1	1	1	1	1	1	1	1	1	1	1	1	1	1	66134	1	1	43614	1	1
Galactosylceramide (d18:1/12:0)	1	1	1	1	1	1	1	1	1	1	1	1	1	1	1	1	1	1	1	1	1	1	1	1	1	1	1	1	1	1	1	1	1	1	1	1	1	1	1	1	1	1	1	1	1	1	1	1	1
DG(20:4(8Z,11Z,14Z,17Z)/20:3(8Z,11Z,14Z)/0:0)	1	1	1	43658	1	43661	1	1	1	23836	1	1	1	1	1	1	89550	435369	1	1	1	1	1	1	1	1	1	1	1	1	1	1	1	37501	1	1	1	1	77499	1	1	1	1	1	1	204269	165165	179141	1
DG(20:2(11Z,14Z)/20:5(5Z,8Z,11Z,14Z,17Z)/0:0)	1	1	1	43658	1	43661	1	1	1	23836	1	1	1	1	1	1	89550	435369	1	1	1	1	1	1	1	1	1	1	1	1	1	1	1	37501	1	1	1	1	77499	1	1	1	1	1	1	204269	165165	179141	1
DG(22:5(7Z,10Z,13Z,16Z,19Z)/18:2(9Z,12Z)/0:0)	1	1	1	43658	1	43661	1	1	1	23836	1	1	1	1	1	1	89550	435369	1	1	1	1	1	1	1	1	1	1	1	1	1	1	1	37501	1	1	1	1	77499	1	1	1	1	1	1	204269	165165	179141	1
DG(18:3(9Z,12Z,15Z)/22:4(7Z,10Z,13Z,16Z)/0:0)	1	1	1	43658	1	43661	1	1	1	23836	1	1	1	1	1	1	89550	435369	1	1	1	1	1	1	1	1	1	1	1	1	1	1	1	37501	1	1	1	1	77499	1	1	1	1	1	1	204269	165165	179141	1
DG(20:3(5Z,8Z,11Z)/20:4(8Z,11Z,14Z,17Z)/0:0)	1	1	1	43658	1	43661	1	1	1	23836	1	1	1	1	1	1	89550	435369	1	1	1	1	1	1	1	1	1	1	1	1	1	1	1	37501	1	1	1	1	77499	1	1	1	1	1	1	204269	165165	179141	1
DG(20:4(8Z,11Z,14Z,17Z)/20:3(5Z,8Z,11Z)/0:0)	1	1	1	43658	1	43661	1	1	1	23836	1	1	1	1	1	1	89550	435369	1	1	1	1	1	1	1	1	1	1	1	1	1	1	1	37501	1	1	1	1	77499	1	1	1	1	1	1	204269	165165	179141	1
DG(22:5(4Z,7Z,10Z,13Z,16Z)/18:2(9Z,12Z)/0:0)	1	1	1	43658	1	43661	1	1	1	23836	1	1	1	1	1	1	89550	435369	1	1	1	1	1	1	1	1	1	1	1	1	1	1	1	37501	1	1	1	1	77499	1	1	1	1	1	1	204269	165165	179141	1
DG(22:6(4Z,7Z,10Z,13Z,16Z,19Z)/18:1(11Z)/0:0)	1	1	1	43658	1	43661	1	1	1	23836	1	1	1	1	1	1	89550	435369	1	1	1	1	1	1	1	1	1	1	1	1	1	1	1	37501	1	1	1	1	77499	1	1	1	1	1	1	204269	165165	179141	1
DG(22:6(4Z,7Z,10Z,13Z,16Z,19Z)/18:1(9Z)/0:0)	1	1	1	43658	1	43661	1	1	1	23836	1	1	1	1	1	1	89550	435369	1	1	1	1	1	1	1	1	1	1	1	1	1	1	1	37501	1	1	1	1	77499	1	1	1	1	1	1	204269	165165	179141	1
DG(20:3(5Z,8Z,11Z)/20:4(5Z,8Z,11Z,14Z)/0:0)	1	1	1	43658	1	43661	1	1	1	23836	1	1	1	1	1	1	89550	435369	1	1	1	1	1	1	1	1	1	1	1	1	1	1	1	37501	1	1	1	1	77499	1	1	1	1	1	1	204269	165165	179141	1
DG(18:2(9Z,12Z)/22:5(7Z,10Z,13Z,16Z,19Z)/0:0)	1	1	1	43658	1	43661	1	1	1	23836	1	1	1	1	1	1	89550	435369	1	1	1	1	1	1	1	1	1	1	1	1	1	1	1	37501	1	1	1	1	77499	1	1	1	1	1	1	204269	165165	179141	1
DG(18:3n6/0:0/22:4n6)	1	1	1	43658	1	43661	1	1	1	23836	1	1	1	1	1	1	89550	435369	1	1	1	1	1	1	1	1	1	1	1	1	1	1	1	37501	1	1	1	1	77499	1	1	1	1	1	1	204269	165165	179141	1
DG(20:3n6/0:0/20:4n3)	1	1	1	43658	1	43661	1	1	1	23836	1	1	1	1	1	1	89550	435369	1	1	1	1	1	1	1	1	1	1	1	1	1	1	1	37501	1	1	1	1	77499	1	1	1	1	1	1	204269	165165	179141	1
DG(20:3n6/0:0/20:4n6)	1	1	1	43658	1	43661	1	1	1	23836	1	1	1	1	1	1	89550	435369	1	1	1	1	1	1	1	1	1	1	1	1	1	1	1	37501	1	1	1	1	77499	1	1	1	1	1	1	204269	165165	179141	1
DG(20:3(8Z,11Z,14Z)/20:4(5Z,8Z,11Z,14Z)/0:0)	1	1	1	43658	1	43661	1	1	1	23836	1	1	1	1	1	1	89550	435369	1	1	1	1	1	1	1	1	1	1	1	1	1	1	1	37501	1	1	1	1	77499	1	1	1	1	1	1	204269	165165	179141	1
DG(18:1n7/0:0/22:6n3)	1	1	1	43658	1	43661	1	1	1	23836	1	1	1	1	1	1	89550	435369	1	1	1	1	1	1	1	1	1	1	1	1	1	1	1	37501	1	1	1	1	77499	1	1	1	1	1	1	204269	165165	179141	1
DG(20:4(5Z,8Z,11Z,14Z)/20:3(8Z,11Z,14Z)/0:0)	1	1	1	43658	1	43661	1	1	1	23836	1	1	1	1	1	1	89550	435369	1	1	1	1	1	1	1	1	1	1	1	1	1	1	1	37501	1	1	1	1	77499	1	1	1	1	1	1	204269	165165	179141	1
DG(18:1n9/0:0/22:6n3)	1	1	1	43658	1	43661	1	1	1	23836	1	1	1	1	1	1	89550	435369	1	1	1	1	1	1	1	1	1	1	1	1	1	1	1	37501	1	1	1	1	77499	1	1	1	1	1	1	204269	165165	179141	1
DG(20:3n9/0:0/20:4n6)	1	1	1	43658	1	43661	1	1	1	23836	1	1	1	1	1	1	89550	435369	1	1	1	1	1	1	1	1	1	1	1	1	1	1	1	37501	1	1	1	1	77499	1	1	1	1	1	1	204269	165165	179141	1
DG(18:3(6Z,9Z,12Z)/22:4(7Z,10Z,13Z,16Z)/0:0)	1	1	1	43658	1	43661	1	1	1	23836	1	1	1	1	1	1	89550	435369	1	1	1	1	1	1	1	1	1	1	1	1	1	1	1	37501	1	1	1	1	77499	1	1	1	1	1	1	204269	165165	179141	1
DG(20:3n9/0:0/20:4n3)	1	1	1	43658	1	43661	1	1	1	23836	1	1	1	1	1	1	89550	435369	1	1	1	1	1	1	1	1	1	1	1	1	1	1	1	37501	1	1	1	1	77499	1	1	1	1	1	1	204269	165165	179141	1
DG(18:2(9Z,12Z)/22:5(4Z,7Z,10Z,13Z,16Z)/0:0)	1	1	1	43658	1	43661	1	1	1	23836	1	1	1	1	1	1	89550	435369	1	1	1	1	1	1	1	1	1	1	1	1	1	1	1	37501	1	1	1	1	77499	1	1	1	1	1	1	204269	165165	179141	1
DG(22:4(7Z,10Z,13Z,16Z)/18:3(6Z,9Z,12Z)/0:0)	1	1	1	43658	1	43661	1	1	1	23836	1	1	1	1	1	1	89550	435369	1	1	1	1	1	1	1	1	1	1	1	1	1	1	1	37501	1	1	1	1	77499	1	1	1	1	1	1	204269	165165	179141	1
DG(18:1(11Z)/22:6(4Z,7Z,10Z,13Z,16Z,19Z)/0:0)	1	1	1	43658	1	43661	1	1	1	23836	1	1	1	1	1	1	89550	435369	1	1	1	1	1	1	1	1	1	1	1	1	1	1	1	37501	1	1	1	1	77499	1	1	1	1	1	1	204269	165165	179141	1
DG(18:1(9Z)/22:6(4Z,7Z,10Z,13Z,16Z,19Z)/0:0)	1	1	1	43658	1	43661	1	1	1	23836	1	1	1	1	1	1	89550	435369	1	1	1	1	1	1	1	1	1	1	1	1	1	1	1	37501	1	1	1	1	77499	1	1	1	1	1	1	204269	165165	179141	1
DG(20:2n6/0:0/20:5n3)	1	1	1	43658	1	43661	1	1	1	23836	1	1	1	1	1	1	89550	435369	1	1	1	1	1	1	1	1	1	1	1	1	1	1	1	37501	1	1	1	1	77499	1	1	1	1	1	1	204269	165165	179141	1
DG(20:4(5Z,8Z,11Z,14Z)/20:3(5Z,8Z,11Z)/0:0)	1	1	1	43658	1	43661	1	1	1	23836	1	1	1	1	1	1	89550	435369	1	1	1	1	1	1	1	1	1	1	1	1	1	1	1	37501	1	1	1	1	77499	1	1	1	1	1	1	204269	165165	179141	1
DG(22:4(7Z,10Z,13Z,16Z)/18:3(9Z,12Z,15Z)/0:0)	1	1	1	43658	1	43661	1	1	1	23836	1	1	1	1	1	1	89550	435369	1	1	1	1	1	1	1	1	1	1	1	1	1	1	1	37501	1	1	1	1	77499	1	1	1	1	1	1	204269	165165	179141	1
DG(20:5(5Z,8Z,11Z,14Z,17Z)/20:2(11Z,14Z)/0:0)	1	1	1	43658	1	43661	1	1	1	23836	1	1	1	1	1	1	89550	435369	1	1	1	1	1	1	1	1	1	1	1	1	1	1	1	37501	1	1	1	1	77499	1	1	1	1	1	1	204269	165165	179141	1
DG(20:3(8Z,11Z,14Z)/20:4(8Z,11Z,14Z,17Z)/0:0)	1	1	1	43658	1	43661	1	1	1	23836	1	1	1	1	1	1	89550	435369	1	1	1	1	1	1	1	1	1	1	1	1	1	1	1	37501	1	1	1	1	77499	1	1	1	1	1	1	204269	165165	179141	1
DG(22:4n6/0:0/18:3n3)	1	1	1	43658	1	43661	127708	25679	271097	23836	1	1	1	1	1	1	89550	435369	1	1	1	1	1	1	296278	308493	289316	1	1	1	1	1	1	37501	1	1	1	1	77499	86194	108550	197357	1	1	1	204269	165165	179141	1
DG(18:0/0:0/22:6n3)	166021	162943	1	1	1	1	1	1	1	1787691	193906	1066939	1	1	1	1	1369517	1879028	82393	83464	95538	1	1	1	1	1	1	81350	1	91457	49268	1	37699	258625	297374	288089	254963	241938	241158	1	1565129	1	1	1	1	1	1	1	1
DG(20:2n6/0:0/20:4n6)	166021	162943	1	1	1	1	1	1	1	1787691	193906	1066939	1	1	1	1	1369517	1879028	82393	83464	95538	1	1	1	1	1	1	81350	1	91457	49268	1	37699	258625	297374	288089	254963	241938	241158	1	1565129	1	1	1	1	1	1	1	1
DG(18:1(9Z)/22:5(7Z,10Z,13Z,16Z,19Z)/0:0)	166021	162943	1	1	1	1	1	1	1	1787691	193906	1066939	1	1	1	1	1369517	1879028	82393	83464	95538	1	1	1	1	1	1	81350	1	91457	49268	1	37699	258625	297374	288089	254963	241938	241158	1	1565129	1	1	1	1	1	1	1	1
DG(20:4(5Z,8Z,11Z,14Z)/20:2(11Z,14Z)/0:0)	166021	162943	1	1	1	1	1	1	1	1787691	193906	1066939	1	1	1	1	1369517	1879028	82393	83464	95538	1	1	1	1	1	1	81350	1	91457	49268	1	37699	258625	297374	288089	254963	241938	241158	1	1565129	1	1	1	1	1	1	1	1
DG(20:2(11Z,14Z)/20:4(8Z,11Z,14Z,17Z)/0:0)	166021	162943	1	1	1	1	1	1	1	1787691	193906	1066939	1	1	1	1	1369517	1879028	82393	83464	95538	1	1	1	1	1	1	81350	1	91457	49268	1	37699	258625	297374	288089	254963	241938	241158	1	1565129	1	1	1	1	1	1	1	1
DG(20:2n6/0:0/20:4n3)	166021	162943	1	1	1	1	1	1	1	1787691	193906	1066939	1	1	1	1	1369517	1879028	82393	83464	95538	1	1	1	1	1	1	81350	1	91457	49268	1	37699	258625	297374	288089	254963	241938	241158	1	1565129	1	1	1	1	1	1	1	1
DG(18:1(9Z)/22:5(4Z,7Z,10Z,13Z,16Z)/0:0)	166021	162943	1	1	1	1	1	1	1	1787691	193906	1066939	1	1	1	1	1369517	1879028	82393	83464	95538	1	1	1	1	1	1	81350	1	91457	49268	1	37699	258625	297374	288089	254963	241938	241158	1	1565129	1	1	1	1	1	1	1	1
DG(22:5(7Z,10Z,13Z,16Z,19Z)/18:1(9Z)/0:0)	166021	162943	1	1	1	1	1	1	1	1787691	193906	1066939	1	1	1	1	1369517	1879028	82393	83464	95538	1	1	1	1	1	1	81350	1	91457	49268	1	37699	258625	297374	288089	254963	241938	241158	1	1565129	1	1	1	1	1	1	1	1
DG(20:5(5Z,8Z,11Z,14Z,17Z)/20:1(11Z)/0:0)	166021	162943	1	1	1	1	1	1	1	1787691	193906	1066939	1	1	1	1	1369517	1879028	82393	83464	95538	1	1	1	1	1	1	81350	1	91457	49268	1	37699	258625	297374	288089	254963	241938	241158	1	1565129	1	1	1	1	1	1	1	1
DG(20:1n9/0:0/20:5n3)	166021	162943	1	1	1	1	1	1	1	1787691	193906	1066939	1	1	1	1	1369517	1879028	82393	83464	95538	1	1	1	1	1	1	81350	1	91457	49268	1	37699	258625	297374	288089	254963	241938	241158	1	1565129	1	1	1	1	1	1	1	1
DG(20:2(11Z,14Z)/20:4(5Z,8Z,11Z,14Z)/0:0)	166021	162943	1	1	1	1	1	1	1	1787691	193906	1066939	1	1	1	1	1369517	1879028	82393	83464	95538	1	1	1	1	1	1	81350	1	91457	49268	1	37699	258625	297374	288089	254963	241938	241158	1	1565129	1	1	1	1	1	1	1	1
DG(20:3n9/0:0/20:3n9)	166021	162943	1	1	1	1	1	1	1	1787691	193906	1066939	1	1	1	1	1369517	1879028	82393	83464	95538	1	1	1	1	1	1	81350	1	91457	49268	1	37699	258625	297374	288089	254963	241938	241158	1	1565129	1	1	1	1	1	1	1	1
DG(20:3n9/0:0/20:3n6)	166021	162943	1	1	1	1	1	1	1	1787691	193906	1066939	1	1	1	1	1369517	1879028	82393	83464	95538	1	1	1	1	1	1	81350	1	91457	49268	1	37699	258625	297374	288089	254963	241938	241158	1	1565129	1	1	1	1	1	1	1	1
DG(20:1(11Z)/20:5(5Z,8Z,11Z,14Z,17Z)/0:0)	166021	162943	1	1	1	1	1	1	1	1787691	193906	1066939	1	1	1	1	1369517	1879028	82393	83464	95538	1	1	1	1	1	1	81350	1	91457	49268	1	37699	258625	297374	288089	254963	241938	241158	1	1565129	1	1	1	1	1	1	1	1
DG(18:0/22:6(4Z,7Z,10Z,13Z,16Z,19Z)/0:0)	166021	162943	1	1	1	1	1	1	1	1787691	193906	1066939	1	1	1	1	1369517	1879028	82393	83464	95538	1	1	1	1	1	1	81350	1	91457	49268	1	37699	258625	297374	288089	254963	241938	241158	1	1565129	1	1	1	1	1	1	1	1
DG(22:2(13Z,16Z)/18:4(6Z,9Z,12Z,15Z)/0:0)	166021	162943	1	1	1	1	1	1	1	1787691	193906	1066939	1	1	1	1	1369517	1879028	82393	83464	95538	1	1	1	1	1	1	81350	1	91457	49268	1	37699	258625	297374	288089	254963	241938	241158	1	1565129	1	1	1	1	1	1	1	1
DG(18:1n9/0:0/22:5n6)	166021	162943	1	1	1	1	1	1	1	1787691	193906	1066939	1	1	1	1	1369517	1879028	82393	83464	95538	1	1	1	1	1	1	81350	1	91457	49268	1	37699	258625	297374	288089	254963	241938	241158	1	1565129	1	1	1	1	1	1	1	1
DG(20:4(8Z,11Z,14Z,17Z)/20:2(11Z,14Z)/0:0)	166021	162943	1	1	1	1	1	1	1	1787691	193906	1066939	1	1	1	1	1369517	1879028	82393	83464	95538	1	1	1	1	1	1	81350	1	91457	49268	1	37699	258625	297374	288089	254963	241938	241158	1	1565129	1	1	1	1	1	1	1	1
DG(18:1n9/0:0/22:5n3)	166021	162943	1	1	1	1	1	1	1	1787691	193906	1066939	1	1	1	1	1369517	1879028	82393	83464	95538	1	1	1	1	1	1	81350	1	91457	49268	1	37699	258625	297374	288089	254963	241938	241158	1	1565129	1	1	1	1	1	1	1	1
DG(18:1(11Z)/22:5(7Z,10Z,13Z,16Z,19Z)/0:0)	166021	162943	1	1	1	1	1	1	1	1787691	193906	1066939	1	1	1	1	1369517	1879028	82393	83464	95538	1	1	1	1	1	1	81350	1	91457	49268	1	37699	258625	297374	288089	254963	241938	241158	1	1565129	1	1	1	1	1	1	1	1
DG(22:4(7Z,10Z,13Z,16Z)/18:2(9Z,12Z)/0:0)	166021	162943	1	1	1	1	1	1	1	1787691	193906	1066939	1	1	1	1	1369517	1879028	82393	83464	95538	1	1	1	1	1	1	81350	1	91457	49268	1	37699	258625	297374	288089	254963	241938	241158	1	1565129	1	1	1	1	1	1	1	1
DG(22:5(7Z,10Z,13Z,16Z,19Z)/18:1(11Z)/0:0)	166021	162943	1	1	1	1	1	1	1	1787691	193906	1066939	1	1	1	1	1369517	1879028	82393	83464	95538	1	1	1	1	1	1	81350	1	91457	49268	1	37699	258625	297374	288089	254963	241938	241158	1	1565129	1	1	1	1	1	1	1	1
DG(18:4(6Z,9Z,12Z,15Z)/22:2(13Z,16Z)/0:0)	166021	162943	1	1	1	1	1	1	1	1787691	193906	1066939	1	1	1	1	1369517	1879028	82393	83464	95538	1	1	1	1	1	1	81350	1	91457	49268	1	37699	258625	297374	288089	254963	241938	241158	1	1565129	1	1	1	1	1	1	1	1
DG(20:3n6/0:0/20:3n6)	166021	162943	1	1	1	1	1	1	1	1787691	193906	1066939	1	1	1	1	1369517	1879028	82393	83464	95538	1	1	1	1	1	1	81350	1	91457	49268	1	37699	258625	297374	288089	254963	241938	241158	1	1565129	1	1	1	1	1	1	1	1
DG(18:2(9Z,12Z)/22:4(7Z,10Z,13Z,16Z)/0:0)	166021	162943	1	1	1	1	1	1	1	1787691	193906	1066939	1	1	1	1	1369517	1879028	82393	83464	95538	1	1	1	1	1	1	81350	1	91457	49268	1	37699	258625	297374	288089	254963	241938	241158	1	1565129	1	1	1	1	1	1	1	1
DG(20:3(5Z,8Z,11Z)/20:3(8Z,11Z,14Z)/0:0)	166021	162943	1	1	1	1	1	1	1	1787691	193906	1066939	1	1	1	1	1369517	1879028	82393	83464	95538	1	1	1	1	1	1	81350	1	91457	49268	1	37699	258625	297374	288089	254963	241938	241158	1	1565129	1	1	1	1	1	1	1	1
DG(22:6(4Z,7Z,10Z,13Z,16Z,19Z)/18:0/0:0)	166021	162943	1	1	1	1	1	1	1	1787691	193906	1066939	1	1	1	1	1369517	1879028	82393	83464	95538	1	1	1	1	1	1	81350	1	91457	49268	1	37699	258625	297374	288089	254963	241938	241158	1	1565129	1	1	1	1	1	1	1	1
DG(18:1n7/0:0/22:5n3)	166021	162943	1	1	1	1	1	1	1	1787691	193906	1066939	1	1	1	1	1369517	1879028	82393	83464	95538	1	1	1	1	1	1	81350	1	91457	49268	1	37699	258625	297374	288089	254963	241938	241158	1	1565129	1	1	1	1	1	1	1	1
DG(18:1(11Z)/22:5(4Z,7Z,10Z,13Z,16Z)/0:0)	166021	162943	1	1	1	1	1	1	1	1787691	193906	1066939	1	1	1	1	1369517	1879028	82393	83464	95538	1	1	1	1	1	1	81350	1	91457	49268	1	37699	258625	297374	288089	254963	241938	241158	1	1565129	1	1	1	1	1	1	1	1
DG(18:1n7/0:0/22:5n6)	166021	162943	1	1	1	1	1	1	1	1787691	193906	1066939	1	1	1	1	1369517	1879028	82393	83464	95538	1	1	1	1	1	1	81350	1	91457	49268	1	37699	258625	297374	288089	254963	241938	241158	1	1565129	1	1	1	1	1	1	1	1
DG(20:3(8Z,11Z,14Z)/20:3(5Z,8Z,11Z)/0:0)	166021	162943	1	1	1	1	1	1	1	1787691	193906	1066939	1	1	1	1	1369517	1879028	82393	83464	95538	1	1	1	1	1	1	81350	1	91457	49268	1	37699	258625	297374	288089	254963	241938	241158	1	1565129	1	1	1	1	1	1	1	1
DG(20:3(5Z,8Z,11Z)/20:3(5Z,8Z,11Z)/0:0)	166021	162943	1	1	1	1	1	1	1	1787691	193906	1066939	1	1	1	1	1369517	1879028	82393	83464	95538	1	1	1	1	1	1	81350	1	91457	49268	1	37699	258625	297374	288089	254963	241938	241158	1	1565129	1	1	1	1	1	1	1	1
DG(22:5(4Z,7Z,10Z,13Z,16Z)/18:1(9Z)/0:0)	166021	162943	1	1	1	1	1	1	1	1787691	193906	1066939	1	1	1	1	1369517	1879028	82393	83464	95538	1	1	1	1	1	1	81350	1	91457	49268	1	37699	258625	297374	288089	254963	241938	241158	1	1565129	1	1	1	1	1	1	1	1
DG(22:5(4Z,7Z,10Z,13Z,16Z)/18:1(11Z)/0:0)	166021	162943	1	1	1	1	1	1	1	1787691	193906	1066939	1	1	1	1	1369517	1879028	82393	83464	95538	1	1	1	1	1	1	81350	1	91457	49268	1	37699	258625	297374	288089	254963	241938	241158	1	1565129	1	1	1	1	1	1	1	1
DG(20:3(8Z,11Z,14Z)/20:3(8Z,11Z,14Z)/0:0)	166021	162943	1	1	1	1	1	1	1	1787691	193906	1066939	1	1	1	1	1369517	1879028	82393	83464	95538	1	1	1	1	1	1	81350	1	91457	49268	1	37699	258625	297374	288089	254963	241938	241158	1	1565129	1	1	1	1	1	1	1	1
DG(16:0/22:2(13Z,16Z)/0:0)	1698352	1674087	1631926	3141628	3322888	3339437	9594672	9585460	9699752	12824953	12828864	12787147	2653976	2648810	2710950	12040168	11782885	12091643	854721	820094	865809	1997852	2039438	2084239	9943665	9975958	10125280	2226610	1981388	2193978	1229823	1230904	1268184	4110446	4138451	4120253	4109465	4308849	4394562	12501845	11831395	12397519	7417088	7472631	7552351	11800024	11918784	11334831	2368686
DG(20:1(11Z)/18:1(9Z)/0:0)	1698352	1674087	1631926	3141628	3322888	3339437	9594672	9585460	9699752	12824953	12828864	12787147	2653976	2648810	2710950	12040168	11782885	12091643	854721	820094	865809	1997852	2039438	2084239	9943665	9975958	10125280	2226610	1981388	2193978	1229823	1230904	1268184	4110446	4138451	4120253	4109465	4308849	4394562	12501845	11831395	12397519	7417088	7472631	7552351	11800024	11918784	11334831	2368686
DG(16:1n7/0:0/22:1n9)	1698352	1674087	1631926	3141628	3322888	3339437	9594672	9585460	9699752	12824953	12828864	12787147	2653976	2648810	2710950	12040168	11782885	12091643	854721	820094	865809	1997852	2039438	2084239	9943665	9975958	10125280	2226610	1981388	2193978	1229823	1230904	1268184	4110446	4138451	4120253	4109465	4308849	4394562	12501845	11831395	12397519	7417088	7472631	7552351	11800024	11918784	11334831	2368686
DG(16:0/0:0/22:2n6)	1698352	1674087	1631926	3141628	3322888	3339437	9594672	9585460	9699752	12824953	12828864	12787147	2653976	2648810	2710950	12040168	11782885	12091643	854721	820094	865809	1997852	2039438	2084239	9943665	9975958	10125280	2226610	1981388	2193978	1229823	1230904	1268184	4110446	4138451	4120253	4109465	4308849	4394562	12501845	11831395	12397519	7417088	7472631	7552351	11800024	11918784	11334831	2368686
DG(18:0/0:0/20:2n6)	1698352	1674087	1631926	3141628	3322888	3339437	9594672	9585460	9699752	12824953	12828864	12787147	2653976	2648810	2710950	12040168	11782885	12091643	854721	820094	865809	1997852	2039438	2084239	9943665	9975958	10125280	2226610	1981388	2193978	1229823	1230904	1268184	4110446	4138451	4120253	4109465	4308849	4394562	12501845	11831395	12397519	7417088	7472631	7552351	11800024	11918784	11334831	2368686
DG(20:0/18:2(9Z,12Z)/0:0)	1698352	1674087	1631926	3141628	3322888	3339437	9594672	9585460	9699752	12824953	12828864	12787147	2653976	2648810	2710950	12040168	11782885	12091643	854721	820094	865809	1997852	2039438	2084239	9943665	9975958	10125280	2226610	1981388	2193978	1229823	1230904	1268184	4110446	4138451	4120253	4109465	4308849	4394562	12501845	11831395	12397519	7417088	7472631	7552351	11800024	11918784	11334831	2368686
DG(18:1n7/0:0/20:1n9)	1698352	1674087	1631926	3141628	3322888	3339437	9594672	9585460	9699752	12824953	12828864	12787147	2653976	2648810	2710950	12040168	11782885	12091643	854721	820094	865809	1997852	2039438	2084239	9943665	9975958	10125280	2226610	1981388	2193978	1229823	1230904	1268184	4110446	4138451	4120253	4109465	4308849	4394562	12501845	11831395	12397519	7417088	7472631	7552351	11800024	11918784	11334831	2368686
DG(18:1(9Z)/20:1(11Z)/0:0)	1698352	1674087	1631926	3141628	3322888	3339437	9594672	9585460	9699752	12824953	12828864	12787147	2653976	2648810	2710950	12040168	11782885	12091643	854721	820094	865809	1997852	2039438	2084239	9943665	9975958	10125280	2226610	1981388	2193978	1229823	1230904	1268184	4110446	4138451	4120253	4109465	4308849	4394562	12501845	11831395	12397519	7417088	7472631	7552351	11800024	11918784	11334831	2368686
DG(18:0/20:2(11Z,14Z)/0:0)	1698352	1674087	1631926	3141628	3322888	3339437	9594672	9585460	9699752	12824953	12828864	12787147	2653976	2648810	2710950	12040168	11782885	12091643	854721	820094	865809	1997852	2039438	2084239	9943665	9975958	10125280	2226610	1981388	2193978	1229823	1230904	1268184	4110446	4138451	4120253	4109465	4308849	4394562	12501845	11831395	12397519	7417088	7472631	7552351	11800024	11918784	11334831	2368686
DG(24:1(15Z)/14:1(9Z)/0:0)	1698352	1674087	1631926	3141628	3322888	3339437	9594672	9585460	9699752	12824953	12828864	12787147	2653976	2648810	2710950	12040168	11782885	12091643	854721	820094	865809	1997852	2039438	2084239	9943665	9975958	10125280	2226610	1981388	2193978	1229823	1230904	1268184	4110446	4138451	4120253	4109465	4308849	4394562	12501845	11831395	12397519	7417088	7472631	7552351	11800024	11918784	11334831	2368686
DG(18:1(11Z)/20:1(11Z)/0:0)	1698352	1674087	1631926	3141628	3322888	3339437	9594672	9585460	9699752	12824953	12828864	12787147	2653976	2648810	2710950	12040168	11782885	12091643	854721	820094	865809	1997852	2039438	2084239	9943665	9975958	10125280	2226610	1981388	2193978	1229823	1230904	1268184	4110446	4138451	4120253	4109465	4308849	4394562	12501845	11831395	12397519	7417088	7472631	7552351	11800024	11918784	11334831	2368686
DG(18:2(9Z,12Z)/20:0/0:0)	1698352	1674087	1631926	3141628	3322888	3339437	9594672	9585460	9699752	12824953	12828864	12787147	2653976	2648810	2710950	12040168	11782885	12091643	854721	820094	865809	1997852	2039438	2084239	9943665	9975958	10125280	2226610	1981388	2193978	1229823	1230904	1268184	4110446	4138451	4120253	4109465	4308849	4394562	12501845	11831395	12397519	7417088	7472631	7552351	11800024	11918784	11334831	2368686
DG(22:2(13Z,16Z)/16:0/0:0)	1698352	1674087	1631926	3141628	3322888	3339437	9594672	9585460	9699752	12824953	12828864	12787147	2653976	2648810	2710950	12040168	11782885	12091643	854721	820094	865809	1997852	2039438	2084239	9943665	9975958	10125280	2226610	1981388	2193978	1229823	1230904	1268184	4110446	4138451	4120253	4109465	4308849	4394562	12501845	11831395	12397519	7417088	7472631	7552351	11800024	11918784	11334831	2368686
DG(16:1(9Z)/22:1(13Z)/0:0)	1698352	1674087	1631926	3141628	3322888	3339437	9594672	9585460	9699752	12824953	12828864	12787147	2653976	2648810	2710950	12040168	11782885	12091643	854721	820094	865809	1997852	2039438	2084239	9943665	9975958	10125280	2226610	1981388	2193978	1229823	1230904	1268184	4110446	4138451	4120253	4109465	4308849	4394562	12501845	11831395	12397519	7417088	7472631	7552351	11800024	11918784	11334831	2368686
DG(14:1n5/0:0/24:1n9)	1698352	1674087	1631926	3141628	3322888	3339437	9594672	9585460	9699752	12824953	12828864	12787147	2653976	2648810	2710950	12040168	11782885	12091643	854721	820094	865809	1997852	2039438	2084239	9943665	9975958	10125280	2226610	1981388	2193978	1229823	1230904	1268184	4110446	4138451	4120253	4109465	4308849	4394562	12501845	11831395	12397519	7417088	7472631	7552351	11800024	11918784	11334831	2368686
DG(20:1(11Z)/18:1(11Z)/0:0)	1698352	1674087	1631926	3141628	3322888	3339437	9594672	9585460	9699752	12824953	12828864	12787147	2653976	2648810	2710950	12040168	11782885	12091643	854721	820094	865809	1997852	2039438	2084239	9943665	9975958	10125280	2226610	1981388	2193978	1229823	1230904	1268184	4110446	4138451	4120253	4109465	4308849	4394562	12501845	11831395	12397519	7417088	7472631	7552351	11800024	11918784	11334831	2368686
DG(18:1n9/0:0/20:1n9)	1698352	1674087	1631926	3141628	3322888	3339437	9594672	9585460	9699752	12824953	12828864	12787147	2653976	2648810	2710950	12040168	11782885	12091643	854721	820094	865809	1997852	2039438	2084239	9943665	9975958	10125280	2226610	1981388	2193978	1229823	1230904	1268184	4110446	4138451	4120253	4109465	4308849	4394562	12501845	11831395	12397519	7417088	7472631	7552351	11800024	11918784	11334831	2368686
DG(14:1(9Z)/24:1(15Z)/0:0)	1698352	1674087	1631926	3141628	3322888	3339437	9594672	9585460	9699752	12824953	12828864	12787147	2653976	2648810	2710950	12040168	11782885	12091643	854721	820094	865809	1997852	2039438	2084239	9943665	9975958	10125280	2226610	1981388	2193978	1229823	1230904	1268184	4110446	4138451	4120253	4109465	4308849	4394562	12501845	11831395	12397519	7417088	7472631	7552351	11800024	11918784	11334831	2368686
DG(20:2(11Z,14Z)/18:0/0:0)	1698352	1674087	1631926	3141628	3322888	3339437	9594672	9585460	9699752	12824953	12828864	12787147	2653976	2648810	2710950	12040168	11782885	12091643	854721	820094	865809	1997852	2039438	2084239	9943665	9975958	10125280	2226610	1981388	2193978	1229823	1230904	1268184	4110446	4138451	4120253	4109465	4308849	4394562	12501845	11831395	12397519	7417088	7472631	7552351	11800024	11918784	11334831	2368686
DG(22:1(13Z)/16:1(9Z)/0:0)	1698352	1674087	1631926	3141628	3322888	3339437	9594672	9585460	9699752	12824953	12828864	12787147	2653976	2648810	2710950	12040168	11782885	12091643	854721	820094	865809	1997852	2039438	2084239	9943665	9975958	10125280	2226610	1981388	2193978	1229823	1230904	1268184	4110446	4138451	4120253	4109465	4308849	4394562	12501845	11831395	12397519	7417088	7472631	7552351	11800024	11918784	11334831	2368686
DG(22:2n6/0:0/18:3n3)	1664824	1640398	1599593	3060129	99654	100404	96908	105180	1	101023	105954	92728	2142156	1911862	2197796	141959	138548	142620	854721	810996	865809	1997852	2039438	2072763	136771	170284	1	2145258	1823149	2135874	1212569	1154204	1244000	90765	1	97941	137509	128176	129702	131439	113483	1	150491	1	143168	60042	54234	65830	2215791
DG(20:3n9/0:0/20:2n6)	1664824	1640398	1599593	3060129	1	1	1	1	1	101023	105954	92728	1	1	1	141959	138548	142620	854721	810996	865809	1997852	2039438	2072763	1	1	1	2145258	1823149	2135874	1212569	1154204	1244000	90765	1	97941	137509	128176	129702	131439	113483	1	150491	1	143168	60042	54234	65830	1
DG(20:4(5Z,8Z,11Z,14Z)/20:1(11Z)/0:0)	1664824	1640398	1599593	3060129	1	1	1	1	1	101023	105954	92728	1	1	1	141959	138548	142620	854721	810996	865809	1997852	2039438	2072763	1	1	1	2145258	1823149	2135874	1212569	1154204	1244000	90765	1	97941	137509	128176	129702	131439	113483	1	150491	1	143168	60042	54234	65830	1
DG(20:2n6/0:0/20:3n6)	1664824	1640398	1599593	3060129	1	1	1	1	1	101023	105954	92728	1	1	1	141959	138548	142620	854721	810996	865809	1997852	2039438	2072763	1	1	1	2145258	1823149	2135874	1212569	1154204	1244000	90765	1	97941	137509	128176	129702	131439	113483	1	150491	1	143168	60042	54234	65830	1
DG(22:1n9/0:0/18:4n3)	1664824	1640398	1599593	3060129	1	1	1	1	1	101023	105954	92728	1	1	1	141959	138548	142620	854721	810996	865809	1997852	2039438	2072763	1	1	1	2145258	1823149	2135874	1212569	1154204	1244000	90765	1	97941	137509	128176	129702	131439	113483	1	150491	1	143168	60042	54234	65830	1
DG(22:2(13Z,16Z)/18:3(9Z,12Z,15Z)/0:0)	1664824	1640398	1599593	3060129	1	1	1	1	1	101023	105954	92728	1	1	1	141959	138548	142620	854721	810996	865809	1997852	2039438	2072763	1	1	1	2145258	1823149	2135874	1212569	1154204	1244000	90765	1	97941	137509	128176	129702	131439	113483	1	150491	1	143168	60042	54234	65830	1
DG(20:3(5Z,8Z,11Z)/20:2(11Z,14Z)/0:0)	1664824	1640398	1599593	3060129	1	1	1	1	1	101023	105954	92728	1	1	1	141959	138548	142620	854721	810996	865809	1997852	2039438	2072763	1	1	1	2145258	1823149	2135874	1212569	1154204	1244000	90765	1	97941	137509	128176	129702	131439	113483	1	150491	1	143168	60042	54234	65830	1
DG(18:1(9Z)/22:4(7Z,10Z,13Z,16Z)/0:0)	1664824	1640398	1599593	3060129	1	1	1	1	1	101023	105954	92728	1	1	1	141959	138548	142620	854721	810996	865809	1997852	2039438	2072763	1	1	1	2145258	1823149	2135874	1212569	1154204	1244000	90765	1	97941	137509	128176	129702	131439	113483	1	150491	1	143168	60042	54234	65830	1
DG(20:1n9/0:0/20:4n3)	1664824	1640398	1599593	3060129	1	1	1	1	1	101023	105954	92728	1	1	1	141959	138548	142620	854721	810996	865809	1997852	2039438	2072763	1	1	1	2145258	1823149	2135874	1212569	1154204	1244000	90765	1	97941	137509	128176	129702	131439	113483	1	150491	1	143168	60042	54234	65830	1
DG(20:1n9/0:0/20:4n6)	1664824	1640398	1599593	3060129	1	1	1	1	1	101023	105954	92728	1	1	1	141959	138548	142620	854721	810996	865809	1997852	2039438	2072763	1	1	1	2145258	1823149	2135874	1212569	1154204	1244000	90765	1	97941	137509	128176	129702	131439	113483	1	150491	1	143168	60042	54234	65830	1
DG(18:3n6/0:0/22:2n6)	1664824	1640398	1599593	3060129	1	1	1	1	1	101023	105954	92728	1	1	1	141959	138548	142620	854721	810996	865809	1997852	2039438	2072763	1	1	1	2145258	1823149	2135874	1212569	1154204	1244000	90765	1	97941	137509	128176	129702	131439	113483	1	150491	1	143168	60042	54234	65830	1
DG(18:3(6Z,9Z,12Z)/22:2(13Z,16Z)/0:0)	1664824	1640398	1599593	3060129	1	1	1	1	1	101023	105954	92728	1	1	1	141959	138548	142620	854721	810996	865809	1997852	2039438	2072763	1	1	1	2145258	1823149	2135874	1212569	1154204	1244000	90765	1	97941	137509	128176	129702	131439	113483	1	150491	1	143168	60042	54234	65830	1
DG(20:5(5Z,8Z,11Z,14Z,17Z)/20:0/0:0)	1664824	1640398	1599593	3060129	1	1	1	1	1	101023	105954	92728	1	1	1	141959	138548	142620	854721	810996	865809	1997852	2039438	2072763	1	1	1	2145258	1823149	2135874	1212569	1154204	1244000	90765	1	97941	137509	128176	129702	131439	113483	1	150491	1	143168	60042	54234	65830	1
DG(18:0/22:5(4Z,7Z,10Z,13Z,16Z)/0:0)	1664824	1640398	1599593	3060129	1	1	1	1	1	101023	105954	92728	1	1	1	141959	138548	142620	854721	810996	865809	1997852	2039438	2072763	1	1	1	2145258	1823149	2135874	1212569	1154204	1244000	90765	1	97941	137509	128176	129702	131439	113483	1	150491	1	143168	60042	54234	65830	1
DG(20:1(11Z)/20:4(8Z,11Z,14Z,17Z)/0:0)	1664824	1640398	1599593	3060129	1	1	1	1	1	101023	105954	92728	1	1	1	141959	138548	142620	854721	810996	865809	1997852	2039438	2072763	1	1	1	2145258	1823149	2135874	1212569	1154204	1244000	90765	1	97941	137509	128176	129702	131439	113483	1	150491	1	143168	60042	54234	65830	1
DG(18:3(9Z,12Z,15Z)/22:2(13Z,16Z)/0:0)	1664824	1640398	1599593	3060129	1	1	1	1	1	101023	105954	92728	1	1	1	141959	138548	142620	854721	810996	865809	1997852	2039438	2072763	1	1	1	2145258	1823149	2135874	1212569	1154204	1244000	90765	1	97941	137509	128176	129702	131439	113483	1	150491	1	143168	60042	54234	65830	1
DG(22:1(13Z)/18:4(6Z,9Z,12Z,15Z)/0:0)	1664824	1640398	1599593	3060129	1	1	1	1	1	101023	105954	92728	1	1	1	141959	138548	142620	854721	810996	865809	1997852	2039438	2072763	1	1	1	2145258	1823149	2135874	1212569	1154204	1244000	90765	1	97941	137509	128176	129702	131439	113483	1	150491	1	143168	60042	54234	65830	1
DG(18:0/22:5(7Z,10Z,13Z,16Z,19Z)/0:0)	1664824	1640398	1599593	3060129	1	1	1	1	1	101023	105954	92728	1	1	1	141959	138548	142620	854721	810996	865809	1997852	2039438	2072763	1	1	1	2145258	1823149	2135874	1212569	1154204	1244000	90765	1	97941	137509	128176	129702	131439	113483	1	150491	1	143168	60042	54234	65830	1
DG(18:1n7/0:0/22:4n6)	1664824	1640398	1599593	3060129	1	1	1	1	1	101023	105954	92728	1	1	1	141959	138548	142620	854721	810996	865809	1997852	2039438	2072763	1	1	1	2145258	1823149	2135874	1212569	1154204	1244000	90765	1	97941	137509	128176	129702	131439	113483	1	150491	1	143168	60042	54234	65830	1
DG(22:5(7Z,10Z,13Z,16Z,19Z)/18:0/0:0)	1664824	1640398	1599593	3060129	1	1	1	1	1	101023	105954	92728	1	1	1	141959	138548	142620	854721	810996	865809	1997852	2039438	2072763	1	1	1	2145258	1823149	2135874	1212569	1154204	1244000	90765	1	97941	137509	128176	129702	131439	113483	1	150491	1	143168	60042	54234	65830	1
DG(18:4(6Z,9Z,12Z,15Z)/22:1(13Z)/0:0)	1664824	1640398	1599593	3060129	1	1	1	1	1	101023	105954	92728	1	1	1	141959	138548	142620	854721	810996	865809	1997852	2039438	2072763	1	1	1	2145258	1823149	2135874	1212569	1154204	1244000	90765	1	97941	137509	128176	129702	131439	113483	1	150491	1	143168	60042	54234	65830	1
DG(20:0/0:0/20:5n3)	1664824	1640398	1599593	3060129	1	1	1	1	1	101023	105954	92728	1	1	1	141959	138548	142620	854721	810996	865809	1997852	2039438	2072763	1	1	1	2145258	1823149	2135874	1212569	1154204	1244000	90765	1	97941	137509	128176	129702	131439	113483	1	150491	1	143168	60042	54234	65830	1
DG(20:0/20:5(5Z,8Z,11Z,14Z,17Z)/0:0)	1664824	1640398	1599593	3060129	1	1	1	1	1	101023	105954	92728	1	1	1	141959	138548	142620	854721	810996	865809	1997852	2039438	2072763	1	1	1	2145258	1823149	2135874	1212569	1154204	1244000	90765	1	97941	137509	128176	129702	131439	113483	1	150491	1	143168	60042	54234	65830	1
DG(18:1(11Z)/22:4(7Z,10Z,13Z,16Z)/0:0)	1664824	1640398	1599593	3060129	1	1	1	1	1	101023	105954	92728	1	1	1	141959	138548	142620	854721	810996	865809	1997852	2039438	2072763	1	1	1	2145258	1823149	2135874	1212569	1154204	1244000	90765	1	97941	137509	128176	129702	131439	113483	1	150491	1	143168	60042	54234	65830	1
DG(20:1(11Z)/20:4(5Z,8Z,11Z,14Z)/0:0)	1664824	1640398	1599593	3060129	1	1	1	1	1	101023	105954	92728	1	1	1	141959	138548	142620	854721	810996	865809	1997852	2039438	2072763	1	1	1	2145258	1823149	2135874	1212569	1154204	1244000	90765	1	97941	137509	128176	129702	131439	113483	1	150491	1	143168	60042	54234	65830	1
DG(22:5(4Z,7Z,10Z,13Z,16Z)/18:0/0:0)	1664824	1640398	1599593	3060129	1	1	1	1	1	101023	105954	92728	1	1	1	141959	138548	142620	854721	810996	865809	1997852	2039438	2072763	1	1	1	2145258	1823149	2135874	1212569	1154204	1244000	90765	1	97941	137509	128176	129702	131439	113483	1	150491	1	143168	60042	54234	65830	1
DG(20:2(11Z,14Z)/20:3(8Z,11Z,14Z)/0:0)	1664824	1640398	1599593	3060129	1	1	1	1	1	101023	105954	92728	1	1	1	141959	138548	142620	854721	810996	865809	1997852	2039438	2072763	1	1	1	2145258	1823149	2135874	1212569	1154204	1244000	90765	1	97941	137509	128176	129702	131439	113483	1	150491	1	143168	60042	54234	65830	1
DG(20:2(11Z,14Z)/20:3(5Z,8Z,11Z)/0:0)	1664824	1640398	1599593	3060129	1	1	1	1	1	101023	105954	92728	1	1	1	141959	138548	142620	854721	810996	865809	1997852	2039438	2072763	1	1	1	2145258	1823149	2135874	1212569	1154204	1244000	90765	1	97941	137509	128176	129702	131439	113483	1	150491	1	143168	60042	54234	65830	1
DG(20:4(8Z,11Z,14Z,17Z)/20:1(11Z)/0:0)	1664824	1640398	1599593	3060129	1	1	1	1	1	101023	105954	92728	1	1	1	141959	138548	142620	854721	810996	865809	1997852	2039438	2072763	1	1	1	2145258	1823149	2135874	1212569	1154204	1244000	90765	1	97941	137509	128176	129702	131439	113483	1	150491	1	143168	60042	54234	65830	1
DG(22:4(7Z,10Z,13Z,16Z)/18:1(11Z)/0:0)	1664824	1640398	1599593	3060129	1	1	1	1	1	101023	105954	92728	1	1	1	141959	138548	142620	854721	810996	865809	1997852	2039438	2072763	1	1	1	2145258	1823149	2135874	1212569	1154204	1244000	90765	1	97941	137509	128176	129702	131439	113483	1	150491	1	143168	60042	54234	65830	1
DG(18:0/0:0/22:5n6)	1664824	1640398	1599593	3060129	1	1	1	1	1	101023	105954	92728	1	1	1	141959	138548	142620	854721	810996	865809	1997852	2039438	2072763	1	1	1	2145258	1823149	2135874	1212569	1154204	1244000	90765	1	97941	137509	128176	129702	131439	113483	1	150491	1	143168	60042	54234	65830	1
DG(18:1n9/0:0/22:4n6)	1664824	1640398	1599593	3060129	1	1	1	1	1	101023	105954	92728	1	1	1	141959	138548	142620	854721	810996	865809	1997852	2039438	2072763	1	1	1	2145258	1823149	2135874	1212569	1154204	1244000	90765	1	97941	137509	128176	129702	131439	113483	1	150491	1	143168	60042	54234	65830	1
DG(18:0/0:0/22:5n3)	1664824	1640398	1599593	3060129	1	1	1	1	1	101023	105954	92728	1	1	1	141959	138548	142620	854721	810996	865809	1997852	2039438	2072763	1	1	1	2145258	1823149	2135874	1212569	1154204	1244000	90765	1	97941	137509	128176	129702	131439	113483	1	150491	1	143168	60042	54234	65830	1
DG(22:4(7Z,10Z,13Z,16Z)/18:1(9Z)/0:0)	1664824	1640398	1599593	3060129	1	1	1	1	1	101023	105954	92728	1	1	1	141959	138548	142620	854721	810996	865809	1997852	2039438	2072763	1	1	1	2145258	1823149	2135874	1212569	1154204	1244000	90765	1	97941	137509	128176	129702	131439	113483	1	150491	1	143168	60042	54234	65830	1
DG(22:2(13Z,16Z)/18:3(6Z,9Z,12Z)/0:0)	1664824	1640398	1599593	3060129	1	1	1	1	1	101023	105954	92728	1	1	1	141959	138548	142620	854721	810996	865809	1997852	2039438	2072763	1	1	1	2145258	1823149	2135874	1212569	1154204	1244000	90765	1	97941	137509	128176	129702	131439	113483	1	150491	1	143168	60042	54234	65830	1
DG(20:3(8Z,11Z,14Z)/20:2(11Z,14Z)/0:0)	1664824	1640398	1599593	3060129	1	1	1	1	1	101023	105954	92728	1	1	1	141959	138548	142620	854721	810996	865809	1997852	2039438	2072763	1	1	1	2145258	1823149	2135874	1212569	1154204	1244000	90765	1	97941	137509	128176	129702	131439	113483	1	150491	1	143168	60042	54234	65830	1
PA(16:0/18:2(9Z,12Z))	1	1	1	1	1	1	387149	386804	403419	299746	303733	293259	1	1	1	513863	501153	531590	1	1	1	1	1	1	415151	422414	405929	1	1	1	1	1	1	1	1	1	1	1	1	368973	370118	362384	188012	189000	188192	351139	376622	395706	1
DG(20:2n6/0:0/20:2n6)	1353816	1321832	1239275	4382746	4678122	4437472	5216331	6195353	6733278	4597291	1778507	903779	2027772	1603580	2097794	1495132	1573235	1634055	1435355	1410258	1482134	4311593	4391313	4478826	1083043	5726364	1189208	3489406	3152158	3428429	1430066	1	1563481	3879714	4206344	4164448	3840412	3792883	3594297	5734978	5316535	1	5961237	6581156	6221550	948854	966448	861996	2456766
CerP(d18:1/20:0)	1	1	1	1	1	1	1	1	1	1	1	1	1	1	1	1	1	1	1	1	1	1	1	1	1	1	1	1	1	1	1	1	1	1	1	1	1	1	1	1	1	1	1	1	1	1	1	1	1
DG(22:0/18:4(6Z,9Z,12Z,15Z)/0:0)	1353816	1321832	1239275	4382746	4678122	4437472	5216331	6195353	6733278	4597291	1778507	1	2027772	1603580	2097794	1	1	1	1435355	1410258	1482134	4311593	4391313	4478826	1	5726364	1	3489406	3152158	3428429	1430066	1	1563481	3879714	4206344	4164448	3840412	3792883	3594297	5734978	5316535	1	5961237	6581156	6221550	1	1	1	2456766
DG(18:0/22:4(7Z,10Z,13Z,16Z)/0:0)	1353816	1321832	1239275	4382746	4678122	4437472	5216331	6195353	6733278	4597291	1778507	1	2027772	1603580	2097794	1	1	1	1435355	1410258	1482134	4311593	4391313	4478826	1	5726364	1	3489406	3152158	3428429	1430066	1	1563481	3879714	4206344	4164448	3840412	3792883	3594297	5734978	5316535	1	5961237	6581156	6221550	1	1	1	2456766
DG(20:4(8Z,11Z,14Z,17Z)/20:0/0:0)	1353816	1321832	1239275	4382746	4678122	4437472	5216331	6195353	6733278	4597291	1778507	1	2027772	1603580	2097794	1	1	1	1435355	1410258	1482134	4311593	4391313	4478826	1	5726364	1	3489406	3152158	3428429	1430066	1	1563481	3879714	4206344	4164448	3840412	3792883	3594297	5734978	5316535	1	5961237	6581156	6221550	1	1	1	2456766
DG(22:1n9/0:0/18:3n6)	1353816	1321832	1239275	4382746	4678122	4437472	5216331	6195353	6733278	4597291	1778507	1	2027772	1603580	2097794	1	1	1	1435355	1410258	1482134	4311593	4391313	4478826	1	5726364	1	3489406	3152158	3428429	1430066	1	1563481	3879714	4206344	4164448	3840412	3792883	3594297	5734978	5316535	1	5961237	6581156	6221550	1	1	1	2456766
DG(22:1n9/0:0/18:3n3)	1353816	1321832	1239275	4382746	4678122	4437472	5216331	6195353	6733278	4597291	1778507	1	2027772	1603580	2097794	1	1	1	1435355	1410258	1482134	4311593	4391313	4478826	1	5726364	1	3489406	3152158	3428429	1430066	1	1563481	3879714	4206344	4164448	3840412	3792883	3594297	5734978	5316535	1	5961237	6581156	6221550	1	1	1	2456766
DG(20:2(11Z,14Z)/20:2(11Z,14Z)/0:0)	1353816	1321832	1239275	4382746	4678122	4437472	5216331	6195353	6733278	4597291	1778507	1	2027772	1603580	2097794	1	1	1	1435355	1410258	1482134	4311593	4391313	4478826	1	5726364	1	3489406	3152158	3428429	1430066	1	1563481	3879714	4206344	4164448	3840412	3792883	3594297	5734978	5316535	1	5961237	6581156	6221550	1	1	1	2456766
DG(22:2(13Z,16Z)/18:2(9Z,12Z)/0:0)	1353816	1321832	1239275	4382746	4678122	4437472	5216331	6195353	6733278	4597291	1778507	1	2027772	1603580	2097794	1	1	1	1435355	1410258	1482134	4311593	4391313	4478826	1	5726364	1	3489406	3152158	3428429	1430066	1	1563481	3879714	4206344	4164448	3840412	3792883	3594297	5734978	5316535	1	5961237	6581156	6221550	1	1	1	2456766
DG(18:0/0:0/22:4n6)	1353816	1321832	1239275	4382746	4678122	4437472	5216331	6195353	6733278	4597291	1778507	1	2027772	1603580	2097794	1	1	1	1435355	1410258	1482134	4311593	4391313	4478826	1	5726364	1	3489406	3152158	3428429	1430066	1	1563481	3879714	4206344	4164448	3840412	3792883	3594297	5734978	5316535	1	5961237	6581156	6221550	1	1	1	2456766
DG(22:1(13Z)/18:3(6Z,9Z,12Z)/0:0)	1353816	1321832	1239275	4382746	4678122	4437472	5216331	6195353	6733278	4597291	1778507	1	2027772	1603580	2097794	1	1	1	1435355	1410258	1482134	4311593	4391313	4478826	1	5726364	1	3489406	3152158	3428429	1430066	1	1563481	3879714	4206344	4164448	3840412	3792883	3594297	5734978	5316535	1	5961237	6581156	6221550	1	1	1	2456766
DG(18:1(11Z)/20:3(5Z,8Z,11Z)/0:0)	1353816	1321832	1239275	4382746	4678122	4437472	5216331	6195353	6733278	4597291	1778507	1	2027772	1603580	2097794	1	1	1	1435355	1410258	1482134	4311593	4391313	4478826	1	5726364	1	3489406	3152158	3428429	1430066	1	1563481	3879714	4206344	4164448	3840412	3792883	3594297	5734978	5316535	1	5961237	6581156	6221550	1	1	1	2456766
DG(20:4(5Z,8Z,11Z,14Z)/20:0/0:0)	1353816	1321832	1239275	4382746	4678122	4437472	5216331	6195353	6733278	4597291	1778507	1	2027772	1603580	2097794	1	1	1	1435355	1410258	1482134	4311593	4391313	4478826	1	5726364	1	3489406	3152158	3428429	1430066	1	1563481	3879714	4206344	4164448	3840412	3792883	3594297	5734978	5316535	1	5961237	6581156	6221550	1	1	1	2456766
DG(18:3(6Z,9Z,12Z)/22:1(13Z)/0:0)	1353816	1321832	1239275	4382746	4678122	4437472	5216331	6195353	6733278	4597291	1778507	1	2027772	1603580	2097794	1	1	1	1435355	1410258	1482134	4311593	4391313	4478826	1	5726364	1	3489406	3152158	3428429	1430066	1	1563481	3879714	4206344	4164448	3840412	3792883	3594297	5734978	5316535	1	5961237	6581156	6221550	1	1	1	2456766
DG(22:4(7Z,10Z,13Z,16Z)/18:0/0:0)	1353816	1321832	1239275	4382746	4678122	4437472	5216331	6195353	6733278	4597291	1778507	1	2027772	1603580	2097794	1	1	1	1435355	1410258	1482134	4311593	4391313	4478826	1	5726364	1	3489406	3152158	3428429	1430066	1	1563481	3879714	4206344	4164448	3840412	3792883	3594297	5734978	5316535	1	5961237	6581156	6221550	1	1	1	2456766
DG(18:4(6Z,9Z,12Z,15Z)/22:0/0:0)	1353816	1321832	1239275	4382746	4678122	4437472	5216331	6195353	6733278	4597291	1778507	1	2027772	1603580	2097794	1	1	1	1435355	1410258	1482134	4311593	4391313	4478826	1	5726364	1	3489406	3152158	3428429	1430066	1	1563481	3879714	4206344	4164448	3840412	3792883	3594297	5734978	5316535	1	5961237	6581156	6221550	1	1	1	2456766
DG(18:3(9Z,12Z,15Z)/22:1(13Z)/0:0)	1353816	1321832	1239275	4382746	4678122	4437472	5216331	6195353	6733278	4597291	1778507	1	2027772	1603580	2097794	1	1	1	1435355	1410258	1482134	4311593	4391313	4478826	1	5726364	1	3489406	3152158	3428429	1430066	1	1563481	3879714	4206344	4164448	3840412	3792883	3594297	5734978	5316535	1	5961237	6581156	6221550	1	1	1	2456766
DG(22:1(13Z)/18:3(9Z,12Z,15Z)/0:0)	1353816	1321832	1239275	4382746	4678122	4437472	5216331	6195353	6733278	4597291	1778507	1	2027772	1603580	2097794	1	1	1	1435355	1410258	1482134	4311593	4391313	4478826	1	5726364	1	3489406	3152158	3428429	1430066	1	1563481	3879714	4206344	4164448	3840412	3792883	3594297	5734978	5316535	1	5961237	6581156	6221550	1	1	1	2456766
DG(20:0/20:4(5Z,8Z,11Z,14Z)/0:0)	1353816	1321832	1239275	4382746	4678122	4437472	5216331	6195353	6733278	4597291	1778507	1	2027772	1603580	2097794	1	1	1	1435355	1410258	1482134	4311593	4391313	4478826	1	5726364	1	3489406	3152158	3428429	1430066	1	1563481	3879714	4206344	4164448	3840412	3792883	3594297	5734978	5316535	1	5961237	6581156	6221550	1	1	1	2456766
DG(20:1(11Z)/20:3(5Z,8Z,11Z)/0:0)	1353816	1321832	1239275	4382746	4678122	4437472	5216331	6195353	6733278	4597291	1778507	1	2027772	1603580	2097794	1	1	1	1435355	1410258	1482134	4311593	4391313	4478826	1	5726364	1	3489406	3152158	3428429	1430066	1	1563481	3879714	4206344	4164448	3840412	3792883	3594297	5734978	5316535	1	5961237	6581156	6221550	1	1	1	2456766
DG(20:1(11Z)/20:3(8Z,11Z,14Z)/0:0)	1353816	1321832	1239275	4382746	4678122	4437472	5216331	6195353	6733278	4597291	1778507	1	2027772	1603580	2097794	1	1	1	1435355	1410258	1482134	4311593	4391313	4478826	1	5726364	1	3489406	3152158	3428429	1430066	1	1563481	3879714	4206344	4164448	3840412	3792883	3594297	5734978	5316535	1	5961237	6581156	6221550	1	1	1	2456766
DG(20:1n9/0:0/20:3n9)	1353816	1321832	1239275	4382746	4678122	4437472	5216331	6195353	6733278	4597291	1778507	1	2027772	1603580	2097794	1	1	1	1435355	1410258	1482134	4311593	4391313	4478826	1	5726364	1	3489406	3152158	3428429	1430066	1	1563481	3879714	4206344	4164448	3840412	3792883	3594297	5734978	5316535	1	5961237	6581156	6221550	1	1	1	2456766
DG(20:1n9/0:0/20:3n6)	1353816	1321832	1239275	4382746	4678122	4437472	5216331	6195353	6733278	4597291	1778507	1	2027772	1603580	2097794	1	1	1	1435355	1410258	1482134	4311593	4391313	4478826	1	5726364	1	3489406	3152158	3428429	1430066	1	1563481	3879714	4206344	4164448	3840412	3792883	3594297	5734978	5316535	1	5961237	6581156	6221550	1	1	1	2456766
DG(20:0/0:0/20:4n3)	1353816	1321832	1239275	4382746	4678122	4437472	5216331	6195353	6733278	4597291	1778507	1	2027772	1603580	2097794	1	1	1	1435355	1410258	1482134	4311593	4391313	4478826	1	5726364	1	3489406	3152158	3428429	1430066	1	1563481	3879714	4206344	4164448	3840412	3792883	3594297	5734978	5316535	1	5961237	6581156	6221550	1	1	1	2456766
DG(18:2(9Z,12Z)/22:2(13Z,16Z)/0:0)	1353816	1321832	1239275	4382746	4678122	4437472	5216331	6195353	6733278	4597291	1778507	1	2027772	1603580	2097794	1	1	1	1435355	1410258	1482134	4311593	4391313	4478826	1	5726364	1	3489406	3152158	3428429	1430066	1	1563481	3879714	4206344	4164448	3840412	3792883	3594297	5734978	5316535	1	5961237	6581156	6221550	1	1	1	2456766
DG(22:0/0:0/18:4n3)	1353816	1321832	1239275	4382746	4678122	4437472	5216331	6195353	6733278	4597291	1778507	1	2027772	1603580	2097794	1	1	1	1435355	1410258	1482134	4311593	4391313	4478826	1	5726364	1	3489406	3152158	3428429	1430066	1	1563481	3879714	4206344	4164448	3840412	3792883	3594297	5734978	5316535	1	5961237	6581156	6221550	1	1	1	2456766
DG(20:0/0:0/20:4n6)	1353816	1321832	1239275	4382746	4678122	4437472	5216331	6195353	6733278	4597291	1778507	1	2027772	1603580	2097794	1	1	1	1435355	1410258	1482134	4311593	4391313	4478826	1	5726364	1	3489406	3152158	3428429	1430066	1	1563481	3879714	4206344	4164448	3840412	3792883	3594297	5734978	5316535	1	5961237	6581156	6221550	1	1	1	2456766
DG(20:0/20:4(8Z,11Z,14Z,17Z)/0:0)	1353816	1321832	1239275	4382746	4678122	4437472	5216331	6195353	6733278	4597291	1778507	1	2027772	1603580	2097794	1	1	1	1435355	1410258	1482134	4311593	4391313	4478826	1	5726364	1	3489406	3152158	3428429	1430066	1	1563481	3879714	4206344	4164448	3840412	3792883	3594297	5734978	5316535	1	5961237	6581156	6221550	1	1	1	2456766
DG(20:3(8Z,11Z,14Z)/20:1(11Z)/0:0)	1353816	1321832	1239275	4382746	4678122	4437472	5216331	6195353	6733278	4597291	1778507	1	2027772	1603580	2097794	1	1	1	1435355	1410258	1482134	4311593	4391313	4478826	1	5726364	1	3489406	3152158	3428429	1430066	1	1563481	3879714	4206344	4164448	3840412	3792883	3594297	5734978	5316535	1	5961237	6581156	6221550	1	1	1	2456766
DG(20:3(5Z,8Z,11Z)/20:1(11Z)/0:0)	1353816	1321832	1239275	4382746	4678122	4437472	5216331	6195353	6733278	4597291	1778507	1	2027772	1603580	2097794	1	1	1	1435355	1410258	1482134	4311593	4391313	4478826	1	5726364	1	3489406	3152158	3428429	1430066	1	1563481	3879714	4206344	4164448	3840412	3792883	3594297	5734978	5316535	1	5961237	6581156	6221550	1	1	1	2456766
DG(16:0/22:1(13Z)/0:0)	1400744	1397360	1350553	4635725	4858200	4870342	7265796	7383031	7500676	6613884	6514273	6396057	2532690	2528124	2608049	7970981	8075351	8249265	1500338	1487911	1532734	4364648	4425120	4533421	6404716	6448823	6529725	3703545	3412611	3692976	1574947	1573959	1631858	4245247	4305607	4311002	3992298	4100354	4139203	6634191	6246743	6603116	6796385	6842720	6921596	5008615	4993000	4788515	2734948
DG(24:0/14:1(9Z)/0:0)	1400744	1397360	1350553	4635725	4858200	4870342	7265796	7383031	7500676	6613884	6514273	6396057	2532690	2528124	2608049	7970981	8075351	8249265	1500338	1487911	1532734	4364648	4425120	4533421	6404716	6448823	6529725	3703545	3412611	3692976	1574947	1573959	1631858	4245247	4305607	4311002	3992298	4100354	4139203	6634191	6246743	6603116	6796385	6842720	6921596	5008615	4993000	4788515	2734948
DG(14:0/0:0/24:1n9)	1400744	1397360	1350553	4635725	4858200	4870342	7265796	7383031	7500676	6613884	6514273	6396057	2532690	2528124	2608049	7970981	8075351	8249265	1500338	1487911	1532734	4364648	4425120	4533421	6404716	6448823	6529725	3703545	3412611	3692976	1574947	1573959	1631858	4245247	4305607	4311002	3992298	4100354	4139203	6634191	6246743	6603116	6796385	6842720	6921596	5008615	4993000	4788515	2734948
DG(18:1(11Z)/20:0/0:0)	1400744	1397360	1350553	4635725	4858200	4870342	7265796	7383031	7500676	6613884	6514273	6396057	2532690	2528124	2608049	7970981	8075351	8249265	1500338	1487911	1532734	4364648	4425120	4533421	6404716	6448823	6529725	3703545	3412611	3692976	1574947	1573959	1631858	4245247	4305607	4311002	3992298	4100354	4139203	6634191	6246743	6603116	6796385	6842720	6921596	5008615	4993000	4788515	2734948
DG(22:1(13Z)/16:0/0:0)	1400744	1397360	1350553	4635725	4858200	4870342	7265796	7383031	7500676	6613884	6514273	6396057	2532690	2528124	2608049	7970981	8075351	8249265	1500338	1487911	1532734	4364648	4425120	4533421	6404716	6448823	6529725	3703545	3412611	3692976	1574947	1573959	1631858	4245247	4305607	4311002	3992298	4100354	4139203	6634191	6246743	6603116	6796385	6842720	6921596	5008615	4993000	4788515	2734948
DG(18:0/0:0/20:1n9)	1400744	1397360	1350553	4635725	4858200	4870342	7265796	7383031	7500676	6613884	6514273	6396057	2532690	2528124	2608049	7970981	8075351	8249265	1500338	1487911	1532734	4364648	4425120	4533421	6404716	6448823	6529725	3703545	3412611	3692976	1574947	1573959	1631858	4245247	4305607	4311002	3992298	4100354	4139203	6634191	6246743	6603116	6796385	6842720	6921596	5008615	4993000	4788515	2734948
DG(22:0/16:1(9Z)/0:0)	1400744	1397360	1350553	4635725	4858200	4870342	7265796	7383031	7500676	6613884	6514273	6396057	2532690	2528124	2608049	7970981	8075351	8249265	1500338	1487911	1532734	4364648	4425120	4533421	6404716	6448823	6529725	3703545	3412611	3692976	1574947	1573959	1631858	4245247	4305607	4311002	3992298	4100354	4139203	6634191	6246743	6603116	6796385	6842720	6921596	5008615	4993000	4788515	2734948
DG(16:0/0:0/22:1n9)	1400744	1397360	1350553	4635725	4858200	4870342	7265796	7383031	7500676	6613884	6514273	6396057	2532690	2528124	2608049	7970981	8075351	8249265	1500338	1487911	1532734	4364648	4425120	4533421	6404716	6448823	6529725	3703545	3412611	3692976	1574947	1573959	1631858	4245247	4305607	4311002	3992298	4100354	4139203	6634191	6246743	6603116	6796385	6842720	6921596	5008615	4993000	4788515	2734948
DG(18:1(9Z)/20:0/0:0)	1400744	1397360	1350553	4635725	4858200	4870342	7265796	7383031	7500676	6613884	6514273	6396057	2532690	2528124	2608049	7970981	8075351	8249265	1500338	1487911	1532734	4364648	4425120	4533421	6404716	6448823	6529725	3703545	3412611	3692976	1574947	1573959	1631858	4245247	4305607	4311002	3992298	4100354	4139203	6634191	6246743	6603116	6796385	6842720	6921596	5008615	4993000	4788515	2734948
DG(20:1(11Z)/18:0/0:0)	1400744	1397360	1350553	4635725	4858200	4870342	7265796	7383031	7500676	6613884	6514273	6396057	2532690	2528124	2608049	7970981	8075351	8249265	1500338	1487911	1532734	4364648	4425120	4533421	6404716	6448823	6529725	3703545	3412611	3692976	1574947	1573959	1631858	4245247	4305607	4311002	3992298	4100354	4139203	6634191	6246743	6603116	6796385	6842720	6921596	5008615	4993000	4788515	2734948
DG(18:0/20:1(11Z)/0:0)	1400744	1397360	1350553	4635725	4858200	4870342	7265796	7383031	7500676	6613884	6514273	6396057	2532690	2528124	2608049	7970981	8075351	8249265	1500338	1487911	1532734	4364648	4425120	4533421	6404716	6448823	6529725	3703545	3412611	3692976	1574947	1573959	1631858	4245247	4305607	4311002	3992298	4100354	4139203	6634191	6246743	6603116	6796385	6842720	6921596	5008615	4993000	4788515	2734948
DG(20:0/0:0/18:1n7)	1400744	1397360	1350553	4635725	4858200	4870342	7265796	7383031	7500676	6613884	6514273	6396057	2532690	2528124	2608049	7970981	8075351	8249265	1500338	1487911	1532734	4364648	4425120	4533421	6404716	6448823	6529725	3703545	3412611	3692976	1574947	1573959	1631858	4245247	4305607	4311002	3992298	4100354	4139203	6634191	6246743	6603116	6796385	6842720	6921596	5008615	4993000	4788515	2734948
DG(20:0/0:0/18:1n9)	1400744	1397360	1350553	4635725	4858200	4870342	7265796	7383031	7500676	6613884	6514273	6396057	2532690	2528124	2608049	7970981	8075351	8249265	1500338	1487911	1532734	4364648	4425120	4533421	6404716	6448823	6529725	3703545	3412611	3692976	1574947	1573959	1631858	4245247	4305607	4311002	3992298	4100354	4139203	6634191	6246743	6603116	6796385	6842720	6921596	5008615	4993000	4788515	2734948
DG(22:0/0:0/16:1n7)	1400744	1397360	1350553	4635725	4858200	4870342	7265796	7383031	7500676	6613884	6514273	6396057	2532690	2528124	2608049	7970981	8075351	8249265	1500338	1487911	1532734	4364648	4425120	4533421	6404716	6448823	6529725	3703545	3412611	3692976	1574947	1573959	1631858	4245247	4305607	4311002	3992298	4100354	4139203	6634191	6246743	6603116	6796385	6842720	6921596	5008615	4993000	4788515	2734948
DG(24:1(15Z)/14:0/0:0)	1400744	1397360	1350553	4635725	4858200	4870342	7265796	7383031	7500676	6613884	6514273	6396057	2532690	2528124	2608049	7970981	8075351	8249265	1500338	1487911	1532734	4364648	4425120	4533421	6404716	6448823	6529725	3703545	3412611	3692976	1574947	1573959	1631858	4245247	4305607	4311002	3992298	4100354	4139203	6634191	6246743	6603116	6796385	6842720	6921596	5008615	4993000	4788515	2734948
DG(20:0/18:1(9Z)/0:0)	1400744	1397360	1350553	4635725	4858200	4870342	7265796	7383031	7500676	6613884	6514273	6396057	2532690	2528124	2608049	7970981	8075351	8249265	1500338	1487911	1532734	4364648	4425120	4533421	6404716	6448823	6529725	3703545	3412611	3692976	1574947	1573959	1631858	4245247	4305607	4311002	3992298	4100354	4139203	6634191	6246743	6603116	6796385	6842720	6921596	5008615	4993000	4788515	2734948
DG(14:0/24:1(15Z)/0:0)	1400744	1397360	1350553	4635725	4858200	4870342	7265796	7383031	7500676	6613884	6514273	6396057	2532690	2528124	2608049	7970981	8075351	8249265	1500338	1487911	1532734	4364648	4425120	4533421	6404716	6448823	6529725	3703545	3412611	3692976	1574947	1573959	1631858	4245247	4305607	4311002	3992298	4100354	4139203	6634191	6246743	6603116	6796385	6842720	6921596	5008615	4993000	4788515	2734948
DG(14:1(9Z)/24:0/0:0)	1400744	1397360	1350553	4635725	4858200	4870342	7265796	7383031	7500676	6613884	6514273	6396057	2532690	2528124	2608049	7970981	8075351	8249265	1500338	1487911	1532734	4364648	4425120	4533421	6404716	6448823	6529725	3703545	3412611	3692976	1574947	1573959	1631858	4245247	4305607	4311002	3992298	4100354	4139203	6634191	6246743	6603116	6796385	6842720	6921596	5008615	4993000	4788515	2734948
DG(16:1(9Z)/22:0/0:0)	1400744	1397360	1350553	4635725	4858200	4870342	7265796	7383031	7500676	6613884	6514273	6396057	2532690	2528124	2608049	7970981	8075351	8249265	1500338	1487911	1532734	4364648	4425120	4533421	6404716	6448823	6529725	3703545	3412611	3692976	1574947	1573959	1631858	4245247	4305607	4311002	3992298	4100354	4139203	6634191	6246743	6603116	6796385	6842720	6921596	5008615	4993000	4788515	2734948
DG(20:0/18:1(11Z)/0:0)	1400744	1397360	1350553	4635725	4858200	4870342	7265796	7383031	7500676	6613884	6514273	6396057	2532690	2528124	2608049	7970981	8075351	8249265	1500338	1487911	1532734	4364648	4425120	4533421	6404716	6448823	6529725	3703545	3412611	3692976	1574947	1573959	1631858	4245247	4305607	4311002	3992298	4100354	4139203	6634191	6246743	6603116	6796385	6842720	6921596	5008615	4993000	4788515	2734948
DG(24:0/0:0/14:1n5)	1400744	1397360	1350553	4635725	4858200	4870342	7265796	7383031	7500676	6613884	6514273	6396057	2532690	2528124	2608049	7970981	8075351	8249265	1500338	1487911	1532734	4364648	4425120	4533421	6404716	6448823	6529725	3703545	3412611	3692976	1574947	1573959	1631858	4245247	4305607	4311002	3992298	4100354	4139203	6634191	6246743	6603116	6796385	6842720	6921596	5008615	4993000	4788515	2734948
PA(16:0/18:1(11Z))	180914	167757	1	442759	464099	441638	1	1367278	1	1550605	1561830	1520728	337612	316987	340232	1386874	1314957	1	1	1	1	284391	288347	295699	1	1	1	319127	318926	332858	1	1	1	505150	552275	533263	495953	498143	499827	1546548	1	1	1	1	1	1	1	1	1
PA(P-16:0e/18:2(9Z,12Z))	180914	167757	1	442759	464099	441638	1379953	1367278	1	1550605	1561830	1520728	337612	316987	340232	1375656	1314957	1354600	1	1	1	284391	288347	295699	1	1	1	319127	318926	332858	1	1	1	505150	552275	533263	495953	498143	499827	1546548	1	1	1	1	1	1	1	1	348817
CE(MonoMe(9,5))	1	1	1	203190	201958	221442	391209	603224	417950	337019	736574	2399698	1	1	1	443012	393687	496821	1	1	1	1	1	1	352676	390117	347342	1	1	1	1	1	1	184033	183562	187871	178641	188285	193626	384023	398990	374633	456530	344581	388131	258965	376339	292571	1
CE(MonoMe(11,3))	1	1	1	203190	201958	221442	391209	603224	417950	337019	736574	2399698	1	1	1	443012	393687	496821	1	1	1	1	1	1	352676	390117	347342	1	1	1	1	1	1	184033	183562	187871	178641	188285	193626	384023	398990	374633	456530	344581	388131	258965	376339	292571	1
DG(15:0/22:1(13Z)/0:0)	139862	145882	1	451172	482312	491488	1025174	1038432	1039883	1575878	1628704	1592611	271703	272381	280979	1816621	1777968	1842418	1	1	1	319082	335855	338044	1120972	1137468	1147666	273101	236729	271066	1	1	1	473018	479885	482918	592851	638115	639254	1651964	1504119	1603153	991020	978453	1022519	979735	995143	924045	223655
DG(15:0/0:0/22:1n9)	139862	145882	1	451172	482312	491488	1025174	1038432	1039883	1575878	1628704	1592611	271703	272381	280979	1816621	1777968	1842418	1	1	1	319082	335855	338044	1120972	1137468	1147666	273101	236729	271066	1	1	1	473018	479885	482918	592851	638115	639254	1651964	1504119	1603153	991020	978453	1022519	979735	995143	924045	223655
DG(22:1(13Z)/15:0/0:0)	139862	145882	1	451172	482312	491488	1025174	1038432	1039883	1575878	1628704	1592611	271703	272381	280979	1816621	1777968	1842418	1	1	1	319082	335855	338044	1120972	1137468	1147666	273101	236729	271066	1	1	1	473018	479885	482918	592851	638115	639254	1651964	1504119	1603153	991020	978453	1022519	979735	995143	924045	223655
DG(18:2n6/0:0/22:6n3)	975433	1	922933	2217140	2202639	2226804	2238083	2259301	2291333	2084916	2122729	2076546	1402033	1373280	1404168	2845466	2779027	2829500	1230492	1212589	1	123715	1	125930	1930025	1943973	1972275	1995782	2040644	2112757	1200119	1226211	1233046	1917477	1948050	1969718	1985753	1939236	1933145	2157506	2104085	2133933	2539979	2520352	2641071	726274	741094	797206	1689726
DG(20:5n3/0:0/20:5n3)	1	1	1	1	1	1	1	1	1	1	1	1	1	1	1	1	1	1	1	1	1	1	1	1	1	1	1	1	1	1	1	1	1	1	1	1	1	1	1	1	1	1	1	1	1	1	1	1	1
DG(20:5(5Z,8Z,11Z,14Z,17Z)/20:5(5Z,8Z,11Z,14Z,17Z)/0:0)	1	1	1	1	1	1	1	1	1	1	1	1	1	1	1	1	1	1	1	1	1	1	1	1	1	1	1	1	1	1	1	1	1	1	1	1	1	1	1	1	1	1	1	1	1	1	1	1	1
DG(18:4(6Z,9Z,12Z,15Z)/22:6(4Z,7Z,10Z,13Z,16Z,19Z)/0:0)	1	1	1	1	1	1	1	1	1	1	1	1	1	1	1	1	1	1	1	1	1	1	1	1	1	1	1	1	1	1	1	1	1	1	1	1	1	1	1	1	1	1	1	1	1	1	1	1	1
DG(22:6(4Z,7Z,10Z,13Z,16Z,19Z)/18:4(6Z,9Z,12Z,15Z)/0:0)	1	1	1	1	1	1	1	1	1	1	1	1	1	1	1	1	1	1	1	1	1	1	1	1	1	1	1	1	1	1	1	1	1	1	1	1	1	1	1	1	1	1	1	1	1	1	1	1	1
DG(18:4n3/0:0/22:6n3)	1	1	1	1	1	1	1	1	1	1	1	1	1	1	1	1	1	1	1	1	1	1	1	1	1	1	1	1	1	1	1	1	1	1	1	1	1	1	1	1	1	1	1	1	1	1	1	1	1
PE(14:1(9Z)/14:0)	1	1	1	1	1	1	1	1	1	1	1	1	1	1	1	1	1	1	1	1	1	1	1	1	1	1	1	1	1	1	1	1	1	1	1	1	1	1	1	1	1	1	1	1	1	1	1	1	1
PE(14:0/14:1(9Z))	1	1	1	1	1	1	1	1	1	1	1	1	1	1	1	1	1	1	1	1	1	1	1	1	1	1	1	1	1	1	1	1	1	1	1	1	1	1	1	1	1	1	1	1	1	1	1	1	1
DG(18:2n6/0:0/22:5n6)	597346	589814	560215	981745	989763	995040	2113050	2241950	2225084	2225418	2406749	2289484	842654	848229	840954	2241014	2169178	2246626	310138	280423	315355	706981	697730	732359	2626325	2667311	2673108	755139	760777	789537	519691	519915	528660	1229089	1244846	1246592	1047775	1073424	1042897	2716010	2637759	2647636	1405288	1394336	1456072	2605994	2640710	2734492	775868
PA(16:0e/18:0)	597346	589814	560215	981745	989763	995040	2234330	2210392	2230635	2714663	2399860	2327215	849136	833748	844581	2258643	2197538	2263602	310138	280423	315355	573841	603794	613295	2631721	2678296	2678417	755139	739677	789537	519691	519915	528660	1229089	478739	1246592	1047775	1073424	1046978	2732681	2684604	2672169	1416905	1394336	1456727	2611567	2660075	2775060	775868
DG(18:2n6/0:0/22:5n3)	597346	589814	560215	981745	989763	995040	2113050	2241950	2225084	2225418	2406749	2289484	842654	848229	840954	2241014	2169178	2246626	310138	280423	315355	706981	697730	732359	2626325	2667311	2673108	755139	760777	789537	519691	519915	528660	1229089	1244846	1246592	1047775	1073424	1042897	2716010	2637759	2647636	1405288	1394336	1456072	2605994	2640710	2734492	775868
PE(18:4(6Z,9Z,12Z,15Z)/14:1(9Z))	889513	869714	859040	1234395	1367456	1361537	818197	834254	842119	992596	1039800	971388	272509	275526	280591	843161	601367	623436	1051400	1040545	1142834	624283	650418	639426	366768	386512	373233	557401	475329	558949	442057	444637	463205	1234824	1233677	1269115	974287	1047893	1111098	1162933	994745	1115802	720323	709266	726525	354743	360834	298435	667384
PE(14:1(9Z)/18:4(6Z,9Z,12Z,15Z))	889513	869714	859040	1234395	1367456	1361537	818197	834254	842119	992596	1039800	971388	272509	275526	280591	843161	601367	623436	1051400	1040545	1142834	624283	650418	639426	366768	386512	373233	557401	475329	558949	442057	444637	463205	1234824	1233677	1269115	974287	1047893	1111098	1162933	994745	1115802	720323	709266	726525	354743	360834	298435	667384
LysoPC(28:0)	1	1	1	1	1	1	1	1	1	1	28153	1	1	1	1	68352	60417	66613	1	1	1	1	1	1	1	1	1	1	1	1	1	1	1	1	1	1	1	1	1	1	1	1	60710	44081	58022	1	1	1	1
PE(14:1(9Z)/16:1(9Z))	60969	69951	187475	245372	221551	276790	441464	706967	272795	711486	988017	933391	1	1	1	633695	602066	447533	151455	97620	1	45813	1	1	24442	61320	51654	80802	139710	171587	69988	187812	47056	182960	163969	157184	113478	250973	186372	785896	298238	133113	123170	45850	53162	164962	326642	190790	316578
PE(16:1(9Z)/14:1(9Z))	60969	69951	187475	245372	221551	276790	441464	706967	272795	711486	988017	933391	1	1	1	633695	602066	447533	151455	97620	1	45813	1	1	24442	61320	51654	80802	139710	171587	69988	187812	47056	182960	163969	157184	113478	250973	186372	785896	298238	133113	123170	45850	53162	164962	326642	190790	316578
PE(18:3(9Z,12Z,15Z)/14:1(9Z))	1	1	1	1	1	1	1	1	1	1	1	1	1	1	1	1	1	1	1	1	1	1	1	1	1	1	1	1	1	1	1	1	1	1	1	1	1	1	1	1	1	1	1	1	1	1	1	1	1
PE(18:4(6Z,9Z,12Z,15Z)/14:0)	1	1	1	1	1	1	1	1	1	1	1	1	1	1	1	1	1	1	1	1	1	1	1	1	1	1	1	1	1	1	1	1	1	1	1	1	1	1	1	1	1	1	1	1	1	1	1	1	1
PE(18:3(6Z,9Z,12Z)/14:1(9Z))	1	1	1	1	1	1	1	1	1	1	1	1	1	1	1	1	1	1	1	1	1	1	1	1	1	1	1	1	1	1	1	1	1	1	1	1	1	1	1	1	1	1	1	1	1	1	1	1	1
PE(14:0/18:4(6Z,9Z,12Z,15Z))	1	1	1	1	1	1	1	1	1	1	1	1	1	1	1	1	1	1	1	1	1	1	1	1	1	1	1	1	1	1	1	1	1	1	1	1	1	1	1	1	1	1	1	1	1	1	1	1	1
PE(14:1(9Z)/18:3(9Z,12Z,15Z))	1	1	1	1	1	1	1	1	1	1	1	1	1	1	1	1	1	1	1	1	1	1	1	1	1	1	1	1	1	1	1	1	1	1	1	1	1	1	1	1	1	1	1	1	1	1	1	1	1
PE(14:1(9Z)/18:3(6Z,9Z,12Z))	1	1	1	1	1	1	1	1	1	1	1	1	1	1	1	1	1	1	1	1	1	1	1	1	1	1	1	1	1	1	1	1	1	1	1	1	1	1	1	1	1	1	1	1	1	1	1	1	1
DG(20:1n9/0:0/18:2n6)	1	1	1	1	1	1	293028	302630	307692	583019	623743	595485	1	1	1	625311	639249	668697	1	1	1	1	1	1	322762	335880	340347	1	1	1	1	1	1	1	1	1	1	1	1	515589	481966	502740	151167	146006	149725	415314	431159	414023	1
DG(18:2n6/0:0/22:4n6)	2827110	2837523	2742428	3071035	3050364	3096253	5512321	5472881	5456515	7361306	7588028	7476561	3160478	3117904	3142089	7551189	7423052	7451689	1762338	1728856	1780359	2411778	2390696	2457516	5644558	5669606	5666136	2790367	2833017	2877507	2414538	2448608	2465036	4150294	4174736	4238358	4331123	4261091	4221796	7669291	7580304	7676928	5151903	5088383	5243636	7040160	6985164	7143844	3055659
CE(18:3(6Z,9Z,12Z))	1	1	1	1	1	1	211411	39962	35577	78891	153488	690887	45693	52627	48176	651683	570570	238703	1	1	1	1	1	1	1	1	1	1	1	1	1	1	1	1	1	1	1	1	1	1	1	1	1	1	1	1	1	1	1
CE(18:3(9Z,12Z,15Z))	1	1	1	1	1	1	211411	39962	35577	78891	153488	690887	45693	52627	48176	651683	570570	238703	1	1	1	1	1	1	1	1	1	1	1	1	1	1	1	1	1	1	1	1	1	1	1	1	1	1	1	1	1	1	1
DG(18:2n6/0:0/18:2n6)	1609280	1581065	1532265	4798977	5156414	5073061	9010134	9025454	9508607	10902327	10657198	10298756	2851452	2659222	2926692	9901144	11306112	12095588	1281296	1222394	1321075	3384258	3466369	3516175	9387842	9433614	9558410	3022727	2665840	3040176	1443945	1451345	1471423	4426935	4550447	4521278	4436284	4625070	4681966	11435480	10718736	11373338	7382324	7646053	7622210	8288248	8273142	7840513	2849175
DG(24:1(15Z)/15:0/0:0)	1	1	1	292345	314152	319367	495711	603556	590613	588965	434783	401481	1	1	1	501370	763185	705785	1	1	1	249742	252098	266710	562803	573572	574267	203462	190536	205105	1	1	1	313899	314966	315941	367010	366402	384393	677435	597601	662886	538962	538209	553302	396702	403804	367463	1
DG(15:0/24:1(15Z)/0:0)	1	1	1	292345	314152	319367	495711	603556	590613	588965	434783	401481	1	1	1	501370	763185	705785	1	1	1	249742	252098	266710	562803	573572	574267	203462	190536	205105	1	1	1	313899	314966	315941	367010	366402	384393	677435	597601	662886	538962	538209	553302	396702	403804	367463	1
DG(15:0/0:0/24:1n9)	1	1	1	292345	314152	319367	495711	603556	590613	588965	434783	401481	1	1	1	501370	763185	705785	1	1	1	249742	252098	266710	562803	573572	574267	203462	190536	205105	1	1	1	313899	314966	315941	367010	366402	384393	677435	597601	662886	538962	538209	553302	396702	403804	367463	1
DG(18:2n6/0:0/22:2n6)	1	1	1	84245	126690	1	65585	72033	71183	187460	208743	188198	1	1	1	142562	140269	153546	1	1	1	249742	238622	202525	217587	95161	414366	30719	1	1	1	1	1	1	252728	214071	206062	45387	1	126100	103833	122480	78262	364336	1	97554	100513	108673	1
20:5 Cholesteryl ester	1	1	1	66505	75209	79220	129013	120169	106625	1	206131	203301	21988	1	1	209497	204221	207892	1	1	1	55337	55813	57111	158481	167821	169741	1	1	1	1	1	1	79147	1	1	101043	103058	101576	211408	174875	198483	98969	1	93796	99021	1	98394	1
CE(20:5)	1	1	1	66505	75209	79220	1	1	1	1	1	1	1	1	1	1	1	1	1	1	1	55337	55813	57111	158481	167821	169741	1	1	1	1	1	1	79147	1	1	101043	103058	101576	211408	174875	198483	98969	1	93796	99021	1	98394	1
DG(20:4(8Z,11Z,14Z,17Z)/22:6(4Z,7Z,10Z,13Z,16Z,19Z)/0:0)	1	1	1	1	1	1	1	1	1	1	1	1	1	1	1	1	1	1	1	1	1	1	1	1	1	1	1	1	1	1	1	1	1	1	1	1	1	1	1	1	1	1	1	1	1	1	1	1	1
DG(20:5(5Z,8Z,11Z,14Z,17Z)/22:5(7Z,10Z,13Z,16Z,19Z)/0:0)	1	1	1	1	1	1	1	1	1	1	1	1	1	1	1	1	1	1	1	1	1	1	1	1	1	1	1	1	1	1	1	1	1	1	1	1	1	1	1	1	1	1	1	1	1	1	1	1	1
DG(20:5(5Z,8Z,11Z,14Z,17Z)/22:5(4Z,7Z,10Z,13Z,16Z)/0:0)	1	1	1	1	1	1	1	1	1	1	1	1	1	1	1	1	1	1	1	1	1	1	1	1	1	1	1	1	1	1	1	1	1	1	1	1	1	1	1	1	1	1	1	1	1	1	1	1	1
DG(22:5n6/0:0/20:5n3)	1	1	1	1	1	1	1	1	1	1	1	1	1	1	1	1	1	1	1	1	1	1	1	1	1	1	1	1	1	1	1	1	1	1	1	1	1	1	1	1	1	1	1	1	1	1	1	1	1
DG(22:5(7Z,10Z,13Z,16Z,19Z)/20:5(5Z,8Z,11Z,14Z,17Z)/0:0)	1	1	1	1	1	1	1	1	1	1	1	1	1	1	1	1	1	1	1	1	1	1	1	1	1	1	1	1	1	1	1	1	1	1	1	1	1	1	1	1	1	1	1	1	1	1	1	1	1
DG(22:5(4Z,7Z,10Z,13Z,16Z)/20:5(5Z,8Z,11Z,14Z,17Z)/0:0)	1	1	1	1	1	1	1	1	1	1	1	1	1	1	1	1	1	1	1	1	1	1	1	1	1	1	1	1	1	1	1	1	1	1	1	1	1	1	1	1	1	1	1	1	1	1	1	1	1
DG(20:4n3/0:0/22:6n3)	1	1	1	1	1	1	1	1	1	1	1	1	1	1	1	1	1	1	1	1	1	1	1	1	1	1	1	1	1	1	1	1	1	1	1	1	1	1	1	1	1	1	1	1	1	1	1	1	1
DG(20:4n6/0:0/22:6n3)	1	1	1	1	1	1	1	1	1	1	1	1	1	1	1	1	1	1	1	1	1	1	1	1	1	1	1	1	1	1	1	1	1	1	1	1	1	1	1	1	1	1	1	1	1	1	1	1	1
DG(22:6(4Z,7Z,10Z,13Z,16Z,19Z)/20:4(5Z,8Z,11Z,14Z)/0:0)	1	1	1	1	1	1	1	1	1	1	1	1	1	1	1	1	1	1	1	1	1	1	1	1	1	1	1	1	1	1	1	1	1	1	1	1	1	1	1	1	1	1	1	1	1	1	1	1	1
DG(20:5n3/0:0/22:5n3)	1	1	1	1	1	1	1	1	1	1	1	1	1	1	1	1	1	1	1	1	1	1	1	1	1	1	1	1	1	1	1	1	1	1	1	1	1	1	1	1	1	1	1	1	1	1	1	1	1
DG(20:4(5Z,8Z,11Z,14Z)/22:6(4Z,7Z,10Z,13Z,16Z,19Z)/0:0)	1	1	1	1	1	1	1	1	1	1	1	1	1	1	1	1	1	1	1	1	1	1	1	1	1	1	1	1	1	1	1	1	1	1	1	1	1	1	1	1	1	1	1	1	1	1	1	1	1
DG(22:6(4Z,7Z,10Z,13Z,16Z,19Z)/20:4(8Z,11Z,14Z,17Z)/0:0)	1	1	1	1	1	1	1	1	1	1	1	1	1	1	1	1	1	1	1	1	1	1	1	1	1	1	1	1	1	1	1	1	1	1	1	1	1	1	1	1	1	1	1	1	1	1	1	1	1
Galactosylceramide (d18:1/14:0)	1	1	1	1	1	1	1	1	1	1	1	1	1	1	1	1	1	1	1	1	1	1	1	1	1	1	1	1	1	1	1	1	1	1	1	1	1	1	1	1	1	1	1	1	1	1	1	1	1
DG(22:2n6/0:0/18:4n3)	166021	162943	33484	183005	241680	201172	1100371	1187835	1517621	1787691	193906	1066939	179236	176138	185295	548601	1369517	1879028	82393	83464	95538	135263	145036	143708	1680577	1618653	1751878	81350	1	91457	49268	1	37699	258625	297374	288089	254963	241938	241158	689095	1565129	675324	1	663073	640289	1873768	1757672	1677702	50257
CE(18:2(9Z,12Z))	1	1	1	1	1	1	1	1	1	1	1	1	1	1	1	1	1	1	1	1	1	1	1	1	1	1	1	1	1	1	1	1	1	1	1	1	1	1	1	1	1	1	20682	1	53375	1	1	1	1
18:2 Cholesteryl ester	1	1	1	1	1	1	1	1	1	1	1	1	1	1	1	1	1	1	1	1	1	1	1	1	1	1	1	1	1	1	1	1	1	1	1	1	1	1	1	1	1	1	20682	1	53375	1	1	1	1
CE(18:2(9,11))	1	1	1	1	1	1	1	1	1	1	1	1	1	1	1	1	1	1	1	1	1	1	1	1	1	1	1	1	1	1	1	1	1	1	1	1	1	1	1	1	1	1	20682	1	53375	1	1	1	1
SM(d18:1/14:1(9Z)(OH))	130491	125413	165129	1	1	1	1	1	1	1	1	1	1	1	1	1	1	1	1	1	1	1	1	1	1	1	1	1	1	1	1	1	1	1	1	1	1	1	1	1	1	1	1	1	1	1	1	1	1
PA(16:0/16:0)	706066	693317	672237	1265160	1288958	1259530	2769129	1	2817596	1	3709986	1	1070373	1065460	1091121	3426068	3343954	3426833	432256	379830	432209	873356	881634	905528	1	2935617	1	931742	931624	960885	569323	552912	579972	1402910	1482359	1440571	1515885	1499176	1537560	3531759	3595752	1	2491025	2499267	2508352	3229115	3285761	1	1105147
SM(d18:0/14:1(9Z)(OH))	206892	203398	196595	149931	153291	150724	59407	192128	287933	285947	165910	1	1	1	1	1	1	112296	1	1	1	1	1	1	324205	328502	341940	124318	123052	135892	1	1	1	229611	250581	252102	352196	349901	335440	521803	491578	504527	321962	379357	387476	402182	386766	405204	1
DG(20:3n9/0:0/22:6n3)	166021	162943	139628	172217	170685	174965	363037	377177	375988	578788	607671	586843	179236	176138	185295	548601	521171	538520	1	1	1	1	1	1	431128	431713	434311	142217	135340	146952	1	1	1	297265	312780	319704	448298	444445	442498	689095	670119	675324	497545	483544	517159	1	1	1	1
DG(22:4(7Z,10Z,13Z,16Z)/20:5(5Z,8Z,11Z,14Z,17Z)/0:0)	166021	162943	139628	172217	170685	174965	363037	377177	375988	578788	607671	586843	179236	176138	185295	548601	521171	538520	1	1	1	1	1	1	431128	431713	434311	142217	135340	146952	1	1	1	297265	312780	319704	448298	444445	442498	689095	670119	675324	497545	483544	517159	1	1	1	1
DG(20:3(8Z,11Z,14Z)/22:6(4Z,7Z,10Z,13Z,16Z,19Z)/0:0)	166021	162943	139628	172217	170685	174965	363037	377177	375988	578788	607671	586843	179236	176138	185295	548601	521171	538520	1	1	1	1	1	1	431128	431713	434311	142217	135340	146952	1	1	1	297265	312780	319704	448298	444445	442498	689095	670119	675324	497545	483544	517159	1	1	1	1
DG(20:3n6/0:0/22:6n3)	166021	162943	139628	172217	170685	174965	363037	377177	375988	578788	607671	586843	179236	176138	185295	548601	521171	538520	1	1	1	1	1	1	431128	431713	434311	142217	135340	146952	1	1	1	297265	312780	319704	448298	444445	442498	689095	670119	675324	497545	483544	517159	1	1	1	1
DG(20:4(8Z,11Z,14Z,17Z)/22:5(7Z,10Z,13Z,16Z,19Z)/0:0)	166021	162943	139628	172217	170685	174965	363037	377177	375988	578788	607671	586843	179236	176138	185295	548601	521171	538520	1	1	1	1	1	1	431128	431713	434311	142217	135340	146952	1	1	1	297265	312780	319704	448298	444445	442498	689095	670119	675324	497545	483544	517159	1	1	1	1
DG(22:5(4Z,7Z,10Z,13Z,16Z)/20:4(5Z,8Z,11Z,14Z)/0:0)	166021	162943	139628	172217	170685	174965	363037	377177	375988	578788	607671	586843	179236	176138	185295	548601	521171	538520	1	1	1	1	1	1	431128	431713	434311	142217	135340	146952	1	1	1	297265	312780	319704	448298	444445	442498	689095	670119	675324	497545	483544	517159	1	1	1	1
DG(20:5(5Z,8Z,11Z,14Z,17Z)/22:4(7Z,10Z,13Z,16Z)/0:0)	166021	162943	139628	172217	170685	174965	363037	377177	375988	578788	607671	586843	179236	176138	185295	548601	521171	538520	1	1	1	1	1	1	431128	431713	434311	142217	135340	146952	1	1	1	297265	312780	319704	448298	444445	442498	689095	670119	675324	497545	483544	517159	1	1	1	1
DG(22:5(7Z,10Z,13Z,16Z,19Z)/20:4(8Z,11Z,14Z,17Z)/0:0)	166021	162943	139628	172217	170685	174965	363037	377177	375988	578788	607671	586843	179236	176138	185295	548601	521171	538520	1	1	1	1	1	1	431128	431713	434311	142217	135340	146952	1	1	1	297265	312780	319704	448298	444445	442498	689095	670119	675324	497545	483544	517159	1	1	1	1
DG(22:6(4Z,7Z,10Z,13Z,16Z,19Z)/20:3(8Z,11Z,14Z)/0:0)	166021	162943	139628	172217	170685	174965	363037	377177	375988	578788	607671	586843	179236	176138	185295	548601	521171	538520	1	1	1	1	1	1	431128	431713	434311	142217	135340	146952	1	1	1	297265	312780	319704	448298	444445	442498	689095	670119	675324	497545	483544	517159	1	1	1	1
DG(22:4n6/0:0/20:5n3)	166021	162943	139628	172217	170685	174965	363037	377177	375988	578788	607671	586843	179236	176138	185295	548601	521171	538520	1	1	1	1	1	1	431128	431713	434311	142217	135340	146952	1	1	1	297265	312780	319704	448298	444445	442498	689095	670119	675324	497545	483544	517159	1	1	1	1
DG(20:4(5Z,8Z,11Z,14Z)/22:5(4Z,7Z,10Z,13Z,16Z)/0:0)	166021	162943	139628	172217	170685	174965	363037	377177	375988	578788	607671	586843	179236	176138	185295	548601	521171	538520	1	1	1	1	1	1	431128	431713	434311	142217	135340	146952	1	1	1	297265	312780	319704	448298	444445	442498	689095	670119	675324	497545	483544	517159	1	1	1	1
DG(20:4n6/0:0/22:5n6)	166021	162943	139628	172217	170685	174965	363037	377177	375988	578788	607671	586843	179236	176138	185295	548601	521171	538520	1	1	1	1	1	1	431128	431713	434311	142217	135340	146952	1	1	1	297265	312780	319704	448298	444445	442498	689095	670119	675324	497545	483544	517159	1	1	1	1
DG(20:4(5Z,8Z,11Z,14Z)/22:5(7Z,10Z,13Z,16Z,19Z)/0:0)	166021	162943	139628	172217	170685	174965	363037	377177	375988	578788	607671	586843	179236	176138	185295	548601	521171	538520	1	1	1	1	1	1	431128	431713	434311	142217	135340	146952	1	1	1	297265	312780	319704	448298	444445	442498	689095	670119	675324	497545	483544	517159	1	1	1	1
DG(22:5(7Z,10Z,13Z,16Z,19Z)/20:4(5Z,8Z,11Z,14Z)/0:0)	166021	162943	139628	172217	170685	174965	363037	377177	375988	578788	607671	586843	179236	176138	185295	548601	521171	538520	1	1	1	1	1	1	431128	431713	434311	142217	135340	146952	1	1	1	297265	312780	319704	448298	444445	442498	689095	670119	675324	497545	483544	517159	1	1	1	1
DG(20:4n6/0:0/22:5n3)	166021	162943	139628	172217	170685	174965	363037	377177	375988	578788	607671	586843	179236	176138	185295	548601	521171	538520	1	1	1	1	1	1	431128	431713	434311	142217	135340	146952	1	1	1	297265	312780	319704	448298	444445	442498	689095	670119	675324	497545	483544	517159	1	1	1	1
DG(20:3(5Z,8Z,11Z)/22:6(4Z,7Z,10Z,13Z,16Z,19Z)/0:0)	166021	162943	139628	172217	170685	174965	363037	377177	375988	578788	607671	586843	179236	176138	185295	548601	521171	538520	1	1	1	1	1	1	431128	431713	434311	142217	135340	146952	1	1	1	297265	312780	319704	448298	444445	442498	689095	670119	675324	497545	483544	517159	1	1	1	1
DG(22:5n6/0:0/20:4n3)	166021	162943	139628	172217	170685	174965	363037	377177	375988	578788	607671	586843	179236	176138	185295	548601	521171	538520	1	1	1	1	1	1	431128	431713	434311	142217	135340	146952	1	1	1	297265	312780	319704	448298	444445	442498	689095	670119	675324	497545	483544	517159	1	1	1	1
DG(20:4(8Z,11Z,14Z,17Z)/22:5(4Z,7Z,10Z,13Z,16Z)/0:0)	166021	162943	139628	172217	170685	174965	363037	377177	375988	578788	607671	586843	179236	176138	185295	548601	521171	538520	1	1	1	1	1	1	431128	431713	434311	142217	135340	146952	1	1	1	297265	312780	319704	448298	444445	442498	689095	670119	675324	497545	483544	517159	1	1	1	1
DG(22:6(4Z,7Z,10Z,13Z,16Z,19Z)/20:3(5Z,8Z,11Z)/0:0)	166021	162943	139628	172217	170685	174965	363037	377177	375988	578788	607671	586843	179236	176138	185295	548601	521171	538520	1	1	1	1	1	1	431128	431713	434311	142217	135340	146952	1	1	1	297265	312780	319704	448298	444445	442498	689095	670119	675324	497545	483544	517159	1	1	1	1
DG(22:5(4Z,7Z,10Z,13Z,16Z)/20:4(8Z,11Z,14Z,17Z)/0:0)	166021	162943	139628	172217	170685	174965	363037	377177	375988	578788	607671	586843	179236	176138	185295	548601	521171	538520	1	1	1	1	1	1	431128	431713	434311	142217	135340	146952	1	1	1	297265	312780	319704	448298	444445	442498	689095	670119	675324	497545	483544	517159	1	1	1	1
DG(20:4n3/0:0/22:5n3)	166021	162943	139628	172217	170685	174965	363037	377177	375988	578788	607671	586843	179236	176138	185295	548601	521171	538520	1	1	1	1	1	1	431128	431713	434311	142217	135340	146952	1	1	1	297265	312780	319704	448298	444445	442498	689095	670119	675324	497545	483544	517159	146665	153932	142859	1
PC(14:1(9Z)/14:1(9Z))	1	1	1	1	1	1	154435	1	153016	198630	210606	203555	1	1	1	1	183514	195006	1	1	1	1	1	1	182744	196084	189521	1	1	1	1	1	1	1	1	1	1	1	1	238909	217442	228009	185835	176221	187580	225541	236134	224187	1
PC(16:1(9Z)/12:0)	1	1	1	1	1	1	1	1	1	1	1	1	1	1	1	1	1	1	1	1	1	1	1	1	1	1	1	1	1	1	1	1	1	1	1	1	1	1	1	1	1	1	1	1	1	1	1	1	1
PC(16:0/13:0)	1	1	1	1	1	1	1	1	1	1	1	1	1	1	1	1	1	1	1	1	1	1	1	1	1	1	1	1	1	1	1	1	1	1	1	1	1	1	1	1	1	1	1	1	1	1	1	1	1
PC(12:0/17:0)	1	1	1	1	1	1	1	1	1	1	1	1	1	1	1	1	1	1	1	1	1	1	1	1	1	1	1	1	1	1	1	1	1	1	1	1	1	1	1	1	1	1	1	1	1	1	1	1	1
PE(16:0/16:0)	1	1	1	1	1	1	1	1	1	1	1	1	1	1	1	1	1	1	1	1	1	1	1	1	1	1	1	1	1	1	1	1	1	1	1	1	1	1	1	1	1	1	1	1	1	1	1	1	1
PC(15:0/14:0)	1	1	1	1	1	1	1	1	1	1	1	1	1	1	1	1	1	1	1	1	1	1	1	1	1	1	1	1	1	1	1	1	1	1	1	1	1	1	1	1	1	1	1	1	1	1	1	1	1
3-Sn-phosphatidylethanolamine	1	1	1	1	1	1	1	1	1	1	1	1	1	1	1	1	1	1	1	1	1	1	1	1	1	1	1	1	1	1	1	1	1	1	1	1	1	1	1	1	1	1	1	1	1	1	1	1	1
PE(14:0/18:0)	1	1	1	1	1	1	1	1	1	1	1	1	1	1	1	1	1	1	1	1	1	1	1	1	1	1	1	1	1	1	1	1	1	1	1	1	1	1	1	1	1	1	1	1	1	1	1	1	1
PC(9:0/20:0)	1	1	1	1	1	1	1	1	1	1	1	1	1	1	1	1	1	1	1	1	1	1	1	1	1	1	1	1	1	1	1	1	1	1	1	1	1	1	1	1	1	1	1	1	1	1	1	1	1
PC(10:0/19:0)	1	1	1	1	1	1	1	1	1	1	1	1	1	1	1	1	1	1	1	1	1	1	1	1	1	1	1	1	1	1	1	1	1	1	1	1	1	1	1	1	1	1	1	1	1	1	1	1	1
PC(13:0/16:0)	1	1	1	1	1	1	1	1	1	1	1	1	1	1	1	1	1	1	1	1	1	1	1	1	1	1	1	1	1	1	1	1	1	1	1	1	1	1	1	1	1	1	1	1	1	1	1	1	1
PC(8:0/21:0)	1	1	1	1	1	1	1	1	1	1	1	1	1	1	1	1	1	1	1	1	1	1	1	1	1	1	1	1	1	1	1	1	1	1	1	1	1	1	1	1	1	1	1	1	1	1	1	1	1
PC(19:0/10:0)	1	1	1	1	1	1	1	1	1	1	1	1	1	1	1	1	1	1	1	1	1	1	1	1	1	1	1	1	1	1	1	1	1	1	1	1	1	1	1	1	1	1	1	1	1	1	1	1	1
PE(18:0/14:0)	1	1	1	1	1	1	1	1	1	1	1	1	1	1	1	1	1	1	1	1	1	1	1	1	1	1	1	1	1	1	1	1	1	1	1	1	1	1	1	1	1	1	1	1	1	1	1	1	1
PC(17:0/12:0)	1	1	1	1	1	1	1	1	1	1	1	1	1	1	1	1	1	1	1	1	1	1	1	1	1	1	1	1	1	1	1	1	1	1	1	1	1	1	1	1	1	1	1	1	1	1	1	1	1
PC(20:0/9:0)	1	1	1	1	1	1	1	1	1	1	1	1	1	1	1	1	1	1	1	1	1	1	1	1	1	1	1	1	1	1	1	1	1	1	1	1	1	1	1	1	1	1	1	1	1	1	1	1	1
PC(14:0/15:0)	1	1	1	1	1	1	1	1	1	1	1	1	1	1	1	1	1	1	1	1	1	1	1	1	1	1	1	1	1	1	1	1	1	1	1	1	1	1	1	1	1	1	1	1	1	1	1	1	1
PE(P-18:1(9Z)/14:0)	1	1	1	1	1	1	1	1	1	1	1	1	1	1	1	1	1	1	1	1	1	1	1	1	1	1	1	1	1	1	1	1	1	54165	1	43461	1	1	1	42669	1	26700	1	1	1	1	1	1	1
PE(P-18:0/14:1(9Z))	1	1	1	1	1	1	1	1	1	1	1	1	1	1	1	1	1	1	1	1	1	1	1	1	1	1	1	1	1	1	1	1	1	54165	1	43461	1	1	1	42669	1	26700	1	1	1	1	1	1	1
PE(14:0/P-18:1(9Z))	1	1	1	1	1	1	1	1	1	1	1	1	1	1	1	1	1	1	1	1	1	1	1	1	1	1	1	1	1	1	1	1	1	54165	1	43461	1	1	1	42669	1	26700	1	1	1	1	1	1	1
PE(P-18:1(11Z)/14:0)	1	1	1	1	1	1	1	1	1	1	1	1	1	1	1	1	1	1	1	1	1	1	1	1	1	1	1	1	1	1	1	1	1	54165	1	43461	1	1	1	42669	1	26700	1	1	1	1	1	1	1
PE(14:1(9Z)/P-18:0)	1	1	1	1	1	1	1	1	1	1	1	1	1	1	1	1	1	1	1	1	1	1	1	1	1	1	1	1	1	1	1	1	1	54165	1	43461	1	1	1	42669	1	26700	1	1	1	1	1	1	1
PE(P-16:0/16:1(9Z))	1	1	1	1	1	1	1	1	1	1	1	1	1	1	1	1	1	1	1	1	1	1	1	1	1	1	1	1	1	1	1	1	1	54165	1	43461	1	1	1	42669	1	26700	1	1	1	1	1	1	1
PE(14:0/P-18:1(11Z))	1	1	1	1	1	1	1	1	1	1	1	1	1	1	1	1	1	1	1	1	1	1	1	1	1	1	1	1	1	1	1	1	1	54165	1	43461	1	1	1	42669	1	26700	1	1	1	1	1	1	1
PE(16:1(9Z)/P-16:0)	1	1	1	1	1	1	1	1	1	1	1	1	1	1	1	1	1	1	1	1	1	1	1	1	1	1	1	1	1	1	1	1	1	54165	1	43461	1	1	1	42669	1	26700	1	1	1	1	1	1	1
PE(16:0/P-16:0)	1	1	1	1	1	1	1	1	1	1	25662	1	1	1	1	1	88304	106227	1	1	1	1	1	1	1	1	1	1	1	1	1	1	1	54165	40276	43461	1	1	1	42669	1	26700	1	1	1	1	1	1	1
PE(14:0/P-18:0)	1	1	1	1	1	1	1	1	1	1	25662	1	1	1	1	1	88304	106227	1	1	1	1	1	1	1	1	1	1	1	1	1	1	1	54165	40276	43461	1	1	1	42669	1	26700	1	1	1	1	1	1	1
PE(P-16:0e/16:0)	1	1	1	1	1	1	1	1	1	1	25662	1	1	1	1	1	88304	106227	1	1	1	1	1	1	1	1	1	1	1	1	1	1	1	54165	40276	43461	1	1	1	42669	1	26700	1	1	1	1	1	1	1
PE(P-18:0/14:0)	1	1	1	1	1	1	1	1	1	1	25662	1	1	1	1	1	88304	106227	1	1	1	1	1	1	1	1	1	1	1	1	1	1	1	54165	40276	43461	1	1	1	42669	1	26700	1	1	1	1	1	1	1
SM(d18:1/14:0)	1	1	1	47439	78664	1	1	1	1	1	1	1	1	1	1	1	1	1	1	36259	50227	1	1	105943	35186	1	33942	52217	49788	27366	1	24885	1	26172	1	1	1	93619	1	1	1	1	45209	1	1	1	1	1	1
PE(P-16:0/18:4(6Z,9Z,12Z,15Z))	1	1	1	1	1	1	1	1	1	1	1	1	1	1	1	1	1	1	1	1	1	1	1	1	1	1	1	1	1	1	1	1	1	1	1	1	1	1	1	1	1	1	1	1	1	1	1	1	1
PE(18:4(6Z,9Z,12Z,15Z)/P-16:0)	1	1	1	1	1	1	1	1	1	1	1	1	1	1	1	1	1	1	1	1	1	1	1	1	1	1	1	1	1	1	1	1	1	1	1	1	1	1	1	1	1	1	1	1	1	1	1	1	1
PE(15:0/16:0)	1	1	1	1	1	1	63271	62973	57486	54623	63218	68202	1	1	1	67711	60457	63803	1	1	1	65387	63112	38145	1	1	1	1	1	1	1	1	1	23023	1	29659	1	1	1	78850	63771	70669	41133	30130	42314	74232	82141	73913	1
PC(14:0/14:0)	1	1	1	1	1	1	63271	62973	57486	54623	63218	68202	1	1	1	67711	60457	63803	1	1	1	65387	63112	38145	1	1	1	1	1	1	1	1	1	23023	1	29659	1	1	1	78850	63771	70669	41133	30130	42314	74232	82141	73913	1
PE(16:0/15:0)	1	1	1	1	1	1	63271	62973	57486	54623	63218	68202	1	1	1	67711	60457	63803	1	1	1	65387	63112	38145	69223	78463	80930	1	1	1	1	1	1	23023	1	29659	1	1	1	78850	63771	70669	41133	30130	42314	74232	82141	73913	1
DG(22:5(7Z,10Z,13Z,16Z,19Z)/20:2(11Z,14Z)/0:0)	1	1	1	1	1	1	1	1	1	45083	45807	45604	1	1	1	30758	29553	35384	1	1	1	1	1	1	778454	605802	842008	1	1	1	1	1	1	1	129392	100064	46221	1	1	345032	545662	761248	1	366491	1	740763	232706	610436	1
DG(20:2(11Z,14Z)/22:5(4Z,7Z,10Z,13Z,16Z)/0:0)	1	1	1	1	1	1	1	1	1	45083	45807	45604	1	1	1	30758	29553	35384	1	1	1	1	1	1	778454	605802	842008	1	1	1	1	1	1	1	129392	100064	46221	1	1	345032	545662	761248	1	366491	1	740763	232706	610436	1
DG(20:1(11Z)/22:6(4Z,7Z,10Z,13Z,16Z,19Z)/0:0)	1	1	1	1	1	1	1	1	1	45083	45807	45604	1	1	1	30758	29553	35384	1	1	1	1	1	1	778454	605802	842008	1	1	1	1	1	1	1	129392	100064	46221	1	1	345032	545662	761248	1	366491	1	740763	232706	610436	1
DG(20:2n6/0:0/22:5n6)	1	1	1	1	1	1	1	1	1	45083	45807	45604	1	1	1	30758	29553	35384	1	1	1	1	1	1	778454	605802	842008	1	1	1	1	1	1	1	129392	100064	46221	1	1	345032	545662	761248	1	366491	1	740763	232706	610436	1
DG(20:2n6/0:0/22:5n3)	1	1	1	1	1	1	1	1	1	45083	45807	45604	1	1	1	30758	29553	35384	1	1	1	1	1	1	778454	605802	842008	1	1	1	1	1	1	1	129392	100064	46221	1	1	345032	545662	761248	1	366491	1	740763	232706	610436	1
DG(20:3n9/0:0/22:4n6)	1	1	1	1	1	1	1	1	1	45083	45807	45604	1	1	1	30758	29553	35384	1	1	1	1	1	1	778454	605802	842008	1	1	1	1	1	1	1	129392	100064	46221	1	1	345032	545662	761248	1	366491	1	740763	232706	610436	1
DG(20:1n9/0:0/22:6n3)	1	1	1	1	1	1	1	1	1	45083	45807	45604	1	1	1	30758	29553	35384	1	1	1	1	1	1	778454	605802	842008	1	1	1	1	1	1	1	129392	100064	46221	1	1	345032	545662	761248	1	366491	1	740763	232706	610436	1
DG(20:3(8Z,11Z,14Z)/22:4(7Z,10Z,13Z,16Z)/0:0)	1	1	1	1	1	1	1	1	1	45083	45807	45604	1	1	1	30758	29553	35384	1	1	1	1	1	1	778454	605802	842008	1	1	1	1	1	1	1	129392	100064	46221	1	1	345032	545662	761248	1	366491	1	740763	232706	610436	1
DG(22:2(13Z,16Z)/20:5(5Z,8Z,11Z,14Z,17Z)/0:0)	1	1	1	1	1	1	1	1	1	45083	45807	45604	1	1	1	30758	29553	35384	1	1	1	1	1	1	778454	605802	842008	1	1	1	1	1	1	1	129392	100064	46221	1	1	345032	545662	761248	1	366491	1	740763	232706	610436	1
DG(20:2(11Z,14Z)/22:5(7Z,10Z,13Z,16Z,19Z)/0:0)	1	1	1	1	1	1	1	1	1	45083	45807	45604	1	1	1	30758	29553	35384	1	1	1	1	1	1	778454	605802	842008	1	1	1	1	1	1	1	129392	100064	46221	1	1	345032	545662	761248	1	366491	1	740763	232706	610436	1
DG(20:3(5Z,8Z,11Z)/22:4(7Z,10Z,13Z,16Z)/0:0)	1	1	1	1	1	1	1	1	1	45083	45807	45604	1	1	1	30758	29553	35384	1	1	1	1	1	1	778454	605802	842008	1	1	1	1	1	1	1	129392	100064	46221	1	1	345032	545662	761248	1	366491	1	740763	232706	610436	1
DG(22:4(7Z,10Z,13Z,16Z)/20:3(5Z,8Z,11Z)/0:0)	1	1	1	1	1	1	1	1	1	45083	45807	45604	1	1	1	30758	29553	35384	1	1	1	1	1	1	778454	605802	842008	1	1	1	1	1	1	1	129392	100064	46221	1	1	345032	545662	761248	1	366491	1	740763	232706	610436	1
DG(22:6(4Z,7Z,10Z,13Z,16Z,19Z)/20:1(11Z)/0:0)	1	1	1	1	1	1	1	1	1	45083	45807	45604	1	1	1	30758	29553	35384	1	1	1	1	1	1	778454	605802	842008	1	1	1	1	1	1	1	129392	100064	46221	1	1	345032	545662	761248	1	366491	1	740763	232706	610436	1
DG(20:5(5Z,8Z,11Z,14Z,17Z)/22:2(13Z,16Z)/0:0)	1	1	1	1	1	1	1	1	1	45083	45807	45604	1	1	1	30758	29553	35384	1	1	1	1	1	1	778454	605802	842008	1	1	1	1	1	1	1	129392	100064	46221	1	1	345032	545662	761248	1	366491	1	740763	232706	610436	1
DG(20:3n6/0:0/22:4n6)	1	1	1	1	1	1	1	1	1	45083	45807	45604	1	1	1	30758	29553	35384	1	1	1	1	1	1	778454	605802	842008	1	1	1	1	1	1	1	129392	100064	46221	1	1	345032	545662	761248	1	366491	1	740763	232706	610436	1
DG(22:4(7Z,10Z,13Z,16Z)/20:3(8Z,11Z,14Z)/0:0)	1	1	1	1	1	1	1	1	1	45083	45807	45604	1	1	1	30758	29553	35384	1	1	1	1	1	1	778454	605802	842008	1	1	1	1	1	1	1	129392	100064	46221	1	1	345032	545662	761248	1	366491	1	740763	232706	610436	1
DG(22:5(4Z,7Z,10Z,13Z,16Z)/20:2(11Z,14Z)/0:0)	1	1	1	1	1	1	1	1	1	45083	45807	45604	1	1	1	30758	29553	35384	1	1	1	1	1	1	778454	605802	842008	1	1	1	1	1	1	1	129392	100064	46221	1	1	345032	545662	761248	1	366491	1	740763	232706	610436	1
DG(22:2n6/0:0/20:5n3)	1	1	1	1	1	1	1	1	1	45083	45807	45604	1	1	1	30758	29553	35384	1	1	1	1	1	1	778454	605802	842008	1	1	1	1	1	1	1	129392	100064	46221	1	1	345032	545662	761248	1	366491	1	740763	232706	610436	1
PE(15:0/18:4(6Z,9Z,12Z,15Z))	1	1	1	1	1	1	1	1	1	1	1	1	1	1	1	1	1	1	1	1	1	1	1	1	1	1	1	1	1	1	1	1	1	1	1	1	1	1	1	1	1	1	1	1	1	1	1	1	1
PE(18:4(6Z,9Z,12Z,15Z)/15:0)	1	1	1	1	1	1	1	1	1	1	1	1	1	1	1	1	1	1	1	1	1	1	1	1	1	1	1	1	1	1	1	1	1	1	1	1	1	1	1	1	1	1	1	1	1	1	1	1	1
DG(20:0/20:3(8Z,11Z,14Z)/0:0)	448102	443102	422485	1078972	1159094	1168429	4574251	4601892	4613290	5419920	5520722	5354335	815976	826984	838629	5167002	5230435	5338415	190507	175497	194673	625956	637443	660388	4767327	4809377	4866583	680980	606168	670002	339786	343288	362095	1462244	1471188	1476590	1149767	1221177	1224773	4844258	4481141	4741305	2254033	2253242	2316976	4823953	4840885	4578677	660004
DG(20:0/0:0/20:3n6)	448102	443102	422485	1078972	1159094	1168429	4574251	4601892	4613290	5419920	5520722	5354335	815976	826984	838629	5167002	5230435	5338415	190507	175497	194673	625956	637443	660388	4767327	4809377	4866583	680980	606168	670002	339786	343288	362095	1462244	1471188	1476590	1149767	1221177	1224773	4844258	4481141	4741305	2254033	2253242	2316976	4823953	4840885	4578677	660004
DG(20:0/0:0/20:3n9)	448102	443102	422485	1078972	1159094	1168429	4574251	4601892	4613290	5419920	5520722	5354335	815976	826984	838629	5167002	5230435	5338415	190507	175497	194673	625956	637443	660388	4767327	4809377	4866583	680980	606168	670002	339786	343288	362095	1462244	1471188	1476590	1149767	1221177	1224773	4844258	4481141	4741305	2254033	2253242	2316976	4823953	4840885	4578677	660004
DG(20:2(11Z,14Z)/20:1(11Z)/0:0)	448102	443102	422485	1078972	1159094	1168429	4574251	4601892	4613290	5419920	5520722	5354335	815976	826984	838629	5167002	5230435	5338415	190507	175497	194673	625956	637443	660388	4767327	4809377	4866583	680980	606168	670002	339786	343288	362095	1462244	1471188	1476590	1149767	1221177	1224773	4844258	4481141	4741305	2254033	2253242	2316976	4823953	4840885	4578677	660004
DG(22:0/18:3(6Z,9Z,12Z)/0:0)	448102	443102	422485	1078972	1159094	1168429	4574251	4601892	4613290	5419920	5520722	5354335	815976	826984	838629	5167002	5230435	5338415	190507	175497	194673	625956	637443	660388	4767327	4809377	4866583	680980	606168	670002	339786	343288	362095	1462244	1471188	1476590	1149767	1221177	1224773	4844258	4481141	4741305	2254033	2253242	2316976	4823953	4840885	4578677	660004
DG(18:1(9Z)/22:2(13Z,16Z)/0:0)	448102	443102	422485	1078972	1159094	1168429	4574251	4601892	4613290	5419920	5520722	5354335	815976	826984	838629	5167002	5230435	5338415	190507	175497	194673	625956	637443	660388	4767327	4809377	4866583	680980	606168	670002	339786	343288	362095	1462244	1471188	1476590	1149767	1221177	1224773	4844258	4481141	4741305	2254033	2253242	2316976	4823953	4840885	4578677	660004
DG(22:2(13Z,16Z)/18:1(9Z)/0:0)	448102	443102	422485	1078972	1159094	1168429	4574251	4601892	4613290	5419920	5520722	5354335	815976	826984	838629	5167002	5230435	5338415	190507	175497	194673	625956	637443	660388	4767327	4809377	4866583	680980	606168	670002	339786	343288	362095	1462244	1471188	1476590	1149767	1221177	1224773	4844258	4481141	4741305	2254033	2253242	2316976	4823953	4840885	4578677	660004
DG(18:3(6Z,9Z,12Z)/22:0/0:0)	448102	443102	422485	1078972	1159094	1168429	4574251	4601892	4613290	5419920	5520722	5354335	815976	826984	838629	5167002	5230435	5338415	190507	175497	194673	625956	637443	660388	4767327	4809377	4866583	680980	606168	670002	339786	343288	362095	1462244	1471188	1476590	1149767	1221177	1224773	4844258	4481141	4741305	2254033	2253242	2316976	4823953	4840885	4578677	660004
DG(18:1n7/0:0/22:2n6)	448102	443102	422485	1078972	1159094	1168429	4574251	4601892	4613290	5419920	5520722	5354335	815976	826984	838629	5167002	5230435	5338415	190507	175497	194673	625956	637443	660388	4767327	4809377	4866583	680980	606168	670002	339786	343288	362095	1462244	1471188	1476590	1149767	1221177	1224773	4844258	4481141	4741305	2254033	2253242	2316976	4823953	4840885	4578677	660004
DG(18:1(11Z)/22:2(13Z,16Z)/0:0)	448102	443102	422485	1078972	1159094	1168429	4574251	4601892	4613290	5419920	5520722	5354335	815976	826984	838629	5167002	5230435	5338415	190507	175497	194673	625956	637443	660388	4767327	4809377	4866583	680980	606168	670002	339786	343288	362095	1462244	1471188	1476590	1149767	1221177	1224773	4844258	4481141	4741305	2254033	2253242	2316976	4823953	4840885	4578677	660004
DG(22:0/18:3(9Z,12Z,15Z)/0:0)	448102	443102	422485	1078972	1159094	1168429	4574251	4601892	4613290	5419920	5520722	5354335	815976	826984	838629	5167002	5230435	5338415	190507	175497	194673	625956	637443	660388	4767327	4809377	4866583	680980	606168	670002	339786	343288	362095	1462244	1471188	1476590	1149767	1221177	1224773	4844258	4481141	4741305	2254033	2253242	2316976	4823953	4840885	4578677	660004
DG(20:3(5Z,8Z,11Z)/20:0/0:0)	448102	443102	422485	1078972	1159094	1168429	4574251	4601892	4613290	5419920	5520722	5354335	815976	826984	838629	5167002	5230435	5338415	190507	175497	194673	625956	637443	660388	4767327	4809377	4866583	680980	606168	670002	339786	343288	362095	1462244	1471188	1476590	1149767	1221177	1224773	4844258	4481141	4741305	2254033	2253242	2316976	4823953	4840885	4578677	660004
DG(22:2(13Z,16Z)/18:1(11Z)/0:0)	448102	443102	422485	1078972	1159094	1168429	4574251	4601892	4613290	5419920	5520722	5354335	815976	826984	838629	5167002	5230435	5338415	190507	175497	194673	625956	637443	660388	4767327	4809377	4866583	680980	606168	670002	339786	343288	362095	1462244	1471188	1476590	1149767	1221177	1224773	4844258	4481141	4741305	2254033	2253242	2316976	4823953	4840885	4578677	660004
DG(22:0/0:0/18:3n6)	448102	443102	422485	1078972	1159094	1168429	4574251	4601892	4613290	5419920	5520722	5354335	815976	826984	838629	5167002	5230435	5338415	190507	175497	194673	625956	637443	660388	4767327	4809377	4866583	680980	606168	670002	339786	343288	362095	1462244	1471188	1476590	1149767	1221177	1224773	4844258	4481141	4741305	2254033	2253242	2316976	4823953	4840885	4578677	660004
DG(20:0/20:3(5Z,8Z,11Z)/0:0)	448102	443102	422485	1078972	1159094	1168429	4574251	4601892	4613290	5419920	5520722	5354335	815976	826984	838629	5167002	5230435	5338415	190507	175497	194673	625956	637443	660388	4767327	4809377	4866583	680980	606168	670002	339786	343288	362095	1462244	1471188	1476590	1149767	1221177	1224773	4844258	4481141	4741305	2254033	2253242	2316976	4823953	4840885	4578677	660004
DG(22:0/0:0/18:3n3)	448102	443102	422485	1078972	1159094	1168429	4574251	4601892	4613290	5419920	5520722	5354335	815976	826984	838629	5167002	5230435	5338415	190507	175497	194673	625956	637443	660388	4767327	4809377	4866583	680980	606168	670002	339786	343288	362095	1462244	1471188	1476590	1149767	1221177	1224773	4844258	4481141	4741305	2254033	2253242	2316976	4823953	4840885	4578677	660004
DG(18:1n9/0:0/22:2n6)	448102	443102	422485	1078972	1159094	1168429	4574251	4601892	4613290	5419920	5520722	5354335	815976	826984	838629	5167002	5230435	5338415	190507	175497	194673	625956	637443	660388	4767327	4809377	4866583	680980	606168	670002	339786	343288	362095	1462244	1471188	1476590	1149767	1221177	1224773	4844258	4481141	4741305	2254033	2253242	2316976	4823953	4840885	4578677	660004
DG(20:1n9/0:0/20:2n6)	448102	443102	422485	1078972	1159094	1168429	4574251	4601892	4613290	5419920	5520722	5354335	815976	826984	838629	5167002	5230435	5338415	190507	175497	194673	625956	637443	660388	4767327	4809377	4866583	680980	606168	670002	339786	343288	362095	1462244	1471188	1476590	1149767	1221177	1224773	4844258	4481141	4741305	2254033	2253242	2316976	4823953	4840885	4578677	660004
DG(20:3(8Z,11Z,14Z)/20:0/0:0)	448102	443102	422485	1078972	1159094	1168429	4574251	4601892	4613290	5419920	5520722	5354335	815976	826984	838629	5167002	5230435	5338415	190507	175497	194673	625956	637443	660388	4767327	4809377	4866583	680980	606168	670002	339786	343288	362095	1462244	1471188	1476590	1149767	1221177	1224773	4844258	4481141	4741305	2254033	2253242	2316976	4823953	4840885	4578677	660004
DG(22:1(13Z)/18:2(9Z,12Z)/0:0)	448102	443102	422485	1078972	1159094	1168429	4574251	4601892	4613290	5419920	5520722	5354335	815976	826984	838629	5167002	5230435	5338415	190507	175497	194673	625956	637443	660388	4767327	4809377	4866583	680980	606168	670002	339786	343288	362095	1462244	1471188	1476590	1149767	1221177	1224773	4844258	4481141	4741305	2254033	2253242	2316976	4823953	4840885	4578677	660004
DG(18:3(9Z,12Z,15Z)/22:0/0:0)	448102	443102	422485	1078972	1159094	1168429	4574251	4601892	4613290	5419920	5520722	5354335	815976	826984	838629	5167002	5230435	5338415	190507	175497	194673	625956	637443	660388	4767327	4809377	4866583	680980	606168	670002	339786	343288	362095	1462244	1471188	1476590	1149767	1221177	1224773	4844258	4481141	4741305	2254033	2253242	2316976	4823953	4840885	4578677	660004
DG(18:2(9Z,12Z)/22:1(13Z)/0:0)	448102	443102	422485	1078972	1159094	1168429	4574251	4601892	4613290	5419920	5520722	5354335	815976	826984	838629	5167002	5230435	5338415	190507	175497	194673	625956	637443	660388	4767327	4809377	4866583	680980	606168	670002	339786	343288	362095	1462244	1471188	1476590	1149767	1221177	1224773	4844258	4481141	4741305	2254033	2253242	2316976	4823953	4840885	4578677	660004
DG(20:1(11Z)/20:2(11Z,14Z)/0:0)	448102	443102	422485	1078972	1159094	1168429	4574251	4601892	4613290	5419920	5520722	5354335	815976	826984	838629	5167002	5230435	5338415	190507	175497	194673	625956	637443	660388	4767327	4809377	4866583	680980	606168	670002	339786	343288	362095	1462244	1471188	1476590	1149767	1221177	1224773	4844258	4481141	4741305	2254033	2253242	2316976	4823953	4840885	4578677	660004
PS(14:0/14:0)	1484239	1282844	463124	1456035	921533	267393	1	1	1	1	1	1	1	1	1	1	1	1	195266	1297948	1940068	857575	1264863	1102302	96259	100979	1	1	1	1	99691	1	394941	1268055	1773681	1943837	668165	210505	816700	1	1	1233753	1	457738	880551	1	1	1	1
DG(20:1n9/0:0/20:1n9)	3829453	3811570	3729626	6023094	6264250	6309776	102376	129642	13808531	15685584	46123	31828	5384099	5424664	5507944	13847566	96282	34032	1960680	1911513	1970040	4137038	4196363	4292958	14025787	14052166	14277562	4772452	4389547	4710629	2962143	2973413	3055420	8535358	8598785	8573416	7998132	8212821	8295737	17292246	16750325	17181404	11463007	11735940	11742841	15016847	15255716	14789251	4635117
DG(16:1(9Z)/24:1(15Z)/0:0)	3829453	3811570	3729626	6023094	6264250	6309776	1	1	13808531	15685584	1	1	5384099	5424664	5507944	13847566	1	1	1960680	1911513	1970040	4137038	4196363	4292958	14025787	14052166	14277562	4772452	4389547	4710629	2962143	2973413	3055420	8535358	8598785	8573416	7998132	8212821	8295737	17292246	16750325	17181404	11463007	11735940	11742841	15016847	15255716	14789251	4635117
DG(18:1n9/0:0/22:1n9)	3829453	3811570	3729626	6023094	6264250	6309776	1	1	13808531	15685584	1	1	5384099	5424664	5507944	13847566	1	1	1960680	1911513	1970040	4137038	4196363	4292958	14025787	14052166	14277562	4772452	4389547	4710629	2962143	2973413	3055420	8535358	8598785	8573416	7998132	8212821	8295737	17292246	16750325	17181404	11463007	11735940	11742841	15016847	15255716	14789251	4635117
DG(18:1(9Z)/22:1(13Z)/0:0)	3829453	3811570	3729626	6023094	6264250	6309776	1	1	13808531	15685584	1	1	5384099	5424664	5507944	13847566	1	1	1960680	1911513	1970040	4137038	4196363	4292958	14025787	14052166	14277562	4772452	4389547	4710629	2962143	2973413	3055420	8535358	8598785	8573416	7998132	8212821	8295737	17292246	16750325	17181404	11463007	11735940	11742841	15016847	15255716	14789251	4635117
DG(18:1(11Z)/22:1(13Z)/0:0)	3829453	3811570	3729626	6023094	6264250	6309776	1	1	13808531	15685584	1	1	5384099	5424664	5507944	13847566	1	1	1960680	1911513	1970040	4137038	4196363	4292958	14025787	14052166	14277562	4772452	4389547	4710629	2962143	2973413	3055420	8535358	8598785	8573416	7998132	8212821	8295737	17292246	16750325	17181404	11463007	11735940	11742841	15016847	15255716	14789251	4635117
DG(20:0/0:0/20:2n6)	3829453	3811570	3729626	6023094	6264250	6309776	1	1	13808531	15685584	1	1	5384099	5424664	5507944	13847566	1	1	1960680	1911513	1970040	4137038	4196363	4292958	14025787	14052166	14277562	4772452	4389547	4710629	2962143	2973413	3055420	8535358	8598785	8573416	7998132	8212821	8295737	17292246	16750325	17181404	11463007	11735940	11742841	15016847	15255716	14789251	4635117
DG(18:2(9Z,12Z)/22:0/0:0)	3829453	3811570	3729626	6023094	6264250	6309776	1	1	13808531	15685584	1	1	5384099	5424664	5507944	13847566	1	1	1960680	1911513	1970040	4137038	4196363	4292958	14025787	14052166	14277562	4772452	4389547	4710629	2962143	2973413	3055420	8535358	8598785	8573416	7998132	8212821	8295737	17292246	16750325	17181404	11463007	11735940	11742841	15016847	15255716	14789251	4635117
DG(20:0/20:2(11Z,14Z)/0:0)	3829453	3811570	3729626	6023094	6264250	6309776	1	1	13808531	15685584	1	1	5384099	5424664	5507944	13847566	1	1	1960680	1911513	1970040	4137038	4196363	4292958	14025787	14052166	14277562	4772452	4389547	4710629	2962143	2973413	3055420	8535358	8598785	8573416	7998132	8212821	8295737	17292246	16750325	17181404	11463007	11735940	11742841	15016847	15255716	14789251	4635117
DG(20:1(11Z)/20:1(11Z)/0:0)	3829453	3811570	3729626	6023094	6264250	6309776	1	1	13808531	15685584	1	1	5384099	5424664	5507944	13847566	1	1	1960680	1911513	1970040	4137038	4196363	4292958	14025787	14052166	14277562	4772452	4389547	4710629	2962143	2973413	3055420	8535358	8598785	8573416	7998132	8212821	8295737	17292246	16750325	17181404	11463007	11735940	11742841	15016847	15255716	14789251	4635117
DG(22:1(13Z)/18:1(11Z)/0:0)	3829453	3811570	3729626	6023094	6264250	6309776	1	1	13808531	15685584	1	1	5384099	5424664	5507944	13847566	1	1	1960680	1911513	1970040	4137038	4196363	4292958	14025787	14052166	14277562	4772452	4389547	4710629	2962143	2973413	3055420	8535358	8598785	8573416	7998132	8212821	8295737	17292246	16750325	17181404	11463007	11735940	11742841	15016847	15255716	14789251	4635117
DG(18:1n7/0:0/22:1n9)	3829453	3811570	3729626	6023094	6264250	6309776	1	1	13808531	15685584	1	1	5384099	5424664	5507944	13847566	1	1	1960680	1911513	1970040	4137038	4196363	4292958	14025787	14052166	14277562	4772452	4389547	4710629	2962143	2973413	3055420	8535358	8598785	8573416	7998132	8212821	8295737	17292246	16750325	17181404	11463007	11735940	11742841	15016847	15255716	14789251	4635117
DG(18:0/22:2(13Z,16Z)/0:0)	3829453	3811570	3729626	6023094	6264250	6309776	1	1	13808531	15685584	1	1	5384099	5424664	5507944	13847566	1	1	1960680	1911513	1970040	4137038	4196363	4292958	14025787	14052166	14277562	4772452	4389547	4710629	2962143	2973413	3055420	8535358	8598785	8573416	7998132	8212821	8295737	17292246	16750325	17181404	11463007	11735940	11742841	15016847	15255716	14789251	4635117
DG(20:2(11Z,14Z)/20:0/0:0)	3829453	3811570	3729626	6023094	6264250	6309776	1	1	13808531	15685584	1	1	5384099	5424664	5507944	13847566	1	1	1960680	1911513	1970040	4137038	4196363	4292958	14025787	14052166	14277562	4772452	4389547	4710629	2962143	2973413	3055420	8535358	8598785	8573416	7998132	8212821	8295737	17292246	16750325	17181404	11463007	11735940	11742841	15016847	15255716	14789251	4635117
DG(22:0/18:2(9Z,12Z)/0:0)	3829453	3811570	3729626	6023094	6264250	6309776	1	1	13808531	15685584	1	1	5384099	5424664	5507944	13847566	1	1	1960680	1911513	1970040	4137038	4196363	4292958	14025787	14052166	14277562	4772452	4389547	4710629	2962143	2973413	3055420	8535358	8598785	8573416	7998132	8212821	8295737	17292246	16750325	17181404	11463007	11735940	11742841	15016847	15255716	14789251	4635117
DG(22:1(13Z)/18:1(9Z)/0:0)	3829453	3811570	3729626	6023094	6264250	6309776	1	1	13808531	15685584	1	1	5384099	5424664	5507944	13847566	1	1	1960680	1911513	1970040	4137038	4196363	4292958	14025787	14052166	14277562	4772452	4389547	4710629	2962143	2973413	3055420	8535358	8598785	8573416	7998132	8212821	8295737	17292246	16750325	17181404	11463007	11735940	11742841	15016847	15255716	14789251	4635117
DG(18:0/0:0/22:2n6)	3829453	3811570	3729626	6023094	6264250	6309776	1	1	13808531	15685584	1	1	5384099	5424664	5507944	13847566	1	1	1960680	1911513	1970040	4137038	4196363	4292958	14025787	14052166	14277562	4772452	4389547	4710629	2962143	2973413	3055420	8535358	8598785	8573416	7998132	8212821	8295737	17292246	16750325	17181404	11463007	11735940	11742841	15016847	15255716	14789251	4635117
DG(24:1(15Z)/16:1(9Z)/0:0)	3829453	3811570	3729626	6023094	6264250	6309776	1	1	13808531	15685584	1	1	5384099	5424664	5507944	13847566	1	1	1960680	1911513	1970040	4137038	4196363	4292958	14025787	14052166	14277562	4772452	4389547	4710629	2962143	2973413	3055420	8535358	8598785	8573416	7998132	8212821	8295737	17292246	16750325	17181404	11463007	11735940	11742841	15016847	15255716	14789251	4635117
DG(22:2(13Z,16Z)/18:0/0:0)	3829453	3811570	3729626	6023094	6264250	6309776	1	1	13808531	15685584	1	1	5384099	5424664	5507944	13847566	1	1	1960680	1911513	1970040	4137038	4196363	4292958	14025787	14052166	14277562	4772452	4389547	4710629	2962143	2973413	3055420	8535358	8598785	8573416	7998132	8212821	8295737	17292246	16750325	17181404	11463007	11735940	11742841	15016847	15255716	14789251	4635117
DG(16:1n7/0:0/24:1n9)	3829453	3811570	3729626	6023094	6264250	6309776	1	1	13808531	15685584	1	1	5384099	5424664	5507944	13847566	1	1	1960680	1911513	1970040	4137038	4196363	4292958	14025787	14052166	14277562	4772452	4389547	4710629	2962143	2973413	3055420	8535358	8598785	8573416	7998132	8212821	8295737	17292246	16750325	17181404	11463007	11735940	11742841	15016847	15255716	14789251	4635117
LysoPC(28:1(5Z))	1	1	1	35923	36223	36508	117392	120755	118770	184035	201054	178227	39460	1	34160	193026	180901	185068	1	1	1	1	1	1	121583	135085	133371	1	1	35009	1	1	1	65714	75337	68798	81070	76049	77795	182387	180487	171293	118716	112303	125050	175177	175925	191035	1
PE(15:0/P-16:0)	1	1	1	35923	36223	36508	117392	120755	118770	184035	201054	178227	39460	1	34160	193026	180901	185068	1	1	1	1	1	1	121583	135085	133371	1	1	35009	1	1	1	65714	75337	68798	81070	76049	77795	182387	180487	171293	118716	112303	125050	175177	175925	191035	1
PE(P-16:0/15:0)	1	1	1	35923	36223	36508	117392	120755	118770	184035	201054	178227	39460	1	34160	193026	180901	185068	1	1	1	1	1	1	121583	135085	133371	1	1	35009	1	1	1	65714	75337	68798	81070	76049	77795	182387	180487	171293	118716	112303	125050	175177	175925	191035	1
DG(20:2n6/0:0/22:2n6)	129539	121711	110392	345349	361963	1	1970910	1	2104937	1980973	1911079	1669361	220388	180719	248929	1549348	1	1996303	263308	337548	502209	433612	527661	213118	2308777	357399	2352515	234949	200613	243106	74690	45268	112567	1	597621	601100	333019	1	444070	1829861	1605011	1756313	2279432	2630351	1992960	2033899	2001665	1885232	200935
DG(22:0/0:0/20:4n3)	129539	121711	110392	345349	361963	1	1970910	1	2104937	1980973	1911079	1669361	220388	180719	248929	1549348	1	1996303	263308	337548	502209	1	1	1	1	357399	1	234949	200613	243106	1	1	112567	1	1	1	1	1	1	1	1	1	2279432	2630351	1992960	1	1	1	1
DG(22:0/0:0/20:4n6)	129539	121711	110392	345349	361963	1	1970910	1	2104937	1980973	1911079	1669361	220388	180719	248929	1549348	1	1996303	263308	337548	502209	1	1	1	1	357399	1	234949	200613	243106	1	1	112567	1	1	1	1	1	1	1	1	1	2279432	2630351	1992960	1	1	1	1
DG(20:4(8Z,11Z,14Z,17Z)/22:0/0:0)	129539	121711	110392	345349	361963	1	1970910	1	2104937	1980973	1911079	1669361	220388	180719	248929	1549348	1	1996303	263308	337548	502209	1	1	1	1	357399	1	234949	200613	243106	1	1	112567	1	1	1	1	1	1	1	1	1	2279432	2630351	1992960	1	1	1	1
DG(18:3(9Z,12Z,15Z)/24:1(15Z)/0:0)	129539	121711	110392	345349	361963	1	1970910	1	2104937	1980973	1911079	1669361	220388	180719	248929	1549348	1	1996303	263308	337548	502209	1	1	1	1	357399	1	234949	200613	243106	1	1	112567	1	1	1	1	1	1	1	1	1	2279432	2630351	1992960	1	1	1	1
DG(20:3(8Z,11Z,14Z)/22:1(13Z)/0:0)	129539	121711	110392	345349	361963	1	1970910	1	2104937	1980973	1911079	1669361	220388	180719	248929	1549348	1	1996303	263308	337548	502209	1	1	1	1	357399	1	234949	200613	243106	1	1	112567	1	1	1	1	1	1	1	1	1	2279432	2630351	1992960	1	1	1	1
DG(20:4(5Z,8Z,11Z,14Z)/22:0/0:0)	129539	121711	110392	345349	361963	1	1970910	1	2104937	1980973	1911079	1669361	220388	180719	248929	1549348	1	1996303	263308	337548	502209	1	1	1	1	357399	1	234949	200613	243106	1	1	112567	1	1	1	1	1	1	1	1	1	2279432	2630351	1992960	1	1	1	1
DG(24:1n9/0:0/18:3n6)	129539	121711	110392	345349	361963	1	1970910	1	2104937	1980973	1911079	1669361	220388	180719	248929	1549348	1	1996303	263308	337548	502209	1	1	1	1	357399	1	234949	200613	243106	1	1	112567	1	1	1	1	1	1	1	1	1	2279432	2630351	1992960	1	1	1	1
DG(18:3(6Z,9Z,12Z)/24:1(15Z)/0:0)	129539	121711	110392	345349	361963	1	1970910	1	2104937	1980973	1911079	1669361	220388	180719	248929	1549348	1	1996303	263308	337548	502209	1	1	1	1	357399	1	234949	200613	243106	1	1	112567	1	1	1	1	1	1	1	1	1	2279432	2630351	1992960	1	1	1	1
DG(22:1(13Z)/20:3(5Z,8Z,11Z)/0:0)	129539	121711	110392	345349	361963	1	1970910	1	2104937	1980973	1911079	1669361	220388	180719	248929	1549348	1	1996303	263308	337548	502209	1	1	1	1	357399	1	234949	200613	243106	1	1	112567	1	1	1	1	1	1	1	1	1	2279432	2630351	1992960	1	1	1	1
DG(24:1n9/0:0/18:3n3)	129539	121711	110392	345349	361963	1	1970910	1	2104937	1980973	1911079	1669361	220388	180719	248929	1549348	1	1996303	263308	337548	502209	1	1	1	1	357399	1	234949	200613	243106	1	1	112567	1	1	1	1	1	1	1	1	1	2279432	2630351	1992960	1	1	1	1
DG(22:2(13Z,16Z)/20:2(11Z,14Z)/0:0)	129539	121711	110392	345349	361963	1	1970910	1	2104937	1980973	1911079	1669361	220388	180719	248929	1549348	1	1996303	263308	337548	502209	1	1	1	1	357399	1	234949	200613	243106	1	1	112567	1	1	1	1	1	1	1	1	1	2279432	2630351	1992960	1	1	1	1
DG(20:3(5Z,8Z,11Z)/22:1(13Z)/0:0)	129539	121711	110392	345349	361963	1	1970910	1	2104937	1980973	1911079	1669361	220388	180719	248929	1549348	1	1996303	263308	337548	502209	1	1	1	1	357399	1	234949	200613	243106	1	1	112567	1	1	1	1	1	1	1	1	1	2279432	2630351	1992960	1	1	1	1
DG(22:0/20:4(5Z,8Z,11Z,14Z)/0:0)	129539	121711	110392	345349	361963	1	1970910	1	2104937	1980973	1911079	1669361	220388	180719	248929	1549348	1	1996303	263308	337548	502209	1	1	1	1	357399	1	234949	200613	243106	1	1	112567	1	1	1	1	1	1	1	1	1	2279432	2630351	1992960	1	1	1	1
DG(22:4(7Z,10Z,13Z,16Z)/20:0/0:0)	129539	121711	110392	345349	361963	1	1970910	1	2104937	1980973	1911079	1669361	220388	180719	248929	1549348	1	1996303	263308	337548	502209	1	1	1	1	357399	1	234949	200613	243106	1	1	112567	1	1	1	1	1	1	1	1	1	2279432	2630351	1992960	1	1	1	1
DG(20:2(11Z,14Z)/22:2(13Z,16Z)/0:0)	129539	121711	110392	345349	361963	1	1970910	1	2104937	1980973	1911079	1669361	220388	180719	248929	1549348	1	1996303	263308	337548	502209	1	1	1	1	357399	1	234949	200613	243106	1	1	112567	1	1	1	1	1	1	1	1	1	2279432	2630351	1992960	1	1	1	1
DG(22:0/20:4(8Z,11Z,14Z,17Z)/0:0)	129539	121711	110392	345349	361963	1	1970910	1	2104937	1980973	1911079	1669361	220388	180719	248929	1549348	1	1996303	263308	337548	502209	1	1	1	1	357399	1	234949	200613	243106	1	1	112567	1	1	1	1	1	1	1	1	1	2279432	2630351	1992960	1	1	1	1
DG(24:1(15Z)/18:3(9Z,12Z,15Z)/0:0)	129539	121711	110392	345349	361963	1	1970910	1	2104937	1980973	1911079	1669361	220388	180719	248929	1549348	1	1996303	263308	337548	502209	1	1	1	1	357399	1	234949	200613	243106	1	1	112567	1	1	1	1	1	1	1	1	1	2279432	2630351	1992960	1	1	1	1
DG(20:0/22:4(7Z,10Z,13Z,16Z)/0:0)	129539	121711	110392	345349	361963	1	1970910	1	2104937	1980973	1911079	1669361	220388	180719	248929	1549348	1	1996303	263308	337548	502209	1	1	1	1	357399	1	234949	200613	243106	1	1	112567	1	1	1	1	1	1	1	1	1	2279432	2630351	1992960	1	1	1	1
DG(18:4(6Z,9Z,12Z,15Z)/24:0/0:0)	129539	121711	110392	345349	361963	1	1970910	1	2104937	1980973	1911079	1669361	220388	180719	248929	1549348	1	1996303	263308	337548	502209	1	1	1	1	357399	1	234949	200613	243106	1	1	112567	1	1	1	1	1	1	1	1	1	2279432	2630351	1992960	1	1	1	1
DG(22:1(13Z)/20:3(8Z,11Z,14Z)/0:0)	129539	121711	110392	345349	361963	1	1970910	1	2104937	1980973	1911079	1669361	220388	180719	248929	1549348	1	1996303	263308	337548	502209	1	1	1	1	357399	1	234949	200613	243106	1	1	112567	1	1	1	1	1	1	1	1	1	2279432	2630351	1992960	1	1	1	1
DG(20:3n9/0:0/22:1n9)	129539	121711	110392	345349	361963	1	1970910	1	2104937	1980973	1911079	1669361	220388	180719	248929	1549348	1	1996303	263308	337548	502209	1	1	1	1	357399	1	234949	200613	243106	1	1	112567	1	1	1	1	1	1	1	1	1	2279432	2630351	1992960	1	1	1	1
DG(24:0/18:4(6Z,9Z,12Z,15Z)/0:0)	129539	121711	110392	345349	361963	1	1970910	1	2104937	1980973	1911079	1669361	220388	180719	248929	1549348	1	1996303	263308	337548	502209	1	1	1	1	357399	1	234949	200613	243106	1	1	112567	1	1	1	1	1	1	1	1	1	2279432	2630351	1992960	1	1	1	1
DG(22:1n9/0:0/20:3n6)	129539	121711	110392	345349	361963	1	1970910	1	2104937	1980973	1911079	1669361	220388	180719	248929	1549348	1	1996303	263308	337548	502209	1	1	1	1	357399	1	234949	200613	243106	1	1	112567	1	1	1	1	1	1	1	1	1	2279432	2630351	1992960	1	1	1	1
DG(20:0/0:0/22:4n6)	129539	121711	110392	345349	361963	1	1970910	1	2104937	1980973	1911079	1669361	220388	180719	248929	1549348	1	1996303	263308	337548	502209	1	1	1	1	357399	1	234949	200613	243106	1	1	112567	1	1	1	1	1	1	1	1	1	2279432	2630351	1992960	1	1	1	1
DG(24:0/0:0/18:4n3)	129539	121711	110392	345349	361963	1	1970910	1	2104937	1980973	1911079	1669361	220388	180719	248929	1549348	1	1996303	263308	337548	502209	1	1	1	1	357399	1	234949	200613	243106	1	1	112567	1	1	1	1	1	1	1	1	1	2279432	2630351	1992960	1	1	1	1
DG(24:1(15Z)/18:3(6Z,9Z,12Z)/0:0)	129539	121711	110392	345349	361963	1	1970910	1	2104937	1980973	1911079	1669361	220388	180719	248929	1549348	1	1996303	263308	337548	502209	1	1	1	1	357399	1	234949	200613	243106	1	1	112567	1	1	1	1	1	1	1	1	1	2279432	2630351	1992960	1	1	1	1
DG(22:0/0:0/18:1n7)	603920	599897	565820	2075607	2212129	2150938	4469796	4767189	4644892	3210851	2831268	3071613	966887	883502	983598	4313355	4717366	4903944	621873	607042	631808	2033701	2047080	2059580	3343966	3268074	3439752	1626362	1513237	1635093	686422	706974	715861	1671340	1732171	1745065	1835030	1908297	1904697	2517264	2373686	2479124	3397231	3403253	3420724	2724444	2609465	2454963	1106290
DG(24:0/0:0/16:1n7)	603920	599897	565820	2075607	2212129	2150938	4469796	4767189	4644892	3210851	2831268	3071613	966887	883502	983598	4313355	4717366	4903944	621873	607042	631808	2033701	2047080	2059580	3343966	3268074	3439752	1626362	1513237	1635093	686422	706974	715861	1671340	1732171	1745065	1835030	1908297	1904697	2517264	2373686	2479124	3397231	3403253	3420724	2724444	2609465	2454963	1106290
DG(22:0/0:0/18:1n9)	603920	599897	565820	2075607	2212129	2150938	4469796	4767189	4644892	3210851	2831268	3071613	966887	883502	983598	4313355	4717366	4903944	621873	607042	631808	2033701	2047080	2059580	3343966	3268074	3439752	1626362	1513237	1635093	686422	706974	715861	1671340	1732171	1745065	1835030	1908297	1904697	2517264	2373686	2479124	3397231	3403253	3420724	2724444	2609465	2454963	1106290
DG(22:1(13Z)/18:0/0:0)	603920	599897	565820	2075607	2212129	2150938	4469796	4767189	4644892	3210851	2831268	3071613	966887	883502	983598	4313355	4717366	4903944	621873	607042	631808	2033701	2047080	2059580	3343966	3268074	3439752	1626362	1513237	1635093	686422	706974	715861	1671340	1732171	1745065	1835030	1908297	1904697	2517264	2373686	2479124	3397231	3403253	3420724	2724444	2609465	2454963	1106290
DG(20:0/20:1(11Z)/0:0)	603920	599897	565820	2075607	2212129	2150938	4469796	4767189	4644892	3210851	2831268	3071613	966887	883502	983598	4313355	4717366	4903944	621873	607042	631808	2033701	2047080	2059580	3343966	3268074	3439752	1626362	1513237	1635093	686422	706974	715861	1671340	1732171	1745065	1835030	1908297	1904697	2517264	2373686	2479124	3397231	3403253	3420724	2724444	2609465	2454963	1106290
DG(18:1(9Z)/22:0/0:0)	603920	599897	565820	2075607	2212129	2150938	4469796	4767189	4644892	3210851	2831268	3071613	966887	883502	983598	4313355	4717366	4903944	621873	607042	631808	2033701	2047080	2059580	3343966	3268074	3439752	1626362	1513237	1635093	686422	706974	715861	1671340	1732171	1745065	1835030	1908297	1904697	2517264	2373686	2479124	3397231	3403253	3420724	2724444	2609465	2454963	1106290
DG(22:0/18:1(11Z)/0:0)	603920	599897	565820	2075607	2212129	2150938	4469796	4767189	4644892	3210851	2831268	3071613	966887	883502	983598	4313355	4717366	4903944	621873	607042	631808	2033701	2047080	2059580	3343966	3268074	3439752	1626362	1513237	1635093	686422	706974	715861	1671340	1732171	1745065	1835030	1908297	1904697	2517264	2373686	2479124	3397231	3403253	3420724	2724444	2609465	2454963	1106290
DG(16:1(9Z)/24:0/0:0)	603920	599897	565820	2075607	2212129	2150938	4469796	4767189	4644892	3210851	2831268	3071613	966887	883502	983598	4313355	4717366	4903944	621873	607042	631808	2033701	2047080	2059580	3343966	3268074	3439752	1626362	1513237	1635093	686422	706974	715861	1671340	1732171	1745065	1835030	1908297	1904697	2517264	2373686	2479124	3397231	3403253	3420724	2724444	2609465	2454963	1106290
DG(22:0/18:1(9Z)/0:0)	603920	599897	565820	2075607	2212129	2150938	4469796	4767189	4644892	3210851	2831268	3071613	966887	883502	983598	4313355	4717366	4903944	621873	607042	631808	2033701	2047080	2059580	3343966	3268074	3439752	1626362	1513237	1635093	686422	706974	715861	1671340	1732171	1745065	1835030	1908297	1904697	2517264	2373686	2479124	3397231	3403253	3420724	2724444	2609465	2454963	1106290
DG(18:1(11Z)/22:0/0:0)	603920	599897	565820	2075607	2212129	2150938	4469796	4767189	4644892	3210851	2831268	3071613	966887	883502	983598	4313355	4717366	4903944	621873	607042	631808	2033701	2047080	2059580	3343966	3268074	3439752	1626362	1513237	1635093	686422	706974	715861	1671340	1732171	1745065	1835030	1908297	1904697	2517264	2373686	2479124	3397231	3403253	3420724	2724444	2609465	2454963	1106290
DG(16:0/0:0/24:1n9)	603920	599897	565820	2075607	2212129	2150938	4469796	4767189	4644892	3210851	2831268	3071613	966887	883502	983598	4313355	4717366	4903944	621873	607042	631808	2033701	2047080	2059580	3343966	3268074	3439752	1626362	1513237	1635093	686422	706974	715861	1671340	1732171	1745065	1835030	1908297	1904697	2517264	2373686	2479124	3397231	3403253	3420724	2724444	2609465	2454963	1106290
DG(20:0/0:0/20:1n9)	603920	599897	565820	2075607	2212129	2150938	4469796	4767189	4644892	3210851	2831268	3071613	966887	883502	983598	4313355	4717366	4903944	621873	607042	631808	2033701	2047080	2059580	3343966	3268074	3439752	1626362	1513237	1635093	686422	706974	715861	1671340	1732171	1745065	1835030	1908297	1904697	2517264	2373686	2479124	3397231	3403253	3420724	2724444	2609465	2454963	1106290
DG(18:0/22:1(13Z)/0:0)	603920	599897	565820	2075607	2212129	2150938	4469796	4767189	4644892	3210851	2831268	3071613	966887	883502	983598	4313355	4717366	4903944	621873	607042	631808	2033701	2047080	2059580	3343966	3268074	3439752	1626362	1513237	1635093	686422	706974	715861	1671340	1732171	1745065	1835030	1908297	1904697	2517264	2373686	2479124	3397231	3403253	3420724	2724444	2609465	2454963	1106290
DG(24:0/16:1(9Z)/0:0)	603920	599897	565820	2075607	2212129	2150938	4469796	4767189	4644892	3210851	2831268	3071613	966887	883502	983598	4313355	4717366	4903944	621873	607042	631808	2033701	2047080	2059580	3343966	3268074	3439752	1626362	1513237	1635093	686422	706974	715861	1671340	1732171	1745065	1835030	1908297	1904697	2517264	2373686	2479124	3397231	3403253	3420724	2724444	2609465	2454963	1106290
DG(20:1(11Z)/20:0/0:0)	603920	599897	565820	2075607	2212129	2150938	4469796	4767189	4644892	3210851	2831268	3071613	966887	883502	983598	4313355	4717366	4903944	621873	607042	631808	2033701	2047080	2059580	3343966	3268074	3439752	1626362	1513237	1635093	686422	706974	715861	1671340	1732171	1745065	1835030	1908297	1904697	2517264	2373686	2479124	3397231	3403253	3420724	2724444	2609465	2454963	1106290
DG(16:0/24:1(15Z)/0:0)	603920	599897	565820	2075607	2212129	2150938	4469796	4767189	4644892	3210851	2831268	3071613	966887	883502	983598	4313355	4717366	4903944	621873	607042	631808	2033701	2047080	2059580	3343966	3268074	3439752	1626362	1513237	1635093	686422	706974	715861	1671340	1732171	1745065	1835030	1908297	1904697	2517264	2373686	2479124	3397231	3403253	3420724	2724444	2609465	2454963	1106290
DG(18:0/0:0/22:1n9)	603920	599897	565820	2075607	2212129	2150938	4469796	4767189	4644892	3210851	2831268	3071613	966887	883502	983598	4313355	4717366	4903944	621873	607042	631808	2033701	2047080	2059580	3343966	3268074	3439752	1626362	1513237	1635093	686422	706974	715861	1671340	1732171	1745065	1835030	1908297	1904697	2517264	2373686	2479124	3397231	3403253	3420724	2724444	2609465	2454963	1106290
DG(24:1(15Z)/16:0/0:0)	603920	599897	565820	2075607	2212129	2150938	4469796	4767189	4644892	3210851	2831268	3071613	966887	883502	983598	4313355	4717366	4903944	621873	607042	631808	2033701	2047080	2059580	3343966	3268074	3439752	1626362	1513237	1635093	686422	706974	715861	1671340	1732171	1745065	1835030	1908297	1904697	2517264	2373686	2479124	3397231	3403253	3420724	2724444	2609465	2454963	1106290
DG(20:0/0:0/18:2n6)	165830	160916	150588	284896	306481	318720	1098646	1115285	1135628	2012713	2062727	1997854	237155	237704	249577	1881957	1860288	1925117	1	1	1	168101	178907	180355	1322758	1344091	1360922	187113	166685	193594	1	1	1	464758	485263	481427	608335	630838	645684	1988387	1800943	1952808	995357	991333	1022332	1526572	1524553	1431532	172803
PE(18:0/P-16:0)	421123	383747	285984	1	1	1	1	1	1	570776	604749	570434	1	1	1	800707	747595	779635	1	1	1	1	1	1	784819	830817	794878	1	1	1	1	1	1	126470	141147	154328	1	1	1	589753	497276	556042	200871	193150	210716	622034	632184	576426	1
PE(P-16:0/18:0)	421123	383747	285984	1	1	1	1	1	1	570776	604749	570434	1	1	1	800707	747595	779635	1	1	1	1	1	1	784819	830817	794878	1	1	1	1	1	1	126470	141147	154328	1	1	1	589753	497276	556042	200871	193150	210716	622034	632184	576426	1
PE(P-18:0/16:0)	421123	383747	285984	1	1	1	666754	653745	668502	570776	604749	570434	1	1	1	800707	747595	779635	1	1	1	1	1	1	784819	830817	794878	1	1	1	1	1	1	126470	141147	154328	1	1	1	589753	497276	556042	200871	193150	210716	622034	632184	576426	1
PE(16:0/P-18:0)	421123	383747	285984	1	1	1	1	1	1	570776	604749	570434	1	1	1	800707	747595	779635	1	1	1	1	1	1	784819	830817	794878	1	1	1	1	1	1	126470	141147	154328	1	1	1	589753	497276	556042	200871	193150	210716	622034	632184	576426	1
PC(15:0/P-16:0)	421123	383747	285984	1	1	1	1	1	1	570776	604749	570434	1	1	1	800707	747595	779635	1	1	1	1	1	1	784819	830817	794878	1	1	1	1	1	1	126470	141147	154328	1	1	1	589753	497276	556042	200871	193150	210716	622034	632184	576426	1
PC(P-16:0/15:0)	421123	383747	285984	1	1	1	1	1	1	570776	604749	570434	1	1	1	800707	747595	779635	1	1	1	1	1	1	784819	830817	794878	1	1	1	1	1	1	126470	141147	154328	1	1	1	589753	497276	556042	200871	193150	210716	622034	632184	576426	1
PE(P-16:0e/18:1(9Z))	421123	383747	285984	1	1	1	1	1	1	570776	604749	570434	1	1	1	800707	747595	779635	1	1	1	1	1	1	784819	830817	794878	1	1	1	1	1	1	126470	141147	154328	1	1	1	589753	497276	556042	200871	193150	210716	622034	632184	576426	1
CE(MonoMe(11,5))	1	1	1	1	1	69892	1	1	1170440	1	1	1	1	1	1	1	1	1	1	1	1	1	1	1	432541	870284	433543	1	1	1	1	1	1	452214	102904	192125	1	1	1	1059917	2145680	2101446	1282943	442484	1295236	568648	1	1	1
PC(o-16:1(9Z)/14:1(9Z))	1	1	1	1	1	1	55234	54293	53743	54987	64575	62147	1	1	1	62598	61013	39767	1	1	1	1	1	1	56693	63033	64361	1	1	1	1	1	1	1	1	1	1	1	1	62862	60102	55127	1	1	1	66936	70847	72580	1
PE(15:0/P-18:1(9Z))	1	1	1	1	1	1	1	1	1	54987	64575	62147	1	1	1	62598	61013	39767	1	1	1	1	1	1	56693	63033	64361	1	1	1	1	1	1	1	1	1	1	1	1	62862	60102	55127	1	1	1	66936	70847	72580	1
PE(15:0/P-18:1(11Z))	1	1	1	1	1	1	1	1	1	54987	64575	62147	1	1	1	62598	61013	39767	1	1	1	1	1	1	56693	63033	64361	1	1	1	1	1	1	1	1	1	1	1	1	62862	60102	55127	1	1	1	66936	70847	72580	1
PC(14:1(9Z)/P-16:0)	1	1	1	1	1	1	1	1	1	54987	64575	62147	1	1	1	62598	61013	39767	1	1	1	1	1	1	56693	63033	64361	1	1	1	1	1	1	1	1	1	1	1	1	62862	60102	55127	1	1	1	66936	70847	72580	1
PC(P-16:0/14:1(9Z))	1	1	1	1	1	1	1	1	1	54987	64575	62147	1	1	1	62598	61013	39767	1	1	1	1	1	1	56693	63033	64361	1	1	1	1	1	1	1	1	1	1	1	1	62862	60102	55127	1	1	1	66936	70847	72580	1
PE(P-18:1(11Z)/15:0)	1	1	1	1	1	1	1	1	1	54987	64575	62147	1	1	1	62598	61013	39767	1	1	1	1	1	1	56693	63033	64361	1	1	1	1	1	1	1	1	1	1	1	1	62862	60102	55127	1	1	1	66936	70847	72580	1
PE(P-18:1(9Z)/15:0)	1	1	1	1	1	1	1	1	1	54987	64575	62147	1	1	1	62598	61013	39767	1	1	1	1	1	1	56693	63033	64361	1	1	1	1	1	1	1	1	1	1	1	1	62862	60102	55127	1	1	1	66936	70847	72580	1
PE(18:0/15:0)	1	1	1	1	1	1	1	1	1	1	1	1	1	1	1	1	1	1	1	1	1	1	1	1	64701	71649	71838	1	1	1	1	1	1	1	1	1	1	1	1	1	1	1	1	1	1	1	1	1	1
PC(14:0/16:0)	1	1	1	1	1	1	1	1	1	1	1	1	1	1	1	1	1	1	1	1	1	1	1	1	64701	71649	71838	1	1	1	1	1	1	1	1	1	1	1	1	1	1	1	1	1	1	1	1	1	1
PC(12:0/18:0)	1	1	1	1	1	1	1	1	1	1	1	1	1	1	1	1	1	1	1	1	1	1	1	1	64701	71649	71838	1	1	1	1	1	1	1	1	1	1	1	1	1	1	1	1	1	1	1	1	1	1
PC(18:0/12:0)	1	1	1	1	1	1	1	1	1	1	1	1	1	1	1	1	1	1	1	1	1	1	1	1	64701	71649	71838	1	1	1	1	1	1	1	1	1	1	1	1	1	1	1	1	1	1	1	1	1	1
PC(20:0/10:0)	1	1	1	1	1	1	1	1	1	1	1	1	1	1	1	1	1	1	1	1	1	1	1	1	64701	71649	71838	1	1	1	1	1	1	1	1	1	1	1	1	1	1	1	1	1	1	1	1	1	1
PC(13:0/17:0)	1	1	1	1	1	1	1	1	1	1	1	1	1	1	1	1	1	1	1	1	1	1	1	1	64701	71649	71838	1	1	1	1	1	1	1	1	1	1	1	1	1	1	1	1	1	1	1	1	1	1
PC(16:0/14:0)	1	1	1	1	1	1	1	1	1	1	1	1	1	1	1	1	1	1	1	1	1	1	1	1	64701	71649	71838	1	1	1	1	1	1	1	1	1	1	1	1	1	1	1	1	1	1	1	1	1	1
PE-NMe(16:0/16:0)	1	1	1	1	1	1	1	1	1	1	1	1	1	1	1	1	1	1	1	1	1	1	1	1	64701	71649	71838	1	1	1	1	1	1	1	1	1	1	1	1	1	1	1	1	1	1	1	1	1	1
PC(17:0/13:0)	1	1	1	1	1	1	1	1	1	1	1	1	1	1	1	1	1	1	1	1	1	1	1	1	64701	71649	71838	1	1	1	1	1	1	1	1	1	1	1	1	1	1	1	1	1	1	1	1	1	1
PC(11:0/19:0)	1	1	1	1	1	1	1	1	1	1	1	1	1	1	1	1	1	1	1	1	1	1	1	1	64701	71649	71838	1	1	1	1	1	1	1	1	1	1	1	1	1	1	1	1	1	1	1	1	1	1
PC(19:0/11:0)	1	1	1	1	1	1	1	1	1	1	1	1	1	1	1	1	1	1	1	1	1	1	1	1	64701	71649	71838	1	1	1	1	1	1	1	1	1	1	1	1	1	1	1	1	1	1	1	1	1	1
PC(10:0/20:0)	1	1	1	1	1	1	1	1	1	1	1	1	1	1	1	1	1	1	1	1	1	1	1	1	64701	71649	71838	1	1	1	1	1	1	1	1	1	1	1	1	1	1	1	1	1	1	1	1	1	1
PE(15:0/18:0)	1	1	1	1	1	1	1	1	1	1	1	1	1	1	1	1	1	1	1	1	1	1	1	1	64701	71649	71838	1	1	1	1	1	1	1	1	1	1	1	1	1	1	1	1	1	1	1	1	1	1
PC(15:0/15:0)	1	1	1	1	1	1	1	1	1	1	1	1	1	1	1	1	1	1	1	1	1	1	1	1	64701	71649	71838	1	1	1	1	1	1	1	1	1	1	1	1	1	1	1	1	1	1	1	1	1	1
PS(14:0/16:0)	1	1	1	1	1	1	1	1	1	1	1	1	1	1	1	1	1	1	1	1	1	1	1	1	1	1	1	1	1	1	1	1	1	1	1	1	1	1	1	1	1	1	1	1	1	1	1	1	1
PS(16:0/14:0)	1	1	1	1	1	1	1	1	1	1	1	1	1	1	1	1	1	1	1	1	1	1	1	1	1	1	1	1	1	1	1	1	1	1	1	1	1	1	1	1	1	1	1	1	1	1	1	1	1
PE(18:3(6Z,9Z,12Z)/14:0)	1	1	1	1	1	1	1	1	1	1	1	1	1	1	1	1	1	1	1	1	1	1	1	1	1	1	1	1	1	1	1	1	1	1	1	1	1	1	1	1	1	1	1	1	1	1	1	1	1
PE(18:3(9Z,12Z,15Z)/14:0)	1	1	1	1	1	1	1	1	1	1	1	1	1	1	1	1	1	1	1	1	1	1	1	1	1	1	1	1	1	1	1	1	1	1	1	1	1	1	1	1	1	1	1	1	1	1	1	1	1
PE(14:1(9Z)/18:2(9Z,12Z))	1	1	1	1	1	1	1	1	1	1	1	1	1	1	1	1	1	1	1	1	1	1	1	1	1	1	1	1	1	1	1	1	1	1	1	1	1	1	1	1	1	1	1	1	1	1	1	1	1
PE(18:2(9Z,12Z)/14:1(9Z))	1	1	1	1	1	1	1	1	1	1	1	1	1	1	1	1	1	1	1	1	1	1	1	1	1	1	1	1	1	1	1	1	1	1	1	1	1	1	1	1	1	1	1	1	1	1	1	1	1
PE(14:0/18:3(9Z,12Z,15Z))	1	1	1	1	1	1	1	1	1	1	1	1	1	1	1	1	1	1	1	1	1	1	1	1	1	1	1	1	1	1	1	1	1	1	1	1	1	1	1	1	1	1	1	1	1	1	1	1	1
PE(14:0/18:3(6Z,9Z,12Z))	1	1	1	1	1	1	1	1	1	1	1	1	1	1	1	1	1	1	1	1	1	1	1	1	1	1	1	1	1	1	1	1	1	1	1	1	1	1	1	1	1	1	1	1	1	1	1	1	1
PC(o-16:0/14:1(9Z))	1	1	1	82836	81284	82110	191068	187550	193477	303057	313551	291950	1	1	1	304128	298273	307934	1	1	1	54344	55407	55593	216142	211926	212892	73605	82035	78359	1	1	1	138638	140891	154707	163768	138502	143723	368243	325413	336864	215322	199943	225825	319381	310517	319448	86971
PC(o-14:0/16:1(9Z))	1	1	1	1	1	1	1	1	1	303057	313551	291950	1	1	1	304128	298273	307934	1	1	1	54344	55407	55593	216142	211926	212892	73605	82035	78359	1	1	1	138638	140891	154707	163768	138502	143723	368243	325413	336864	215322	199943	225825	319381	310517	319448	86971
PC(14:0/P-16:0)	1	1	1	1	1	1	1	1	1	303057	313551	291950	1	1	1	304128	298273	307934	1	1	1	54344	55407	55593	216142	211926	212892	73605	82035	78359	1	1	1	138638	140891	154707	163768	138502	143723	368243	325413	336864	215322	199943	225825	319381	310517	319448	86971
PE(P-18:0/15:0)	1	1	1	1	1	1	1	1	1	303057	313551	291950	1	1	1	304128	298273	307934	1	1	1	54344	55407	55593	216142	211926	212892	73605	82035	78359	1	1	1	138638	140891	154707	163768	138502	143723	368243	325413	336864	215322	199943	225825	319381	310517	319448	86971
PE(15:0/P-18:0)	1	1	1	1	1	1	1	1	1	303057	313551	291950	1	1	1	304128	298273	307934	1	1	1	54344	55407	55593	216142	211926	212892	73605	82035	78359	1	1	1	138638	140891	154707	163768	138502	143723	368243	325413	336864	215322	199943	225825	319381	310517	319448	86971
PC(P-16:0/14:0)	1	1	1	1	1	1	1	1	1	303057	313551	291950	1	1	1	304128	298273	307934	1	1	1	54344	55407	55593	216142	211926	212892	73605	82035	78359	1	1	1	138638	140891	154707	163768	138502	143723	368243	325413	336864	215322	199943	225825	319381	310517	319448	86971
SM(d16:0/17:1(10Z))	297602	313968	248658	615795	655474	540006	1	475629	1	1	1	1	1	1	1	1	1	1	380213	369097	427885	862328	826694	862368	420079	1	479782	524997	608422	544603	329528	371753	434086	399410	501133	560086	598880	524610	1	1	1	1	677704	759721	678181	1	138442	1	112425
PC(O-18:0/12:0)	1	1	1	1	1	1	1	1	1	1	1	1	1	1	1	1	1	1	1	1	1	1	1	1	1	1	1	1	1	1	1	1	1	1	1	1	1	1	1	1	1	1	1	1	1	1	1	1	1
PC(o-14:0/16:0)	1	1	1	1	1	1	1	1	1	1	1	1	1	1	1	1	1	1	1	1	1	1	1	1	1	1	1	1	1	1	1	1	1	1	1	1	1	1	1	1	1	1	1	1	1	1	1	1	1
PC(O-16:0/14:0)	1	1	1	1	1	1	1	1	1	1	1	1	1	1	1	1	1	1	1	1	1	1	1	1	1	1	1	1	1	1	1	1	1	1	1	1	1	1	1	1	1	1	1	1	1	1	1	1	1
DG(22:1n9/0:0/18:2n6)	1	1	1	1	1	1	1	1	1	205934	225013	201538	1	1	1	215595	214821	223870	1	1	1	1	1	1	1	1	1	1	1	1	1	1	1	55953	66897	68669	58040	64920	66466	140747	122861	135014	102316	109759	114867	1	1	1	1
CE(DiMe(11,3))	1	1	1	1	1	1	1	1	1	1	1	1	1	1	1	1	1	1	1	1	1	1	1	1	1	1	1	1	1	1	1	1	1	1	1	1	1	1	1	1	1	1	1	1	1	1	1	1	1
CE(DiMe(9,5))	1	1	1	1	1	1	1	1	1	1	1	1	1	1	1	1	1	1	1	1	1	1	1	1	1	1	1	1	1	1	1	1	1	1	1	1	1	1	1	1	1	1	1	1	1	1	1	1	1
CE(20:4(5Z,8Z,11Z,14Z))	1	1	1	1	1	1	39462	52263	46448	79893	83643	77043	1	1	1	66710	61531	65090	1	1	1	1	1	1	61048	57524	64828	1	1	1	1	1	1	1	1	1	1	1	1	74838	60832	80274	1	1	1	54436	55261	52811	1
CE(20:4(8Z,11Z,14Z,17Z))	1	1	1	1	1	1	39462	52263	46448	79893	83643	77043	1	1	1	66710	61531	65090	1	1	1	1	1	1	61048	57524	64828	1	1	1	1	1	1	1	1	1	1	1	1	74838	60832	80274	1	1	1	54436	55261	52811	1
DG(22:6(4Z,7Z,10Z,13Z,16Z,19Z)/22:6(4Z,7Z,10Z,13Z,16Z,19Z)/0:0)	1	1	1	1	1	1	1	1	1	1	1	1	1	1	1	1	1	1	1	1	1	1	1	1	1	1	1	1	1	1	1	1	1	1	1	1	1	1	1	1	1	1	1	1	1	187451	193943	176609	1
DG(22:6n3/0:0/22:6n3)	1	1	1	1	1	1	1	1	1	1	1	1	1	1	1	1	1	1	1	1	1	1	1	1	1	1	1	1	1	1	1	1	1	1	1	1	1	1	1	1	1	1	1	1	1	187451	193943	176609	1
DG(22:5(7Z,10Z,13Z,16Z,19Z)/22:6(4Z,7Z,10Z,13Z,16Z,19Z)/0:0)	1	1	1	1	1	1	1	1	1	1	1	1	1	1	1	1	1	1	1	1	1	1	1	1	1	1	1	1	1	1	1	1	1	1	1	1	1	1	1	1	1	1	1	1	1	89761	152446	153445	1
DG(22:5(4Z,7Z,10Z,13Z,16Z)/22:6(4Z,7Z,10Z,13Z,16Z,19Z)/0:0)	1	1	1	1	1	1	1	1	1	1	1	1	1	1	1	1	1	1	1	1	1	1	1	1	1	1	1	1	1	1	1	1	1	1	1	1	1	1	1	1	1	1	1	1	1	89761	152446	153445	1
DG(22:6(4Z,7Z,10Z,13Z,16Z,19Z)/22:5(7Z,10Z,13Z,16Z,19Z)/0:0)	1	1	1	1	1	1	1	1	1	1	1	1	1	1	1	1	1	1	1	1	1	1	1	1	1	1	1	1	1	1	1	1	1	1	1	1	1	1	1	1	1	1	1	1	1	89761	152446	153445	1
DG(22:6(4Z,7Z,10Z,13Z,16Z,19Z)/22:5(4Z,7Z,10Z,13Z,16Z)/0:0)	1	1	1	1	1	1	1	1	1	1	1	1	1	1	1	1	1	1	1	1	1	1	1	1	1	1	1	1	1	1	1	1	1	1	1	1	1	1	1	1	1	1	1	1	1	89761	152446	153445	1
DG(22:5n3/0:0/22:6n3)	1	1	1	1	1	1	1	1	1	1	1	1	1	1	1	1	1	1	1	1	1	1	1	1	1	1	1	1	1	1	1	1	1	1	1	1	1	1	1	1	1	1	1	1	1	89761	152446	153445	1
DG(22:5n6/0:0/22:6n3)	1	1	1	1	1	1	1	1	1	1	1	1	1	1	1	1	1	1	1	1	1	1	1	1	1	1	1	1	1	1	1	1	1	1	1	1	1	1	1	1	1	1	1	1	1	89761	152446	153445	1
CE(22:6)	1	1	1	56814	66522	72435	70040	66638	33393	102829	106390	96557	1	1	1	89489	87675	89161	1	1	1	1	1	1	1	1	1	1	1	1	1	1	1	127494	136103	138377	140829	145210	158686	57259	55702	44215	1	213844	239858	1	1	1	1
CE(20:3(5Z,8Z,11Z))	1	1	1	56814	66522	67111	276221	286381	280805	459463	532039	502263	41850	35733	36335	491217	439549	447980	1	1	1	1	1	1	275446	337123	99552	1	1	1	1	1	1	127494	19907	73931	117751	131790	153604	485613	439382	478807	225891	182735	222305	343015	347795	332021	1
CE(20:3)	1	1	1	56814	66522	67111	276221	286381	280805	459463	532039	502263	41850	35733	36335	491217	439549	447980	1	1	1	1	1	1	275446	337123	99552	1	1	1	1	1	1	127494	19907	73931	117751	131790	153604	485613	439382	478807	225891	182735	222305	343015	347795	332021	1
CE(22:5(7Z,10Z,13Z,16Z,19Z))	1	1	1	1	1	22257	79985	82922	70082	99398	1	1	1	1	1	1	109605	112763	1	1	1	1	1	1	80519	86624	85697	1	1	1	1	1	1	1	1	28033	42011	40569	34134	107546	93653	105295	65115	56446	50665	50534	50616	44663	1
CE(22:5(4Z,7Z,10Z,13Z,16Z))	1	1	1	1	1	22257	79985	82922	70082	99398	1	1	1	1	1	1	109605	112763	1	1	1	1	1	1	80519	86624	85697	1	1	1	1	1	1	1	1	28033	42011	40569	34134	107546	93653	105295	65115	56446	50665	50534	50616	44663	1
22:5 Cholesteryl ester	1	1	1	1	1	22257	79985	82922	70082	99398	283359	255087	1	1	1	422052	109605	112763	1	1	1	1	1	1	80519	86624	85697	1	1	1	1	1	1	1	1	28033	42011	40569	34134	107546	93653	105295	65115	56446	50665	50534	50616	44663	1
DG(19:0/22:1(13Z)/0:0)[iso2]	1	1	1	1	1	1	31937	182386	173177	1	1	1	1	1	1	1	1	1	1	1	1	1	1	1	157975	140363	201484	1	1	1	1	1	1	1	1	1	1	1	1	65313	46868	53759	160132	167637	179851	1	1	1	1
DG(20:1(11Z)/21:0/0:0)[iso2]	1	1	1	1	1	1	31937	182386	173177	1	1	1	1	1	1	1	1	1	1	1	1	1	1	1	157975	140363	201484	1	1	1	1	1	1	1	1	1	1	1	1	65313	46868	53759	160132	167637	179851	1	1	1	1
PA(16:0/18:1(9Z))	180914	167757	1	442759	464099	441638	1	1367278	1	1550605	1561830	1520728	337612	316987	340232	1386874	1314957	1	1	1	1	284391	288347	295699	1	1	1	319127	318926	332858	1	1	1	505150	552275	533263	495953	498143	499827	1546548	1	1	1	1	1	1	1	1	348817
Galactosylceramide (d18:1/16:0)	1	1	1	1	1	1	1	1	1	1	1	1	1	1	1	1	1	1	1	1	1	1	1	1	1	1	1	1	1	1	1	1	1	1	1	1	1	1	1	1	1	1	1	1	1	1	1	1	1
Glucosylceramide (d18:1/16:0)	1	1	1	1	1	1	1	1	1	1	1	1	1	1	1	1	1	1	1	1	1	1	1	1	1	1	1	1	1	1	1	1	1	1	1	1	1	1	1	1	1	1	1	1	1	1	1	1	1
DG(22:2n6/0:0/20:4n3)	376745	269069	311159	873174	1020584	934147	229300	191240	235850	318839	339163	317011	103941	103498	100279	296507	302052	299210	90151	115085	175254	600019	602430	629407	271006	285174	277176	335557	278351	461201	261306	178110	199428	1065957	1381346	228407	1020606	1030668	902761	402398	387676	406261	1344148	271978	280719	295701	289477	312524	259515
DG(20:0/22:6(4Z,7Z,10Z,13Z,16Z,19Z)/0:0)	376745	269069	311159	873174	1020584	934147	1	191240	1	318839	339163	317011	103941	103498	100279	296507	302052	299210	90151	115085	175254	600019	602430	629407	1	1	1	335557	278351	461201	261306	178110	199428	1065957	1381346	1	1020606	1030668	902761	1	1	1	1344148	1	1	1	1	1	259515
DG(20:1n9/0:0/22:5n6)	376745	269069	311159	873174	1020584	934147	1	191240	1	318839	339163	317011	103941	103498	100279	296507	302052	299210	90151	115085	175254	600019	602430	629407	1	1	1	335557	278351	461201	261306	178110	199428	1065957	1381346	1	1020606	1030668	902761	1	1	1	1344148	1	1	1	1	1	259515
DG(20:1(11Z)/22:5(4Z,7Z,10Z,13Z,16Z)/0:0)	376745	269069	311159	873174	1020584	934147	1	191240	1	318839	339163	317011	103941	103498	100279	296507	302052	299210	90151	115085	175254	600019	602430	629407	1	1	1	335557	278351	461201	261306	178110	199428	1065957	1381346	1	1020606	1030668	902761	1	1	1	1344148	1	1	1	1	1	259515
DG(20:1n9/0:0/22:5n3)	376745	269069	311159	873174	1020584	934147	1	191240	1	318839	339163	317011	103941	103498	100279	296507	302052	299210	90151	115085	175254	600019	602430	629407	1	1	1	335557	278351	461201	261306	178110	199428	1065957	1381346	1	1020606	1030668	902761	1	1	1	1344148	1	1	1	1	1	259515
DG(22:4(7Z,10Z,13Z,16Z)/20:2(11Z,14Z)/0:0)	376745	269069	311159	873174	1020584	934147	1	191240	1	318839	339163	317011	103941	103498	100279	296507	302052	299210	90151	115085	175254	600019	602430	629407	1	1	1	335557	278351	461201	261306	178110	199428	1065957	1381346	1	1020606	1030668	902761	1	1	1	1344148	1	1	1	1	1	259515
DG(22:5(7Z,10Z,13Z,16Z,19Z)/20:1(11Z)/0:0)	376745	269069	311159	873174	1020584	934147	1	191240	1	318839	339163	317011	103941	103498	100279	296507	302052	299210	90151	115085	175254	600019	602430	629407	1	1	1	335557	278351	461201	261306	178110	199428	1065957	1381346	1	1020606	1030668	902761	1	1	1	1344148	1	1	1	1	1	259515
DG(20:5(5Z,8Z,11Z,14Z,17Z)/22:1(13Z)/0:0)	376745	269069	311159	873174	1020584	934147	1	191240	1	318839	339163	317011	103941	103498	100279	296507	302052	299210	90151	115085	175254	600019	602430	629407	1	1	1	335557	278351	461201	261306	178110	199428	1065957	1381346	1	1020606	1030668	902761	1	1	1	1344148	1	1	1	1	1	259515
DG(22:5(4Z,7Z,10Z,13Z,16Z)/20:1(11Z)/0:0)	376745	269069	311159	873174	1020584	934147	1	191240	1	318839	339163	317011	103941	103498	100279	296507	302052	299210	90151	115085	175254	600019	602430	629407	1	1	1	335557	278351	461201	261306	178110	199428	1065957	1381346	1	1020606	1030668	902761	1	1	1	1344148	1	1	1	1	1	259515
DG(22:1n9/0:0/20:5n3)	376745	269069	311159	873174	1020584	934147	1	191240	1	318839	339163	317011	103941	103498	100279	296507	302052	299210	90151	115085	175254	600019	602430	629407	1	1	1	335557	278351	461201	261306	178110	199428	1065957	1381346	1	1020606	1030668	902761	1	1	1	1344148	1	1	1	1	1	259515
DG(20:4(8Z,11Z,14Z,17Z)/22:2(13Z,16Z)/0:0)	376745	269069	311159	873174	1020584	934147	1	191240	1	318839	339163	317011	103941	103498	100279	296507	302052	299210	90151	115085	175254	600019	602430	629407	1	1	1	335557	278351	461201	261306	178110	199428	1065957	1381346	1	1020606	1030668	902761	1	1	1	1344148	1	1	1	1	1	259515
DG(20:2(11Z,14Z)/22:4(7Z,10Z,13Z,16Z)/0:0)	376745	269069	311159	873174	1020584	934147	1	191240	1	318839	339163	317011	103941	103498	100279	296507	302052	299210	90151	115085	175254	600019	602430	629407	1	1	1	335557	278351	461201	261306	178110	199428	1065957	1381346	1	1020606	1030668	902761	1	1	1	1344148	1	1	1	1	1	259515
DG(20:4n6/0:0/22:2n6)	376745	269069	311159	873174	1020584	934147	1	191240	1	318839	339163	317011	103941	103498	100279	296507	302052	299210	90151	115085	175254	600019	602430	629407	1	1	1	335557	278351	461201	261306	178110	199428	1065957	1381346	1	1020606	1030668	902761	1	1	1	1344148	1	1	1	1	1	259515
DG(22:6(4Z,7Z,10Z,13Z,16Z,19Z)/20:0/0:0)	376745	269069	311159	873174	1020584	934147	1	191240	1	318839	339163	317011	103941	103498	100279	296507	302052	299210	90151	115085	175254	600019	602430	629407	1	1	1	335557	278351	461201	261306	178110	199428	1065957	1381346	1	1020606	1030668	902761	1	1	1	1344148	1	1	1	1	1	259515
DG(20:1(11Z)/22:5(7Z,10Z,13Z,16Z,19Z)/0:0)	376745	269069	311159	873174	1020584	934147	1	191240	1	318839	339163	317011	103941	103498	100279	296507	302052	299210	90151	115085	175254	600019	602430	629407	1	1	1	335557	278351	461201	261306	178110	199428	1065957	1381346	1	1020606	1030668	902761	1	1	1	1344148	1	1	1	1	1	259515
DG(22:1(13Z)/20:5(5Z,8Z,11Z,14Z,17Z)/0:0)	376745	269069	311159	873174	1020584	934147	1	191240	1	318839	339163	317011	103941	103498	100279	296507	302052	299210	90151	115085	175254	600019	602430	629407	1	1	1	335557	278351	461201	261306	178110	199428	1065957	1381346	1	1020606	1030668	902761	1	1	1	1344148	1	1	1	1	1	259515
DG(20:0/0:0/22:6n3)	376745	269069	311159	873174	1020584	934147	1	191240	1	318839	339163	317011	103941	103498	100279	296507	302052	299210	90151	115085	175254	600019	602430	629407	1	1	1	335557	278351	461201	261306	178110	199428	1065957	1381346	1	1020606	1030668	902761	1	1	1	1344148	1	1	1	1	1	259515
DG(22:2(13Z,16Z)/20:4(5Z,8Z,11Z,14Z)/0:0)	376745	269069	311159	873174	1020584	934147	1	191240	1	318839	339163	317011	103941	103498	100279	296507	302052	299210	90151	115085	175254	600019	602430	629407	1	1	1	335557	278351	461201	261306	178110	199428	1065957	1381346	1	1020606	1030668	902761	1	1	1	1344148	1	1	1	1	1	259515
DG(20:4(5Z,8Z,11Z,14Z)/22:2(13Z,16Z)/0:0)	376745	269069	311159	873174	1020584	934147	1	191240	1	318839	339163	317011	103941	103498	100279	296507	302052	299210	90151	115085	175254	600019	602430	629407	1	1	1	335557	278351	461201	261306	178110	199428	1065957	1381346	1	1020606	1030668	902761	1	1	1	1344148	1	1	1	1	1	259515
DG(22:2(13Z,16Z)/20:4(8Z,11Z,14Z,17Z)/0:0)	376745	269069	311159	873174	1020584	934147	1	191240	1	318839	339163	317011	103941	103498	100279	296507	302052	299210	90151	115085	175254	600019	602430	629407	1	1	1	335557	278351	461201	261306	178110	199428	1065957	1381346	1	1020606	1030668	902761	1	1	1	1344148	1	1	1	1	1	259515
DG(20:2n6/0:0/22:4n6)	376745	269069	311159	873174	1020584	934147	1	191240	1	318839	339163	317011	103941	103498	100279	296507	302052	299210	90151	115085	175254	600019	602430	629407	1	1	1	335557	278351	461201	261306	178110	199428	1065957	1381346	1	1020606	1030668	902761	1	1	1	1344148	1	1	1	1	1	259515
DG(20:0/22:5(4Z,7Z,10Z,13Z,16Z)/0:0)	3732298	3582442	3533475	5566848	5963554	5435874	6759209	11212436	11697209	10505135	1	1	3921861	3301965	4303631	1	3370403	4173333	1826402	1734444	1871194	4078281	4151321	4163208	13272592	11799785	13613296	4426629	3867558	4235541	2618042	2703742	2961910	7646757	8410143	8368118	7619156	7745786	7088766	15492200	12726413	15276251	1	1	1	1	1	1	1
DG(22:1(13Z)/20:4(5Z,8Z,11Z,14Z)/0:0)	3732298	3582442	3533475	5566848	5963554	5435874	6759209	11212436	11697209	10505135	1	1	3921861	3301965	4303631	1	3370403	4173333	1826402	1734444	1871194	4078281	4151321	4163208	13272592	11799785	13613296	4426629	3867558	4235541	2618042	2703742	2961910	7646757	8410143	8368118	7619156	7745786	7088766	15492200	12726413	15276251	1	1	1	1	1	1	1
DG(22:0/20:5(5Z,8Z,11Z,14Z,17Z)/0:0)	3732298	3582442	3533475	5566848	5963554	5435874	6759209	11212436	11697209	10505135	1	1	3921861	3301965	4303631	1	3370403	4173333	1826402	1734444	1871194	4078281	4151321	4163208	13272592	11799785	13613296	4426629	3867558	4235541	2618042	2703742	2961910	7646757	8410143	8368118	7619156	7745786	7088766	15492200	12726413	15276251	1	1	1	1	1	1	1
DG(22:2(13Z,16Z)/20:3(8Z,11Z,14Z)/0:0)	3732298	3582442	3533475	5566848	5963554	5435874	6759209	11212436	11697209	10505135	1	1	3921861	3301965	4303631	1	3370403	4173333	1826402	1734444	1871194	4078281	4151321	4163208	13272592	11799785	13613296	4426629	3867558	4235541	2618042	2703742	2961910	7646757	8410143	8368118	7619156	7745786	7088766	15492200	12726413	15276251	1	1	1	1	1	1	1
DG(20:4(8Z,11Z,14Z,17Z)/22:1(13Z)/0:0)	3732298	3582442	3533475	5566848	5963554	5435874	6759209	11212436	11697209	10505135	1	1	3921861	3301965	4303631	1	3370403	4173333	1826402	1734444	1871194	4078281	4151321	4163208	13272592	11799785	13613296	4426629	3867558	4235541	2618042	2703742	2961910	7646757	8410143	8368118	7619156	7745786	7088766	15492200	12726413	15276251	1	1	1	1	1	1	1
DG(22:1(13Z)/20:4(8Z,11Z,14Z,17Z)/0:0)	3732298	3582442	3533475	5566848	5963554	5435874	6759209	11212436	11697209	10505135	1	1	3921861	3301965	4303631	1	3370403	4173333	1826402	1734444	1871194	4078281	4151321	4163208	13272592	11799785	13613296	4426629	3867558	4235541	2618042	2703742	2961910	7646757	8410143	8368118	7619156	7745786	7088766	15492200	12726413	15276251	1	1	1	1	1	1	1
DG(20:0/0:0/22:5n6)	3732298	3582442	3533475	5566848	5963554	5435874	6759209	11212436	11697209	10505135	1	1	3921861	3301965	4303631	1	3370403	4173333	1826402	1734444	1871194	4078281	4151321	4163208	13272592	11799785	13613296	4426629	3867558	4235541	2618042	2703742	2961910	7646757	8410143	8368118	7619156	7745786	7088766	15492200	12726413	15276251	1	1	1	1	1	1	1
DG(20:1(11Z)/22:4(7Z,10Z,13Z,16Z)/0:0)	3732298	3582442	3533475	5566848	5963554	5435874	6759209	11212436	11697209	10505135	1	1	3921861	3301965	4303631	1	3370403	4173333	1826402	1734444	1871194	4078281	4151321	4163208	13272592	11799785	13613296	4426629	3867558	4235541	2618042	2703742	2961910	7646757	8410143	8368118	7619156	7745786	7088766	15492200	12726413	15276251	1	1	1	1	1	1	1
DG(22:0/0:0/20:5n3)	3732298	3582442	3533475	5566848	5963554	5435874	6759209	11212436	11697209	10505135	1	1	3921861	3301965	4303631	1	3370403	4173333	1826402	1734444	1871194	4078281	4151321	4163208	13272592	11799785	13613296	4426629	3867558	4235541	2618042	2703742	2961910	7646757	8410143	8368118	7619156	7745786	7088766	15492200	12726413	15276251	1	1	1	1	1	1	1
DG(20:0/0:0/22:5n3)	3732298	3582442	3533475	5566848	5963554	5435874	6759209	11212436	11697209	10505135	1	1	3921861	3301965	4303631	1	3370403	4173333	1826402	1734444	1871194	4078281	4151321	4163208	13272592	11799785	13613296	4426629	3867558	4235541	2618042	2703742	2961910	7646757	8410143	8368118	7619156	7745786	7088766	15492200	12726413	15276251	1	1	1	1	1	1	1
DG(22:2(13Z,16Z)/20:3(5Z,8Z,11Z)/0:0)	3732298	3582442	3533475	5566848	5963554	5435874	6759209	11212436	11697209	10505135	1	1	3921861	3301965	4303631	1	3370403	4173333	1826402	1734444	1871194	4078281	4151321	4163208	13272592	11799785	13613296	4426629	3867558	4235541	2618042	2703742	2961910	7646757	8410143	8368118	7619156	7745786	7088766	15492200	12726413	15276251	1	1	1	1	1	1	1
DG(18:4(6Z,9Z,12Z,15Z)/24:1(15Z)/0:0)	3732298	3582442	3533475	5566848	5963554	5435874	6759209	11212436	11697209	10505135	1	1	3921861	3301965	4303631	1	3370403	4173333	1826402	1734444	1871194	4078281	4151321	4163208	13272592	11799785	13613296	4426629	3867558	4235541	2618042	2703742	2961910	7646757	8410143	8368118	7619156	7745786	7088766	15492200	12726413	15276251	1	1	1	1	1	1	1
DG(20:3n9/0:0/22:2n6)	3732298	3582442	3533475	5566848	5963554	5435874	6759209	11212436	11697209	10505135	1	1	3921861	3301965	4303631	1	3370403	4173333	1826402	1734444	1871194	4078281	4151321	4163208	13272592	11799785	13613296	4426629	3867558	4235541	2618042	2703742	2961910	7646757	8410143	8368118	7619156	7745786	7088766	15492200	12726413	15276251	1	1	1	1	1	1	1
DG(20:5(5Z,8Z,11Z,14Z,17Z)/22:0/0:0)	3732298	3582442	3533475	5566848	5963554	5435874	6759209	11212436	11697209	10505135	1	1	3921861	3301965	4303631	1	3370403	4173333	1826402	1734444	1871194	4078281	4151321	4163208	13272592	11799785	13613296	4426629	3867558	4235541	2618042	2703742	2961910	7646757	8410143	8368118	7619156	7745786	7088766	15492200	12726413	15276251	1	1	1	1	1	1	1
DG(24:1(15Z)/18:4(6Z,9Z,12Z,15Z)/0:0)	3732298	3582442	3533475	5566848	5963554	5435874	6759209	11212436	11697209	10505135	1	1	3921861	3301965	4303631	1	3370403	4173333	1826402	1734444	1871194	4078281	4151321	4163208	13272592	11799785	13613296	4426629	3867558	4235541	2618042	2703742	2961910	7646757	8410143	8368118	7619156	7745786	7088766	15492200	12726413	15276251	1	1	1	1	1	1	1
DG(24:1n9/0:0/18:4n3)	3732298	3582442	3533475	5566848	5963554	5435874	6759209	11212436	11697209	10505135	1	1	3921861	3301965	4303631	1	3370403	4173333	1826402	1734444	1871194	4078281	4151321	4163208	13272592	11799785	13613296	4426629	3867558	4235541	2618042	2703742	2961910	7646757	8410143	8368118	7619156	7745786	7088766	15492200	12726413	15276251	1	1	1	1	1	1	1
DG(22:5(4Z,7Z,10Z,13Z,16Z)/20:0/0:0)	3732298	3582442	3533475	5566848	5963554	5435874	6759209	11212436	11697209	10505135	1	1	3921861	3301965	4303631	1	3370403	4173333	1826402	1734444	1871194	4078281	4151321	4163208	13272592	11799785	13613296	4426629	3867558	4235541	2618042	2703742	2961910	7646757	8410143	8368118	7619156	7745786	7088766	15492200	12726413	15276251	1	1	1	1	1	1	1
DG(22:5(7Z,10Z,13Z,16Z,19Z)/20:0/0:0)	3732298	3582442	3533475	5566848	5963554	5435874	6759209	11212436	11697209	10505135	1	1	3921861	3301965	4303631	1	3370403	4173333	1826402	1734444	1871194	4078281	4151321	4163208	13272592	11799785	13613296	4426629	3867558	4235541	2618042	2703742	2961910	7646757	8410143	8368118	7619156	7745786	7088766	15492200	12726413	15276251	1	1	1	1	1	1	1
DG(20:1n9/0:0/22:4n6)	3732298	3582442	3533475	5566848	5963554	5435874	6759209	11212436	11697209	10505135	1	1	3921861	3301965	4303631	1	3370403	4173333	1826402	1734444	1871194	4078281	4151321	4163208	13272592	11799785	13613296	4426629	3867558	4235541	2618042	2703742	2961910	7646757	8410143	8368118	7619156	7745786	7088766	15492200	12726413	15276251	1	1	1	1	1	1	1
DG(20:4(5Z,8Z,11Z,14Z)/22:1(13Z)/0:0)	3732298	3582442	3533475	5566848	5963554	5435874	6759209	11212436	11697209	10505135	1	1	3921861	3301965	4303631	1	3370403	4173333	1826402	1734444	1871194	4078281	4151321	4163208	13272592	11799785	13613296	4426629	3867558	4235541	2618042	2703742	2961910	7646757	8410143	8368118	7619156	7745786	7088766	15492200	12726413	15276251	1	1	1	1	1	1	1
DG(20:3(5Z,8Z,11Z)/22:2(13Z,16Z)/0:0)	3732298	3582442	3533475	5566848	5963554	5435874	6759209	11212436	11697209	10505135	1	1	3921861	3301965	4303631	1	3370403	4173333	1826402	1734444	1871194	4078281	4151321	4163208	13272592	11799785	13613296	4426629	3867558	4235541	2618042	2703742	2961910	7646757	8410143	8368118	7619156	7745786	7088766	15492200	12726413	15276251	1	1	1	1	1	1	1
DG(20:0/22:5(7Z,10Z,13Z,16Z,19Z)/0:0)	3732298	3582442	3533475	5566848	5963554	5435874	6759209	11212436	11697209	10505135	1	1	3921861	3301965	4303631	1	3370403	4173333	1826402	1734444	1871194	4078281	4151321	4163208	13272592	11799785	13613296	4426629	3867558	4235541	2618042	2703742	2961910	7646757	8410143	8368118	7619156	7745786	7088766	15492200	12726413	15276251	1	1	1	1	1	1	1
DG(20:3(8Z,11Z,14Z)/22:2(13Z,16Z)/0:0)	3732298	3582442	3533475	5566848	5963554	5435874	6759209	11212436	11697209	10505135	1	1	3921861	3301965	4303631	1	3370403	4173333	1826402	1734444	1871194	4078281	4151321	4163208	13272592	11799785	13613296	4426629	3867558	4235541	2618042	2703742	2961910	7646757	8410143	8368118	7619156	7745786	7088766	15492200	12726413	15276251	1	1	1	1	1	1	1
DG(22:1n9/0:0/20:4n6)	3732298	3582442	3533475	5566848	5963554	5435874	6759209	11212436	11697209	10505135	1	1	3921861	3301965	4303631	1	3370403	4173333	1826402	1734444	1871194	4078281	4151321	4163208	13272592	11799785	13613296	4426629	3867558	4235541	2618042	2703742	2961910	7646757	8410143	8368118	7619156	7745786	7088766	15492200	12726413	15276251	1	1	1	1	1	1	1
DG(22:1n9/0:0/20:4n3)	3732298	3582442	3533475	5566848	5963554	5435874	6759209	11212436	11697209	10505135	1	1	3921861	3301965	4303631	1	3370403	4173333	1826402	1734444	1871194	4078281	4151321	4163208	13272592	11799785	13613296	4426629	3867558	4235541	2618042	2703742	2961910	7646757	8410143	8368118	7619156	7745786	7088766	15492200	12726413	15276251	1	1	1	1	1	1	1
DG(22:4(7Z,10Z,13Z,16Z)/20:1(11Z)/0:0)	3732298	3582442	3533475	5566848	5963554	5435874	6759209	11212436	11697209	10505135	1	1	3921861	3301965	4303631	1	3370403	4173333	1826402	1734444	1871194	4078281	4151321	4163208	13272592	11799785	13613296	4426629	3867558	4235541	2618042	2703742	2961910	7646757	8410143	8368118	7619156	7745786	7088766	15492200	12726413	15276251	1	1	1	1	1	1	1
DG(22:5n6/0:0/22:5n6)	1	1	1	1	1	1	1	1	1	1	1	1	1	1	1	1	1	1	1	1	1	1	1	1	1	1	1	1	1	1	1	1	1	1	1	1	1	1	1	1	1	1	1	1	1	1	1	1	1
DG(22:5n6/0:0/22:5n3)	1	1	1	1	1	1	1	1	1	1	1	1	1	1	1	1	1	1	1	1	1	1	1	1	1	1	1	1	1	1	1	1	1	1	1	1	1	1	1	1	1	1	1	1	1	1	1	1	1
DG(22:4(7Z,10Z,13Z,16Z)/22:6(4Z,7Z,10Z,13Z,16Z,19Z)/0:0)	1	1	1	1	1	1	1	1	1	1	1	1	1	1	1	1	1	1	1	1	1	1	1	1	1	1	1	1	1	1	1	1	1	1	1	1	1	1	1	1	1	1	1	1	1	1	1	1	1
DG(22:4n6/0:0/22:6n3)	1	1	1	1	1	1	1	1	1	1	1	1	1	1	1	1	1	1	1	1	1	1	1	1	1	1	1	1	1	1	1	1	1	1	1	1	1	1	1	1	1	1	1	1	1	1	1	1	1
DG(22:5(7Z,10Z,13Z,16Z,19Z)/22:5(4Z,7Z,10Z,13Z,16Z)/0:0)	1	1	1	1	1	1	1	1	1	1	1	1	1	1	1	1	1	1	1	1	1	1	1	1	1	1	1	1	1	1	1	1	1	1	1	1	1	1	1	1	1	1	1	1	1	1	1	1	1
DG(22:5(4Z,7Z,10Z,13Z,16Z)/22:5(7Z,10Z,13Z,16Z,19Z)/0:0)	1	1	1	1	1	1	1	1	1	1	1	1	1	1	1	1	1	1	1	1	1	1	1	1	1	1	1	1	1	1	1	1	1	1	1	1	1	1	1	1	1	1	1	1	1	1	1	1	1
DG(22:5(7Z,10Z,13Z,16Z,19Z)/22:5(7Z,10Z,13Z,16Z,19Z)/0:0)	1	1	1	1	1	1	1	1	1	1	1	1	1	1	1	1	1	1	1	1	1	1	1	1	1	1	1	1	1	1	1	1	1	1	1	1	1	1	1	1	1	1	1	1	1	1	1	1	1
DG(22:6(4Z,7Z,10Z,13Z,16Z,19Z)/22:4(7Z,10Z,13Z,16Z)/0:0)	1	1	1	1	1	1	1	1	1	1	1	1	1	1	1	1	1	1	1	1	1	1	1	1	1	1	1	1	1	1	1	1	1	1	1	1	1	1	1	1	1	1	1	1	1	1	1	1	1
DG(22:5(4Z,7Z,10Z,13Z,16Z)/22:5(4Z,7Z,10Z,13Z,16Z)/0:0)	1	1	1	1	1	1	1	1	1	1	1	1	1	1	1	1	1	1	1	1	1	1	1	1	1	1	1	1	1	1	1	1	1	1	1	1	1	1	1	1	1	1	1	1	1	1	1	1	1
DG(22:5n3/0:0/22:5n3)	1	1	1	1	1	1	1	1	1	1	1	1	1	1	1	1	1	1	1	1	1	1	1	1	1	1	1	1	1	1	1	1	1	1	1	1	1	1	1	1	1	1	1	1	1	215219	213439	205713	1
SM(d18:0/14:0)	1	1	1	1	1	1	1	1	1	1	1	1	170881	177202	162602	1	1	1	1	1	1	1	1	1	1	1	1	1	1	1	1	1	1	1	1	1	1	1	1	1	1	1	1	1	1	1	1	1	1
SM(d18:1/16:1(9Z)(OH))	304557	295201	294939	1	1	1	1	1	1	1	1	1	170881	177202	185305	1	1	1	1	1	1	1	1	1	1	1	1	1	1	1	1	1	1	1	1	1	1	1	1	1	1	1	1	1	1	1	1	1	1
SM(d16:0/18:2(9Z,11E))	393279	387851	380959	1	1	1	1	1	1	1	1	1	212828	220896	232851	1	1	1	1	1	1	1	1	1	115603	1	150630	1	1	1	1	1	1	30153	161219	165683	198089	173592	1	1	1	27090	59384	143192	36043	19945	21861	1	1
SM(d18:1/16:1(9Z))	393279	387851	380959	1	1	1	1	1	1	1	1	1	212828	220896	232851	1	1	1	1	1	1	1	1	1	115603	1	150630	1	1	1	1	1	1	30153	161219	165683	198089	173592	1	1	1	27090	59384	143192	36043	19945	21861	1	1
PA(18:1(11Z)/18:1(9Z))	1	1	1	199236	208015	201084	834860	833899	856820	87780	89276	75454	1	1	1	281269	251659	275013	1	1	1	124088	1	126615	1	1	1	153043	141848	155618	1	1	1	354209	382914	374771	270734	254920	259707	1	1	1	80647	78576	79167	128262	142126	157179	1
PA(18:1(11Z)/18:1(11Z))	1	1	1	199236	208015	201084	834860	833899	856820	87780	89276	75454	1	1	1	281269	251659	275013	1	1	1	124088	1	126615	1	1	1	153043	141848	155618	1	1	1	354209	382914	374771	270734	254920	259707	1	1	1	80647	78576	79167	128262	142126	157179	1
PA(18:1(9Z)/18:1(11Z))	1	1	1	199236	208015	201084	834860	833899	856820	87780	89276	75454	1	1	1	281269	251659	275013	1	1	1	124088	1	126615	1	1	1	153043	141848	155618	1	1	1	354209	382914	374771	270734	254920	259707	1	1	1	80647	78576	79167	128262	142126	157179	1
PA(18:0/18:2(9Z,12Z))	1	1	1	199236	208015	201084	834860	833899	856820	87780	89276	75454	1	1	1	281269	251659	275013	1	1	1	124088	1	126615	1	1	1	153043	141848	155618	1	1	1	354209	382914	374771	270734	254920	259707	1	1	1	80647	78576	79167	128262	142126	157179	1
PA(18:1(9Z)/18:1(9Z))	1	1	1	199236	208015	201084	834860	833899	856820	87780	89276	75454	1	1	1	281269	251659	275013	1	1	1	124088	1	126615	58869	72294	70683	153043	141848	155618	1	1	1	354209	382914	374771	270734	254920	259707	144137	130885	134431	80647	78576	79167	128262	142126	157179	131347
PE(16:0/P-18:1(11Z))	1	1	1	1	1	1	1	1	1	70560	73975	62578	1	1	1	58097	63116	57900	1	1	1	1	1	1	1	1	1	1	1	1	1	1	1	30872	1	1	1	1	1	81221	85884	84660	1	1	1	1	1	1	1
PE(18:1(11Z)/P-16:0)	1	1	1	1	1	1	1	1	1	70560	73975	62578	1	1	1	58097	63116	57900	1	1	1	1	1	1	1	1	1	1	1	1	1	1	1	30872	1	1	1	1	1	81221	85884	84660	1	1	1	1	1	1	1
PE(16:0/P-18:1(9Z))	1	1	1	1	1	1	1	1	1	70560	73975	62578	1	1	1	58097	63116	57900	1	1	1	1	1	1	1	1	1	1	1	1	1	1	1	30872	1	1	1	1	1	81221	85884	84660	1	1	1	1	1	1	1
PE(P-18:1(11Z)/16:0)	1	1	1	1	1	1	1	1	1	70560	73975	62578	1	1	1	58097	63116	57900	1	1	1	1	1	1	1	1	1	1	1	1	1	1	1	30872	1	1	1	1	1	81221	85884	84660	1	1	1	1	1	1	1
PE(P-18:0/16:1(9Z))	1	1	1	1	1	1	1	1	1	70560	73975	62578	1	1	1	58097	63116	57900	1	1	1	1	1	1	1	1	1	1	1	1	1	1	1	30872	1	1	1	1	1	81221	85884	84660	1	1	1	1	1	1	1
PE(18:1(9Z)/P-16:0)	1	1	1	1	1	1	1	1	1	70560	73975	62578	1	1	1	58097	63116	57900	1	1	1	1	1	1	1	1	1	1	1	1	1	1	1	30872	1	1	1	1	1	81221	85884	84660	1	1	1	1	1	1	1
PEP-16:0/18:1(11Z))	1	1	1	1	1	1	1	1	1	70560	73975	62578	1	1	1	58097	63116	57900	1	1	1	1	1	1	1	1	1	1	1	1	1	1	1	30872	1	1	1	1	1	81221	85884	84660	1	1	1	1	1	1	1
PE(P-16:0/18:1(9Z))	1	1	1	1	1	1	1	1	1	70560	73975	62578	1	1	1	58097	63116	57900	1	1	1	1	1	1	1	1	1	1	1	1	1	1	1	30872	1	1	1	1	1	81221	85884	84660	1	1	1	1	1	1	1
PE(16:1(9Z)/P-18:0)	1	1	1	1	1	1	1	1	1	70560	73975	62578	1	1	1	58097	63116	57900	1	1	1	1	1	1	1	1	1	1	1	1	1	1	1	30872	1	1	1	1	1	81221	85884	84660	1	1	1	1	1	1	1
PE(P-18:1(9Z)/16:0)	1	1	1	1	1	1	43739	46697	42505	70560	73975	62578	1	1	1	58097	63116	57900	1	1	1	1	1	1	1	1	1	1	1	1	1	1	1	30872	1	1	1	1	1	81221	85884	84660	1	1	1	1	1	1	1
PE(15:0/18:3(6Z,9Z,12Z))	1	1	1	1	1	1	1	1	1	1	1	1	1	1	1	1	1	1	1	1	1	1	1	1	1	1	1	1	1	1	1	1	1	1	1	1	1	1	1	1	1	1	1	1	1	1	1	1	1
PE(15:0/18:3(9Z,12Z,15Z))	1	1	1	1	1	1	1	1	1	1	1	1	1	1	1	1	1	1	1	1	1	1	1	1	1	1	1	1	1	1	1	1	1	1	1	1	1	1	1	1	1	1	1	1	1	1	1	1	1
PE(18:3(6Z,9Z,12Z)/15:0)	1	1	1	1	1	1	1	1	1	1	1	1	1	1	1	1	1	1	1	1	1	1	1	1	1	1	1	1	1	1	1	1	1	1	1	1	1	1	1	1	1	1	1	1	1	1	1	1	1
PE(18:3(9Z,12Z,15Z)/15:0)	1	1	1	1	1	1	1	1	1	1	1	1	1	1	1	1	1	1	1	1	1	1	1	1	1	1	1	1	1	1	1	1	1	1	1	1	1	1	1	1	1	1	1	1	1	1	1	1	1
PC(16:1(9Z)/14:1(9Z))	1	1	1	1	1	1	184339	182178	183086	213136	226498	209714	1	1	1	198382	206409	218858	1	1	1	1	1	1	226549	229547	235649	1	1	1	1	1	1	179505	184191	189069	195230	184033	186260	308543	277834	301807	245632	230406	247588	265604	267000	255991	1
PE(18:2(9Z,12Z)/15:0)	1	1	1	1	1	1	184339	182178	183086	213136	226498	209714	1	1	1	198382	206409	218858	1	1	1	1	1	1	226549	229547	235649	1	1	1	1	1	1	179505	184191	189069	195230	184033	186260	308543	277834	301807	245632	230406	247588	265604	267000	255991	1
PE(15:0/18:2(9Z,12Z))	1	1	1	1	1	1	184339	182178	183086	213136	226498	209714	1	1	1	198382	206409	218858	1	1	1	1	1	1	226549	229547	235649	1	1	1	1	1	1	179505	184191	189069	195230	184033	186260	308543	277834	301807	245632	230406	247588	265604	267000	255991	1
PC(14:1(9Z)/16:1(9Z))	1	1	1	1	1	1	184339	182178	183086	213136	226498	209714	1	1	1	198382	206409	218858	1	1	1	1	1	1	226549	229547	235649	1	1	1	1	1	1	179505	184191	189069	195230	184033	186260	308543	277834	301807	245632	230406	247588	265604	267000	255991	1
PC(16:0/14:1(9Z))	908331	1030533	1116303	1406479	1522343	1528246	953422	962930	841417	836014	844580	829854	467312	449203	405904	526777	528203	510283	1316414	1248467	1389179	1024010	1044660	861141	439013	490997	446718	833294	775271	775513	499450	508069	510879	1107771	1042972	1140113	948735	920101	861322	793237	837283	760221	660126	579150	505375	170276	207647	203496	593634
PC(18:1(9Z)/12:0)	908331	1030533	1116303	1406479	1522343	1528246	953422	962930	841417	836014	844580	829854	467312	449203	405904	526777	528203	510283	1316414	1248467	1389179	1024010	1044660	861141	439013	490997	446718	833294	775271	775513	499450	508069	510879	1107771	1042972	1140113	948735	920101	861322	793237	837283	760221	660126	579150	505375	170276	207647	203496	593634
PE(15:0/18:1(9Z))	908331	1030533	1116303	1406479	1522343	1528246	953422	962930	841417	836014	844580	829854	467312	449203	405904	526777	528203	510283	1316414	1248467	1389179	1024010	1044660	861141	439013	490997	446718	833294	775271	775513	499450	508069	510879	1107771	1042972	1140113	948735	920101	861322	793237	837283	760221	660126	579150	505375	170276	207647	203496	593634
PE(18:1(11Z)/15:0)	908331	1030533	1116303	1406479	1522343	1528246	953422	962930	841417	836014	844580	829854	467312	449203	405904	526777	528203	510283	1316414	1248467	1389179	1024010	1044660	861141	439013	490997	446718	833294	775271	775513	499450	508069	510879	1107771	1042972	1140113	948735	920101	861322	793237	837283	760221	660126	579150	505375	170276	207647	203496	593634
PC(14:0/16:1(9Z))	908331	1030533	1116303	1406479	1522343	1528246	953422	962930	841417	836014	844580	829854	467312	449203	405904	526777	528203	510283	1316414	1248467	1389179	1024010	1044660	861141	439013	490997	446718	833294	775271	775513	499450	508069	510879	1107771	1042972	1140113	948735	920101	861322	793237	837283	760221	660126	579150	505375	170276	207647	203496	593634
PC(16:1(9Z)/14:0)	908331	1030533	1116303	1406479	1522343	1528246	953422	962930	841417	836014	844580	829854	467312	449203	405904	526777	528203	510283	1316414	1248467	1389179	1024010	1044660	861141	439013	490997	446718	833294	775271	775513	499450	508069	510879	1107771	1042972	1140113	948735	920101	861322	793237	837283	760221	660126	579150	505375	170276	207647	203496	593634
PC(12:0/18:1(9Z))	908331	1030533	1116303	1406479	1522343	1528246	953422	962930	841417	836014	844580	829854	467312	449203	405904	526777	528203	510283	1316414	1248467	1389179	1024010	1044660	861141	439013	490997	446718	833294	775271	775513	499450	508069	510879	1107771	1042972	1140113	948735	920101	861322	793237	837283	760221	660126	579150	505375	170276	207647	203496	593634
PE(18:1(9Z)/15:0)	908331	1030533	1116303	1406479	1522343	1528246	953422	962930	841417	836014	844580	829854	467312	449203	405904	526777	528203	510283	1316414	1248467	1389179	1024010	1044660	861141	439013	490997	446718	833294	775271	775513	499450	508069	510879	1107771	1042972	1140113	948735	920101	861322	793237	837283	760221	660126	579150	505375	170276	207647	203496	593634
PE(15:0/18:1(11Z))	908331	1030533	1116303	1406479	1522343	1528246	953422	962930	841417	836014	844580	829854	467312	449203	405904	526777	528203	510283	1316414	1248467	1389179	1024010	1044660	861141	439013	490997	446718	833294	775271	775513	499450	508069	510879	1107771	1042972	1140113	948735	920101	861322	793237	837283	760221	660126	579150	505375	170276	207647	203496	593634
PC(14:1(9Z)/16:0)	908331	1030533	1116303	1406479	1522343	1528246	953422	962930	841417	836014	844580	829854	467312	449203	405904	526777	528203	510283	1316414	1248467	1389179	1024010	1044660	861141	439013	490997	446718	833294	775271	775513	499450	508069	510879	1107771	1042972	1140113	948735	920101	861322	793237	837283	760221	660126	579150	505375	170276	207647	203496	593634
PE(20:5(5Z,8Z,11Z,14Z,17Z)/P-16:0)	177959	174534	168717	1	1	1	1	1	1	1	1	1	1	1	1	1	1	1	1	1	1	1	1	1	1	1	1	1	1	1	1	1	1	1	1	1	1	1	1	1	1	1	1	1	1	1	1	1	1
PE(18:4(6Z,9Z,12Z,15Z)/P-18:1(11Z))	177959	174534	168717	1	1	1	1	1	1	1	1	1	1	1	1	1	1	1	1	1	1	1	1	1	1	1	1	1	1	1	1	1	1	1	1	1	1	1	1	1	1	1	1	1	1	1	1	1	1
PE(18:4(6Z,9Z,12Z,15Z)/P-18:1(9Z))	177959	174534	168717	1	1	1	1	1	1	1	1	1	1	1	1	1	1	1	1	1	1	1	1	1	1	1	1	1	1	1	1	1	1	1	1	1	1	1	1	1	1	1	1	1	1	1	1	1	1
PE(P-16:0/20:5(5Z,8Z,11Z,14Z,17Z))	177959	174534	168717	1	1	1	1	1	1	1	1	1	1	1	1	1	1	1	1	1	1	1	1	1	1	1	1	1	1	1	1	1	1	1	1	1	1	1	1	1	1	1	1	1	1	1	1	1	1
PE(P-18:1(11Z)/18:4(6Z,9Z,12Z,15Z))	177959	174534	168717	1	1	1	1	1	1	1	1	1	1	1	1	1	1	1	1	1	1	1	1	1	1	1	1	1	1	1	1	1	1	1	1	1	1	1	1	1	1	1	1	1	1	1	1	1	1
PE(P-18:1(9Z)/18:4(6Z,9Z,12Z,15Z))	177959	174534	168717	1	1	1	1	1	1	1	1	1	1	110989	120462	1	1	1	1	1	1	1	1	1	1	1	1	1	1	1	1	1	1	1	1	1	1	1	1	1	1	1	1	1	1	1	1	1	1
PE(P-18:1(11Z)/16:1(9Z))	177959	174534	168717	1	1	1	1	1	1	1	1	1	1	110989	120462	1	1	1	1	1	1	1	1	1	1	1	1	1	1	1	1	1	1	1	1	1	1	1	1	1	1	1	1	1	1	1	1	1	1
PE(P-16:0/18:2(9Z,12Z))	177959	174534	168717	1	1	1	1	1	1	1	1	1	1	110989	120462	1	1	1	1	1	1	1	1	1	1	1	1	1	1	1	1	1	1	1	1	1	1	1	1	1	1	1	1	1	1	1	1	1	1
PE(18:2(9Z,12Z)/P-16:0)	177959	174534	168717	1	1	1	1	1	1	1	1	1	1	110989	120462	1	1	1	1	1	1	1	1	1	1	1	1	1	1	1	1	1	1	1	1	1	1	1	1	1	1	1	1	1	1	1	1	1	1
PE(P-18:1(9Z)/16:1(9Z))	177959	174534	168717	1	1	1	1	1	1	1	1	1	1	110989	120462	1	1	1	1	1	1	1	1	1	1	1	1	1	1	1	1	1	1	1	1	1	1	1	1	1	1	1	1	1	1	1	1	1	1
PG(16:0/16:0)	224906	213932	207609	1	1	1	1	1	1	1	1	1	1	116118	136336	1	1	1	1	1	1	1	1	1	1	1	1	1	1	1	1	1	1	1	1	1	1	1	1	1	1	1	1	1	1	1	1	1	1
PE(16:1(9Z)/P-18:1(11Z))	177959	174534	168717	1	1	1	1	1	1	1	1	1	1	110989	120462	1	1	1	1	1	1	1	1	1	1	1	1	1	1	1	1	1	1	1	1	1	1	1	1	1	1	1	1	1	1	1	1	1	1
PE(16:1(9Z)/P-18:1(9Z))	177959	174534	168717	1	1	1	1	1	1	1	1	1	1	110989	120462	1	1	1	1	1	1	1	1	1	1	1	1	1	1	1	1	1	1	1	1	1	1	1	1	1	1	1	1	1	1	1	1	1	1
PE(18:3(6Z,9Z,12Z)/P-18:1(9Z))	224906	213932	207609	1	1	1	1	1	1	1	1	1	1	116118	136336	1	1	1	1	1	1	1	1	1	1	1	1	1	1	1	1	1	1	1	1	1	1	1	1	1	1	1	1	1	1	1	1	1	1
PE(P-16:0/20:4(5Z,8Z,11Z,14Z))	224906	213932	207609	1	1	1	1	1	1	1	1	1	1	116118	136336	1	1	1	1	1	1	1	1	1	1	1	1	1	1	1	1	1	1	1	1	1	1	1	1	1	1	1	1	1	1	1	1	1	1
PE(18:3(9Z,12Z,15Z)/P-18:1(9Z))	224906	213932	207609	1	1	1	1	1	1	1	1	1	1	116118	136336	1	1	1	1	1	1	1	1	1	1	1	1	1	1	1	1	1	1	1	1	1	1	1	1	1	1	1	1	1	1	1	1	1	1
PE(20:4(8Z,11Z,14Z,17Z)/P-16:0)	224906	213932	207609	1	1	1	1	1	1	1	1	1	1	116118	136336	1	1	1	1	1	1	1	1	1	1	1	1	1	1	1	1	1	1	1	1	1	1	1	1	1	1	1	1	1	1	1	1	1	1
PE(P-18:1(9Z)/18:3(9Z,12Z,15Z))	224906	213932	207609	1	1	1	1	1	1	1	1	1	1	116118	136336	1	1	1	1	1	1	1	1	1	1	1	1	1	1	1	1	1	1	1	1	1	1	1	1	1	1	1	1	1	1	1	1	1	1
PE(P-18:1(11Z)/18:3(9Z,12Z,15Z))	224906	213932	207609	1	1	1	1	1	1	1	1	1	1	116118	136336	1	1	1	1	1	1	1	1	1	1	1	1	1	1	1	1	1	1	1	1	1	1	1	1	1	1	1	1	1	1	1	1	1	1
PE(18:4(6Z,9Z,12Z,15Z)/P-18:0)	224906	213932	207609	1	1	1	1	1	1	1	1	1	1	116118	136336	1	1	1	1	1	1	1	1	1	1	1	1	1	1	1	1	1	1	1	1	1	1	1	1	1	1	1	1	1	1	1	1	1	1
PE(18:3(6Z,9Z,12Z)/P-18:1(11Z))	224906	213932	207609	1	1	1	1	1	1	1	1	1	1	116118	136336	1	1	1	1	1	1	1	1	1	1	1	1	1	1	1	1	1	1	1	1	1	1	1	1	1	1	1	1	1	1	1	1	1	1
PE(P-18:0/18:4(6Z,9Z,12Z,15Z))	224906	213932	207609	1	1	1	1	1	1	1	1	1	1	116118	136336	1	1	1	1	1	1	1	1	1	1	1	1	1	1	1	1	1	1	1	1	1	1	1	1	1	1	1	1	1	1	1	1	1	1
PE(20:4(5Z,8Z,11Z,14Z)/P-16:0)	224906	213932	207609	1	1	1	1	1	1	1	1	1	1	116118	136336	1	1	1	1	1	1	1	1	1	1	1	1	1	1	1	1	1	1	1	1	1	1	1	1	1	1	1	1	1	1	1	1	1	1
PE(P-16:0/20:4(8Z,11Z,14Z,17Z))	224906	213932	207609	1	1	1	1	1	1	1	1	1	1	116118	136336	1	1	1	1	1	1	1	1	1	1	1	1	1	1	1	1	1	1	1	1	1	1	1	1	1	1	1	1	1	1	1	1	1	1
PE(18:3(9Z,12Z,15Z)/P-18:1(11Z))	224906	213932	207609	1	1	1	1	1	1	1	1	1	1	116118	136336	1	1	1	1	1	1	1	1	1	1	1	1	1	1	1	1	1	1	1	1	1	1	1	1	1	1	1	1	1	1	1	1	1	1
PE(P-18:1(11Z)/18:3(6Z,9Z,12Z))	224906	213932	207609	1	1	1	1	1	1	1	1	1	1	116118	136336	1	1	1	1	1	1	1	1	1	1	1	1	1	1	1	1	1	1	1	1	1	1	1	1	1	1	1	1	1	1	1	1	1	1
PE(P-18:1(9Z)/18:3(6Z,9Z,12Z))	224906	213932	207609	1	1	1	1	1	1	1	1	1	1	116118	136336	1	1	1	1	1	1	1	1	1	1	1	1	1	1	1	1	1	1	1	1	1	1	1	1	1	1	1	1	1	1	1	1	1	1
PC(9:0/21:0)	1	1	1	1	1	1	1	1	1	1	1	1	1	1	1	1	1	1	1	1	1	1	1	1	64701	71649	71838	1	1	1	1	1	1	1	1	1	1	1	1	1	1	1	1	1	1	1	1	1	1
DG(22:2n6/0:0/22:5n3)	1	1	1	1	1	1	1	1	1	1	1	1	1	1	1	1	1	1	1	1	1	135316	141620	81050	287752	1146206	1817143	1	1	1	1	1	1	1	396844	250283	49542	1	1	1	262701	1	1	203614	1	413538	164923	1	1
Glucosylceramide (d18:1/9Z-18:1)	1	1	1	1	1	1	1	1	1	1	1	1	1	1	1	1	1	1	1	1	1	1	1	1	1	1	1	1	1	1	1	1	1	1	1	1	1	1	1	1	1	1	1	1	1	1	1	1	1
PE(15:0/20:4(5Z,8Z,11Z,14Z))	908331	1030533	1116303	1406479	1522343	1528246	953422	955682	841417	829977	691135	798616	461944	443204	380532	395865	479243	510283	1316414	1248467	1389179	1024010	1044660	861141	439013	490997	446718	833294	775271	775513	499450	508069	510879	1107771	1042972	1140113	948735	920101	861322	774811	837283	760221	660126	579150	505375	170276	207647	203496	593634
PC(14:1(9Z)/18:3(9Z,12Z,15Z))	908331	1030533	1116303	1406479	1522343	1528246	953422	955682	841417	829977	691135	798616	461944	443204	380532	395865	479243	510283	1316414	1248467	1389179	1024010	1044660	861141	439013	490997	446718	833294	775271	775513	499450	508069	510879	1107771	1042972	1140113	948735	920101	861322	774811	837283	760221	660126	579150	505375	170276	207647	203496	593634
PC(18:3(9Z,12Z,15Z)/14:1(9Z))	908331	1030533	1116303	1406479	1522343	1528246	953422	955682	841417	829977	691135	798616	461944	443204	380532	395865	479243	510283	1316414	1248467	1389179	1024010	1044660	861141	439013	490997	446718	833294	775271	775513	499450	508069	510879	1107771	1042972	1140113	948735	920101	861322	774811	837283	760221	660126	579150	505375	170276	207647	203496	593634
PC(18:3(6Z,9Z,12Z)/14:1(9Z))	908331	1030533	1116303	1406479	1522343	1528246	953422	955682	841417	829977	691135	798616	461944	443204	380532	395865	479243	510283	1316414	1248467	1389179	1024010	1044660	861141	439013	490997	446718	833294	775271	775513	499450	508069	510879	1107771	1042972	1140113	948735	920101	861322	774811	837283	760221	660126	579150	505375	170276	207647	203496	593634
PE(15:0/20:4(8Z,11Z,14Z,17Z))	908331	1030533	1116303	1406479	1522343	1528246	953422	955682	841417	829977	691135	798616	461944	443204	380532	395865	479243	510283	1316414	1248467	1389179	1024010	1044660	861141	439013	490997	446718	833294	775271	775513	499450	508069	510879	1107771	1042972	1140113	948735	920101	861322	774811	837283	760221	660126	579150	505375	170276	207647	203496	593634
PC(14:0/18:4(6Z,9Z,12Z,15Z))	908331	1030533	1116303	1406479	1522343	1528246	953422	955682	841417	829977	691135	798616	461944	443204	380532	395865	479243	510283	1316414	1248467	1389179	1024010	1044660	861141	439013	490997	446718	833294	775271	775513	499450	508069	510879	1107771	1042972	1140113	948735	920101	861322	774811	837283	760221	660126	579150	505375	170276	207647	203496	593634
PE(20:4(8Z,11Z,14Z,17Z)/15:0)	908331	1030533	1116303	1406479	1522343	1528246	953422	955682	841417	829977	691135	798616	461944	443204	380532	395865	479243	510283	1316414	1248467	1389179	1024010	1044660	861141	439013	490997	446718	833294	775271	775513	499450	508069	510879	1107771	1042972	1140113	948735	920101	861322	774811	837283	760221	660126	579150	505375	170276	207647	203496	593634
PC(18:4(6Z,9Z,12Z,15Z)/14:0)	908331	1030533	1116303	1406479	1522343	1528246	953422	955682	841417	829977	691135	798616	461944	443204	380532	395865	479243	510283	1316414	1248467	1389179	1024010	1044660	861141	439013	490997	446718	833294	775271	775513	499450	508069	510879	1107771	1042972	1140113	948735	920101	861322	774811	837283	760221	660126	579150	505375	170276	207647	203496	593634
PC(14:1(9Z)/18:3(6Z,9Z,12Z))	908331	1030533	1116303	1406479	1522343	1528246	953422	955682	841417	829977	691135	798616	461944	443204	380532	395865	479243	510283	1316414	1248467	1389179	1024010	1044660	861141	439013	490997	446718	833294	775271	775513	499450	508069	510879	1107771	1042972	1140113	948735	920101	861322	774811	837283	760221	660126	579150	505375	170276	207647	203496	593634
PE(20:4(5Z,8Z,11Z,14Z)/15:0)	908331	1030533	1116303	1406479	1522343	1528246	953422	955682	841417	829977	691135	798616	461944	443204	380532	395865	479243	510283	1316414	1248467	1389179	1024010	1044660	861141	439013	490997	446718	833294	775271	775513	499450	508069	510879	1107771	1042972	1140113	948735	920101	861322	774811	837283	760221	660126	579150	505375	170276	207647	203496	593634
DG(22:1n9/0:0/20:2n6)	990724	983985	943282	1609865	1683495	1705266	5079132	5301490	5329445	5601384	4924592	4838277	1552475	1563845	1568595	3154736	4393653	4324961	306817	291363	316724	985502	1002476	1039224	6027009	5914345	6163034	1281270	1180912	1258510	794300	802190	829593	2889364	2919360	2911598	1969964	2012962	2018288	5664769	5199976	5579258	2842097	2874230	2882979	5578004	5532931	5282461	1147585
DG(20:3(5Z,8Z,11Z)/22:0/0:0)	990724	983985	943282	1609865	1683495	1705266	5079132	5301490	5329445	5601384	4924592	4838277	1552475	1563845	1568595	3154736	4393653	4324961	306817	291363	316724	985502	1002476	1039224	6027009	5914345	6163034	1281270	1180912	1258510	794300	802190	829593	2889364	2919360	2911598	1969964	2012962	2018288	5664769	5199976	5579258	2842097	2874230	2882979	5578004	5532931	5282461	1147585
DG(18:3(6Z,9Z,12Z)/24:0/0:0)	990724	983985	943282	1609865	1683495	1705266	5079132	5301490	5329445	5601384	4924592	4838277	1552475	1563845	1568595	3154736	4393653	4324961	306817	291363	316724	985502	1002476	1039224	6027009	5914345	6163034	1281270	1180912	1258510	794300	802190	829593	2889364	2919360	2911598	1969964	2012962	2018288	5664769	5199976	5579258	2842097	2874230	2882979	5578004	5532931	5282461	1147585
DG(22:0/20:3(5Z,8Z,11Z)/0:0)	990724	983985	943282	1609865	1683495	1705266	5079132	5301490	5329445	5601384	4924592	4838277	1552475	1563845	1568595	3154736	4393653	4324961	306817	291363	316724	985502	1002476	1039224	6027009	5914345	6163034	1281270	1180912	1258510	794300	802190	829593	2889364	2919360	2911598	1969964	2012962	2018288	5664769	5199976	5579258	2842097	2874230	2882979	5578004	5532931	5282461	1147585
DG(24:0/18:3(9Z,12Z,15Z)/0:0)	990724	983985	943282	1609865	1683495	1705266	5079132	5301490	5329445	5601384	4924592	4838277	1552475	1563845	1568595	3154736	4393653	4324961	306817	291363	316724	985502	1002476	1039224	6027009	5914345	6163034	1281270	1180912	1258510	794300	802190	829593	2889364	2919360	2911598	1969964	2012962	2018288	5664769	5199976	5579258	2842097	2874230	2882979	5578004	5532931	5282461	1147585
DG(22:0/0:0/20:3n9)	990724	983985	943282	1609865	1683495	1705266	5079132	5301490	5329445	5601384	4924592	4838277	1552475	1563845	1568595	3154736	4393653	4324961	306817	291363	316724	985502	1002476	1039224	6027009	5914345	6163034	1281270	1180912	1258510	794300	802190	829593	2889364	2919360	2911598	1969964	2012962	2018288	5664769	5199976	5579258	2842097	2874230	2882979	5578004	5532931	5282461	1147585
DG(24:0/0:0/18:3n3)	990724	983985	943282	1609865	1683495	1705266	5079132	5301490	5329445	5601384	4924592	4838277	1552475	1563845	1568595	3154736	4393653	4324961	306817	291363	316724	985502	1002476	1039224	6027009	5914345	6163034	1281270	1180912	1258510	794300	802190	829593	2889364	2919360	2911598	1969964	2012962	2018288	5664769	5199976	5579258	2842097	2874230	2882979	5578004	5532931	5282461	1147585
DG(22:0/0:0/20:3n6)	990724	983985	943282	1609865	1683495	1705266	5079132	5301490	5329445	5601384	4924592	4838277	1552475	1563845	1568595	3154736	4393653	4324961	306817	291363	316724	985502	1002476	1039224	6027009	5914345	6163034	1281270	1180912	1258510	794300	802190	829593	2889364	2919360	2911598	1969964	2012962	2018288	5664769	5199976	5579258	2842097	2874230	2882979	5578004	5532931	5282461	1147585
DG(24:0/0:0/18:3n6)	990724	983985	943282	1609865	1683495	1705266	5079132	5301490	5329445	5601384	4924592	4838277	1552475	1563845	1568595	3154736	4393653	4324961	306817	291363	316724	985502	1002476	1039224	6027009	5914345	6163034	1281270	1180912	1258510	794300	802190	829593	2889364	2919360	2911598	1969964	2012962	2018288	5664769	5199976	5579258	2842097	2874230	2882979	5578004	5532931	5282461	1147585
DG(20:1(11Z)/22:2(13Z,16Z)/0:0)	990724	983985	943282	1609865	1683495	1705266	5079132	5301490	5329445	5601384	4924592	4838277	1552475	1563845	1568595	3154736	4393653	4324961	306817	291363	316724	985502	1002476	1039224	6027009	5914345	6163034	1281270	1180912	1258510	794300	802190	829593	2889364	2919360	2911598	1969964	2012962	2018288	5664769	5199976	5579258	2842097	2874230	2882979	5578004	5532931	5282461	1147585
DG(20:2(11Z,14Z)/22:1(13Z)/0:0)	990724	983985	943282	1609865	1683495	1705266	5079132	5301490	5329445	5601384	4924592	4838277	1552475	1563845	1568595	3154736	4393653	4324961	306817	291363	316724	985502	1002476	1039224	6027009	5914345	6163034	1281270	1180912	1258510	794300	802190	829593	2889364	2919360	2911598	1969964	2012962	2018288	5664769	5199976	5579258	2842097	2874230	2882979	5578004	5532931	5282461	1147585
[truncated: 1,795 more rows]
[truncated: 92 more columns]

## Sheet: dataset no isomers BMDB
Compound	PR10_-r001	PR10_-r002	PR10_-r003	PR11_-r001	PR11_-r002	PR11_-r003	PR12_-r001	PR12_-r002	PR12_-r003	PR13_-r001	PR13_-r002	PR13_-r003	PR14_-r001	PR14_-r002	PR14_-r003	PR15_-r001	PR15_-r002	PR15_-r003	PR16_-r001	PR16_-r002	PR16_-r003	PR17_-r001	PR17_-r002	PR17_-r003	PR18_-r001	PR18_-r002	PR18_-r003	PR19_-r001	PR19_-r002	PR19_-r003	PR20_-r001	PR20_-r002	PR20_-r003	PR21_-r001	PR21_-r002	PR21_-r003	PR22_-r001	PR22_-r002	PR22_-r003	PR23_-r001	PR23_-r002	PR23_-r003	PR24_-r001	PR24_-r002	PR24_-r003	PR25_-r001	PR25_-r002	PR25_-r003	PR26_-r001
[truncated: 561 more rows]
[truncated: 90 more columns]

[truncated: 6 more sheets: MSMS Mona, OPLS-DA, metagenomics_family, metagenomics_genus, Pearson's family, Pearson's genus]
